# Supplementary material for: Radiosensitization of Human Leukemic HL-60 Cells by ATR Kinase Inhibitor (VE-821): Phosphoproteomic Analysis
Source: Int J Mol Sci. 2014 Jul 7;15(7):12007–26. doi: 10.3390/ijms150712007 (PMC4139827; doi:10.3390/ijms150712007)
Supplement: Supplementary File 1 [file ijms-15-12007-s001.xlsx]

## Sheet: Phosphorylation sites
Table S1. Overview of all identified phosphorylation sites.
Protein	Position	Leading proteins	Positions	Proteins	Positions within proteins	Protein names	Gene names	Amino acid	GRT upregulated FDR 1%	GRT downregulated FDR 1%	Log2(Ratio H/L normalized Rep_1)	Log2(Ratio H/L normalized Rep_2)	Log2(Ratio H/L normalized Rep_3)	Log2(Ratio H/L normalized)	Log2(Ratio H/L unmodified peptide)	Log2(Ratio H/L protein)	Log2(Ratio H/L protein) B significant	Log2(Ratio H/L protein) Significance B	PEP	Score	Localization prob	Score for localization	Score diff	m/z	Mass error [ppm]	Sequence window	Modified sequence	NetPhorest group	NetworKIN 3 Kinase/Phosphatase/Phospho-binding domain	NetPhorest probability	STRING score	NetworKIN score	iGPS Predictor	iGPS Kinase gene name	iGPS Score	iGPS (high confidence) cutoff	HPRD database linear motifs
A0AVK6	102	A0AVK6	102	A0AVK6;E9PMT9	102;102	Transcription factor E2F8	E2F8;E2F8	S			-0.0237977	-0.197071	-0.360212	-0.256425				1	3.17e-17	158.45	1	158.45	158.452	898.353	0.15824	RSGLPEAKDCIHEHLSGDEFEKSQPSRKEKS	_DCIHEHLS(ph)GDEFEK_										AMP-activated protein kinase substrate motif;Casein kinase I substrate motif;Casein kinase II substrate motif
A0AVK6	413	A0AVK6	413	A0AVK6	413	Transcription factor E2F8	E2F8	S				-0.140555		-0.140555				1	0.000335287	85.006	0.999746	85.006	34.9047	651.299	1.5001	IKLVKSIESDRRKINSAPSSPIKTNKAESSQ	_KINS(ph)APSS(ph)PIK_	PAK_group	PAK1	0.1885	0.1054	1.3617					Casein kinase I substrate motif;Casein kinase II substrate motif;G protein-coupled receptor kinase 1 substrate motif;GSK3 kinase substrate motif;PKA kinase substrate motif;PKC kinase substrate motif
A0AVK6	417	A0AVK6	417	A0AVK6	417	Transcription factor E2F8	E2F8	S				-0.337867		-0.337867				1	0.000335287	85.006	0.786803	85.006	5.66943	651.299	1.5001	KSIESDRRKINSAPSSPIKTNKAESSQNSAP	_KINS(ph)APSS(ph)PIK_	CDK2_CDK3_CDK1_CDK5_group;MAPK3_MAPK1_MAPK7_NLK_group	CDK1;MAPK1;MAPK3	0.2448	0.2131	1.7166					Casein kinase I substrate motif;Cdc2 kinase substrate motif;CDK kinase substrate motif;CDK1,2,4,6 kinase substrate motif;ERK1,2 kinase substrate motif;G protein-coupled receptor kinase 1 substrate motif;Growth associated histone HI kinase substrate motif;GSK-3, ERK1, ERK2, CDK5 substrate motif;MAPKAPK2 kinase substrate motif;MDC1 BRCT domain binding motif;Plk1 PBD domain binding motif;WW domain b…
A0AVK6	71	A0AVK6	71	A0AVK6;E9PMT9	71;71	Transcription factor E2F8	E2F8;E2F8	S	+		1.30007	1.33925	1.42793	1.34846				1	8.34e-07	121.76	0.99999	105.14	49.8256	656.323	-0.46885	PWTPTANLKMLISAVSPEIRNRDQKRGLFDN	_M(ox)LISAVS(ph)PEIR_	CDK2_CDK3_CDK1_CDK5_group;CK1_group	CDK1;CSNK1A1	0.1875	0.32335	4.03565					Casein kinase II substrate motif;ERK1,2 kinase substrate motif;GSK-3, ERK1, ERK2, CDK5 substrate motif;WW domain binding motif
A0FGR8	755	A0FGR8	755	A0FGR8;H7BXI1;F2Z3K9	755;718;162	Extended synaptotagmin-2	ESYT2;ESYT2;ESYT2	S			-0.0393252	-0.0825759	0.0758749	-0.0393252		0.200253		0.290275	0.000324511	65.901	0.916999	46.307	13.8726	766.694	0.50612	LLASPGHISVKEPTPSIASDISLPIATQELR	_EPT(ph)PS(ph)IASDISLPIATQELR_										Casein kinase I substrate motif;Casein kinase II substrate motif;DNA dependent Protein kinase substrate motif
A0FGR8	758	A0FGR8	758	A0FGR8;H7BXI1;F2Z3K9	758;721;165	Extended synaptotagmin-2	ESYT2;ESYT2;ESYT2	S			-0.0269398	0.0192037	0.133958	0.0243197		0.200253		0.290275	4.38e-05	88.517	0.966214	88.517	16.5429	1149.54	0.2713	SPGHISVKEPTPSIASDISLPIATQELRQRL	_EPTPSIAS(ph)DIS(ph)LPIATQELR_	CK1_group	CSNK1A1	0.1246	0.0973	1.3564					Casein kinase I substrate motif;Casein kinase II substrate motif
A0FGR8	761	A0FGR8	761	A0FGR8;H7BXI1;F2Z3K9	761;724;168	Extended synaptotagmin-2	ESYT2;ESYT2;ESYT2	S			-0.117631	-0.185458	0.15043	-0.117631		0.200253		0.290275	1.26e-10	132.26	0.999739	132.26	36.5986	1109.55	0.056616	HISVKEPTPSIASDISLPIATQELRQRLRQL	_EPTPSIASDIS(ph)LPIATQELR_	CK1_group	CSNK1A1	0.1318	0.0973	1.3564					G protein-coupled receptor kinase 1 substrate motif
A0FGR8	738	A0FGR8	738	A0FGR8;H7BXI1;F2Z3K9	738;701;145	Extended synaptotagmin-2	ESYT2;ESYT2;ESYT2	S				0.161694	-0.0554564	-0.0434675		0.200253		0.290275	0.00130125	69.148	0.872239	66.152	12.6985	775.385	0.62286	PEAGPQGLHDLGRSSSSLLASPGHISVKEPT	_SSS(ph)SLLASPGHISVK_	CaMKII_group;PAK_group	CAMK2A;PAK1	0.14135	0.1041	1.38045					14-3-3 domain binding motif;Calmodulin-dependent protein kinase II substrate motif;Calmodulin-dependent protein kinase IV substrate motif;Chk1 kinase substrate motif;G protein-coupled receptor kinase 1 substrate motif;MDC1 BRCT domain binding motif;PKA kinase substrate motif;PKC kinase substrate motif;Plk1 PBD domain binding motif
A0FGR8	739	A0FGR8	739	A0FGR8;H7BXI1;F2Z3K9	739;702;146	Extended synaptotagmin-2	ESYT2;ESYT2;ESYT2	S			0.136585	0.280125		0.208392		0.200253		0.290275	0.00122694	70.335	0.516668	70.335	0.597965	517.259	0.32485	EAGPQGLHDLGRSSSSLLASPGHISVKEPTP	_SSSS(ph)LLASPGHISVK_	PAK_group;PKC_group	PAK1;PRKCB	0.1587	0.116	1.3145					G protein-coupled receptor kinase 1 substrate motif;GSK3 kinase substrate motif;MDC1 BRCT domain binding motif;Plk1 PBD domain binding motif
A0FGR8	753	A0FGR8	753	A0FGR8;H7BXI1;F2Z3K9	753;716;160	Extended synaptotagmin-2	ESYT2;ESYT2;ESYT2	T			-0.131455	-0.0825759	-0.0151555	-0.131455		0.200253		0.290275	0.00023711	81.949	0.972218	46.307	19.885	766.694	0.50612	SSLLASPGHISVKEPTPSIASDISLPIATQE	_EPT(ph)PS(ph)IASDISLPIATQELR_										DNA dependent Protein kinase substrate motif;G protein-coupled receptor kinase 1 substrate motif;GSK-3, ERK1, ERK2, CDK5 substrate motif;PKA kinase substrate motif;PKC kinase substrate motif;WW domain binding motif
A0MZ66	506	A0MZ66	506	A0MZ66	506	Shootin-1	KIAA1598	S			0.102188	-0.0953271	-0.0758697	-0.0758697				1	0.00627264	57.525	0.999979	57.525	48.7282	694.331	0.19556	DSSSPTGILATSESKSMPVLGSVSSVTKTAL	_S(ph)M(ox)PVLGSVSSVTK_	CK1_group	CSNK1A1	0.1174	0.1134	1.3564					Casein kinase I substrate motif;MAPKAPK2 kinase substrate motif
A1L390	76	A1L390	76	A1L390;G3V278;G3V3I3	76;76;76	Pleckstrin homology domain-containing family G member 3	PLEKHG3;PLEKHG3;PLEKHG3	S			0.178364	0.229588	0.0697021	0.165944				1	0.000256118	117.86	1	117.86	64.6483	527.74	0.21531	SNNNSSSWLNVKGPLSPFNSRAAAGPAHHKL	_GPLS(ph)PFNSR_	MAPK3_MAPK1_MAPK7_NLK_group	MAPK1;MAPK3	0.2895	0.1278	1.8269					Casein kinase I substrate motif;ERK1,2 kinase substrate motif;G protein-coupled receptor kinase 1 substrate motif;GSK3 kinase substrate motif;GSK-3, ERK1, ERK2, CDK5 substrate motif;PKA kinase substrate motif;WW domain binding motif
A1L390	640	A1L390	640	A1L390;G3V311	640;145	Pleckstrin homology domain-containing family G member 3	PLEKHG3;PLEKHG3	S			0.454281			0.454281				1	0.0011238	74.12	0.600691	74.12	4.39076	691.778	1.8828	KSSGFGSPRLVSRSSSVLSLEGSEKGLARHG	_SSS(ph)VLS(ph)LEGSEK_	CaMKII_group;PAK_group	CAMK2A;PAK1	0.17635	0.0819	1.6317					14-3-3 domain binding motif;Calmodulin-dependent protein kinase I substrate motif;Calmodulin-dependent protein kinase II alpha substrate motif;Calmodulin-dependent protein kinase II substrate motif;Calmodulin-dependent protein kinase IV substrate motif;Casein kinase I substrate motif;Casein kinase II substrate motif;Chk1 kinase substrate motif;MAPKAPK2 kinase substrate motif;MDC1 BRCT domain bind…
A1L390	643	A1L390	643	A1L390;G3V311	643;148	Pleckstrin homology domain-containing family G member 3	PLEKHG3;PLEKHG3	S			-0.462038		-0.131598	-0.296828				1	3.14e-05	103.88	0.999125	103.88	30.5791	651.795	0.41992	GFGSPRLVSRSSSVLSLEGSEKGLARHGSAT	_SSSVLS(ph)LEGSEK_	CK1_group	CSNK1A1	0.1349	0.067	1.3564					Casein kinase II substrate motif;G protein-coupled receptor kinase 1 substrate motif;GSK3 kinase substrate motif;MAPKAPK2 kinase substrate motif
A2A274	151	A2A274	151	A2A274;Q99798	151;151	Aconitate hydratase, mitochondrial	ACO2;ACO2	Y			-0.216636			-0.216636	-0.385714	-0.234109		0.325309	0.0193245	58.073	1	58.073	58.0727	957.9	0.69035	GEKDLRRAKDINQEVYNFLATAGAKYGVGFW	_DIN(de)QEVY(ph)NFLAT(ph)AGAK_										JAK2 kinase substrate motif;SHP1 phosphatase substrate motif
A2A288	428	A2A288	428	A2A288	428	Probable ribonuclease ZC3H12D	ZC3H12D	S			-0.0632735			-0.0632735				1	7.16e-10	131.53	1	131.53	131.534	601.782	0.26691	PRGEHRPRDLHGDLLSPRRPPDDPWARPPRS	_DLHGDLLS(ph)PR_	MAPK3_MAPK1_MAPK7_NLK_group;PKC_group	MAPK1;MAPK3;PRKCB	0.271	0.2859	1.7334					Casein kinase I substrate motif;Cdc2 kinase substrate motif;CDK kinase substrate motif;CDK1,2,4,6 kinase substrate motif;ERK1,2 kinase substrate motif;G protein-coupled receptor kinase 1 substrate motif;Growth associated histone HI kinase substrate motif;GSK-3, ERK1, ERK2, CDK5 substrate motif;PKA kinase substrate motif;PKC kinase substrate motif;WW domain binding motif
A2A3N6	407	A2A3N6	407	A2A3N6;Q99755;A6PW57	407;460;448	Putative PIP5K1A and PSMD4-like protein;Phosphatidylinositol 4-phosphate 5-kinase type-1 alpha	PIPSL;PIP5K1A;PIP5K1A	S			0.92691			0.92691				1	0.00278692	87.001	0.871377	87.001	8.30887	392.225	0.41387	MCNTVFKKIPLKPSPSKKLRSGSSFSQRAGS	_IPLKPSPS(ph)KK_	PKC_group	PRKCA;PRKCB;PRKCZ	0.3085	0.0909	1.4724					DNA dependent Protein kinase substrate motif;PKA kinase substrate motif;PKC kinase substrate motif
A2AB09	6	A2AB09	6	A2AB09	6		FLOT1	S										1	0.00673476	60.255	1	60.255	60.2551	568.276	-5.1198	__________MRPWWSPVKIQGQNKEMLAAA	_RPWWS(ph)PVK_										AMP-activated protein kinase substrate motif;Cdc2 kinase substrate motif;CDK kinase substrate motif;CDK1,2,4,6 kinase substrate motif;ERK1,2 kinase substrate motif;GSK-3, ERK1, ERK2, CDK5 substrate motif;WW domain binding motif
A2ABF9	122	A2ABF9	122	A2ABF9;A2ABF8;Q96KQ7	122;122;65	Histone-lysine N-methyltransferase EHMT2	EHMT2;EHMT2;EHMT2	S										1	1.59e-09	68.414	0.184358	68.414	0.306246	1236.57	0.87832	TLPKATPDSLEPAGPSSPASVTVTVGDEGAD	_ATPDSLEPAGPS(ph)SPASVTVTVGDEGADTPVGATPLIGDESENLEGDGDLR_										Casein kinase I substrate motif;DNA dependent Protein kinase substrate motif;G protein-coupled receptor kinase 1 substrate motif;GSK3 kinase substrate motif
A2ABF9	230	A2ABF9	230	A2ABF9;A2ABF8;Q96KQ7	230;230;173	Histone-lysine N-methyltransferase EHMT2	EHMT2;EHMT2;EHMT2	S					0.291604	0.291604				1	0.00936907	38.453	0.502516	38.453	2.68474	933.44	0.29409	QGAAAAGSEPPPATTSPEGQPKVHRARKTMS	_LLSMPGAQGAAAAGSEPPPATTS(ph)PEGQPK_	MAPK3_MAPK1_MAPK7_NLK_group	MAPK1;MAPK3	0.2368	0.02885	1.3656					Casein kinase II substrate motif;ERK1,2 kinase substrate motif;GSK-3, ERK1, ERK2, CDK5 substrate motif;WW domain binding motif
A2ABF9	197	A2ABF9	197	A2ABF9;A2ABF8;Q96KQ7	197;197;140	Histone-lysine N-methyltransferase EHMT2	EHMT2;EHMT2;EHMT2	S			0.328492	-0.597867	0.0377336	0.0395596				1	0.000226711	90.412	0.999974	90.412	45.9013	634.789	0.2631	SCPSRAKMSMTGAGKSPPSVQSLAMRLLSMP	_S(ph)PPSVQSLAM(ox)R_	MAPK3_MAPK1_MAPK7_NLK_group	MAPK3	0.145	0.0305	1.075					Casein kinase I substrate motif;Casein kinase II substrate motif;ERK1, ERK2, SAPK, CDK5 and GSK3 kinase substrate motif;ERK1,2 kinase substrate motif;Growth associated histone HI kinase substrate motif;GSK-3, ERK1, ERK2, CDK5 substrate motif;WW domain binding motif
A2ABF9	176	A2ABF9	176	A2ABF9;A2ABF8;Q96KQ7	176;176;119	Histone-lysine N-methyltransferase EHMT2	EHMT2;EHMT2;EHMT2	S			0.0968015	0.260989	0.188148	0.188148				1	0.0104345	65.5	0.799503	65.5	8.15211	458.694	-0.15921	GGRILLGHATKSFPSSPSKGGSCPSRAKMSM	_SFPSS(ph)PSK_	MAPK3_MAPK1_MAPK7_NLK_group	MAPK3	0.2304	0.0305	1.6461					Casein kinase II substrate motif;Cdc2 kinase substrate motif;CDK kinase substrate motif;CDK1,2,4,6 kinase substrate motif;ERK1,2 kinase substrate motif;Growth associated histone HI kinase substrate motif;GSK-3, ERK1, ERK2, CDK5 substrate motif;MAPKAPK2 kinase substrate motif;MDC1 BRCT domain binding motif;Plk1 PBD domain binding motif;WW domain binding motif
A2ABF9	303	A2ABF9	303	A2ABF9;A2ABF8;Q96KQ7	303;303;246	Histone-lysine N-methyltransferase EHMT2	EHMT2;EHMT2;EHMT2	S					1.09646	1.09646				1	2.6e-05	113.69	1	113.69	63.3899	457.715	0.14093	NSGGGLSEELGSARRSGEVTLTKGDPGSLEE	_S(ph)GEVTLTK_	PAK_group	PAK1	0.1585	0.0278	1.2983					Casein kinase I substrate motif;Casein kinase II substrate motif;G protein-coupled receptor kinase 1 substrate motif;MAPKAPK2 kinase substrate motif;PKA kinase substrate motif;PKC kinase substrate motif
A2RRP1	473	A2RRP1	473	A2RRP1	473	Neuroblastoma-amplified sequence	NBAS	S			0.0597706	1.21188	0.883073	0.558268				1	2.21e-54	221.14	0.990066	221.14	19.9865	1127.91	-0.758	RLETRAGEEDEGEEDSDSDYEISAKARYFGY	_AGEEDEGEEDS(ph)DSDYEISAK_	CK1_group	CSNK1A1	0.1349	0.0605	1.3564					b-Adrenergic Receptor kinase substrate motif;Casein kinase I substrate motif;Casein kinase II substrate motif;Pyruvate dehydrogenase kinase substrate motif
A2RRP1	475	A2RRP1	475	A2RRP1	475	Neuroblastoma-amplified sequence	NBAS	S					0.233643	0.233643				1	1.96e-31	181.26	0.847801	181.26	7.45982	1127.91	-0.31703	ETRAGEEDEGEEDSDSDYEISAKARYFGYIK	_AGEEDEGEEDSDS(ph)DYEISAK_	CK1_group	CSNK1A1	0.1403	0.0605	1.3564					b-Adrenergic Receptor kinase substrate motif;Casein kinase I substrate motif;Casein kinase II substrate motif
A2VCL2	866	A2VCL2	866	A2VCL2	866	Coiled-coil domain-containing protein 162	CCDC162P	T					0.582363	0.582363				1	0.01474	106.42	1	106.42	106.423	431.725	0.57083	NLKGSKITRWIQRPQTVPIKHKKRTDDVFLP	_PQT(ph)VPIK_										Calmodulin-dependent protein kinase II alpha substrate motif;Calmodulin-dependent protein kinase II substrate motif;Calmodulin-dependent protein kinase IV substrate motif;Chk1 kinase substrate motif;PKC kinase substrate motif
A3KN83	214	A3KN83	214	A3KN83	214	Protein strawberry notch homolog 1	SBNO1	S			-0.109437	-0.043631	-0.158768	-0.107648				1	0.00360829	132.84	0.999805	132.84	37.2337	439.18	-0.483	EGARMWINDMKMRSFSPTMKVPVVKEDDEPE	_SFS(ph)PTMK_										14-3-3 domain binding motif;Akt kinase substrate motif;AMP-activated protein kinase 2 substrate motif;Calmodulin-dependent protein kinase II substrate motif;Casein kinase II substrate motif;ERK1,2 kinase substrate motif;GSK-3, ERK1, ERK2, CDK5 substrate motif;MAPKAPK1 kinase substrate motif;PKA kinase substrate motif;PKC kinase substrate motif;WW domain binding motif
A3KN83	794	A3KN83	794	A3KN83	794	Protein strawberry notch homolog 1	SBNO1	S			0.399554	0.432425		0.432425				1	2.19e-05	109.39	0.997911	109.39	26.7924	969.975	-0.91232	IRKDHKKNKEKKKKKSIDPDSIQSALLASGL	_S(ph)IDPDSIQSALLASGLGSK_	ACTR2_ACTR2B_TGFbR2_group;PAK_group	PAK1;TGFBR2	0.18785	0.401	1.42805					Phosphorylase kinase substrate motif;Pim1 kinase substrate sequence;PKA kinase substrate motif;PKC kinase substrate motif
A4D212	1304	A4D212	1304	A4D212;Q8N201	1304;1142	Integrator complex subunit 1	DKFZP586J0619;INTS1	S			0.184979			0.184978				1	5.76e-05	105.67	0.861421	105.67	9.00516	1134.48	-0.019235	YVRRMRQSKEGEEVYSWSESQDQVFLRWSSG	_EGEEVYS(ph)WSESQDQVFLR_	CDK7;CK1_group	CDK7;CSNK1A1	0.06575	0.61425	2.0299					Casein kinase I substrate motif;Casein kinase II substrate motif;G protein-coupled receptor kinase 1 substrate motif;GSK3 kinase substrate motif
A4D212	1525	A4D212	1525	A4D212;Q8N201	1525;1326	Integrator complex subunit 1	DKFZP586J0619;INTS1	S			-0.182115	0.0747794	0.172616	0.0747794				1	1.47e-05	112.82	0.5	45.183	0	618.766	-0.8654	SLPPRRDSTEAPKPKSSPEQPIGQGRIRVGT	_S(ph)SPEQPIGQ(de)GR_	CDK7;PAK_group	CDK7;PAK1	0.0849	0.5768	2.32985					Casein kinase II substrate motif;PKA kinase substrate motif;PKC kinase substrate motif
A4D212	1526	A4D212	1526	A4D212;Q8N201	1526;1327	Integrator complex subunit 1	DKFZP586J0619;INTS1	S			-0.182115	0.0747794	0.172616	0.0747794				1	1.47e-05	112.82	0.5	45.183	0	618.766	-0.8654	LPPRRDSTEAPKPKSSPEQPIGQGRIRVGTQ	_S(ph)SPEQPIGQ(de)GR_	CDK7	CDK7	0.012	0.899	2.5961					Casein kinase II substrate motif;ERK1,2 kinase substrate motif;G protein-coupled receptor kinase 1 substrate motif;GSK-3, ERK1, ERK2, CDK5 substrate motif;MDC1 BRCT domain binding motif;PKA kinase substrate motif;PKC kinase substrate motif;Plk1 PBD domain binding motif;WW domain binding motif
A4D212	1594	A4D212	1594	A4D212;Q8N201	1594;1395	Integrator complex subunit 1	DKFZP586J0619;INTS1	S			0.538041	-0.0327723	0.19333	0.19333				1	1.86e-05	100.77	0.999999	100.77	62.1575	759.39	-0.26535	LQQALGQELARVVQGSPEVPGITVRVLQALA	_VVQGS(ph)PEVPGITVR_	CDK7	CDK7	0.0156	0.899	2.8055					Casein kinase II substrate motif;ERK1,2 kinase substrate motif;G protein-coupled receptor kinase 1 substrate motif;GSK-3, ERK1, ERK2, CDK5 substrate motif;WW domain binding motif
A6NC98	1379	A6NC98	1379	A6NC98	1379	Coiled-coil domain-containing protein 88B	CCDC88B	S			0.0227584	-0.302973	0.166972	0.0227584				1	2.68e-05	108.92	0.999365	107.33	31.9687	647.966	-0.20935	DGTGSPSPAPMRRAQSSLCLRDETLAGGQRR	_AQS(ph)SLCLRDETLAGGQR_	CaMKII_group;PAK_group	CAMK2A;PAK1	0.16085	0.0893	1.49145					14-3-3 domain binding motif;AMP-activated protein kinase substrate motif;Calmodulin-dependent protein kinase I substrate motif;Calmodulin-dependent protein kinase II substrate motif;Calmodulin-dependent protein kinase IV substrate motif;Chk1 kinase substrate motif;PKA kinase substrate motif;PKC kinase substrate motif;ZIP kinase substrate motif
A6NC98	1368	A6NC98	1368	A6NC98	1368	Coiled-coil domain-containing protein 88B	CCDC88B	S										1	0.00206009	56.121	0.68051	56.121	4.62536	726.795	1.9909	PETELPEGREADGTGSPSPAPMRRAQSSLCL	_EADGTGS(ph)PSPAPMR_	MAPK3_MAPK1_MAPK7_NLK_group	MAPK1;MAPK3	0.313	0.1494	1.8269					Casein kinase II substrate motif;ERK1,2 kinase substrate motif;G protein-coupled receptor kinase 1 substrate motif;GSK-3, ERK1, ERK2, CDK5 substrate motif;WW domain binding motif
A6NC98	1370	A6NC98	1370	A6NC98	1370	Coiled-coil domain-containing protein 88B	CCDC88B	S										1	0.00371248	48.037	0.498303	48.037	0.770165	726.795	0.64403	TELPEGREADGTGSPSPAPMRRAQSSLCLRD	_EADGTGSPS(ph)PAPMR_	MAPK3_MAPK1_MAPK7_NLK_group	MAPK1;MAPK3	0.2907	0.1494	1.8269					DNA dependent Protein kinase substrate motif;ERK1,2 kinase substrate motif;GSK-3, ERK1, ERK2, CDK5 substrate motif;WW domain binding motif
A6NC98	1408	A6NC98	1408	A6NC98	1408	Coiled-coil domain-containing protein 88B	CCDC88B	S			0.0607391	-0.0563411	0.0589399	0.0589399				1	2.24e-07	127.32	0.999711	127.32	37.3301	673.767	0.37015	RRKLSSRFPVGRSSESFSPGDTPRQRFRQRH	_SSES(ph)FSPGDTPR_	CK1_group;PAK_group;PKC_group	CSNK1A1;PAK1;PRKCA;PRKCB	0.16885	0.0939	1.3266					b-Adrenergic Receptor kinase substrate motif;Casein kinase II substrate motif
A6NCL7	405	A6NCL7	405	A6NCL7	405	Ankyrin repeat domain-containing protein 33B	ANKRD33B	S			-0.186722	0.0824301	-0.0426797	-0.0377101				1	0.00027978	98.105	1	49.081	49.0806	553.802	0.1869	ALGSRGPAAPAPRKASLLPLQRLRRRSVRPG	_KAS(ph)LLPLQ(de)R_										14-3-3 domain binding motif;Calmodulin-dependent protein kinase II substrate motif;Phosphorylase kinase substrate motif;PKA kinase substrate motif;PKC epsilon kinase substrate motif;PKC kinase substrate motif
A6NCL7	416	A6NCL7	416	A6NCL7	416	Ankyrin repeat domain-containing protein 33B	ANKRD33B	S		+	-2.42927	-2.2325	-2.26347	-2.26347				1	0.00138559	84.718	1	53.448	53.4477	573.313	0.29204	PRKASLLPLQRLRRRSVRPGVVVPRVRVSKA	_S(ph)VRPGVVVPR_										14-3-3 domain binding motif;Akt kinase substrate motif;Aurora-A kinase substrate motif;Calmodulin-dependent protein kinase II substrate motif;DMPK1 kinase substrate motif;DMPK1,2 kinase substrate motif;MAPKAPK1 kinase substrate motif;p70 Ribosomal S6 kinase substrate motif;PAK2 kinase substrate motif;Phosphorylase kinase substrate motif;PKA kinase substrate motif;PKC epsilon kinase substrate moti…
A6ND36	356	A6ND36	356	A6ND36	356	Protein FAM83G	FAM83G	S			-0.266819	-0.376246	-0.371684	-0.371684				1	8e-05	126.1	1	120.9	120.895	520.755	0.60962	AKKLVNPKYALVKAKSVDEIAKISSEKQEAK	_AKS(ph)VDEIAK_	CaMKII_group	CAMK2A	0.1555	0.184	1.9017					AMP-activated protein kinase substrate motif;Calmodulin-dependent protein kinase II substrate motif;Casein kinase II substrate motif;Chk1 kinase substrate motif;HMGCoA Reductase kinase substrate motif;Phosphorylase kinase substrate motif;PKA kinase substrate motif;PKC kinase substrate motif
A6NFI3	10	A6NFI3	10	A6NFI3	10	Zinc finger protein 316	ZNF316	S			0.100036	0.0301242	0.0223323	0.0354832				1	2.58e-106	286.7	0.99998	238.8	47.8453	900.912	0.51019	______MAALHTTPDSPAAQLERAEDGSECD	_(ac)AALHTTPDS(ph)PAAQ(de)LER_	MAPK3_MAPK1_MAPK7_NLK_group	MAPK3	0.2068	0.1436	1.5301					b-Adrenergic Receptor kinase substrate motif;ERK1,2 kinase substrate motif;GSK-3, ERK1, ERK2, CDK5 substrate motif;WW domain binding motif
A6NFI3	112	A6NFI3	112	A6NFI3	112	Zinc finger protein 316	ZNF316	S			0.101247	-0.0788379	-0.0560711	-0.00961144				1	5.52e-54	241.87	1	149.09	149.088	655.305	0.79928	ALGTQERLSRGGDAKSPVLQEKGLQASRAPA	_GGDAKS(ph)PVLQ(de)EK_										Casein kinase I substrate motif;ERK1,2 kinase substrate motif;Growth associated histone HI kinase substrate motif;GSK-3, ERK1, ERK2, CDK5 substrate motif;WW domain binding motif
A6NFN2	232	A6NFN2	232	A6NFN2;Q8IZP0;F8WA56;F8WA55;F5H1G9	232;231;232;232;232	Abl interactor 1	ABI1;ABI1;ABI1;ABI1;ABI1	S			0.081067		-0.559898	-0.239447				1	0.00677209	70.977	0.997724	64.82	26.4175	374.852	0.098216	SPARLGSQHSPGRTASLNQRPRTHSGSSGGS	_TAS(ph)LNQRPR_	AMPK_group;CK1_group;PAK_group;PKB_group;PKC_group	AKT1;CSNK1A1;PAK1;PAK2;PRKAA1;PRKCA;PRKCB	0.137	0.467	1.624					14-3-3 domain binding motif;Calmodulin-dependent protein kinase II substrate motif;Phosphorylase kinase substrate motif;PKA kinase substrate motif;PKC kinase substrate motif
A6NG51	1217	A6NG51	1217	A6NG51;Q13813	1217;1217	Spectrin alpha chain, brain	SPTAN1;SPTAN1	S			-0.0666238	0.216734	0.254715	-0.0396366		-0.094264		0.699038	5.13e-07	137.81	1	71.344	71.3439	749.34	0.37786	VATFNSIKELNERWRSLQQLAEERSQLLGSA	_WRS(ph)LQ(de)Q(de)LAEER_	CaMKII_group;PAK_group	CAMK2A;PAK1	0.1491	0.3654	1.69845	CAMK	PIM1;PIM2;PSKH1;Trad;TSSK2;TSSK3;VACAMKL	1.89	1.63;1.63;1.63;1.63;1.63;1.63;1.63	14-3-3 domain binding motif;Calmodulin-dependent protein kinase II substrate motif;MAPKAPK2 kinase substrate motif;Phosphorylase kinase substrate motif;PKA kinase substrate motif;PKC kinase substrate motif
A6NG51	1031	A6NG51	1031	A6NG51;Q13813	1031;1031	Spectrin alpha chain, brain	SPTAN1;SPTAN1	S			0.564329		1.314	0.939151		-0.094264		0.699038	1.79e-18	156.37	0.965976	156.37	14.5318	869.104	-0.64999	VPAAYVKKLDPAQSASRENLLEEQGSIALRQ	_KLDPAQSAS(ph)RENLLEEQGSIALR_	PKC_group	PRKCA;PRKCB	0.1573	0.4849	1.2002					Casein kinase II substrate motif
A6NHB5	1049	A6NHB5	1049	A6NHB5;Q14202;A6NHN7	1049;1047;1049	Zinc finger MYM-type protein 3	ZMYM3;ZMYM3;ZMYM3	S			-1.78672			-1.78672				1	0.00579749	64.64	0.811257	64.64	6.36624	565.749	-2.3955	PRTMRKGQKRLVLSESCSRDSMSSQPSCTGL	_LVLSES(ph)CSR_	PKC_group	PRKCA;PRKCB	0.1577	0.3128	1.19835					b-Adrenergic Receptor kinase substrate motif;Casein kinase II substrate motif
A6NHB5	466	A6NHB5	466	A6NHB5;Q14202;A6NHN7;A6NL54	466;464;466;466	Zinc finger MYM-type protein 3	ZMYM3;ZMYM3;ZMYM3;ZMYM3	S			0.143916	0.194465	-0.0698153	0.143916				1	6.74e-16	151.41	0.996703	102.37	24.8041	602.608	1.0312	NCCDQCGAYIYTKTGSPGPELLFHEGQQKRF	_TGS(ph)PGPELLFHEGQ(de)QK_	CK1_group;MAPK3_MAPK1_MAPK7_NLK_group	CSNK1A1;MAPK1;MAPK3	0.2803	0.227	1.7579					ERK1,2 kinase substrate motif;GSK-3, ERK1, ERK2, CDK5 substrate motif;PKA kinase substrate motif;PKC kinase substrate motif;WW domain binding motif
A6NHM7	286	A6NHM7	286	A6NHM7;Q7Z5H3;A6NJ38;D6R9V6	286;395;236;228	Rho GTPase-activating protein 22	ARHGAP22;ARHGAP22;ARHGAP22;ARHGAP22	S			0.0854246	0.161307	0.042084	0.0854247				1	0.000163362	92.307	0.990341	92.307	23.1189	713.851	0.62645	QGEPGGPGLPAHRTSSLDGAAVAVLSRTAPT	_TSS(ph)LDGAAVAVLSR_	CaMKII_group;PAK_group	CAMK2A;PAK1	0.1702	0.31135	1.81575					14-3-3 domain binding motif;Calmodulin-dependent protein kinase II substrate motif;G protein-coupled receptor kinase 1 substrate motif;MDC1 BRCT domain binding motif;Phosphorylase kinase substrate motif;PKA kinase substrate motif;PKC kinase substrate motif;Plk1 PBD domain binding motif
A6NI72	346	A6NI72	346	A6NI72;P14598;A8MVU1	346;345;321	Putative neutrophil cytosol factor 1B;Neutrophil cytosol factor 1;Putative neutrophil cytosol factor 1C	NCF1B;NCF1;NCF1C	S			-0.018162	-0.222498	-0.174345	-0.0847927				1	2.27e-84	263.15	1	263.15	84.0512	780.341	0.37047	RFLQQRRRQARPGPQSPGSPLEEERQTQRSK	_PGPQS(ph)PGSPLEEER_	HIPK1_HIPK2_group;JNK_group;MAPK3_MAPK1_MAPK7_NLK_group;PAK_group;PKB_group;PKC_group	AKT1;HIPK2;MAPK1;MAPK3;MAPK8;PAK1;PRKCD;PRKCZ	0.04515	0.719	2.02235					Casein kinase I substrate motif;Casein kinase II substrate motif;ERK1,2 kinase substrate motif;G protein-coupled receptor kinase 1 substrate motif;GSK-3, ERK1, ERK2, CDK5 substrate motif;WW domain binding motif
A6NI72	349	A6NI72	349	A6NI72;P14598;A8MVU1	349;348;324	Putative neutrophil cytosol factor 1B;Neutrophil cytosol factor 1;Putative neutrophil cytosol factor 1C	NCF1B;NCF1;NCF1C	S			-0.0437946	-0.0705575	-0.148417	-0.0705574				1	1.24e-23	178.23	0.999877	178.23	39.1129	780.341	0.28752	QQRRRQARPGPQSPGSPLEEERQTQRSKPQP	_PGPQSPGS(ph)PLEEER_	CDK2_CDK3_CDK1_CDK5_group;CK2_group;DNAPK;HIPK1_HIPK2_group;JNK_group;MAPK3_MAPK1_MAPK7_NLK_group;PKC_group	CDK5;CSNK2A1;CSNK2A2;HIPK2;HYRC;MAPK3;MAPK8;PRKCD;PRKCZ	0.0638	0.548	1.903					Casein kinase II substrate motif;ERK1,2 kinase substrate motif;GSK-3, ERK1, ERK2, CDK5 substrate motif;WW domain binding motif
A6NIW2	306	A6NIW2	306	A6NIW2;Q5JSL3	306;306	Dedicator of cytokinesis protein 11	DOCK11;DOCK11	S		+	-1.12756	-1.62781	-1.02615	-1.32699				1	0.00044463	94.023	1	94.023	94.0232	607.268	0.23244	DDETSSQGKAENIMASLERSMHPELMKYGRE	_AENIMAS(ph)LER_	PKC_group	PRKCA;PRKCB	0.2135	0.30975	1.60455					Casein kinase I substrate motif;Casein kinase II substrate motif;G protein-coupled receptor kinase 1 substrate motif;GSK3 kinase substrate motif
A6NIW2	1237	A6NIW2	1237	A6NIW2;Q5JSL3	1237;1237	Dedicator of cytokinesis protein 11	DOCK11;DOCK11	S			-0.228436			-0.228436				1	0.000108044	71.068	0.682874	66.01	3.34428	929.074	-1.1601	AYGSFQNGHGIKREDSRGSLIPEGATGFPDQ	_EDS(ph)RGSLIPEGATGFPDQGNTGENTR_	CaMKII_group	CAMK2A	0.1613	0.169	1.9017					14-3-3 domain binding motif;AMP-activated protein kinase substrate motif;b-Adrenergic Receptor kinase substrate motif;Calmodulin-dependent protein kinase I substrate motif;Calmodulin-dependent protein kinase II substrate motif;Calmodulin-dependent protein kinase IV substrate motif;Casein kinase I substrate motif;Casein kinase II substrate motif;Chk1 kinase substrate motif;PKA kinase substrate mot…
A6NIW2	1240	A6NIW2	1240	A6NIW2;Q5JSL3	1240;1240	Dedicator of cytokinesis protein 11	DOCK11;DOCK11	S				0.148869		0.148869				1	0.000108044	71.068	0.583772	63.776	1.47389	929.074	-0.81404	SFQNGHGIKREDSRGSLIPEGATGFPDQGNT	_EDSRGS(ph)LIPEGATGFPDQGNTGENTR_	CK1_group;PAK_group;PKC_group	CSNK1A1;PAK1;PRKCA;PRKCB	0.18655	0.30975	1.42445					PKA kinase substrate motif;PKC kinase substrate motif
A6NIW2	437	A6NIW2	437	A6NIW2;Q5JSL3	437;437	Dedicator of cytokinesis protein 11	DOCK11;DOCK11	S			0.190046			0.190046				1	7.41e-05	102.45	0.591249	102.45	1.60342	937.406	0.75127	PSVREMLWGSSTQLASDGSPKGSSPESYIHG	_EMLWGSSTQLAS(ph)DGSPK_										Casein kinase I substrate motif;Casein kinase II substrate motif;G protein-coupled receptor kinase 1 substrate motif
A6NIW2	12	A6NIW2	12	A6NIW2;Q5JSL3	12;12	Dedicator of cytokinesis protein 11	DOCK11;DOCK11	S			-0.0366738	0.136191	-0.156	-0.0366739				1	4.33e-08	130.29	0.999997	120.7	55.3303	460.245	-0.37262	____MAEVRKFTKRLSKPGTAAELRQSVSEA	_RLS(ph)KPGTAAELR_	PAK_group;PKA_group;PKC_group	PAK1;PRKACA;PRKCA;PRKCB;PRKCZ	0.2383	0.3822	1.3186					Calmodulin-dependent protein kinase II substrate motif;G protein-coupled receptor kinase 1 substrate motif;PAK2 kinase substrate motif;PKA kinase substrate motif;PKC kinase substrate motif
A6NJG2	20	A6NJG2	20	A6NJG2	20	Ankyrin repeat domain-containing protein SOWAHD	SOWAHD	S			-0.679827		-0.205713	-0.442771				1	3.85e-59	244.08	0.572991	244.08	3.28879	740.364	-0.46205	GGAANRAPTASLAPTSQSLRCAPQPRPSRAD	_APTASLAPTS(ph)QSLR_										ATM kinase substrate motif;Casein kinase II substrate motif;DNA dependent Protein kinase substrate motif
A6NJG2	67	A6NJG2	67	A6NJG2	67	Ankyrin repeat domain-containing protein SOWAHD	SOWAHD	S			-0.0422785		-0.0992471	-0.0992472				1	0.015644	46.833	0.978707	46.833	17.3566	616.601	-0.0052716	REHPFPGTLMHSAAGSGRRRGALRELLGLQR	_EHPFPGTLM(ox)HSAAGS(ph)GR_										MAPKAPK2 kinase substrate motif;PKA kinase substrate motif;PKC kinase substrate motif
A6NJG2	19	A6NJG2	19	A6NJG2	19	Ankyrin repeat domain-containing protein SOWAHD	SOWAHD	T				-0.88686	-0.707925	-0.797388				1	8.31e-47	226.25	0.680868	226.25	6.30122	740.364	-0.28917	LGGAANRAPTASLAPTSQSLRCAPQPRPSRA	_APTASLAPT(ph)SQSLR_										Casein kinase I substrate motif;Casein kinase II substrate motif;DNA dependent Protein kinase substrate motif;MAPKAPK2 kinase substrate motif
A6NJZ9	115	A6NJZ9	115	A6NJZ9;Q8WTT2	115;115	Nucleolar complex protein 3 homolog	NOC3L;NOC3L	S			0.733094	0.314523	0.427928	0.427928				1	0.000149877	96.464	0.977547	90.412	16.4849	625.277	0.63292	MKDLGQRVSFLTRDLSSSEPVHAKKRKHERI	_DLS(ph)SSEPVHAK_	CaMKII_group;PAK_group	CAMK2A;PAK1	0.1126	0.14515	1.45645					14-3-3 domain binding motif;Calmodulin-dependent protein kinase II substrate motif;Calmodulin-dependent protein kinase IV substrate motif;Casein kinase II substrate motif;Chk1 kinase substrate motif;G protein-coupled receptor kinase 1 substrate motif;PKA kinase substrate motif;PKC kinase substrate motif
A6NJZ9	787	A6NJZ9	787	A6NJZ9;Q8WTT2	787;787	Nucleolar complex protein 3 homolog	NOC3L;NOC3L	S			0.267596	0.14978		0.208642				1	2.98e-16	150.7	0.999484	150.7	33.047	877.382	0.30729	LNQLIKRYSSEVATESPLDFTKYLKTSLH__	_YSSEVATES(ph)PLDFTK_	MAPK3_MAPK1_MAPK7_NLK_group	MAPK3	0.2274	0.1578	1.6309					b-Adrenergic Receptor kinase substrate motif;Casein kinase II substrate motif;ERK1,2 kinase substrate motif;GSK-3, ERK1, ERK2, CDK5 substrate motif;Pyruvate dehydrogenase kinase substrate motif;WW domain binding motif
A6NKF1	402	A6NKF1	402	A6NKF1;F8WC89	402;356	SAC3 domain-containing protein 1	SAC3D1;SAC3D1	S			0.0535284	0.0192037	0.0862402	0.0589399				1	4.74e-118	250.82	0.999992	226.4	50.9167	1221.01	0.14732	VVMAEEEDEGTDRPGSPA_____________	_TLEEVVMAEEEDEGTDRPGS(ph)PA_	MAPK3_MAPK1_MAPK7_NLK_group	MAPK3	0.1324	0.3703	1.0413					14-3-3 domain binding motif;Calmodulin-dependent protein kinase II substrate motif;ERK1,2 kinase substrate motif;GSK-3, ERK1, ERK2, CDK5 substrate motif;PKA kinase substrate motif;PKC kinase substrate motif;WW domain binding motif
A6NMQ1	215	A6NMQ1	215	A6NMQ1;P09884	215;209	DNA polymerase;DNA polymerase alpha catalytic subunit	POLA1;POLA1	S	+		0.757365	0.69439	0.802317	0.757365		-0.0411945		0.687809	0.000631811	112.11	0.999997	112.11	55.6734	405.199	1.8298	FSVHTATAVPSGKIASPVSRKEPPLTPVPLK	_IAS(ph)PVSR_	CDK2_CDK3_CDK1_CDK5_group	CDK1;CDK2	0.3134	0.979	32.8156					Casein kinase I substrate motif;Casein kinase II substrate motif;ERK1,2 kinase substrate motif;GSK-3, ERK1, ERK2, CDK5 substrate motif;PKA kinase substrate motif;PKC kinase substrate motif;WW domain binding motif
A6NMQ1	192	A6NMQ1	192	A6NMQ1;P09884	192;186	DNA polymerase;DNA polymerase alpha catalytic subunit	POLA1;POLA1	S			0.529671	-0.19441	-0.138045	-0.138045		-0.0411945		0.687809	3.16e-08	129.27	0.999998	129.27	57.1862	702.34	-0.38306	PQITPPPVMILKKKRSIGASPNPFSVHTATA	_S(ph)IGASPNPFSVHTATAVPSGK_	PAK_group	PAK1	0.1568	0.2983	1.3518					Calmodulin-dependent protein kinase II substrate motif;Chk1 kinase substrate motif;G protein-coupled receptor kinase 1 substrate motif;GSK3 kinase substrate motif;Phosphorylase kinase substrate motif;Pim1 kinase substrate sequence;PKA kinase substrate motif;PKC kinase substrate motif
A6PVT6	78	A6PVT6	78	A6PVT6;A8MSQ5;F8WEA4;Q9NR82	78;78;78;78	Potassium voltage-gated channel subfamily KQT member 5	KCNQ5;KCNQ5;KCNQ5;KCNQ5	S			-0.0905572	0.0311129	0.0465608	0.0311128				1	0.00410961	58.024	0.999995	58.024	52.6335	719.844	-2.7889	TRAATLGGGGGGLRESRRGKQGARMSLLGKP	_AATLGGGGGGLRES(ph)R_	PAK_group;PKC_group	PAK1;PRKCA;PRKCB;PRKCZ	0.4915	0.23515	1.8694					b-Adrenergic Receptor kinase substrate motif;PKA kinase substrate motif;PKC kinase substrate motif
A6PVT6	921	A6PVT6	921	A6PVT6;A8MSQ5;F8WEA4;Q9NR82	921;903;902;902	Potassium voltage-gated channel subfamily KQT member 5	KCNQ5;KCNQ5;KCNQ5;KCNQ5	S			-0.383341	-0.0287784	-0.0780763	-0.0780763				1	3.11e-06	99.569	0.945002	86.455	13.2468	730.83	0.20665	DAAPQPAREAAFASDSLRTGRSRSSQSICKA	_EAAFASDS(ph)LRTGR_	PKC_group	PRKCA;PRKCB;PRKCZ	0.395	0.2545	2.4297					b-Adrenergic Receptor kinase substrate motif;Casein kinase I substrate motif;Casein kinase II substrate motif;PKA kinase substrate motif;PKC kinase substrate motif
A6PVT6	476	A6PVT6	476	A6PVT6;A8MSQ5;F8WEA4;Q9NR82;H0Y3Z0	476;458;457;457;49	Potassium voltage-gated channel subfamily KQT member 5	KCNQ5;KCNQ5;KCNQ5;KCNQ5;KCNQ5	S			0.251931	0.0676387	0.349592	0.251931				1	1.34e-99	287.48	0.999617	144.92	34.1699	813.872	0.18905	VGDRRSPSTDITAEGSPTKVQKSWSFNDRTR	_RSPSTDITAEGS(ph)PTK_	MAPK3_MAPK1_MAPK7_NLK_group	MAPK3	0.1527	0.2104	1.3911					Casein kinase II substrate motif;Cdc2 kinase substrate motif;CDK kinase substrate motif;CDK1,2,4,6 kinase substrate motif;ERK1,2 kinase substrate motif;GSK-3, ERK1, ERK2, CDK5 substrate motif;WW domain binding motif
A6PVT6	485	A6PVT6	485	A6PVT6;A8MSQ5;F8WEA4;Q9NR82;H0Y3Z0;P56696;H0Y6N7	485;467;466;466;58;484;345	Potassium voltage-gated channel subfamily KQT member 5;Potassium voltage-gated channel subfamily KQT member 4	KCNQ5;KCNQ5;KCNQ5;KCNQ5;KCNQ5;KCNQ4;KCNQ4	S			0.0743684	0.0821575		0.0783366				1	0.00430711	108.98	0.999997	108.98	55.484	496.187	0.26654	DITAEGSPTKVQKSWSFNDRTRFRPSLRLKS	_SWS(ph)FNDR_	PAK_group;PKC_group	PAK1;PRKCA;PRKCB;PRKCZ	0.2898	0.23515	1.3273					Calmodulin-dependent protein kinase II substrate motif;Casein kinase II substrate motif;Chk1 kinase substrate motif;PKA kinase substrate motif;PKC kinase substrate motif;Pyruvate dehydrogenase kinase substrate motif
A7KAX9	871	A7KAX9	871	A7KAX9;G3V174	871;797	Rho GTPase-activating protein 32	ARHGAP32;ARHGAP32	S			0.126973	0.263155		0.195096				1	0.00040722	83.849	0.898776	83.849	9.48477	895.418	-0.84228	SPLQEKLSPFFTLDLSPTEDKSSKPSSFTEK	_LSPFFTLDLS(ph)PTEDK_	MAPK3_MAPK1_MAPK7_NLK_group	MAPK3	0.2242	0.3867	1.8993					Casein kinase II substrate motif;ERK1,2 kinase substrate motif;GSK-3, ERK1, ERK2, CDK5 substrate motif;WW domain binding motif
A7KAX9	706	A7KAX9	706	A7KAX9;G3V174	706;632	Rho GTPase-activating protein 32	ARHGAP32;ARHGAP32	S			0.168642		-0.40194	-0.116661				1	0.00029787	66.017	0.706356	61.602	5.13406	680.976	0.15385	ALKGGRAEGTLRSAKSEESLTSLHAVDGDSK	_SAKS(ph)EESLTSLHAVDGDSK_										AMP-activated protein kinase substrate motif;Casein kinase I substrate motif;Casein kinase II substrate motif;G protein-coupled receptor kinase 1 substrate motif
A7KAX9	709	A7KAX9	709	A7KAX9;G3V174	709;635	Rho GTPase-activating protein 32	ARHGAP32;ARHGAP32	S										1	0.000390306	57.147	0.47819	57.147	1.67756	680.976	0.31754	GGRAEGTLRSAKSEESLTSLHAVDGDSKLFR	_SAKSEES(ph)LTSLHAVDGDSK_										b-Adrenergic Receptor kinase substrate motif;Casein kinase I substrate motif;Casein kinase II substrate motif;PKA kinase substrate motif
A7KAX9	892	A7KAX9	892	A7KAX9;G3V174	892;818	Rho GTPase-activating protein 32	ARHGAP32;ARHGAP32	S			-0.0147473	0.0350608	-0.219623	-0.0147473				1	0.0123328	63.408	0.9999	63.408	39.9797	495.738	-0.3004	SSKPSSFTEKVVYAFSPKIGRKLSKSPSMSI	_VVYAFS(ph)PK_	CDK2_CDK3_CDK1_CDK5_group;PKC_group	CDK5;PRKCB	0.2036	0.3815	1.08945					ERK1,2 kinase substrate motif;Growth associated histone HI kinase substrate motif;GSK-3, ERK1, ERK2, CDK5 substrate motif;PKA kinase substrate motif;PKC kinase substrate motif;WW domain binding motif
A7MCY6	504	A7MCY6	504	A7MCY6	504	TANK-binding kinase 1-binding protein 1	TBKBP1	S			-0.326914			-0.326914				1	0.000470022	75.55	0.999991	75.55	50.6562	900.427	0.1358	PRAYGSELYGPGRPLSPRRAFEGIRLRFEKQ	_AYGSELYGPGRPLS(ph)PR_	IKKalpha_IKKbeta_group;MAPK3_MAPK1_MAPK7_NLK_group;PKC_group	CHUK;MAPK1;MAPK3;PRKCB	0.21025	0.26555	1.6767					14-3-3 domain binding motif;Calmodulin-dependent protein kinase II substrate motif;Cdc2 kinase substrate motif;CDK kinase substrate motif;CDK1,2,4,6 kinase substrate motif;CDK4 kinase substrate motif;CLK1 kinase substrate motif;ERK1,2 kinase substrate motif;G protein-coupled receptor kinase 1 substrate motif;Growth associated histone HI kinase substrate motif;GSK-3, ERK1, ERK2, CDK5 substrate mot…
A8CG34	370	A8CG34	370	A8CG34	370	Nuclear envelope pore membrane protein POM 121C	POM121C	S										1	0.00530469	49.25	0.372211	43.162	0.356287	1061.92	-1.0923	SQSSDDHLNKRSRSSSMSSLTGAYTSGIPSS	_SSS(ph)MS(ph)SLTGAYTSGIPSSSR_	CaMKII_group;PAK_group	CAMK2A;PAK1	0.154	0.07045	1.44075					14-3-3 domain binding motif;Akt kinase substrate motif;Calmodulin-dependent protein kinase II substrate motif;Casein kinase I substrate motif;Casein kinase II substrate motif;MAPKAPK1 kinase substrate motif;MAPKAPK2 kinase substrate motif;MDC1 BRCT domain binding motif;p70 Ribosomal S6 kinase substrate motif;PKA kinase substrate motif;PKC kinase substrate motif;Plk1 PBD domain binding motif
A8CG34	372	A8CG34	372	A8CG34	372	Nuclear envelope pore membrane protein POM 121C	POM121C	S										1	0.0112689	43.162	0.443867	43.162	0.356287	1061.92	-1.0923	SSDDHLNKRSRSSSMSSLTGAYTSGIPSSSR	_SSS(ph)MS(ph)SLTGAYTSGIPSSSR_	CK1_group;PAK_group	CSNK1A1;PAK1	0.1528	0.0934	1.35905					Casein kinase I substrate motif;Casein kinase II substrate motif;MAPKAPK2 kinase substrate motif
A8CG34	373	A8CG34	373	A8CG34	373	Nuclear envelope pore membrane protein POM 121C	POM121C	S										1	0.00530469	49.25	0.684058	49.25	6.44407	1061.92	-0.035846	SDDHLNKRSRSSSMSSLTGAYTSGIPSSSRN	_SSS(ph)MSS(ph)LTGAYTSGIPSSSR_	CK1_group;PKC_group	CSNK1A1;PRKCB	0.1427	0.08675	1.3423					Casein kinase II substrate motif;G protein-coupled receptor kinase 1 substrate motif;MAPKAPK2 kinase substrate motif;MDC1 BRCT domain binding motif;Plk1 PBD domain binding motif
A8MPP1	591	A8MPP1	591	A8MPP1	591	Putative ATP-dependent RNA helicase DDX11-like protein 8	DDX11L8	S			-0.0694367	-0.00569543	0.334568	-0.0680296				1	0.00445037	65.408	0.999891	56.205	40.66	403.832	0.20711	TTANQDGRVILSRQGSLSESTLKFLLLNPAV	_QGS(ph)LS(ph)ESTLK_	CaMKII_group;PAK_group	CAMK2A;PAK1	0.1481	0.0291	1.59625					14-3-3 domain binding motif;Calmodulin-dependent protein kinase II alpha substrate motif;Calmodulin-dependent protein kinase II substrate motif;Calmodulin-dependent protein kinase IV substrate motif;Casein kinase II substrate motif;Chk1 kinase substrate motif;G protein-coupled receptor kinase 1 substrate motif;GSK3 kinase substrate motif;MAPKAPK2 kinase substrate motif;Phosphorylase kinase substr…
A8MPP1	593	A8MPP1	593	A8MPP1	593	Putative ATP-dependent RNA helicase DDX11-like protein 8	DDX11L8	S			-0.12699		0.334568	-0.0680296				1	0.00445037	65.408	0.534122	65.408	2.95357	605.244	-0.72936	ANQDGRVILSRQGSLSESTLKFLLLNPAVHF	_QGS(ph)LS(ph)ESTLK_										Casein kinase I substrate motif;Casein kinase II substrate motif;G protein-coupled receptor kinase 1 substrate motif
A8MQ45	271	A8MQ45	271	A8MQ45	271		JAM2	Y			-0.113146	-0.385959	0.0603242	-0.113146				1	0.0321725	40.025	0.981125	40.025	20.3559	751.753	-1.7954	LGVCYAQRKGYFSSKYMFMKSNSSSKATTMS	_Y(ph)M(ox)FM(ox)KSN(de)SSS(ph)K_	Eph_group	EPHB1	0.0482	0.558	1.454					Abl kinase substrate motif;Insulin receptor kinase substrate motif;PI3 kinase p85 SH2 domain binding motif;Src and Abl SH2 domain binding motif;Src kinase substrate motif
A8MT70	560	A8MT70	560	A8MT70;F2Z370	560;531	Zinc finger B-box domain-containing protein 1	ZBBX;ZBBX	Y			-0.0709665	-0.147554	-0.100036	-0.100036				1	0.0277539	45.257	0.729633	45.257	1.30156	1021.45	-1.9977	KLSQDIKESLELSNLYKRPSFEESKTTKSSL	_LSQ(de)DIKES(ph)LELSN(de)LY(ph)K_										ALK kinase substrate motif;Crk SH2 domain binding motif;RasGAP C-terminal SH2 domain binding motif;Src, Fyn, Lck, Fgr, Abl, Crk, Nck SH2 domain binding motif
A8MTK4	476	A8MTK4	476	A8MTK4;Q8TDR0	476;476	TRAF3-interacting protein 1	TRAF3IP1;TRAF3IP1	S			-0.028955			-0.028955				1	2.94e-07	119.68	1	119.68	119.68	780.321	-0.8258	PGSARPAPPRVKRQDSMEALQMDRSGSGKTV	_RQDS(ph)MEALQMDR_	CaMKII_group	CAMK2A	0.1634	0.28	1.9017					14-3-3 domain binding motif;AMP-activated protein kinase substrate motif;b-Adrenergic Receptor kinase substrate motif;Calmodulin-dependent protein kinase I substrate motif;Calmodulin-dependent protein kinase II alpha substrate motif;Calmodulin-dependent protein kinase II substrate motif;Calmodulin-dependent protein kinase IV substrate motif;Casein kinase II substrate motif;Chk1 kinase substrate m…
A8MVS5	213	A8MVS5	213	A8MVS5	213	Protein HIDE1	HIDE1	S										1	0.000217841	71.601	0.400952	64.589	0.610291	767.998	-1.529	TTATPSNSRTRKRPTSTSSSPETPEFSTFRA	_KRPTS(ph)T(ph)SSSPETPEFSTFR_										14-3-3 domain binding motif;Akt kinase substrate motif;Calmodulin-dependent protein kinase II substrate motif;Casein kinase I substrate motif;Casein kinase II substrate motif;G protein-coupled receptor kinase 1 substrate motif;GSK3 kinase substrate motif;MAPKAPK1 kinase substrate motif;PKA kinase substrate motif;PKC kinase substrate motif
A8MVS5	215	A8MVS5	215	A8MVS5	215	Protein HIDE1	HIDE1	S										1	5.41e-05	91.128	0.454786	84.68	2.79589	767.998	0.43131	ATPSNSRTRKRPTSTSSSPETPEFSTFRACQ	_KRPTSTS(ph)S(ph)SPETPEFSTFR_										Casein kinase II substrate motif
A8MVS5	216	A8MVS5	216	A8MVS5	216	Protein HIDE1	HIDE1	S										1	5.41e-05	84.68	0.435851	84.68	2.11991	767.998	0.43131	TPSNSRTRKRPTSTSSSPETPEFSTFRACQ_	_KRPTSTS(ph)S(ph)SPETPEFSTFR_										Casein kinase II substrate motif;G protein-coupled receptor kinase 1 substrate motif;MDC1 BRCT domain binding motif;Plk1 PBD domain binding motif
A8MVS5	217	A8MVS5	217	A8MVS5	217	Protein HIDE1	HIDE1	S										1	0.000103293	83.039	0.387302	49.618	0	767.998	0.74145	PSNSRTRKRPTSTSSSPETPEFSTFRACQ__	_KRPTSTS(ph)S(ph)SPETPEFSTFR_										Casein kinase I substrate motif;Casein kinase II substrate motif;ERK1,2 kinase substrate motif;G protein-coupled receptor kinase 1 substrate motif;GSK-3, ERK1, ERK2, CDK5 substrate motif;MAPKAPK2 kinase substrate motif;MDC1 BRCT domain binding motif;Plk1 PBD domain binding motif;WW domain binding motif
A8MVS5	212	A8MVS5	212	A8MVS5	212	Protein HIDE1	HIDE1	T										1	0.000217841	71.601	0.37174	31.462	0	1151.49	-0.041756	GTTATPSNSRTRKRPTSTSSSPETPEFSTFR	_KRPT(ph)S(ph)TSSSPETPEFSTFR_										Casein kinase I substrate motif;Casein kinase II substrate motif;DNA dependent Protein kinase substrate motif;G protein-coupled receptor kinase 1 substrate motif;PAK2 kinase substrate motif;Pim1 kinase substrate sequence;PKA kinase substrate motif;PKC kinase substrate motif
A8MVS5	214	A8MVS5	214	A8MVS5	214	Protein HIDE1	HIDE1	T										1	7.66e-05	91.128	0.465505	91.128	1.76268	767.998	0.73063	TATPSNSRTRKRPTSTSSSPETPEFSTFRAC	_KRPTST(ph)S(ph)SSPETPEFSTFR_										Casein kinase I substrate motif;Casein kinase II substrate motif;G protein-coupled receptor kinase 1 substrate motif;MDC1 BRCT domain binding motif;Plk1 PBD domain binding motif
A8MVX0	521	A8MVX0	521	A8MVX0	521	Rho guanine nucleotide exchange factor 33	ARHGEF33	S			2.04236			2.04236				1	0.000807974	75.548	0.999998	75.548	67.3267	903.352	2.9784	SSGPAITHLMPPVKKSQQQQSLMESMQPGKP	_S(ph)QQ(de)Q(de)Q(de)SLM(ox)ESMQPGK_										ATM kinase substrate motif;DNA dependent Protein kinase substrate motif;PKA kinase substrate motif;PKC kinase substrate motif
A8MWD9	66	A8MWD9	66	A8MWD9;P62308;F5H013;Q49AN9	66;66;58;54	Small nuclear ribonucleoprotein G-like protein;Small nuclear ribonucleoprotein G	SNRPG;SNRPG;SNRPG	S			0.105812			0.105812		-0.0459228		0.651598	0.0018134	70.281	1	70.281	70.2805	713.344	0.60025	SGQQKNIGMVEIRGNSIIMLEALERV_____	_GNS(ph)IIMLEALER_	CaMKII_group;PAK_group	CAMK2A;PAK1	0.1472	0.18335	1.59625					14-3-3 domain binding motif;AMP-activated protein kinase substrate motif;Calmodulin-dependent protein kinase II substrate motif;HMGCoA Reductase kinase substrate motif;Phosphorylase kinase substrate motif;PKA kinase substrate motif;PKC kinase substrate motif
A8MWX3	230	A8MWX3	230	A8MWX3;A8K0Z3;Q6VEQ5;C4AMC7;Q9NQA3;H3BV49	230;217;217;215;199;218	Putative WAS protein family homolog 4;WAS protein family homolog 1;WAS protein family homolog 2;Putative WAS protein family homolog 3;WAS protein family homolog 6	WASH4P;WASH1;WASH2P;WASH3P;WASH6P;WASH4P	S			-0.00914677			-0.00914677				1	0.00544798	60.628	0.5	60.628	0	585.794	-1.5664	MLGAETEEKLFDAPLSISKREQLEQQVPENY	_LFDAPLS(ph)ISK_										Casein kinase II substrate motif
A8MWX3	232	A8MWX3	232	A8MWX3;A8K0Z3;Q6VEQ5;C4AMC7;Q9NQA3;H3BV49	232;219;219;217;201;220	Putative WAS protein family homolog 4;WAS protein family homolog 1;WAS protein family homolog 2;Putative WAS protein family homolog 3;WAS protein family homolog 6	WASH4P;WASH1;WASH2P;WASH3P;WASH6P;WASH4P	S			-0.00914677			-0.00914677				1	0.00544798	60.628	0.5	60.628	0	585.794	-1.5664	GAETEEKLFDAPLSISKREQLEQQVPENYFY	_LFDAPLS(ph)ISK_										Casein kinase II substrate motif;PKA kinase substrate motif;PKC kinase substrate motif
A8MXB7	93	A8MXB7	93	A8MXB7;Q9Y343;H0YA25	93;60;40	Sorting nexin-24	SNX24;SNX24;SNX24	S			-0.00807279	-0.034116	0.0496307	-0.00807278				1	0.0137194	70.256	0.999969	70.256	45.1185	426.199	0.046041	LHKKLKKCIKTPEIPSKHVRNWVPKVLEQRR	_TPEIPS(ph)K_	PKC_group	PRKCA;PRKCB	0.2027	0.1061	1.4216					Casein kinase I substrate motif;DNA dependent Protein kinase substrate motif
A8MXP9	188	A8MXP9	188	A8MXP9;P43243;D6REM6;D6R991	188;188;188;188	Matrin-3	MATR3;MATR3;MATR3;MATR3	S			0.275245	0.174151	0.452174	0.244522		-0.0816901		0.407902	3.95e-43	202.98	0.999967	202.98	44.7797	866.717	-0.027469	VPRDDWEEKRHFRRDSFDDRGPSLNPVLDYD	_RDS(ph)FDDRGPSLNPVLDYDHGSR_	CaMKII_group;PAK_group;PKA_group;PKC_group	CAMK2A;PAK1;PRKACA;PRKCA;PRKCB;PRKCE	0.1894	0.1735	1.47585					14-3-3 domain binding motif;b-Adrenergic Receptor kinase substrate motif;Calmodulin-dependent protein kinase II substrate motif;Casein kinase II substrate motif;PAK2 kinase substrate motif;PKA kinase substrate motif;PKC epsilon kinase substrate motif;PKC kinase substrate motif;Pyruvate dehydrogenase kinase substrate motif
A8MXP9	164	A8MXP9	164	A8MXP9;P43243;D6REM6;D6R991	164;164;164;164	Matrin-3	MATR3;MATR3;MATR3;MATR3	S			-0.445362	-0.523981		-0.523981		-0.0816901		0.407902	0.00119663	84.605	0.990913	78.548	20.376	578.761	0.87587	RTEEGPTLSYGRDGRSATREPPYRVPRDDWE	_S(ph)ATREPPYR_	PKC_group	PRKCA;PRKCB;PRKCE	0.2236	0.2391	2.2358					Casein kinase I substrate motif;Casein kinase II substrate motif
A8MXP9	4	A8MXP9	4	A8MXP9;P43243;D6REM6;D6R991;D6R8Z5;D6REK4;D6RCM3;D6RBS2;D6R9F3;D6RB45	4;4;4;4;4;4;4;4;4;4	Matrin-3	MATR3;MATR3;MATR3;MATR3;MATR3;MATR3;MATR3;MATR3;MATR3;MATR3	S			-0.744584	-1.82465		-1.28462		-0.0816901		0.407902	2.55e-06	115.06	0.998683	105.99	28.7996	688.814	-0.73854	____________MSKSFQQSSLSRDSQGHGR	_(ac)SKS(ph)FQQSSLSR_	PKC_group	PRKCA;PRKCB;PRKCE;PRKCZ	0.2481	0.21115	1.86225					G protein-coupled receptor kinase 1 substrate motif;GSK3 kinase substrate motif
A8MXP9	9	A8MXP9	9	A8MXP9;P43243;D6REM6;D6R991;D6R8Z5;D6REK4;D6RCM3;D6RBS2;D6R9F3;D6RB45	9;9;9;9;9;9;9;9;9;9	Matrin-3	MATR3;MATR3;MATR3;MATR3;MATR3;MATR3;MATR3;MATR3;MATR3;MATR3	S			0.621243	0.585347		0.621243		-0.0816901		0.407902	0.00113516	84.507	0.783735	84.507	6.76322	560.245	1.7233	_______MSKSFQQSSLSRDSQGHGRDLSAA	_SFQQSS(ph)LSR_	PKC_group	PRKCA;PRKCB;PRKCE;PRKCZ	0.2437	0.21115	1.8558					Casein kinase II substrate motif;MDC1 BRCT domain binding motif;Plk1 PBD domain binding motif
A8MXP9	598	A8MXP9	598	A8MXP9;P43243;D6REM6;B3KM87	598;598;598;260	Matrin-3	MATR3;MATR3;MATR3;MATR3	S			-0.0650231	-0.0769802	-0.0614357	-0.0769802		-0.0816901		0.407902	1.93e-29	186.15	0.999969	182.76	45.151	842.829	-0.043673	GIDLLKKDKSRKRSYSPDGKESPSDKKSKTD	_SYS(ph)PDGKES(ph)PSDKK_	PAK_group	PAK1	0.105	0.1663	1.1473					14-3-3 domain binding motif;Akt kinase substrate motif;AMP-activated protein kinase 2 substrate motif;Calmodulin-dependent protein kinase II substrate motif;ERK1,2 kinase substrate motif;GSK-3, ERK1, ERK2, CDK5 substrate motif;MAPKAPK1 kinase substrate motif;PKA kinase substrate motif;PKC kinase substrate motif;WW domain binding motif
A8MXP9	604	A8MXP9	604	A8MXP9;P43243;D6REM6;B3KM87	604;604;604;266	Matrin-3	MATR3;MATR3;MATR3;MATR3	S			-0.0336877	0.200504	0.197488	-0.0336877		-0.0816901		0.407902	1.93e-29	186.15	0.998131	182.76	27.2751	842.829	-0.043673	KDKSRKRSYSPDGKESPSDKKSKTDGSQKTE	_SYS(ph)PDGKES(ph)PSDKK_	MAPK3_MAPK1_MAPK7_NLK_group	MAPK3	0.1881	0.2917	1.4386					b-Adrenergic Receptor kinase substrate motif;Casein kinase II substrate motif;ERK1,2 kinase substrate motif;GSK-3, ERK1, ERK2, CDK5 substrate motif;PKA kinase substrate motif;PKC kinase substrate motif;Pyruvate dehydrogenase kinase substrate motif;WW domain binding motif
A8MXR0	163	A8MXR0;Q9Y608	163;323	A8MXR0;C9JSU1;Q9Y608	163;91;323	Leucine-rich repeat flightless-interacting protein 2	LRRFIP2;LRRFIP2;LRRFIP2	S										1	4.18e-05	101.57	0.452588	101.57	0	765.333	1.1814	SSRNSASATTPLSGNSSRRGSGDTSSLIDPD	_NSASATTPLSGNS(ph)SR_	CK1_group;PKC_group	CSNK1A1;PRKCA;PRKCB;PRKCZ	0.4723	0.20825	1.8694					PKA kinase substrate motif;PKC kinase substrate motif
A8MXR0	164	A8MXR0;Q9Y608	164;324	A8MXR0;C9JSU1;Q9Y608	164;92;324	Leucine-rich repeat flightless-interacting protein 2	LRRFIP2;LRRFIP2;LRRFIP2	S										1	4.18e-05	101.57	0.452588	101.57	0	765.333	1.1814	SRNSASATTPLSGNSSRRGSGDTSSLIDPDT	_NSASATTPLSGNS(ph)SR_	PKC_group	PRKCA;PRKCB;PRKCZ	0.3461	0.1935	1.7739					G protein-coupled receptor kinase 1 substrate motif;GSK3 kinase substrate motif;MAPKAPK2 kinase substrate motif;MDC1 BRCT domain binding motif;PKA kinase substrate motif;PKC kinase substrate motif;Plk1 PBD domain binding motif
A8MXR0	168	A8MXR0	168	A8MXR0;C9JSU1	168;96		LRRFIP2;LRRFIP2	S			0.117961	0.106348	0.0521377	0.117961				1	1.11e-16	159.36	0.999397	140.59	33.2518	1093.5	0.57247	ASATTPLSGNSSRRGSGDTSSLIDPDTSLSE	_RGS(ph)GDTSSLIDPDTSLSELR_	CaMKII_group;PAK_group;PKA_group	CAMK2A;PAK1;PRKACA	0.1879	0.1731	1.3617					14-3-3 domain binding motif;Calmodulin-dependent protein kinase II substrate motif;Casein kinase I substrate motif;Casein kinase II substrate motif;G protein-coupled receptor kinase 1 substrate motif;GSK3 kinase substrate motif;MAPKAPK2 kinase substrate motif;PAK2 kinase substrate motif;PKA kinase substrate motif;PKC epsilon kinase substrate motif;PKC kinase substrate motif
A8MY32	4	A8MY32	4	A8MY32	4		POM121C	S	+		0.711583	0.790855	0.659103	0.659103				1	0.000365402	107.06	0.9994	107.06	32.2142	572.748	-0.97691	____________MVCSPVTVRIAPPDRRFSR	_M(ox)VCS(ph)PVTVR_										Casein kinase I substrate motif;Casein kinase II substrate motif;ERK1,2 kinase substrate motif;GSK-3, ERK1, ERK2, CDK5 substrate motif;WW domain binding motif
B0I1T2	1010	B0I1T2	1010	B0I1T2	1010	Unconventional myosin-Ig;Minor histocompatibility antigen HA-2	MYO1G	S			-0.148753			-0.148753				1	0.00953761	60.628	0.865171	60.628	8.07325	622.297	2.7432	PRPEQPEPDFRCARGSFTLLWPSR_______	_GS(ph)FTLLWPSR_	PAK_group;PKA_group;PKC_group	PAK1;PRKACA;PRKCA;PRKCB	0.17775	0.2115	1.34015					Casein kinase II substrate motif;PKA kinase substrate motif;PKC kinase substrate motif
B0I1T2	695	B0I1T2	695	B0I1T2	695	Unconventional myosin-Ig;Minor histocompatibility antigen HA-2	MYO1G	S			0.0097772	0.113834	-0.0371919	0.00977712				1	0.00717467	86.898	1	69.275	69.2755	484.758	-0.8757	LQGDVAFGHSKLFIRSPRTLVTLEQSRARLI	_LFIRS(ph)PR_										Casein kinase I substrate motif;Casein kinase II substrate motif;ERK1,2 kinase substrate motif;Growth associated histone HI kinase substrate motif;GSK-3, ERK1, ERK2, CDK5 substrate motif;PKA kinase substrate motif;PKC kinase substrate motif;WW domain binding motif
B0I1T2	992	B0I1T2	992	B0I1T2	992	Unconventional myosin-Ig;Minor histocompatibility antigen HA-2	MYO1G	S				0.24306		0.24306				1	0.000653936	67.995	1	67.995	67.9947	663.654	1.2027	SDCIPLSHRGVRRLISVEPRPEQPEPDFRCA	_LIS(ph)VEPRPEQPEPDFR_	CaMKII_group;PAK_group	CAMK2A;PAK1	0.12995	0.16765	1.5086					14-3-3 domain binding motif;Calmodulin-dependent protein kinase II alpha substrate motif;Calmodulin-dependent protein kinase II substrate motif;Calmodulin-dependent protein kinase IV substrate motif;Casein kinase II substrate motif;Chk1 kinase substrate motif;Doublecortin kinase-1 kinase substrate motif;Phosphorylase kinase substrate motif;PKA kinase substrate motif;PKC kinase substrate motif;ZIP…
B0QY95	55	B0QY95	55	B0QY95;Q9NQG6;Q7L890	55;55;55	Mitochondrial dynamic protein MID51	SMCR7L;SMCR7L;DKFZp434E0130	S		+	-1.50099	-0.928924	-1.04201	-1.50099				1	4.26e-11	145.43	1	142.45	79.2657	580.741	1.456	GIATLAVKRMYDRAISAPTSPTRLSHSGKRS	_AIS(ph)APTS(ph)PTR_										14-3-3 domain binding motif;Calmodulin-dependent protein kinase II substrate motif;Calmodulin-dependent protein kinase IV substrate motif;Casein kinase I substrate motif;Casein kinase II substrate motif;G protein-coupled receptor kinase 1 substrate motif;GSK3 kinase substrate motif;PKA kinase substrate motif;PKC kinase substrate motif
B0QY95	59	B0QY95	59	B0QY95;Q9NQG6;Q7L890	59;59;59	Mitochondrial dynamic protein MID51	SMCR7L;SMCR7L;DKFZp434E0130	S	+		0.610417	0.586693	0.602837	0.602837				1	4.26e-11	145.43	0.967643	142.12	15.773	540.758	0.094556	LAVKRMYDRAISAPTSPTRLSHSGKRSWEEP	_AISAPTS(ph)PTR_	MAPK3_MAPK1_MAPK7_NLK_group	MAPK3	0.2286	0.0529	1.6371					Casein kinase II substrate motif;Cdc2 kinase substrate motif;CDK kinase substrate motif;CDK1,2,4,6 kinase substrate motif;ERK1,2 kinase substrate motif;Growth associated histone HI kinase substrate motif;GSK-3, ERK1, ERK2, CDK5 substrate motif;MAPKAPK2 kinase substrate motif;WW domain binding motif
B0QY95	94	B0QY95	94	B0QY95;Q9NQG6	94;94	Mitochondrial dynamic protein MID51	SMCR7L;SMCR7L	S			-0.106871		-0.269947	-0.106871				1	0.000271345	58.861	0.988007	58.861	19.1795	1038.82	-0.9159	SPRLLNRDMKTGLSRSLQTLPTDSSTFDTDT	_S(ph)LQTLPTDSSTFDTDTFCPPRPKPVAR_	PKC_group	PRKCB	0.1146	0.0548	1.0655					Casein kinase I substrate motif;Casein kinase II substrate motif
B0QY95	58	B0QY95	58	B0QY95;Q9NQG6;Q7L890	58;58;58	Mitochondrial dynamic protein MID51	SMCR7L;SMCR7L;DKFZp434E0130	T				-0.775243		-0.775244				1	0.000390957	95.651	0.576715	86.467	1.99876	580.741	-1.6979	TLAVKRMYDRAISAPTSPTRLSHSGKRSWEE	_AIS(ph)APT(ph)SPTR_	CK1_group	CSNK1A1	0.114	0.0464	1.2918					Casein kinase I substrate motif;DNA dependent Protein kinase substrate motif
B0QYN7	71	B0QYN7	71	B0QYN7;P63279;H3BQQ9;H3BPC4	71;71;71;67	SUMO-conjugating enzyme UBC9	UBE2I;UBE2I;UBE2I;UBE2I	S			-0.432649			-0.432649	0.0976108	0.1121		0.122251	1.4e-22	171.26	0.97957	171.26	16.8077	802.857	0.40198	GLFKLRMLFKDDYPSSPPKCKFEPPLFHPNV	_MLFKDDYPSS(ph)PPK_	CDK2_CDK3_CDK1_CDK5_group;IKKalpha_IKKbeta_group;MAPK3_MAPK1_MAPK7_NLK_group	CDK1;CDK2;CHUK;MAPK1;MAPK3;NLK	0.2835	0.4157	2.01545					Cdc2 kinase substrate motif;CDK kinase substrate motif;CDK1,2,4,6 kinase substrate motif;ERK1,2 kinase substrate motif;Growth associated histone HI kinase substrate motif;GSK-3, ERK1, ERK2, CDK5 substrate motif;MDC1 BRCT domain binding motif;Plk1 PBD domain binding motif;WW domain binding motif
B1AHC4	11	B1AHC4	11	B1AHC4;B1AHC3;P85299;E9PH80;F8WEZ7	11;11;11;11;11	Proline-rich protein 5	ARHGAP8;ARHGAP8;PRR5;PRR5;PRR5	S			-0.283738	0.111966	-0.0635448	-0.0459377				1	0.00012161	94.532	0.966443	82.651	14.6068	674.796	0.49571	_____MRTLRRLKFMSSPSLSDLGKREPAAA	_FMS(ph)SPSLSDLGK_	MAP2K_group;PAK_group	MAP2K2;PAK1	0.09155	0.49785	1.33795					AMP-activated protein kinase substrate motif;Casein kinase I substrate motif;Casein kinase II substrate motif;HMGCoA Reductase kinase substrate motif;PKA kinase substrate motif;PKC kinase substrate motif
B1AHH2	47	B1AHH2	47	B1AHH2;P17861	47;47	X-box-binding protein 1	XBP1;XBP1	S					-0.816952	-0.816952				1	0.0018612	66.152	0.999955	66.152	43.506	724.83	0.30285	AGQALPLMVPAQRGASPEAASGGLPQARKRQ	_GAS(ph)PEAASGGLPQAR_	EIF2AK2;JNK_group;PKB_group	AKT1;EIF2AK2;MAPK8	0.0234	0.778	2.4785					14-3-3 domain binding motif;Calmodulin-dependent protein kinase II substrate motif;Casein kinase II substrate motif;ERK1,2 kinase substrate motif;G protein-coupled receptor kinase 1 substrate motif;GSK-3, ERK1, ERK2, CDK5 substrate motif;PKA kinase substrate motif;PKC kinase substrate motif;WW domain binding motif
B1AJR3	5	B1AJR3	5	B1AJR3	5		LL22NC03-75H12.2-001	S			0.0363276	0.126973		0.0817486				1	0.000161874	92.38	1	92.38	92.3804	805.365	1.8251	___________MFPASPWAQPAQAKWSSPGP	_MFPAS(ph)PWAQPAQAK_										ERK1,2 kinase substrate motif;GSK-3, ERK1, ERK2, CDK5 substrate motif;WW domain binding motif
B1AKC7	141	B1AKC7	141	B1AKC7	141		RASAL2	S				0.482435	0.375179	0.428786				1	0.00206341	79.466	1	46.88	46.8795	617.303	-1.9638	YPPEGATKLEVPAERSPRRRSISGTSTSEKP	_LEVPAERS(ph)PR_	PKC_group	PRKCA;PRKCB	0.2281	0.1989	1.74225	CMGC/CDK	CDK4;CDK5;CDK6;CDK7;CHED;CRK7;PCTAIRE1;PCTAIRE2;PFTAIRE1;PFTAIRE2	2.47	2.22;2.22;2.22;2.22;2.22;2.22;2.22;2.22;2.22;2.22	Cdc2 kinase substrate motif;CDK kinase substrate motif;CDK1,2,4,6 kinase substrate motif;ERK1,2 kinase substrate motif;Growth associated histone HI kinase substrate motif;GSK-3, ERK1, ERK2, CDK5 substrate motif;PKA kinase substrate motif;PKC kinase substrate motif;WW domain binding motif
B1AKJ5	86	B1AKJ5	86	B1AKJ5;O43847	86;86	Nardilysin	NRD1;NRD1	S			0.308594	-0.0664727	0.12499	0.12499				1	3.98e-104	172.58	1	159.75	159.754	714.294	0.49139	DLGENSRVARLGADESEEEGRRGSLSNAGDP	_LGADES(ph)EEEGRR_										b-Adrenergic Receptor kinase substrate motif;BARD1 BRCT domain binding motif;Casein kinase II substrate motif;G protein-coupled receptor kinase 1 substrate motif
B1AKJ5	94	B1AKJ5	94	B1AKJ5;O43847	94;94	Nardilysin	NRD1;NRD1	S			-1.76783	-1.87414	-0.00215121	-0.00215122				1	2.33e-41	159.89	0.985867	159.89	19.3426	899.078	0.83137	ARLGADESEEEGRRGSLSNAGDPEIVKSPSD	_LGADESEEEGRRGS(ph)LSNAGDPEIVK_	CaMKII_group;CK1_group;PAK_group;PKA_group;PKC_group	CAMK2A;CSNK1A1;PAK1;PRKACA;PRKCB	0.122	0.163	1.3186					14-3-3 domain binding motif;Aurora-A kinase substrate motif;Calmodulin-dependent protein kinase II substrate motif;Casein kinase II substrate motif;G protein-coupled receptor kinase 1 substrate motif;PAK2 kinase substrate motif;Phosphorylase kinase substrate motif;PKA kinase substrate motif;PKC epsilon kinase substrate motif;PKC kinase substrate motif
B1AKZ3	137	B1AKZ3	137	B1AKZ3;Q15121;B1AKZ5	137;116;94	Astrocytic phosphoprotein PEA-15	PEA15;PEA15;PEA15	S			-0.247936	0.451963	-0.285319	-0.209578				1	1.72e-46	222.96	1	96.848	75.314	970.99	0.30765	RIPSAKKYKDIIRQPSEEEIIKLAPPPKKA_	_YKDIIRQPS(ph)EEEIIK_	CaMKII_group;PKB_group;RSK_group	AKT1;CAMK2A;CAMK2G;RPS6KA3	0.11885	0.896	3.5607	AGC/RSK;CAMK;CAMK/CAMK2;Other/CK2	CaMK2b;CaMK2d;CaMK2g;CK2a1;CK2a2;MSK1;MSK2;p70S6K;p70S6Kb;PIM1;PIM2;RSK1;RSK2;RSK4	2.17	1.63;1.63;1.72;1.72;1.72;1.72;1.72;1.72;1.72;2.61;2.61;2.61;5.14;5.14	14-3-3 domain binding motif;AMP-activated protein kinase substrate motif;BARD1 BRCT domain binding motif;Calmodulin-dependent protein kinase I substrate motif;Calmodulin-dependent protein kinase II substrate motif;Calmodulin-dependent protein kinase IV substrate motif;Casein kinase II substrate motif;Chk1 kinase substrate motif;DNA dependent Protein kinase substrate motif;G protein-coupled recept…
B1AP22	58	B1AP22	58	B1AP22;P49810;C9J5P7;E5RJ26;E5RHT1	58;25;25;25;25	Presenilin-2;Presenilin-2 NTF subunit;Presenilin-2 CTF subunit	PSEN2;PSEN2;PSEN2;PSEN2;PSEN2	S			-0.221438	0.211635	-0.287043	-0.208811				1	4.31e-21	119.45	0.965375	119.45	14.4918	686.794	0.6546	EEEVCDERTSLMSAESPTPRSCQEGRQGPED	_TSLM(ox)SAES(ph)PTPR_	CDK2_CDK3_CDK1_CDK5_group;CK1_group;HIPK1_HIPK2_group;MAPK3_MAPK1_MAPK7_NLK_group;NEK1_NEK5_NEK3_NEK4_NEK11_NEK2_group	CDK1;CDK2;CDK5;CSNK1A1;CSNK1D;HIPK2;MAPK3;NEK2	0.13375	0.5017	3.7425	CMGC;CMGC/CDK	CCRK;CDK4;CDK5;CDK6;CDK7;CDK9;CDKL1;CDKL2;CDKL3;CDKL4;CDKL5;CHED;CLK1;CLK2;CLK3;CLK4;CRK7;ICK;MAK;MOK;MSSK1;PCTAIRE1;PCTAIRE2;PCTAIRE3;PFTAIRE1;PFTAIRE2;SRPK1;SRPK2	3.54	2.59;2.59;2.59;2.59;2.59;2.59;2.59;2.59;2.59;2.59;2.59;2.59;2.59;2.59;2.59;2.22;2.22;2.22;2.22;2.22;2.22;2.22;2.22;2.22;2.22;2.22;2.22;2.22	b-Adrenergic Receptor kinase substrate motif;Casein kinase II substrate motif;ERK1,2 kinase substrate motif;GSK-3, ERK1, ERK2, CDK5 substrate motif;WW domain binding motif
B2RTY4	1829	B2RTY4	1829	B2RTY4;H3BRD5;H3BV44	1829;1829;679	Unconventional myosin-IXa	MYO9A;MYO9A;MYO9A	S			0.0264459	-0.235025	-0.135158	-0.0560862				1	0.000100818	76.588	1	76.588	76.588	706.827	0.65488	LPGSCRKEFKENKEPSPKAKRKRSVKISNVA	_EFKENKEPS(ph)PK_	PKC_group	PRKCB	0.125	0.1768	1.1658					DNA dependent Protein kinase substrate motif;ERK1,2 kinase substrate motif;Growth associated histone HI kinase substrate motif;GSK-3, ERK1, ERK2, CDK5 substrate motif;PKA kinase substrate motif;PKC kinase substrate motif;WW domain binding motif
B2RTY4	1299	B2RTY4	1299	B2RTY4;H3BRD5;H3BV44;H3BMM1	1299;1299;78;919	Unconventional myosin-IXa	MYO9A;MYO9A;MYO9A;MYO9A	S			-0.0434972	0.180148		0.0683269				1	2.87e-07	119.96	0.982362	119.96	17.4582	677.312	-0.53355	IFSLELLKVRSLGGISPSEDRRWSTELVPEG	_SLGGIS(ph)PSEDRR_	MAPK3_MAPK1_MAPK7_NLK_group	MAPK3	0.1443	0.2078	1.0532					Casein kinase II substrate motif;ERK1,2 kinase substrate motif;GSK-3, ERK1, ERK2, CDK5 substrate motif;WW domain binding motif
B3KQV7	333	B3KQV7	333	B3KQV7;Q99808	333;254	Equilibrative nucleoside transporter 1	SLC29A1;SLC29A1	S			0.134878	0.160662	0.142871	0.142871				1	1.5e-42	202.85	1	124.07	124.068	446.222	0.22281	KLEGPGEQETKLDLISKGEEPRAGKEESGVS	_LDLIS(ph)KGEEPR_	CaMKII_group	CAMK2A	0.0848	0.1346	1.0707					Casein kinase I substrate motif;Casein kinase II substrate motif
B3KS98	197	B3KS98;E5RJT0	197;151	B3KS98;O15372;E5RGU4;E5RJT0	197;183;199;151	Eukaryotic translation initiation factor 3 subunit H	EIF3S3;EIF3H;EIF3H;EIF3H	S			-0.0659591	-0.0823926	-0.0687406	-0.0799964				1	1.81e-08	156.58	1	121.76	121.76	457.89	0.49036	RLTPKLMEVCKEKDFSPEALKKANITFEYMF	_EKDFS(ph)PEALKK_	CDK2_CDK3_CDK1_CDK5_group;CK2_group	CDK1;CSNK2A2	0.0851	0.6941	1.97935					Casein kinase II substrate motif;ERK1,2 kinase substrate motif;GSK-3, ERK1, ERK2, CDK5 substrate motif;PKA kinase substrate motif;PKC kinase substrate motif;WW domain binding motif
B3KSH1	273	B3KSH1	273	B3KSH1;O00303;B4DEW9	273;258;109	Eukaryotic translation initiation factor 3 subunit F	EIF3F;EIF3F	S			-0.0806828	-0.148225	-0.067455	-0.0870743		-0.0772236		0.753616	3.23e-56	214.91	1	142.56	79.2561	481.184	-0.17393	DTERIGVDLIMKTCFSPNRVIGLSSDLQQVG	_TCFS(ph)PNR_	CDK2_CDK3_CDK1_CDK5_group;CK2_group	CDK1;CSNK2A2	0.1298	0.7225	4.62245					AMP-activated protein kinase substrate motif;Cdc2 kinase substrate motif;CDK kinase substrate motif;CDK1,2,4,6 kinase substrate motif;ERK1,2 kinase substrate motif;GSK-3, ERK1, ERK2, CDK5 substrate motif;PKA kinase substrate motif;WW domain binding motif
B3KSH1	270	B3KSH1	270	B3KSH1;O00303;B4DEW9	270;255;106	Eukaryotic translation initiation factor 3 subunit F	EIF3F;EIF3F	T			0.290542	0.115965	-0.124409	0.115965		-0.0772236		0.753616	2.91e-09	124.82	0.537566	108.75	0.653863	867.414	1.2059	AYYDTERIGVDLIMKTCFSPNRVIGLSSDLQ	_T(ph)CFSPNRVIGLSSDLQQVGGASAR_	CK2_group	CSNK2A2	0.022	0.927	2.8027					Casein kinase I substrate motif;Casein kinase II substrate motif;G protein-coupled receptor kinase 1 substrate motif
B3KSY9	505	B3KSY9	505	B3KSY9;O75925	505;503	E3 SUMO-protein ligase PIAS1	PIAS1;PIAS1	S			0.381505	0.318346	0.423417	0.366588				1	4.41e-23	173.37	0.996587	149.09	24.6537	771.887	-0.10354	SPLNNKGILSLPHQASPVSRTPSLPAVDTSY	_GILSLPHQ(de)AS(ph)PVSR_	CDK2_CDK3_CDK1_CDK5_group;IKKalpha_IKKbeta_group;MAPK3_MAPK1_MAPK7_NLK_group	CDK1;CDK2;CDK5;CHUK;MAPK3;MAPK7	0.2029	0.41375	1.46795	Atypical/PIKK/FRAP;CMGC/DYRK	DYRK1A;DYRK1B;DYRK3;FRAP;HIPK1;HIPK2;HIPK3;HIPK4	3.5	2.09;2.09;2.09;2.09;2.09;2.09;2.09;4.72	Casein kinase I substrate motif;Casein kinase II substrate motif;ERK1,2 kinase substrate motif;GSK-3, ERK1, ERK2, CDK5 substrate motif;WW domain binding motif
B3KSY9	490	B3KSY9	490	B3KSY9;O75925	490;488	E3 SUMO-protein ligase PIAS1	PIAS1;PIAS1	S			0.634036	0.389347	0.697418	0.634036				1	4.97e-08	122.96	0.9934	112.34	21.7771	798.36	-0.46829	EEPSAKRTCPSLSPTSPLNNKGILSLPHQAS	_TCPSLSPTS(ph)PLNNK_	CDK2_CDK3_CDK1_CDK5_group;IKKalpha_IKKbeta_group;MAPK3_MAPK1_MAPK7_NLK_group	CDK1;CDK2;CHUK;MAPK3;MAPK7	0.1324	0.4174	1.4266	CMGC/MAPK	Erk1;Erk2;Erk3;Erk5;JNK1;JNK2;JNK3;p38a;p38b;p38d;p38g	2.17	2.11;2.11;2.11;2.11;2.11;2.11;2.11;2.11;2.11;2.11;2.11	ERK1,2 kinase substrate motif;GSK-3, ERK1, ERK2, CDK5 substrate motif;WW domain binding motif
B3KTC7	622	B3KTC7	622	B3KTC7;P49959;F8W7U8	622;619;618	Double-strand break repair protein MRE11A	MRE11A;MRE11A;MRE11A	S			0.63988			0.63988				1	0.00960679	56.225	1	56.225	56.2251	559.751	-0.37833	RSRNSKTAVSASRNMSIIDAFKSTRQQPSRN	_NMS(ph)IIDAFK_	CaMKII_group;DNAPK;NEK1_NEK5_NEK3_NEK4_NEK11_NEK2_group;PAK_group;PKB_group	AKT1;CAMK2A;HYRC;NEK1;PAK1	0.1152	0.563	1.5848					14-3-3 domain binding motif;Calmodulin-dependent protein kinase II substrate motif;Casein kinase II substrate motif;G protein-coupled receptor kinase 1 substrate motif;MAPKAPK2 kinase substrate motif;Phosphorylase kinase substrate motif;PKA kinase substrate motif;PKC kinase substrate motif;Pyruvate dehydrogenase kinase substrate motif
B3KTC7	652	B3KTC7	652	B3KTC7;P49959;F8W7U8	652;649;648	Double-strand break repair protein MRE11A	MRE11A;MRE11A;MRE11A	S			0.0312541			0.031254				1	1.43e-13	144.7	0.999995	144.7	53.7234	1363.09	1.4563	NVTTKNYSEVIEVDESDVEEDIFPTTSKTDQ	_NYSEVIEVDES(ph)DVEEDIFPTTSK_	CK2_group;DNAPK;NEK1_NEK5_NEK3_NEK4_NEK11_NEK2_group	CSNK2A1;HYRC;NEK1	0.0306	0.563	2.9811					b-Adrenergic Receptor kinase substrate motif;Casein kinase II substrate motif
B3KYA7	344	B3KYA7	344	B3KYA7;Q13188;E5RFQ9	344;316;205	Serine/threonine-protein kinase 3;Serine/threonine-protein kinase 3 36kDa subunit;Serine/threonine-protein kinase 3 20kDa subunit	STK3;STK3;STK3	S			-0.00966955	0.0196308	0.0405417	0.0258793				1	3.63e-06	110.31	0.999995	110.31	53.8913	868.334	-0.47618	RHEEQQRELEEEEENSDEDELDSHTMVKTSV	_ELEEEEENS(ph)DEDELDSHTM(ox)VK_	CK1_group	CSNK1A1	0.1385	0.1674	1.3564					Casein kinase I substrate motif;Casein kinase II substrate motif;Pyruvate dehydrogenase kinase substrate motif
B3KYA7	364	B3KYA7	364	B3KYA7;Q13188;E5RFQ9	364;336;225	Serine/threonine-protein kinase 3;Serine/threonine-protein kinase 3 36kDa subunit;Serine/threonine-protein kinase 3 20kDa subunit	STK3;STK3;STK3	T			-0.252776	-0.474994	0.0801119	-0.252776				1	2e-07	145.6	0.998843	145.6	29.3635	581.744	-0.10714	LDSHTMVKTSVESVGTMRATSTMSEGAQTMI	_TSVESVGT(ph)M(ox)R_	CK1_group;MST_group;PKC_group;YSK_group	CSNK1A1;KRS1;PRKCA;PRKCB;PRKCZ;STK24;STK25;STK3;STK4	0.255	0.4769	1.7655					G protein-coupled receptor kinase 1 substrate motif;PKA kinase substrate motif;PKC kinase substrate motif
B4DDH6	63	B4DDH6	63	B4DDH6;Q9NWW5;H3BUT1;H3BUV4;H3BNF1	63;31;31;31;31	Ceroid-lipofuscinosis neuronal protein 6	CLN6;CLN6;CLN6;CLN6;CLN6	S				0.702214		0.702214				1	0.000729829	69.602	0.999713	69.602	35.4231	590.243	0.56455	ETSLRKLKFKGKKHGSVSADEAARTAPFHLD	_HGS(ph)VSADEAAR_	PAK_group;PKC_group	PAK1;PRKCB	0.15455	0.1876	1.2855					Casein kinase II substrate motif;Phosphorylase kinase substrate motif;PKA kinase substrate motif;PKC kinase substrate motif
B4DGP8	618	B4DGP8	618	B4DGP8;P27824;B4E2T8	618;583;475	Calnexin	CANX;CANX	S			-0.016512	-0.0430215	-0.0237977	-0.0259994	0.103665	0.00963388		0.865536	0	300.56	1	67.251	67.2511	890.405	0.14389	EDRKPKAEEDEILNRSPRNRKPRRE______	_AEEDEILNRS(ph)PRN(de)R_	CDK2_CDK3_CDK1_CDK5_group;PKC_group;PKGcGK_group	CDK1;CDK2;PRKCA;PRKCB;PRKCE;PRKCZ;PRKG2	0.2395	0.391	1.3584	Atypical/PIKK/FRAP	FRAP	5.87	4.72	ERK1,2 kinase substrate motif;Growth associated histone HI kinase substrate motif;GSK-3, ERK1, ERK2, CDK5 substrate motif;PKA kinase substrate motif;PKC kinase substrate motif;WW domain binding motif
B4DGP8	589	B4DGP8	589	B4DGP8;P27824;B4E2T8	589;554;446	Calnexin	CANX;CANX	S			-0.177702	0.422448	-0.101614	0.422448		0.00963388		0.865536	2.25e-16	155.05	1	155.05	120.163	789.307	0.31952	DEEEEGEEKLEEKQKSDAEEDGGTVSQEEED	_S(ph)DAEEDGGTVS(ph)QEEEDRKPK_	CK2_group;PKGcGK_group	CSNK2A1;PRKG2	0.23605	0.39815	2.02655	CK1;Other/CK2	CK1a2;CK1d;CK1e;CK1g1;CK1g2;CK1g3;CK2a1;CK2a2;TTBK1;TTBK2;VRK1;VRK2;VRK3	2.55	2.15;2.15;2.15;2.15;2.15;2.15;2.15;2.15;2.15;2.15;2.15;5.14;5.14	Casein kinase II substrate motif;PKA kinase substrate motif;PKC kinase substrate motif
B4DGP8	599	B4DGP8	599	B4DGP8;P27824;B4E2T8	599;564;456	Calnexin	CANX;CANX	S			0.0621218	0.0380147	0.142087	0.0473988		0.00963388		0.865536	1.65e-82	257.96	0.999994	257.96	52.5217	762.652	-0.63276	EEKQKSDAEEDGGTVSQEEEDRKPKAEEDEI	_SDAEEDGGTVS(ph)QEEEDRKPK_	ATM_ATR_group;CK1_group;CK2_group;PKGcGK_group	ATM;CSNK1A1;CSNK2A1;PRKG2	0.2687	0.36205	1.73615	CK1;Other/CK2	CK1a2;CK1d;CK1e;CK1g1;CK1g2;CK1g3;CK2a1;CK2a2;TTBK1;TTBK2;VRK1;VRK2;VRK3	2.71	2.15;2.15;2.15;2.15;2.15;2.15;2.15;2.15;2.15;2.15;2.15;5.14;5.14;2.15;2.15;2.15;2.15;2.15;2.15;2.15;2.15;2.15;2.15;2.15;5.14;5.14	ATM kinase substrate motif;Casein kinase II substrate motif;DNA dependent Protein kinase substrate motif
B4DH25	115	B4DH25	115	B4DH25;Q92564;B4DH26;D6RDV8;D6RAL8;D6RB33	115;71;11;115;115;71	DCN1-like protein 4	DCUN1D4;DCUN1D4;DCUN1D4;DCUN1D4;DCUN1D4;DCUN1D4	S		+	-0.587576	-0.508814	-0.484267	-0.508814				1	4.73e-11	123.76	0.999999	123.76	62.5909	598.769	0.47811	CFNKVMPPRKKRRPASGDDLSAKKSRHDSMY	_RPAS(ph)GDDLSAK_	CaMKII_group;PAK_group	CAMK2A;PAK1	0.17195	0.11455	1.61795					14-3-3 domain binding motif;Calmodulin-dependent protein kinase II substrate motif;Casein kinase II substrate motif;MAPKAPK1 kinase substrate motif;PKA kinase substrate motif;PKC kinase substrate motif;Pyruvate dehydrogenase kinase substrate motif;ZIP kinase substrate motif
B4DKT0	463	B4DKT0	463	B4DKT0;Q9H8Y8	463;451	Golgi reassembly-stacking protein 2	GORASP2;GORASP2	S			-0.126927	-0.0366147	-0.00553615	-0.0366147				1	2.28e-56	218.94	0.999999	218.94	58.8329	1197.54	0.13841	SEKPVSAAVDANASESP______________	_VGDSTPVSEKPVSAAVDANASES(ph)P_	MAPK3_MAPK1_MAPK7_NLK_group	MAPK1	0.0481	0.94	2.6568					b-Adrenergic Receptor kinase substrate motif;ERK1,2 kinase substrate motif;GSK-3, ERK1, ERK2, CDK5 substrate motif;WW domain binding motif
B4DKT0	427	B4DKT0	427	B4DKT0;Q9H8Y8	427;415	Golgi reassembly-stacking protein 2	GORASP2;GORASP2	T			-0.0557263	-0.0700879	-0.307591	-0.0629118				1	1.87e-06	91.128	0.888521	78.413	9.01519	862.411	0.61164	TTAKADAASSLTVDVTPPTAKAPTTVEDRVG	_ADAASSLTVDVT(ph)PPTAK_	CDK2_CDK3_CDK1_CDK5_group;MAPK3_MAPK1_MAPK7_NLK_group	CDK1;MAPK1;MAPK3	0.2358	0.489	4.1027					Casein kinase I substrate motif;G protein-coupled receptor kinase 1 substrate motif;GSK-3, ERK1, ERK2, CDK5 substrate motif;WW domain binding motif
B4DKT0	430	B4DKT0	430	B4DKT0;Q9H8Y8	430;418	Golgi reassembly-stacking protein 2	GORASP2;GORASP2	T					-0.527887	-0.527887				1	0.000591068	91.128	0.499966	91.128	0	862.411	-0.33174	KADAASSLTVDVTPPTAKAPTTVEDRVGDST	_ADAASSLTVDVT(ph)PPTAK_	MAP2K_group;MAPK3_MAPK1_MAPK7_NLK_group;PKC_group	MAP2K1;MAPK1;PRKCB	0.0529	0.619	2.0142					DNA dependent Protein kinase substrate motif;G protein-coupled receptor kinase 1 substrate motif;PKA kinase substrate motif;PKC kinase substrate motif
B4DKT0	234	B4DKT0	234	B4DKT0;Q9H8Y8	234;222	Golgi reassembly-stacking protein 2	GORASP2;GORASP2	T			0.19497	-0.10067		0.108625				1	0.00145129	80.236	0.969702	80.236	15.0523	852.444	-0.39599	FEEGKKISLPGQMAGTPITPLKDGFTEVQLS	_ISLPGQMAGT(ph)PITPLK_	CDK2_CDK3_CDK1_CDK5_group;CK1_group;MAP2K_group;MAPK3_MAPK1_MAPK7_NLK_group	CDK1;CSNK1A1;MAP2K1;MAPK1;MAPK3	0.1915	0.489	2.5582					Casein kinase I substrate motif;G protein-coupled receptor kinase 1 substrate motif;GSK-3, ERK1, ERK2, CDK5 substrate motif;WW domain binding motif
B4DQM4	326	B4DQM4	326	B4DQM4;Q9HCN4	326;312	GPN-loop GTPase 1	GPN1	S				0.447844		0.447844				1	0.0116627	49.592	0.781614	49.592	5.53857	921.972	0.4959	KDMGSVALDAGTAKDSLSPVLHPSDLILTRG	_DS(ph)LSPVLHPSDLILTR_										b-Adrenergic Receptor kinase substrate motif;Casein kinase II substrate motif;PKA kinase substrate motif;PKC kinase substrate motif
B4DQM4	328	B4DQM4	328	B4DQM4;Q9HCN4	328;314	GPN-loop GTPase 1	GPN1	S			0.264717	0.151339		0.204892				1	7.27e-05	101.49	0.995403	100.92	23.3569	614.984	0.46901	MGSVALDAGTAKDSLSPVLHPSDLILTRGTL	_DSLS(ph)PVLHPSDLILTR_	MAPK3_MAPK1_MAPK7_NLK_group	MAPK1;MAPK3	0.2327	0.1862	1.3485					Casein kinase I substrate motif;ERK1,2 kinase substrate motif;GSK-3, ERK1, ERK2, CDK5 substrate motif;PKA kinase substrate motif;WW domain binding motif
B4DQM4	352	B4DQM4	352	B4DQM4;Q9HCN4	352;338	GPN-loop GTPase 1	GPN1	S			0.0943712	0.0669503	0.0170667	0.0597706				1	1.57e-154	311.65	0.998939	311.65	29.7373	1178.93	-0.56743	ILTRGTLDEEDEEADSDTDDIDHRVTEESHE	_GTLDEEDEEADS(ph)DTDDIDHR_	CK1_group	CSNK1A1	0.1383	0.1675	1.3564					b-Adrenergic Receptor kinase substrate motif;Casein kinase I substrate motif;Casein kinase II substrate motif;Pyruvate dehydrogenase kinase substrate motif
B4DR61	414	B4DR61	414	B4DR61;P61619	414;408	Protein transport protein Sec61 subunit alpha isoform 1	SEC61A1;SEC61A1	S			0.10916	0.342555	0.82725	0.225892	0.301822	0.301822		0.113156	0.000579288	91.123	0.817698	91.123	6.518	648.276	-0.29364	QLKEQQMVMRGHRETSMVHELNRYIPTAAAF	_ETS(ph)MVHELNR_	CaMKII_group	CAMK2A	0.154	0.1433	1.9017					14-3-3 domain binding motif;Calmodulin-dependent protein kinase II substrate motif;PKA kinase substrate motif;PKC epsilon kinase substrate motif;PKC kinase substrate motif
B4DR80	4	B4DR80	4	B4DR80	4		STK24	S			-0.082026	0.0890913	-0.0935865	-0.0580674				1	1.65e-42	196.83	1	196.83	70.539	893.421	-0.73182	____________MAHSPVQSGLPGMQNLKAD	_(ac)AHS(ph)PVQSGLPGMQNLK_										Casein kinase I substrate motif;ERK1,2 kinase substrate motif;G protein-coupled receptor kinase 1 substrate motif;GSK3 kinase substrate motif;GSK-3, ERK1, ERK2, CDK5 substrate motif;WW domain binding motif
B4DRN7	864	B4DRN7	864	B4DRN7;F5H2A1	864;866		KIAA0528;KIAA0528	S			0.204266			0.204266				1	0.0018134	70.281	0.877393	70.281	8.54879	699.782	-0.23039	SASSNSGIPAAQRATSVDYSSFADRCSSWIE	_ATS(ph)VDYSSFADR_	CaMKII_group;PAK_group	CAMK2A;PAK1	0.17035	0.11725	1.6025					14-3-3 domain binding motif;Calmodulin-dependent protein kinase II substrate motif;Casein kinase II substrate motif;G protein-coupled receptor kinase 1 substrate motif;GSK3 kinase substrate motif;Phosphorylase kinase substrate motif;PKA kinase substrate motif;PKC kinase substrate motif
B4DST0	402	B4DST0	402	B4DST0;O43463	402;391	Histone-lysine N-methyltransferase SUV39H1	SUV39H1;SUV39H1	S			0.163499	0.270708	-0.0118352	0.12075				1	1.8e-23	168.64	1	90.968	78.5	785.852	-1.2273	STRMDSNFGLAGLPGSPKKRVRIECKCGTES	_MDSNFGLAGLPGS(ph)PK_	CDK2_CDK3_CDK1_CDK5_group;CDK4_CDK6_group;PKC_group	CDK1;CDK2;CDK6;PRKCA;PRKCB	0.1791	0.4159	1.7013					Cdc2 kinase substrate motif;CDK kinase substrate motif;CDK1,2,4,6 kinase substrate motif;ERK1,2 kinase substrate motif;Growth associated histone HI kinase substrate motif;GSK-3, ERK1, ERK2, CDK5 substrate motif;PKA kinase substrate motif;PKC kinase substrate motif;WW domain binding motif
B4DV66	177	B4DV66	177	B4DV66;Q9BWT1;B4DLP8	177;142;100	Cell division cycle-associated protein 7	CDCA7;CDCA7;CDCA7	S			0.352758			0.352759				1	0.0150002	48.899	0.981559	48.899	17.284	790.347	0.61875	AMLAKLMSELESFPGSFRGRHPLPGSDSQSR	_LMSELESFPGS(ph)FR_	PKC_group	PRKCA;PRKCB;PRKCZ	0.4539	0.2082	2.4948					MAPKAPK2 kinase substrate motif;PKA kinase substrate motif;PKC kinase substrate motif
B4DVB8	229	B4DVB8	229	B4DVB8;Q15717	229;202	ELAV-like protein 1	ELAVL1	S			1.17287	1.25635		1.22879	0.0250288	-0.00523207		0.981068	6.44e-37	199.01	1	199.01	73.546	824.914	0.69807	PNQNKNVALLSQLYHSPARRFGGPVHHQAQR	_NVALLSQLYHS(ph)PAR_	AMPK_group;CDK2_CDK3_CDK1_CDK5_group;PKC_group	CDK1;CDK2;PRKAA2;PRKCD	0.187	0.797	1.4664	STE/STE-Unique/COT;TKL/RAF	ARAF;BRAF;COT;KSR1;KSR2;RAF1	8	3.61;3.61;3.61;3.61;3.61;3.01	Cdc2 kinase substrate motif;CDK kinase substrate motif;CDK1,2,4,6 kinase substrate motif;ERK1,2 kinase substrate motif;GSK-3, ERK1, ERK2, CDK5 substrate motif;WW domain binding motif
B4DWJ3	154	B4DWJ3	154	B4DWJ3;Q96CJ1	154;154	ELL-associated factor 2	EAF2;EAF2	S			-0.159557	-0.241356	-0.0785027	-0.145047				1	4.54e-08	130.72	1	130.72	85.1036	713.8	-0.34769	NLVKHSPSEDKMSPASPIDDIERELKAEASL	_M(ox)SPAS(ph)PIDDIER_	CK1_group;MAPK3_MAPK1_MAPK7_NLK_group	CSNK1A1;MAPK3	0.17115	0.17165	1.44775					Casein kinase II substrate motif;ERK1,2 kinase substrate motif;GSK-3, ERK1, ERK2, CDK5 substrate motif;Pyruvate dehydrogenase kinase substrate motif;WW domain binding motif
B4DWJ3	22	B4DWJ3	22	B4DWJ3;Q96CJ1;F8WCI9;F8WF04	22;22;22;22	ELL-associated factor 2	EAF2;EAF2;EAF2;EAF2	S		+	-0.656149	-0.500973	-0.500953	-0.507726				1	3.04e-06	132.5	1	109.16	109.157	635.795	0.74104	FSHLDRRERVLKLGESFEKQPRCAFHTVRYD	_LGES(ph)FEKQPR_	PKC_group	PRKCA;PRKCB	0.2039	0.16505	1.42955					b-Adrenergic Receptor kinase substrate motif;Casein kinase II substrate motif;PKA kinase substrate motif
B4DWW4	756	B4DWW4	756	B4DWW4;P25205;J3KQ69;Q7Z6P5	756;711;665;206	DNA replication licensing factor MCM3	MCM3;MCM3;MCM3	S			-0.107539	-0.105054	-0.0680145	-0.0933403		0.0102069		0.859488	6.8e-26	177.6	0.986992	177.6	18.801	961.372	-1.246	QPDAKDGDSYDPYDFSDTEEEMPQVHTPKTA	_DGDSYDPYDFS(ph)DTEEEMPQVHTPK_	CK2_group	CSNK2A1	0.4831	0.3502	2.3712					Casein kinase II substrate motif
B4DWW4	713	B4DWW4	713	B4DWW4;P25205;J3KQ69;Q7Z6P5	713;668;622;163	DNA replication licensing factor MCM3	MCM3;MCM3;MCM3	S			0.350045	0.235237	-0.108239	0.235237		0.0102069		0.859488	1.81e-05	93.684	0.666666	93.684	0	1344.47	0.14195	YFKKVLEKEKKRKKRSEDESETEDEEEKSQE	_S(ph)EDES(ph)ETEDEEEKSQEDQEQK_	CaMKII_group;CDK4_CDK6_group;CK2_group;DNAPK;PAK_group	CAMK2A;CDK4;CSNK2A1;HYRC;PAK1	0.0829	0.3502	2.2011					BARD1 BRCT domain binding motif;Casein kinase II substrate motif;G protein-coupled receptor kinase 1 substrate motif;GSK3 kinase substrate motif;Pim1 kinase substrate sequence;PKA kinase substrate motif;PKC kinase substrate motif
B4DWW4	717	B4DWW4	717	B4DWW4;P25205;J3KQ69;Q7Z6P5	717;672;626;167	DNA replication licensing factor MCM3	MCM3;MCM3;MCM3	S			0.253747	0.136716	-0.0301625	0.136716		0.0102069		0.859488	1.8e-68	232.32	1	232.32	90.8231	948.68	-0.19763	VLEKEKKRKKRSEDESETEDEEEKSQEDQEQ	_SEDES(ph)ET(ph)EDEEEKSQEDQEQKR_	CK1_group;CK2_group	CSNK1A1;CSNK2A1	0.30445	0.2653	1.8638					b-Adrenergic Receptor kinase substrate motif;Casein kinase I substrate motif;Casein kinase II substrate motif;G protein-coupled receptor kinase 1 substrate motif;MAPKAPK2 kinase substrate motif
B4DWW4	773	B4DWW4	773	B4DWW4;P25205;J3KQ69;Q7Z6P5	773;728;682;223	DNA replication licensing factor MCM3	MCM3;MCM3;MCM3	S			-0.119683	-0.360046	-0.176218	-0.176218		0.0102069		0.859488	6.47e-32	194.12	0.999978	194.12	46.6483	744.672	0.92275	TEEEMPQVHTPKTADSQETKESQKVELSESR	_TADS(ph)QETKESQKVELSESR_	ATM_ATR_group;CDK4_CDK6_group;CK1_group;DNAPK	ATM;ATR;CDK4;CSNK1A1;HYRC	0.1215	0.4701	4.7928					ATM kinase substrate motif;b-Adrenergic Receptor kinase substrate motif;Casein kinase I substrate motif;Casein kinase II substrate motif;DNA dependent Protein kinase substrate motif;PKA kinase substrate motif
B4DWW4	49	B4DWW4	49	B4DWW4;P25205	49;4	DNA replication licensing factor MCM3	MCM3;MCM3	T			0.199123	0.282143	0.241962	0.241962		0.0102069		0.859488	0.0033023	64.394	1	53.995	53.9948	704.84	0.39524	RDFGGGSSLAAGMAGTVVLDDVELREAQRDY	_(ac)AGT(ph)VVLDDVELR_	CDK4_CDK6_group;DAPK_group;TTK	CDK4;DAPK1;TTK	0.1121	0.586	5.3199
B4DWW4	758	B4DWW4	758	B4DWW4;P25205;J3KQ69;Q7Z6P5	758;713;667;208	DNA replication licensing factor MCM3	MCM3;MCM3;MCM3	T								0.0102069		0.859488	0.00172646	51.586	0.464346	51.586	0.263172	993.359	-0.43059	DAKDGDSYDPYDFSDTEEEMPQVHTPKTADS	_DGDSYDPYDFS(ph)DT(ph)EEEM(ox)PQVHTPK_	CDK4_CDK6_group;CK2_group;DAPK_group;TTK	CDK4;CSNK2A1;DAPK1;TTK	0.0717	0.50625	2.2246					b-Adrenergic Receptor kinase substrate motif;Casein kinase II substrate motif;G protein-coupled receptor kinase 1 substrate motif
B4DWW4	767	B4DWW4	767	B4DWW4;P25205;J3KQ69;Q7Z6P5	767;722;676;217	DNA replication licensing factor MCM3	MCM3;MCM3;MCM3	T			-0.0642989	0.00460933	-0.092048	-0.0642989		0.0102069		0.859488	1.97e-12	113.65	0.999998	113.65	56.5682	1481.54	-2.1803	PYDFSDTEEEMPQVHTPKTADSQETKESQKV	_DGDSYDPYDFS(ph)DTEEEMPQVHT(ph)PK_	CDK2_CDK3_CDK1_CDK5_group;CDK4_CDK6_group;DAPK_group;MAPK3_MAPK1_MAPK7_NLK_group;TTK	CDK1;CDK2;CDK4;DAPK1;MAPK3;TTK	0.11685	0.7225	3.7495					Casein kinase I substrate motif;G protein-coupled receptor kinase 1 substrate motif;Growth associated histone HI kinase substrate motif;GSK-3, ERK1, ERK2, CDK5 substrate motif;PKA kinase substrate motif;PKC kinase substrate motif;WW domain binding motif
B4DWW4	719	B4DWW4	719	B4DWW4;P25205;J3KQ69;Q7Z6P5	719;674;628;169	DNA replication licensing factor MCM3	MCM3;MCM3;MCM3	T			0.0812032	0.0601858	0.057277	0.057277		0.0102069		0.859488	1.8e-68	232.32	1	232.32	83.4652	948.68	-0.19763	EKEKKRKKRSEDESETEDEEEKSQEDQEQKR	_SEDES(ph)ET(ph)EDEEEKSQEDQEQKR_	CDK4_CDK6_group;CK1_group;CK2_group;DAPK_group;TTK	CDK4;CSNK1A1;CSNK2A1;DAPK1;TTK	0.1121	0.4265	2.3712					b-Adrenergic Receptor kinase substrate motif;Casein kinase I substrate motif;Casein kinase II substrate motif;G protein-coupled receptor kinase 1 substrate motif
B4DWW4	753	B4DWW4	753	B4DWW4;P25205;J3KQ69;Q7Z6P5	753;708;662;203	DNA replication licensing factor MCM3	MCM3;MCM3;MCM3	Y			-0.0708453	-0.148913		-0.109872		0.0102069		0.859488	9.63e-06	94.006	0.745473	94.006	4.73976	993.359	0.86656	KTRQPDAKDGDSYDPYDFSDTEEEMPQVHTP	_DGDSYDPY(ph)DFSDTEEEM(ox)PQVHT(ph)PK_										SHP1 phosphatase substrate motif;Src kinase substrate motif
B4DY08	240	B4DY08	240	B4DY08;G3V4W0	240;240		HNRNPC;HNRNPC	S			-0.0512795	0.400319		0.400319				1	1.66e-05	64.127	1	64.127	64.1271	1167.75	-1.4214	SSSSVKKDETNVKMESEGGADDSAEEGDLLD	_MES(ph)EGGADDS(ph)AEEGDLLDDDDNEDRGDDQVK_	CK2_group	CSNK2A1;CSNK2A2	0.1866	0.619	5.38105					b-Adrenergic Receptor kinase substrate motif;G protein-coupled receptor kinase 1 substrate motif;PKA kinase substrate motif;PKC kinase substrate motif
B4DY08	247	B4DY08	247	B4DY08;G3V4W0	247;247		HNRNPC;HNRNPC	S			-0.093956	-0.00351005	-0.0774672	-0.0682564				1	1.83e-206	258.83	1	64.127	64.1271	1167.75	-1.4214	DETNVKMESEGGADDSAEEGDLLDDDDNEDR	_MES(ph)EGGADDS(ph)AEEGDLLDDDDNEDRGDDQVK_	CK1_group;CK2_group	CSNK1A1;CSNK2A1;CSNK2A2	0.421	0.619	8.4222					b-Adrenergic Receptor kinase substrate motif;Casein kinase II substrate motif
B4DY52	176	B4DY52	176	B4DY52	176		PIP5K1A	S			-0.197931			-0.197931				1	8.58e-11	92.211	0.999998	92.211	57.3014	646.645	0.31375	SLKLQSQSSPIKRKASEDLEQDSAISVIPRC	_KAS(ph)EDLEQDSAISVIPR_	CaMKII_group;PKA_group	CAMK2A;PRKACA	0.2142	0.07475	1.61015					14-3-3 domain binding motif;Calmodulin-dependent protein kinase II substrate motif;Calmodulin-dependent protein kinase IV substrate motif;Chk1 kinase substrate motif;G protein-coupled receptor kinase 1 substrate motif;Pim1 kinase substrate sequence;PKA kinase substrate motif;PKC epsilon kinase substrate motif;PKC kinase substrate motif
B4DYH1	811	B4DYH1	811	B4DYH1;Q92598;B4DY72;Q5TBM3	811;809;628;73	Heat shock protein 105 kDa	HSPH1;HSPH1;HSPH1;HSPH1	S			-0.0555913	-0.0664576	-0.0446723	-0.0579022		0.11836		0.103215	1.03e-05	147.74	1	86.467	86.4671	426.227	0.34944	NTCEPVVTQPKPKIESPKLERTPNGPNIDKK	_PKIES(ph)PKLER_	CK2_group	CSNK2A2	0.0166	0.753	1.3278					b-Adrenergic Receptor kinase substrate motif;ERK1,2 kinase substrate motif;Growth associated histone HI kinase substrate motif;GSK-3, ERK1, ERK2, CDK5 substrate motif;PKA kinase substrate motif;PKC kinase substrate motif;WW domain binding motif
B4DYX9	258	B4DYX9	258	B4DYX9;P18615;B4DUN1;A2ABK2;A2ABK1;E9PD43	258;251;221;251;246;246	Negative elongation factor E	RDBP;RDBP;RDBP;RDBP;RDBP;RDBP	S			0.226632	0.330099	0.156914	0.226632				1	0.0029954	72.29	0.999577	67.519	33.737	615.275	0.20937	RDRDRDREGPFRRSDSFPERRAPRKGNTLYV	_RSDS(ph)FPERR_	CaMKII_group;PAK_group;PKC_group	CAMK2A;PAK1;PRKCB	0.1491	0.1793	1.3541					14-3-3 domain binding motif;b-Adrenergic Receptor kinase substrate motif;Calmodulin-dependent protein kinase II alpha substrate motif;Calmodulin-dependent protein kinase II substrate motif;Calmodulin-dependent protein kinase IV substrate motif;Casein kinase II substrate motif;Doublecortin kinase-1 kinase substrate motif;PKA kinase substrate motif;PKC kinase substrate motif;ZIP kinase substrate mo…
B4DYX9	122	B4DYX9	122	B4DYX9;P18615;B4DUN1;A2ABK2;A2ABK1;E9PD43;A2ABK4	122;115;115;115;115;115;115	Negative elongation factor E	RDBP;RDBP;RDBP;RDBP;RDBP;RDBP;RDBP	S			0.203765	0.116631	0.138028	0.153935				1	2.6e-85	276.64	0.999999	218.78	59.4359	752.296	0.16676	EKGPVPTFQPFQRSISADDDLQESSRRPQRK	_SIS(ph)ADDDLQ(de)ESSR_	CaMKII_group;PAK_group	CAMK2A;PAK1	0.13735	0.21915	1.5411					14-3-3 domain binding motif;Calmodulin-dependent protein kinase II substrate motif;Calmodulin-dependent protein kinase IV substrate motif;Casein kinase II substrate motif;PKA kinase substrate motif;PKC kinase substrate motif;Pyruvate dehydrogenase kinase substrate motif
B4DYX9	56	B4DYX9	56	B4DYX9;P18615;B4DUN1;A2ABK2;A2ABK1;E9PD43;A2ABK4	56;49;49;49;49;49;49	Negative elongation factor E	RDBP;RDBP;RDBP;RDBP;RDBP;RDBP;RDBP	S				0.218967		0.218967				1	1.78e-07	111.13	0.5	111.13	0	994.432	-0.4871	KQSSSSTTSQGGVKRSLSEQPVMDTATATEQ	_S(ph)LSEQ(de)PVMDTATATEQAK_										Casein kinase II substrate motif;PKA kinase substrate motif;PKC kinase substrate motif
B4DYX9	58	B4DYX9	58	B4DYX9;P18615;B4DUN1;A2ABK2;A2ABK1;E9PD43;A2ABK4	58;51;51;51;51;51;51	Negative elongation factor E	RDBP;RDBP;RDBP;RDBP;RDBP;RDBP;RDBP	S			0.258579	0.146786	0.19774	0.185359				1	2.32e-31	182.58	0.994612	174.55	22.6623	993.94	-0.19144	SSSSTTSQGGVKRSLSEQPVMDTATATEQAK	_SLS(ph)EQPVMDTATATEQAK_	CaMKII_group;PAK_group	CAMK2A;PAK1	0.1549	0.21915	1.59855					14-3-3 domain binding motif;AMP-activated protein kinase substrate motif;Calmodulin-dependent protein kinase I substrate motif;Calmodulin-dependent protein kinase II substrate motif;Calmodulin-dependent protein kinase IV substrate motif;Chk1 kinase substrate motif;G protein-coupled receptor kinase 1 substrate motif;PKA kinase substrate motif;PKC kinase substrate motif
B4DYX9	138	B4DYX9	138	B4DYX9;P18615;A2ABK2;A2ABK4	138;131;131;131	Negative elongation factor E	RDBP;RDBP;RDBP;RDBP	S			0.574538	0.219835		0.397255				1	4.31e-10	136.33	0.999995	136.33	53.6753	728.803	-0.13854	ADDDLQESSRRPQRKSLYESFVSSSDRLREL	_S(ph)LYESFVSSSDR_	PAK_group;PKA_group;PKC_group	PAK1;PRKACA;PRKCB	0.1907	0.1793	1.3186					Casein kinase I substrate motif;Casein kinase II substrate motif;G protein-coupled receptor kinase 1 substrate motif;GSK3 kinase substrate motif;PKA kinase substrate motif;PKC kinase substrate motif
B4DYX9	360	B4DYX9	360	B4DYX9;P18615;B4DUN1	360;353;323	Negative elongation factor E	RDBP;RDBP;RDBP	S			0.764941	0.688941		0.728574				1	1.89e-22	171.71	1	159.04	80.3485	726.848	-0.25842	AATGKSVWGSLAVQNSPKGCHRDKRTQIVYS	_SVWGSLAVQNS(ph)PK_	CDK2_CDK3_CDK1_CDK5_group	CDK1	0.2429	0.3843	1.3207					ERK1,2 kinase substrate motif;Growth associated histone HI kinase substrate motif;GSK-3, ERK1, ERK2, CDK5 substrate motif;PKA kinase substrate motif;PKC kinase substrate motif;WW domain binding motif
B4DZD6	579	B4DZD6	579	B4DZD6;Q49AN0	579;558	Cryptochrome-2	CRY2	S			-0.340276	-0.326299	-0.530948	-0.340276				1	0.000927789	83.617	0.998477	83.617	28.1651	515.752	-0.044138	SMSSAGPRPLPSGPASPKRKLEAAEEPPGEE	_PLPSGPAS(ph)PK_	CDK2_CDK3_CDK1_CDK5_group;CK1_group;GSK3_group;MAPK3_MAPK1_MAPK7_NLK_group;PKC_group	CDK1;CSNK1D;CSNK1E;GSK3B;MAPK1;MAPK3;PRKCA;PRKCB	0.141	0.42815	1.8269	CMGC/GSK	GSK3A	4.01	2.21	Cdc2 kinase substrate motif;CDK kinase substrate motif;CDK1,2,4,6 kinase substrate motif;ERK1,2 kinase substrate motif;Growth associated histone HI kinase substrate motif;GSK-3, ERK1, ERK2, CDK5 substrate motif;MAPKAPK2 kinase substrate motif;PKA kinase substrate motif;PKC kinase substrate motif;WW domain binding motif
B4DZM7	404	B4DZM7	404	B4DZM7;E9PFK9;Q9UJ41;E7ERJ8	404;403;607;430	Rab5 GDP/GTP exchange factor	RABGEF1;RABGEF1;RABGEF1;KCTD7	S			-0.0738487			-0.0738487				1	6.93e-05	78.429	0.665727	78.429	7.44614	946.752	0.44265	NLSQEDFDRYMSGQTSPRKQEAESWSPDACL	_LDAQSLNLSQEDFDRYMSGQTS(ph)PR_										Cdc2 kinase substrate motif;CDK kinase substrate motif;CDK1,2,4,6 kinase substrate motif;ERK1,2 kinase substrate motif;Growth associated histone HI kinase substrate motif;GSK-3, ERK1, ERK2, CDK5 substrate motif;MAPKAPK2 kinase substrate motif;PKA kinase substrate motif;PKC kinase substrate motif;WW domain binding motif
B4DZM7	127	B4DZM7	127	B4DZM7;E9PFK9;Q9UJ41;E7ERJ8	127;126;291;153	Rab5 GDP/GTP exchange factor	RABGEF1;RABGEF1;RABGEF1;KCTD7	S			-0.0318724	0.277509	0.593402	0.277509				1	1.61e-05	109.84	1	52.576	52.5758	432.89	0.42622	VTTVKKFFSASSRVGSKKEIQEAKAPSPSIN	_VGS(ph)KKEIQEAK_	CaMKII_group;PKC_group	CAMK2A;PRKCA;PRKCB;PRKCZ	0.3288	0.1957	1.56725					14-3-3 domain binding motif;Calmodulin-dependent protein kinase II substrate motif;Casein kinase II substrate motif;MAPKAPK2 kinase substrate motif;PKA kinase substrate motif;PKC kinase substrate motif
B4E0G8	26	B4E0G8	26	B4E0G8;Q96G03	26;165	Phosphoglucomutase-2	PGM2;PGM2	S			0.0453032	-0.0156221	0.012068	0.0159257		0.067914		0.7104	6.89e-23	168.69	0.999704	158.64	35.2784	536.914	-0.063141	TVSHLKLCAGIMITASHNPKQDNGYKVYWDN	_LCAGIM(ox)ITAS(ph)HNPK_	PKGcGK_group	PRKG1	0.0283	0.496	1.6862
B4E0G8	24	B4E0G8	24	B4E0G8;Q96G03	24;163	Phosphoglucomutase-2	PGM2;PGM2	T				-0.457712		-0.457712		0.067914		0.7104	0.00254974	46.337	0.54366	46.337	0.760395	797.362	1.7206	PFTVSHLKLCAGIMITASHNPKQDNGYKVYW	_LCAGIMIT(ph)ASHN(de)PK_	PKGcGK_group	PRKG1	0.02	0.496	1.4509
B4E0Y9	4	B4E0Y9	4	B4E0Y9;Q9P289;Q8NBY1	4;4;4	Serine/threonine-protein kinase MST4	MST4;MST4;MST4	S			0.0427844	-0.128787	-0.0160014	-0.009321				1	2.38e-12	120.67	1	119.22	115.477	1407.66	-2.312	____________MAHSPVAVQVPGMQNNIAD	_(ac)AHS(ph)PVAVQVPGMQNNIADPEELFTK_	JNK_group	MAPK8	0.0581	0.4619	1.157					ERK1,2 kinase substrate motif;GSK-3, ERK1, ERK2, CDK5 substrate motif;WW domain binding motif
B4E0Y9	347	B4E0Y9	347	B4E0Y9;Q9P289;Q8NBY1	347;325;325	Serine/threonine-protein kinase MST4	MST4;MST4;MST4	S			-0.577444			-0.577444				1	9.54e-06	107.98	0.67981	107.98	4.09634	899.383	-0.54682	DSESTSRENNTHPEWSFTTVRKKPDPKKVQN	_ENNTHPEWS(ph)FTTVR_										Casein kinase I substrate motif;Casein kinase II substrate motif
B4E0Y9	194	B4DR80;B4E0Y9	153;194	B4DR80;B4E0Y9;Q9P289;Q8NBY1;Q9Y6E0;O00506;H0Y630;A8K6Z3;B7Z9K1;H7C279;C9J232;C9JCC0;C9J6L2;C9JDH9;C9JJV0	153;194;172;172;184;168;90;91;74;50;74;74;72;74;74	Serine/threonine-protein kinase MST4;Serine/threonine-protein kinase 24;Serine/threonine-protein kinase 24 36 kDa subunit;Serine/threonine-protein kinase 24 12 kDa subunit;Serine/threonine-protein kinase 25	STK24;MST4;MST4;MST4;STK24;STK25;STK24;STK25;STK25;STK25;STK25;STK25;STK25;STK25;STK25	T			-0.173759	-0.373383	0.311038	-0.176381				1	4.13e-82	253.11	0.999638	253.11	34.4144	638.322	0.19453	DVKLADFGVAGQLTDTQIKRNTFVGTPFWMA;EVKLADFGVAGQLTDTQIKRNTFVGTPFWMA	_LADFGVAGQLTDT(ph)QIKR_	ATM_ATR_group;MST_group;YSK_group	ATM;KRS1;STK24;STK25;STK3	0.0169	0.864	1.4282					b-Adrenergic Receptor kinase substrate motif;b-Adrenergic Receptor kinase substrate motif
B4E0Y9	349	B4E0Y9	349	B4E0Y9;Q9P289;Q8NBY1	349;327;327	Serine/threonine-protein kinase MST4	MST4;MST4;MST4	T			-0.519507			-0.519507				1	5.71e-05	98.165	0.63905	98.165	4.15423	599.925	0.42321	ESTSRENNTHPEWSFTTVRKKPDPKKVQNGA	_ENNTHPEWSFT(ph)TVR_	LKB1;MST_group;PKC_group;ROCK_group;YSK_group	KRS1;PRKCA;PRKCB;PRKCZ;ROCK1;STK11;STK24;STK25;STK3	0.0574	0.558	2.2016
B4E173	28	B4E173	28	B4E173	28		PLXDC1	S			-0.0562962	-0.0799964	0.0430645	-0.0562962				1	0.00777615	53.403	0.996951	44.294	28.1555	506.235	0.33694	FLVPRPQPTRSQDAPSPRLPLSSAPAPCRHK	_PQPTRSQDAPS(ph)PR_	CK1_group	CSNK1A1	0.1323	0.1651	1.3564					Casein kinase I substrate motif;DNA dependent Protein kinase substrate motif;ERK1,2 kinase substrate motif;G protein-coupled receptor kinase 1 substrate motif;Growth associated histone HI kinase substrate motif;GSK-3, ERK1, ERK2, CDK5 substrate motif;PKA kinase substrate motif;PKC kinase substrate motif;WW domain binding motif
B4E1K0	615	B4E1K0;Q02241	615;902	B4E1K0;Q02241	615;902	Kinesin-like protein KIF23	KIF23;KIF23	S			0.461005	0.342327	0.379066	0.342327				1	3.64e-07	100.66	0.969446	65.171	16.0758	839.382	-0.82191	GQSVQFTDIETLKQESPNGSRKRRSSTVAPA	_GGGQSVQFTDIETLKQES(ph)PN(de)GSR_	CDK2_CDK3_CDK1_CDK5_group	CDK1	0.195	0.84	7.7973					b-Adrenergic Receptor kinase substrate motif;Casein kinase I substrate motif;ERK1,2 kinase substrate motif;G protein-coupled receptor kinase 1 substrate motif;GSK3 kinase substrate motif;GSK-3, ERK1, ERK2, CDK5 substrate motif;PKA kinase substrate motif;PKC kinase substrate motif;WW domain binding motif
B4E1K0	499	B4E1K0	499	B4E1K0	499		KIF23	S										1	0.000420118	66.592	0.459989	56.298	0	1170.59	-0.4332	ERPSRERDREKVTQRSVSPSPVPLLFQPDQN	_S(ph)VSPSPVPLLFQPDQ(de)NAPPIR_	AuroraA;CaMKII_group;CK1_group;PAK_group	AURKA;CAMK2A;CSNK1A1;CSNK1D;PAK1	0.1124	0.364	1.3796					Casein kinase II substrate motif;G protein-coupled receptor kinase 1 substrate motif;GSK3 kinase substrate motif
B4E1K0	501	B4E1K0	501	B4E1K0	501		KIF23	S			0.0258793			0.0258793				1	4.58e-06	109.41	0.745202	109.41	5.56944	1170.09	-0.17468	PSRERDREKVTQRSVSPSPVPLLFQPDQNAP	_SVS(ph)PSPVPLLFQPDQNAPPIR_	CDK2_CDK3_CDK1_CDK5_group;MAPK3_MAPK1_MAPK7_NLK_group	CDK1;MAPK1;MAPK3	0.2707	0.3014	1.7579					14-3-3 domain binding motif;Calmodulin-dependent protein kinase II substrate motif;Casein kinase II substrate motif;ERK1,2 kinase substrate motif;GSK-3, ERK1, ERK2, CDK5 substrate motif;PKA kinase substrate motif;PKC kinase substrate motif;WW domain binding motif
B4E1K0	503	B4E1K0	503	B4E1K0	503		KIF23	S			0.142609		0.0695647	0.10608				1	2.64e-05	95.122	0.867384	73.036	9.46368	1170.59	-0.09921	RERDREKVTQRSVSPSPVPLLFQPDQNAPPI	_SVSPS(ph)PVPLLFQPDQ(de)NAPPIR_	CDK2_CDK3_CDK1_CDK5_group;MAPK3_MAPK1_MAPK7_NLK_group	CDK1;MAPK1;MAPK3	0.2814	0.3014	1.8959					DNA dependent Protein kinase substrate motif;ERK1,2 kinase substrate motif;GSK-3, ERK1, ERK2, CDK5 substrate motif;MAPKAPK2 kinase substrate motif;WW domain binding motif
B4E1K0	580	B4E1K0;Q02241	580;867	B4E1K0;Q02241;H7BYN4	580;867;860	Kinesin-like protein KIF23	KIF23;KIF23;KIF23	S			-0.096468			-0.0964681				1	1.8e-54	219.22	1	219.22	77.9115	1022.95	-0.38078	LAKCEKYMLTHQELASDGEIETKLIKGDIYK	_YMLTHQELAS(ph)DGEIETK_	CK1_group;CK2_group	CSNK1D;CSNK2A1	0.25905	0.36505	1.3606					Casein kinase I substrate motif;Casein kinase II substrate motif
B4E1K0	197	B4E1K0;Q02241	197;380	B4E1K0;H0YKQ5;Q02241;H7BYN4	197;183;380;380	Kinesin-like protein KIF23	KIF23;KIF23;KIF23;KIF23	Y			0.166715	-0.139283	0.115433	0.115433				1	0.0510387	30.587	0.951852	30.587	15.9288	746.298	-1.1317	MTLRTCMDVLRENQMYGTNKMVPYRDSKLTH	_ENQMY(ph)GT(ph)NKM(ox)VPYRDSK_										FRIP PTB domain binding motif;Src kinase substrate motif
B4E2P2	11	B4E2P2	11	B4E2P2;Q9UNL2;C9JA28	11;11;11	Translocon-associated protein subunit gamma	SSR3;SSR3;SSR3	S			-0.0387175	0.309875		0.0996319				1	0.00106925	64.394	0.999999	64.394	62.0318	894.396	0.22187	_____MAPKGSSKQQSEEDLLLQDFSRNLSA	_QQS(ph)EEDLLLQDFSR_	CK2_group	CSNK2A1	0.3456	0.3615	1.9871					Casein kinase II substrate motif;G protein-coupled receptor kinase 1 substrate motif;MAPKAPK2 kinase substrate motif;PKA kinase substrate motif;PKC kinase substrate motif;Pyruvate dehydrogenase kinase substrate motif
B5MBX0	21	B5MBX0	21	B5MBX0;Q96FF9	21;21	Sororin	CDCA5;CDCA5	S			0.0238941	-0.0890065	-0.0343376	-0.045625				1	2.47e-05	124.42	0.999993	118.48	51.7914	401.552	-0.89641	TRSGGAAQRSGPRAPSPTKPLRRSQRKSGSE	_APS(ph)PTKPLRR_	CDK2_CDK3_CDK1_CDK5_group;MAPK3_MAPK1_MAPK7_NLK_group	CDK5;MAPK3	0.2655	0.3219	2.6514					14-3-3 domain binding motif;Calmodulin-dependent protein kinase II substrate motif;Casein kinase II substrate motif;Cdc2 kinase substrate motif;CDK kinase substrate motif;CDK1,2,4,6 kinase substrate motif;DNA dependent Protein kinase substrate motif;ERK1,2 kinase substrate motif;G protein-coupled receptor kinase 1 substrate motif;GSK-3, ERK1, ERK2, CDK5 substrate motif;PKA kinase substrate motif;…
B5MBX0	75	B5MBX0	75	B5MBX0;Q96FF9;H0YCL8	75;75;22	Sororin	CDCA5;CDCA5;CDCA5	S	+		1.03654	0.646163	1.00963	1.00963				1	5.62e-08	129.46	1	46.663	46.6633	551.95	1.2196	LKRIVAHAVEVPAVQSPRRSPRISFFLEKEN	_IVAHAVEVPAVQ(de)S(ph)PR_	CDK2_CDK3_CDK1_CDK5_group;PKC_group	CDK5;PRKCA;PRKCB	0.2284	0.143	2.3178					Casein kinase I substrate motif;Cdc2 kinase substrate motif;CDK kinase substrate motif;CDK1,2,4,6 kinase substrate motif;ERK1,2 kinase substrate motif;G protein-coupled receptor kinase 1 substrate motif;Growth associated histone HI kinase substrate motif;GSK3 kinase substrate motif;GSK-3, ERK1, ERK2, CDK5 substrate motif;PKA kinase substrate motif;PKC kinase substrate motif;WW domain binding motif
B5MBZ0	144	B5MBZ0	144	B5MBZ0;Q9HC35	144;144	Echinoderm microtubule-associated protein-like 4	EML4;EML4	S			-0.0245459			-0.0245459				1	4.34e-05	105.32	0.999999	105.32	61.7898	945.419	-1.0417	KEESHSNDQSPQIRASPSPQPSSQPLQIHRQ	_AS(ph)PS(ph)PQPSSQPLQIHR_	MAPK3_MAPK1_MAPK7_NLK_group	MAPK1;MAPK3	0.2569	0.351	1.6688					Casein kinase II substrate motif;ERK1,2 kinase substrate motif;GSK-3, ERK1, ERK2, CDK5 substrate motif;PKA kinase substrate motif;PKC kinase substrate motif;WW domain binding motif
B5MBZ0	146	B5MBZ0	146	B5MBZ0;Q9HC35	146;146	Echinoderm microtubule-associated protein-like 4	EML4;EML4	S			-0.319118	-0.337029	-0.111134	-0.150097				1	2.52e-05	110.77	0.999997	105.32	55.3513	945.419	-1.0417	ESHSNDQSPQIRASPSPQPSSQPLQIHRQTP	_AS(ph)PS(ph)PQPSSQPLQIHR_	MAPK3_MAPK1_MAPK7_NLK_group	MAPK3	0.1852	0.3438	1.4744					Casein kinase I substrate motif;DNA dependent Protein kinase substrate motif;ERK1,2 kinase substrate motif;G protein-coupled receptor kinase 1 substrate motif;GSK3 kinase substrate motif;GSK-3, ERK1, ERK2, CDK5 substrate motif;WW domain binding motif
B5MBZ0	176	B5MBZ0	176	B5MBZ0;Q9HC35	176;176	Echinoderm microtubule-associated protein-like 4	EML4;EML4	S										1	2.64e-05	95.631	0.999983	95.631	47.7165	596.808	1.6842	PESKNATPTKSIKRPSPAEKSHNSWENSDDS	_SIKRPS(ph)PAEK_										Casein kinase II substrate motif;DNA dependent Protein kinase substrate motif;ERK1,2 kinase substrate motif;GSK-3, ERK1, ERK2, CDK5 substrate motif;PAK2 kinase substrate motif;PKA kinase substrate motif;PKC kinase substrate motif;WW domain binding motif
B5MCU0	363	B5MCU0	363	B5MCU0;H7C0E9;B5MCG9;Q9Y2K5;E9PAL1;B7ZL65;F8WA40;H0YIX9	363;114;349;349;76;10;76;219	R3H domain-containing protein 2	R3HDM2;R3HDM2;R3HDM2;R3HDM2;R3HDM2;R3HDM2;R3HDM2;R3HDM2	S			0.000432815	0.20364	-0.0309877	0.000432744				1	0.000224808	89.466	0.992653	89.466	23.904	659.824	0.61443	DGSVRSMRPPVTKASSFSGISILTRGDSIGS	_ASS(ph)FSGISILTR_	PAK_group;PKC_group	PAK1;PRKCA;PRKCB	0.1621	0.0779	1.1889					Calmodulin-dependent protein kinase II substrate motif;Casein kinase II substrate motif;Chk1 kinase substrate motif;MDC1 BRCT domain binding motif;PKA kinase substrate motif;PKC kinase substrate motif;Plk1 PBD domain binding motif
B5MCU0	869	B5MCU0	869	B5MCU0;H7C0E9;B5MCG9;Q9Y2K5;E9PAL1;B7ZL65	869;620;889;855;582;550	R3H domain-containing protein 2	R3HDM2;R3HDM2;R3HDM2;R3HDM2;R3HDM2;R3HDM2	S			-0.248725	0.481506	-0.600949	-0.248725				1	1.55e-32	190.24	0.998317	185.02	28.3499	771.364	-1.7161	LKHGNRGKRQALKSASTDLGTADVVLGRVLE	_SAS(ph)TDLGTADVVLGR_	PAK_group	PAK1	0.092	0.0779	1.0723					PKA kinase substrate motif;PKC kinase substrate motif
B5MCU0	870	B5MCU0	870	B5MCU0;H7C0E9;B5MCG9;Q9Y2K5;E9PAL1;B7ZL65	870;621;890;856;583;551	R3H domain-containing protein 2	R3HDM2;R3HDM2;R3HDM2;R3HDM2;R3HDM2;R3HDM2	T			-0.14256			-0.14256				1	0.00301035	66.022	0.525841	66.022	0.7906	514.578	0.37381	KHGNRGKRQALKSASTDLGTADVVLGRVLEV	_SAST(ph)DLGTADVVLGR_	CK1_group	CSNK1A1	0.103	0.1076	1.0556					G protein-coupled receptor kinase 1 substrate motif;MDC1 BRCT domain binding motif;PKA kinase substrate motif;Plk1 PBD domain binding motif
B5MDF5	152	B5MDF5	152	B5MDF5;P62826;J3KQE5;F5H018;B4DV51	152;135;153;131;47	GTP-binding nuclear protein Ran	RAN;RAN;RAN;RAN	S			-0.240503	-0.258011	0.00403388	-0.176838		0.0396999		0.566576	0.00298465	81.865	1	65.676	65.6761	419.702	-1.5745	CGNKVDIKDRKVKAKSIVFHRKKNLQYYDIS	_S(ph)IVFHR_	HIPK1_HIPK2_group;NEK1_NEK5_NEK3_NEK4_NEK11_NEK2_group;PAK_group;PKC_group	HIPK2;NEK3;PAK1;PRKCA;PRKCB	0.179	0.3973	1.7606					Phosphorylase kinase substrate motif;PKA kinase substrate motif;PKC kinase substrate motif
B5MEG5	282	B5MEG5	282	B5MEG5;E7EST9;O94966;E7ESU0;C9J8M4;H0YB23	282;282;244;50;330;92	Ubiquitin carboxyl-terminal hydrolase;Ubiquitin carboxyl-terminal hydrolase;Ubiquitin carboxyl-terminal hydrolase 19;Ubiquitin carboxyl-terminal hydrolase	USP19;USP19;USP19;USP19;USP19;USP19	S			0.325041			0.325041				1	0.005353	58.997	1	58.997	58.9971	793.873	0.88946	PLAGEKAVPPGNDPVSPAMVRSRNPGKDDCA	_AVPPGNDPVS(ph)PAMVR_	CDK2_CDK3_CDK1_CDK5_group	CDK1	0.1845	0.675	6.1571					Casein kinase I substrate motif;ERK1,2 kinase substrate motif;GSK-3, ERK1, ERK2, CDK5 substrate motif;WW domain binding motif
B7WP27	61	B7WP27	61	B7WP27;Q9HCG8;B7WP74	61;61;61	Pre-mRNA-splicing factor CWC22 homolog	CWC22;CWC22;CWC22	S			-0.0282045	0.110497	0.0054719	0.0210533				1	1.83e-06	121.95	0.999812	121.95	38.0861	677.758	-0.17418	FDYSRSDYEHSRRGRSYDSSMESRNRDREKR	_GRS(ph)YDSSMESR_	CaMKII_group;PAK_group;PKC_group	CAMK2A;PAK1;PRKCB	0.1655	0.1935	1.3617					14-3-3 domain binding motif;Calmodulin-dependent protein kinase II substrate motif;Casein kinase I substrate motif;Casein kinase II substrate motif;G protein-coupled receptor kinase 1 substrate motif;GSK3 kinase substrate motif;PKA kinase substrate motif;PKC kinase substrate motif;ZIP kinase substrate motif
B7WP27	28	B7WP27	28	B7WP27;Q9HCG8;B7WP74	28;28;28	Pre-mRNA-splicing factor CWC22 homolog	CWC22;CWC22;CWC22	S			0.0882773	0.102725	0.109829	0.102725				1	9.86e-05	93.583	0.999301	64.87	32.4793	713.611	0.050645	GHDRRENLNSYQRNSSPEDRYEEQERSPRDR	_NSS(ph)PEDRYEEQERS(ph)PR_										14-3-3 domain binding motif;Calmodulin-dependent protein kinase II substrate motif;Calmodulin-dependent protein kinase IV substrate motif;Casein kinase II substrate motif;ERK1,2 kinase substrate motif;GSK-3, ERK1, ERK2, CDK5 substrate motif;MDC1 BRCT domain binding motif;PKA kinase substrate motif;PKC kinase substrate motif;Plk1 PBD domain binding motif;Pyruvate dehydrogenase kinase substrate mot…
B7WP27	39	B7WP27	39	B7WP27;Q9HCG8;B7WP74	39;39;39	Pre-mRNA-splicing factor CWC22 homolog	CWC22;CWC22;CWC22	S			0.801241	0.102725	0.109829	0.801241				1	9.86e-05	95.205	0.999997	95.205	57.6501	686.955	-0.58299	QRNSSPEDRYEEQERSPRDRDYFDYSRSDYE	_NSSPEDRYEEQERS(ph)PR_										Casein kinase II substrate motif;ERK1,2 kinase substrate motif;Growth associated histone HI kinase substrate motif;GSK-3, ERK1, ERK2, CDK5 substrate motif;PKA kinase substrate motif;PKC kinase substrate motif;Pyruvate dehydrogenase kinase substrate motif;WW domain binding motif
B7WP27	786	B7WP27	786	B7WP27;Q9HCG8	786;786	Pre-mRNA-splicing factor CWC22 homolog	CWC22;CWC22	S			0.000576886	-0.112085	-0.140857	-0.112085				1	1.39e-06	124.47	0.999913	124.47	40.5922	688.79	-0.37866	NSSGSNWRDPITKYTSDKDVPSERNNYSRVA	_YTS(ph)DKDVPSER_	PKC_group	PRKCA;PRKCB;PRKCZ	0.2388	0.1452	1.2028					Calmodulin-dependent protein kinase II substrate motif;Casein kinase II substrate motif;Chk1 kinase substrate motif;PKA kinase substrate motif;PKC kinase substrate motif;Pyruvate dehydrogenase kinase substrate motif
B7WPE2	177	B7WPE2	177	B7WPE2;Q32P44;H0Y3M3;G3V1D0	177;176;170;148	Echinoderm microtubule-associated protein-like 3	EML3;EML3;EML3;EML3	S			-0.104853	-0.0989072	0.0224743	-0.0346183				1	9.03e-20	193.23	0.999904	185.25	40.1653	562.297	0.59142	SPSERPRQKLSRKAISSANLLVRSGSTESRG	_AIS(ph)SANLLVR_	PAK_group;PKC_group	PAK1;PRKCB	0.12605	0.10055	1.16355					PKA kinase substrate motif;PKC kinase substrate motif
B7WPE2	882	B7WPE2	882	B7WPE2;Q32P44;G3V195;H7C355	882;881;664;122	Echinoderm microtubule-associated protein-like 3	EML3;EML3;EML3;EML3	T			0.989502			0.989502				1	0.00322439	74.048	0.863268	74.048	8.00275	729.859	0.60524	QWRVLGAGGAGPAPATPSRTPSLSPASSLDV	_VLGAGGAGPAPAT(ph)PSR_	MAPK3_MAPK1_MAPK7_NLK_group	MAPK1;MAPK3	0.2886	0.1609	1.8269					Cdc2 kinase substrate motif;CDK1,2,4,6 kinase substrate motif;ERK1,2 kinase substrate motif;G protein-coupled receptor kinase 1 substrate motif;GSK3, Erk1, Erk2 and CDK5 kinase motif;GSK-3, ERK1, ERK2, CDK5 substrate motif;WW domain binding motif
B7Z238	305	B7Z238	305	B7Z238;Q9BXK5	305;429	Bcl-2-like protein 13	BCL2L13;BCL2L13	S			-0.102744			-0.102744				1	0.00830764	56.039	0.917499	56.039	10.4625	813.861	1.2486	INAREESLVEELSPASEKKPVPPSEGKSRLS	_EESLVEELSPAS(ph)EK_	CK1_group;PKC_group	CSNK1A1;PRKCA;PRKCB;PRKCZ	0.3678	0.1338	1.8037					G protein-coupled receptor kinase 1 substrate motif;PKA kinase substrate motif;PKC kinase substrate motif
B7Z2A4	809	B7Z2A4	809	B7Z2A4;P18433;J3KP22	809;798;654	Receptor-type tyrosine-protein phosphatase alpha	PTPRA;PTPRA	Y			-0.342287			-0.342287				1	8.86e-05	111.43	0.975522	111.43	16.0046	994.938	0.42865	FCYKVVQEYIDAFSDYANFK___________	_VVQEYIDAFSDY(ph)ANFK_	InsR_group;Src_group	FGR;FYN;INSR;SRC;SRMS	0.0331	0.933	2.6997					EGFR kinase substrate motif;Grb2 SH2 domain binding motif;Itk SH2 domain binding motif;Src kinase substrate motif;TC-PTP phosphatase substrate motif
B7Z4A7	309	B7Z4A7	309	B7Z4A7;P34910	309;294	Protein EVI2B	EVI2B;EVI2B	S			-0.149841	-0.408187		-0.149841				1	1.43e-24	150.91	0.956836	150.91	13.4572	901.878	-0.027434	KSTLLADDLEIKLFESSENIEDSNNPKTEKI	_LFES(ph)SENIEDSNNPK_										AMP-activated protein kinase substrate motif;b-Adrenergic Receptor kinase substrate motif;Casein kinase II substrate motif;PKA kinase substrate motif
B7Z4A7	310	B7Z4A7	310	B7Z4A7;P34910	310;295	Protein EVI2B	EVI2B;EVI2B	S										1	1.18e-14	89.846	0.901348	89.846	9.60852	901.878	1.0942	STLLADDLEIKLFESSENIEDSNNPKTEKIK	_LFESS(ph)ENIEDSNNPK_										G protein-coupled receptor kinase 1 substrate motif;MDC1 BRCT domain binding motif;Plk1 PBD domain binding motif
B7Z4A7	283	B7Z4A7	283	B7Z4A7;P34910	283;268	Protein EVI2B	EVI2B;EVI2B	S			-0.182983	-0.413557		-0.19413				1	6.47e-12	135.21	0.884575	130.05	8.84504	591.962	-0.8692	CMDNIRENEISTKRTSIISLTPWKPSKSTLL	_RTS(ph)IIS(ph)LTPWKPSK_	PAK_group;PKA_group;PKC_group	PAK1;PRKACA;PRKCB	0.1907	0.2038	1.3186					Aurora-A kinase substrate motif;Casein kinase I substrate motif;Casein kinase II substrate motif;PAK2 kinase substrate motif;Phosphorylase kinase substrate motif;PKA kinase substrate motif;PKC kinase substrate motif
B7Z4A7	286	B7Z4A7	286	B7Z4A7;P34910	286;271	Protein EVI2B	EVI2B;EVI2B	S			-0.182983	-0.144792		-0.182983				1	6.47e-12	135.21	0.999338	124.69	31.7594	591.962	0.053803	NIRENEISTKRTSIISLTPWKPSKSTLLADD	_RTS(ph)IIS(ph)LTPWKPSK_	CK1_group;PAK_group;PKC_group	CSNK1A1;PAK1;PRKCB	0.1255	0.1591	1.1712					Casein kinase II substrate motif
B7Z6G2	591	B7Z6G2	591	B7Z6G2;B1ALK7;Q14155;E9PDQ5	591;516;694;438	Rho guanine nucleotide exchange factor 7	ARHGEF7;ARHGEF7;ARHGEF7;ARHGEF7	S			0.0856966	0.124461	-0.150049	0.0856966				1	1.27e-33	213.67	1	213.67	163.446	623.261	-0.10936	TMKKLLPKRKPERKPSDEEFASRKSTAALEE	_KPS(ph)DEEFASR_	AuroraA;CaMKII_group;GRK_group;MAP2K_group;PAK_group;PKA_group;PKC_group	ADRBK1;AURKA;CAMK2A;MAP2K1;PAK2;PRKACA;PRKCZ	0.0161	0.655	1.3725					14-3-3 domain binding motif;BARD1 BRCT domain binding motif;Calmodulin-dependent protein kinase II substrate motif;Casein kinase II substrate motif;DNA dependent Protein kinase substrate motif;PKA kinase substrate motif;PKA, PKG kinase substrate motif;PKC epsilon kinase substrate motif;PKC kinase substrate motif;PKG kinase substrate motif
B7Z6G2	154	B7Z6G2	154	B7Z6G2;B1ALK7;Q14155;E7EUY6;E7EU80	154;79;257;79;79	Rho guanine nucleotide exchange factor 7	ARHGEF7;ARHGEF7;ARHGEF7;ARHGEF7;ARHGEF7	S			-0.100252	-0.0269104	-0.077452	-0.100252				1	1.48e-31	183.09	0.999998	183.09	58.0504	647.994	0.38339	KASEKPVSPKSGTLKSPPKGFDTTAINKSYY	_SGTLKS(ph)PPKGFDTTAINK_	AuroraA;CDK2_CDK3_CDK1_CDK5_group;CK1_group;GRK_group;GSK3_group;JNK_group;MAP2K_group;MAPK3_MAPK1_MAPK7_NLK_group;PAK_group;PKC_group	ADRBK1;AURKA;CDK1;CSNK1A1;GSK3A;GSK3B;MAP2K1;MAPK1;MAPK3;MAPK8;PAK2;PRKCZ	0.0253	0.7885	2.6982					Cdc2 kinase substrate motif;CDK kinase substrate motif;CDK1,2,4,6 kinase substrate motif;ERK1, ERK2, SAPK, CDK5 and GSK3 kinase substrate motif;ERK1,2 kinase substrate motif;Growth associated histone HI kinase substrate motif;GSK-3, ERK1, ERK2, CDK5 substrate motif;WW domain binding motif
B7Z6K7	87	B7Z6K7	87	B7Z6K7;Q9H707	87;86	Putative uncharacterized zinc finger protein 814;Zinc finger protein 552	ZNF814;ZNF552	S			0.459327	0.346872	0.419107	0.368154				1	3.43e-06	140.91	1	136.27	103.167	484.22	-0.21946	YIQRETQVRTPMAGVSPKKAHPCEMCGPILG	_TPMAGVS(ph)PK_										Cdc2 kinase substrate motif;CDK kinase substrate motif;CDK1,2,4,6 kinase substrate motif;ERK1,2 kinase substrate motif;G protein-coupled receptor kinase 1 substrate motif;Growth associated histone HI kinase substrate motif;GSK-3, ERK1, ERK2, CDK5 substrate motif;PKA kinase substrate motif;PKC kinase substrate motif;WW domain binding motif
B7Z6Z4	150	B7Z6Z4	150	B7Z6Z4;G3V1V0;G8JLA2;J3KND3;P60660;F8W1R7;F8VPF3	150;57;58;58;57;57;45	Myosin light polypeptide 6	MYL6;MYL6;MYL6;MYL6;MYL6;MYL6	S			0.0977456	-0.366522	-0.225869	-0.225869		-0.0205453		0.853441	0.00193162	65.943	1	65.943	65.943	755.852	1.0548	NPTNAEVLKVLGNPKSDEMNVKVLDFEHFLP	_VLGNPKS(ph)DEMNVK_	ROCK_group	ROCK2	0.0184	0.899	1.7492					Casein kinase II substrate motif
B7Z7Q0	258	B7Z7Q0	258	B7Z7Q0;P48739	258;256	Phosphatidylinositol transfer protein beta isoform	PITPNB;PITPNB	T			-0.475595			-0.475595		0.27262		0.151929	1.86e-06	112.3	0.99999	112.3	49.9216	573.904	0.073183	EDIRRMEDETQKELETMRKRGSVRGTSAADV	_MEDETQKELET(ph)MR_	PKC_group	PRKCA;PRKCB;PRKCZ	0.4331	0.1909	2.4948					b-Adrenergic Receptor kinase substrate motif;Casein kinase I substrate motif;PKA kinase substrate motif;PKC kinase substrate motif
B7Z888	683	B7Z888	683	B7Z888;Q9UPN6	683;617	Protein SCAF8	SCAF8;SCAF8	S			-0.118132	-0.0899121	0.10165	0.00776959				1	9.28e-115	280.75	0.998958	280.75	30.1271	1126.54	1.1974	VKSSEPVKETVQTTQSPTPVEKETVVTTQAE	_SSEPVKETVQTTQS(ph)PTPVEK_	CK1_group;MAPK3_MAPK1_MAPK7_NLK_group	CSNK1A1;MAPK3	0.15905	0.1247	1.30855					Casein kinase II substrate motif;ERK1,2 kinase substrate motif;GSK-3, ERK1, ERK2, CDK5 substrate motif;WW domain binding motif
B7ZKQ9	465	B7ZKQ9	465	B7ZKQ9	465		SCARB1	S			-0.376732			-0.376732				1	1.14e-10	140.66	0.987193	121.25	19.6457	683.646	-1.4435	KKGSKDKEAIQAYSESLMTSAPKGSVLQEAK	_DKEAIQAYSES(ph)LMTSAPK_	PKC_group	PRKCA;PRKCB	0.1621	0.34735	1.22725					b-Adrenergic Receptor kinase substrate motif;Casein kinase I substrate motif;Casein kinase II substrate motif;G protein-coupled receptor kinase 1 substrate motif;GSK3 kinase substrate motif
B7ZKQ9	474	B7ZKQ9	474	B7ZKQ9	474		SCARB1	S			-0.128708	0.198243	-0.354575	-0.128708				1	0.00248822	71.153	1	69.451	69.4507	512.757	1.5066	IQAYSESLMTSAPKGSVLQEAKL________	_GS(ph)VLQEAKL_	PKGcGK_group	PRKG1	0.045	0.3983	1.2411					PKA kinase substrate motif;PKC kinase substrate motif
B7ZKU0	251	B7ZKU0	251	B7ZKU0;B7ZKU2;Q17RM7;Q7Z589;B7ZKT8;E9PMC9	251;251;237;236;250;237	Protein EMSY	C11orf30;C11orf30;C11orf30;EMSY;C11orf30;C11orf30	S					0.599699	0.599699		1.07813	+	9.22508e-48	0.00134658	77.078	0.59106	77.078	1.61601	583.297	-0.75971	PKAVVPVSKTITVPVSGSPKMSNIMQSIANS	_TITVPVS(ph)GSPK_	MAPK3_MAPK1_MAPK7_NLK_group;PAK_group	MAPK1;MAPK3;PAK1	0.2316	0.2931	1.6519					Casein kinase II substrate motif
B7ZKU0	253	B7ZKU0	253	B7ZKU0;B7ZKU2;Q17RM7;Q7Z589;B7ZKT8;E9PMC9	253;253;239;238;252;239	Protein EMSY	C11orf30;C11orf30;C11orf30;EMSY;C11orf30;C11orf30	S			0.543199	0.658463		0.658463		1.07813	+	9.22508e-48	0.00125324	77.776	0.75752	63.16	5.04412	583.297	-0.13529	AVVPVSKTITVPVSGSPKMSNIMQSIANSLP	_TITVPVSGS(ph)PK_	PKC_group	PRKCB	0.108	0.2377	1.0012					Casein kinase I substrate motif;ERK1,2 kinase substrate motif;G protein-coupled receptor kinase 1 substrate motif;Growth associated histone HI kinase substrate motif;GSK3 kinase substrate motif;GSK-3, ERK1, ERK2, CDK5 substrate motif;PKA kinase substrate motif;PKC kinase substrate motif;WW domain binding motif
B7ZLA8	352	B7ZLA8	352	B7ZLA8;Q9C0E8;F5H2Q7	352;321;246	Protein lunapark	KIAA1715;LNP;KIAA1715	S					0.0920721	0.0920721				1	0.00603913	60.255	1	60.255	60.2551	616.789	0.26907	PARKTRPQAPRLPEFSFEKRQVVEGSSSVGP	_LPEFS(ph)FEKR_										Casein kinase II substrate motif
B7ZLA8	213	B7ZLA8	213	B7ZLA8;Q9C0E8;F5H2Q7	213;213;138	Protein lunapark	KIAA1715;LNP;KIAA1715	T					0.642933	0.642933				1	0.00996518	63.76	0.981298	63.76	17.2793	717.871	-0.1422	PKDSSAPGGPPERTVTPALSSNVLPRHLGSP	_TVT(ph)PALSSNVLPR_										Calmodulin-dependent protein kinase II substrate motif;G protein-coupled receptor kinase 1 substrate motif;GSK-3, ERK1, ERK2, CDK5 substrate motif;PKC kinase substrate motif;WW domain binding motif
B8ZZC6	10	B8ZZC6	10	B8ZZC6;A0PJW8	10;10	Death-associated protein-like 1	DAPL1;DAPL1	S			0.453228	-0.148753	0.257856	0.257855	0.520045			1	0.0134232	52.265	1	45.115	45.1154	661.311	0.66838	______MANEVQDLLSPRKGGHPPAVKAGGM	_ANEVQDLLS(ph)PR_	MAPK3_MAPK1_MAPK7_NLK_group	MAPK3	0.1447	0.0552	1.0657					Casein kinase I substrate motif;Cdc2 kinase substrate motif;CDK kinase substrate motif;CDK1,2,4,6 kinase substrate motif;ERK1,2 kinase substrate motif;Growth associated histone HI kinase substrate motif;GSK-3, ERK1, ERK2, CDK5 substrate motif;PKA kinase substrate motif;PKC kinase substrate motif;WW domain binding motif
B8ZZN6	2	B8ZZN6	2	B8ZZN6;P63165;B9A032;B8ZZJ0	2;2;2;2	Small ubiquitin-related modifier 1	SUMO1;SUMO1;SUMO1;SUMO1	S			0.0100636	-0.0398887	0.00633396	0		0.25544		0.179055	2.77e-106	277.8	1	177.12	94.8563	623.942	0.21928	______________MSDQEAKPSTEDLGDKK	_(ac)S(ph)DQEAKPSTEDLGDKK_	CDK4_CDK6_group;CK2_group;PDHK_group	BCKDK;CDK4;CDK6;CSNK2A1	0.0363	0.762	3.1922					Casein kinase II substrate motif;G protein-coupled receptor kinase 1 substrate motif
B8ZZS0	9	B8ZZS0	9	B8ZZS0;Q9NYM9;H7BXT7;E9PHY4	9;9;9;9	BET1-like protein	BET1L;BET1L;BET1L;BET1L	S			-0.197435	-0.24684	-0.249222	-0.237507				1	2.36e-42	202.16	1	59.469	59.4691	664.984	0.12475	_______MADWARAQSPGAVEEILDRENKRM	_AQS(ph)PGAVEEILDREN(de)KR_										14-3-3 domain binding motif;Calmodulin-dependent protein kinase II substrate motif;ERK1,2 kinase substrate motif;GSK-3, ERK1, ERK2, CDK5 substrate motif;PKA kinase substrate motif;PKC kinase substrate motif;WW domain binding motif
B8ZZS0	37	B8ZZS0	37	B8ZZS0;Q9NYM9;H7BXT7;E9PQJ6	37;37;37;14	BET1-like protein	BET1L;BET1L;BET1L;BET1L	S			0.313942			0.313942				1	0.000319832	72.145	1	72.145	72.1453	684.663	0.43113	KRMADSLASKVTRLKSLALDIDRDAEDQNRY	_LKS(ph)LALDIDRDAEDQNR_	CaMKII_group;PAK_group	CAMK2A;PAK1	0.15685	0.04025	1.6012					14-3-3 domain binding motif;Calmodulin-dependent protein kinase II alpha substrate motif;Calmodulin-dependent protein kinase II substrate motif;Calmodulin-dependent protein kinase IV substrate motif;Chk1 kinase substrate motif;Phosphorylase kinase substrate motif;PKA kinase substrate motif;PKC kinase substrate motif
B9EK38	795	B9EK38	795	B9EK38;Q6GYQ0	795;795	Ral GTPase-activating protein subunit alpha-1	GARNL1;RALGAPA1	S										1	0.0113281	51.348	0.322217	51.348	0	874.393	0.54389	NEVFGALNEEQPLPRSSSTSDILEPFTVERA	_S(ph)SSTSDILEPFTVER_										Casein kinase I substrate motif;Casein kinase II substrate motif;G protein-coupled receptor kinase 1 substrate motif;GSK3 kinase substrate motif
B9EK38	796	B9EK38	796	B9EK38;Q6GYQ0	796;796	Ral GTPase-activating protein subunit alpha-1	GARNL1;RALGAPA1	S										1	0.0113281	51.348	0.322217	51.348	0	874.393	0.54389	EVFGALNEEQPLPRSSSTSDILEPFTVERAK	_S(ph)SSTSDILEPFTVER_	PAK_group;PKA_group	PAK1;PRKACA	0.20555	0.1942	1.3095					Casein kinase I substrate motif;Casein kinase II substrate motif;MDC1 BRCT domain binding motif;PKA kinase substrate motif;PKC kinase substrate motif;Plk1 PBD domain binding motif
B9EK38	797	B9EK38	797	B9EK38;Q6GYQ0	797;797	Ral GTPase-activating protein subunit alpha-1	GARNL1;RALGAPA1	S					-0.806291	-0.806291				1	0.000263337	89.846	0.775073	89.846	8.87122	874.393	0.43377	VFGALNEEQPLPRSSSTSDILEPFTVERAKE	_SSS(ph)TSDILEPFTVER_	CaMKII_group;PAK_group	CAMK2A;PAK1	0.1495	0.1863	1.42985					14-3-3 domain binding motif;Calmodulin-dependent protein kinase I substrate motif;Calmodulin-dependent protein kinase II substrate motif;Calmodulin-dependent protein kinase IV substrate motif;Casein kinase II substrate motif;Chk1 kinase substrate motif;MDC1 BRCT domain binding motif;PKA kinase substrate motif;PKC kinase substrate motif;Plk1 PBD domain binding motif;Pyruvate dehydrogenase kinase s…
C9J0Q2	1064	C9J0Q2	1064	C9J0Q2;Q8IV33	1064;1064	Uncharacterized protein KIAA0825	KIAA0825;KIAA0825	S										1	0.00393343	38.417	0.45422	38.417	0	957.897	-1.108	GLICMCLKSIMGDQTSIHNQMIQKVIQSIEQ	_SIMGDQ(de)T(ph)SIHN(de)Q(de)MIQ(de)K_										Casein kinase I substrate motif
C9J0Q2	1063	C9J0Q2	1063	C9J0Q2;Q8IV33	1063;1063	Uncharacterized protein KIAA0825	KIAA0825;KIAA0825	T										1	0.00393343	38.417	0.45422	38.417	0	957.897	-1.108	LGLICMCLKSIMGDQTSIHNQMIQKVIQSIE	_SIMGDQ(de)T(ph)SIHN(de)Q(de)MIQ(de)K_
C9J3L7	84	C9J3L7	84	C9J3L7;Q9BWE0;C9JYJ8;C9JZE3;E7EVL6	84;27;87;86;27	Replication initiator 1	REPIN1;REPIN1;REPIN1;REPIN1;REPIN1	S			1.55983	0.446997	1.47591	1.47591				1	7.51e-11	133.62	0.99624	133.62	24.236	811.395	-0.076336	MGLAQPRLLSGPSQESPQTLGKESRGLRQQG	_LLSGPSQES(ph)PQTLGK_	CDK2_CDK3_CDK1_CDK5_group	CDK1;CDK2	0.2576	0.4535	1.7045					b-Adrenergic Receptor kinase substrate motif;Casein kinase I substrate motif;Casein kinase II substrate motif;ERK1,2 kinase substrate motif;GSK-3, ERK1, ERK2, CDK5 substrate motif;WW domain binding motif
C9J6P4	273	C9J6P4	273	C9J6P4;Q7Z2W4	273;273	Zinc finger CCCH-type antiviral protein 1	ZC3HAV1;ZC3HAV1	T	+		0.886511	0.935761	0.899098	0.905274				1	5.29e-13	148.03	0.999947	147.24	42.7825	772.784	-0.61111	QEFLASASASAERSCTPSPDQISHRASLEDA	_SCT(ph)PS(ph)PDQISHR_	MAPK3_MAPK1_MAPK7_NLK_group	MAPK3	0.2108	0.1596	1.5497	CMGC	CDKL1;CDKL2;CDKL4;CDKL5;CLK1;CLK2;CLK3;CLK4;ICK;MAK;MSSK1;SRPK2	3.29	2.59;2.59;2.59;2.59;2.59;2.59;2.59;2.59;2.59;2.59;2.59;2.59;2.59;2.59;2.59;2.59;2.59;2.59;2.59;2.59;2.59;2.59;2.59;2.59	Calmodulin-dependent protein kinase II substrate motif;GSK-3, ERK1, ERK2, CDK5 substrate motif;PKC kinase substrate motif;WW domain binding motif
C9J6P4	284	C9J6P4	284	C9J6P4;Q7Z2W4	284;284	Zinc finger CCCH-type antiviral protein 1	ZC3HAV1;ZC3HAV1	S			-0.0569114	-0.481404	-0.346922	-0.346922				1	4.11e-08	115.5	1	115.5	105.126	741.33	-0.49355	ERSCTPSPDQISHRASLEDAPVDDLTRKFTY	_AS(ph)LEDAPVDDLTR_	PAK_group;PKA_group	PAK1;PRKACA	0.2247	0.1847	1.30795					Casein kinase II substrate motif;G protein-coupled receptor kinase 1 substrate motif;MAPKAPK2 kinase substrate motif;PKA kinase substrate motif;PKC kinase substrate motif;Pyruvate dehydrogenase kinase substrate motif
C9J6P4	872	C9J6P4	872	C9J6P4;Q7Z2W4	872;750	Zinc finger CCCH-type antiviral protein 1	ZC3HAV1;ZC3HAV1	S			-0.0219215	0.267356	0.192699	0.186501				1	0.0146984	61.11	1	61.11	61.1103	646.801	2.7826	HLHPEYVRVSEHFKASMKNFKIEKIKKIENS	_AS(ph)M(ox)KN(de)FKIEK_	PKC_group	PRKCA;PRKCB;PRKCZ	0.452	0.1237	2.4948					PKA kinase substrate motif;PKC kinase substrate motif
C9J6P4	257	C9J6P4	257	C9J6P4;Q7Z2W4	257;257	Zinc finger CCCH-type antiviral protein 1	ZC3HAV1;ZC3HAV1	S			0.505688	0.373175	0.37829	0.424385				1	1.34e-74	235.68	1	175.77	100.656	1007.43	0.51107	AYRARSKSRDRFFQGSQEFLASASASAERSC	_FFQGS(ph)Q(de)EFLASASASAER_										ATM kinase substrate motif;Casein kinase II substrate motif;DNA dependent Protein kinase substrate motif
C9J6P4	335	C9J6P4	335	C9J6P4;Q7Z2W4	335;335	Zinc finger CCCH-type antiviral protein 1	ZC3HAV1;ZC3HAV1	S			0.165172			0.165172				1	7.79e-05	58.823	0.820644	58.823	10.063	1138.85	0.025213	GTSQAGTSQRFLENGSQEDLLHGNPGSTYLA	_FLENGS(ph)QEDLLHGNPGSTYLASNSTSAPNWK_										ATM kinase substrate motif;Casein kinase I substrate motif;Casein kinase II substrate motif;DNA dependent Protein kinase substrate motif;Pyruvate dehydrogenase kinase substrate motif
C9J6P4	302	C9J6P4	302	C9J6P4;Q7Z2W4	302;302	Zinc finger CCCH-type antiviral protein 1	ZC3HAV1;ZC3HAV1	S			-0.529531	-0.304523		-0.41702				1	1.44e-05	126.48	0.999994	126.48	52.5574	647.795	0.38786	DAPVDDLTRKFTYLGSQDRARPPSGSSKATD	_KFTYLGS(ph)QDR_	PKC_group	PRKCA;PRKCB	0.1988	0.1216	1.39725					ATM kinase substrate motif;DNA dependent Protein kinase substrate motif;G protein-coupled receptor kinase 1 substrate motif
C9J6P4	378	C9J6P4	378	C9J6P4;Q7Z2W4	378;378	Zinc finger CCCH-type antiviral protein 1	ZC3HAV1;ZC3HAV1	S			0.0203421	-0.00455164	0.0368901	0.0203422				1	1.02e-10	145.81	0.999728	145.81	35.6587	620.31	0.13779	TSWTNDQGARRKTVFSPTLPAARSSLGSLQT	_TVFS(ph)PTLPAAR_										Casein kinase II substrate motif;ERK1,2 kinase substrate motif;G protein-coupled receptor kinase 1 substrate motif;GSK-3, ERK1, ERK2, CDK5 substrate motif;PKA kinase substrate motif;WW domain binding motif
C9J6P4	275	C9J6P4	275	C9J6P4;Q7Z2W4	275;275	Zinc finger CCCH-type antiviral protein 1	ZC3HAV1;ZC3HAV1	S			0.66512	0.396269	0.332393	0.396269				1	5.29e-13	148.03	1	147.24	71.0866	772.784	-0.61111	FLASASASAERSCTPSPDQISHRASLEDAPV	_SCT(ph)PS(ph)PDQISHR_										DNA dependent Protein kinase substrate motif;ERK1,2 kinase substrate motif;GSK-3, ERK1, ERK2, CDK5 substrate motif;MAPKAPK2 kinase substrate motif;WW domain binding motif
C9J6P4	386	C9J6P4	386	C9J6P4;Q7Z2W4	386;386	Zinc finger CCCH-type antiviral protein 1	ZC3HAV1;ZC3HAV1	S			0.484293	0.426426	0.326652	0.426426				1	3.2e-16	149.73	0.5	149.73	0	813.89	-0.20387	ARRKTVFSPTLPAARSSLGSLQTPEAVTTRK	_S(ph)SLGSLQTPEAVTTR_	CaMKII_group;PAK_group	CAMK2A;PAK1	0.09055	0.13915	1.06795					Casein kinase I substrate motif;G protein-coupled receptor kinase 1 substrate motif;GSK3 kinase substrate motif
C9J6P4	387	C9J6P4	387	C9J6P4;Q7Z2W4	387;387	Zinc finger CCCH-type antiviral protein 1	ZC3HAV1;ZC3HAV1	S			0.484293	0.426426	0.326652	0.426426				1	3.2e-16	149.73	0.5	149.73	0	813.89	-0.20387	RRKTVFSPTLPAARSSLGSLQTPEAVTTRKG	_S(ph)SLGSLQTPEAVTTR_	PAK_group;PKA_group	PAK1;PRKACA	0.2018	0.1847	1.27895					Casein kinase I substrate motif;Casein kinase II substrate motif;MDC1 BRCT domain binding motif;PKA kinase substrate motif;PKC kinase substrate motif;Plk1 PBD domain binding motif
C9J6W2	1770	C9J6W2	1770	C9J6W2;Q96Q89	1770;1740	Kinesin-like protein KIF20B	KIF20B;KIF20B	S	+		1.48052	1.23958	1.54112	1.48052				1	9.29e-24	174.65	0.986391	120.11	18.6021	892.424	0.77398	KKEGTLQKFGDFLQHSPSILQSKAKKIIETM	_FGDFLQHS(ph)PSILQSK_	CDK2_CDK3_CDK1_CDK5_group	CDK1	0.1434	0.619	5.6214					Casein kinase II substrate motif;ERK1,2 kinase substrate motif;GSK-3, ERK1, ERK2, CDK5 substrate motif;WW domain binding motif
C9J6W2	1786	C9J6W2	1786	C9J6W2;Q96Q89	1786;1756	Kinesin-like protein KIF20B	KIF20B;KIF20B	S			2.05015			2.05015				1	0.00115965	83.314	0.769587	83.314	7.61881	538.241	-1.5428	PSILQSKAKKIIETMSSSKLSNVEASKENVS	_IIETMS(ph)SSK_	TTK	TTK	0.0315	0.2358	1.1076					Casein kinase I substrate motif;Casein kinase II substrate motif
C9J837	664	C9J837	664	C9J837;Q15042;A6H8Z3	664;664;620	Rab3 GTPase-activating protein catalytic subunit	RAB3GAP1;RAB3GAP1;RAB3GAP1	S		+	-0.555863	-0.922101	-1.1769	-0.953635				1	0.000892812	80.469	0.933599	66.004	11.4799	596.28	-0.093777	DLLEEQSEVLAKLGTSAEGAHLRARMQSACL	_LGTS(ph)AEGAHLR_										Casein kinase II substrate motif;G protein-coupled receptor kinase 1 substrate motif;PKA kinase substrate motif
C9J9W2	2	C9J9W2	2	C9J9W2	2		LASP1	T	+		0.837055	0.638584	0.800082	0.756767				1	0.00912238	54.608	0.999993	54.608	53.7797	575.746	-1.425	______________MTLNMKNYKGYEKKPYC	_(ac)T(ph)LNM(ox)KN(de)YK_	PKC_group;PKGcGK_group	PRKCB;PRKG1;PRKG2	0.0199	0.538	1.7733
C9JA08	468	C9JA08	468	C9JA08;Q96D46	468;468	60S ribosomal export protein NMD3	NMD3;NMD3	S			0.320427	0.172359	0.440314	0.268554				1	1.2e-66	199.15	1	128.55	77.524	967.359	-1.4545	RKNVNIYRDSAIPVESDTDDEGAPRISLAEM	_DSAIPVES(ph)DT(ph)DDEGAPR_										b-Adrenergic Receptor kinase substrate motif;Casein kinase II substrate motif;Pyruvate dehydrogenase kinase substrate motif
C9JA08	470	C9JA08	470	C9JA08;Q96D46	470;470	60S ribosomal export protein NMD3	NMD3;NMD3	T			0.172359	0.422664	0.139077	0.139077				1	1.2e-66	167.63	1	107.47	80.4326	967.359	0.48205	NVNIYRDSAIPVESDTDDEGAPRISLAEMLE	_DSAIPVES(ph)DT(ph)DDEGAPR_										b-Adrenergic Receptor kinase substrate motif;Casein kinase I substrate motif;Casein kinase II substrate motif
C9JA93	104	C9JA93	104	C9JA93	104		TBC1D15	S										1	0.000102983	79.97	0.496346	79.97	0	1166.56	0.78067	QDKRTLLVNCQNKSLSQSFENLLDEPAYGLI	_SLS(ph)QSFENLLDEPAYGLIQK_	PAK_group;PKC_group	PAK1;PRKCB	0.13985	0.13775	1.20085					ATM kinase substrate motif;Casein kinase II substrate motif;DNA dependent Protein kinase substrate motif;PKA kinase substrate motif;PKC kinase substrate motif
C9JA93	106	C9JA93	106	C9JA93	106		TBC1D15	S										1	0.000102983	79.97	0.496346	79.97	0	1166.56	0.78067	KRTLLVNCQNKSLSQSFENLLDEPAYGLIQK	_SLS(ph)QSFENLLDEPAYGLIQK_	PKC_group	PRKCB	0.122	0.1483	1.137					Casein kinase II substrate motif;MAPKAPK2 kinase substrate motif
C9JDG0	77	C9JDG0	77	C9JDG0;Q9NSV4	77;77	Protein diaphanous homolog 3	DIAPH3;DIAPH3	S			-0.476077			-0.476077				1	0.000888103	73.11	0.999641	73.11	34.4971	853.397	-0.5847	LNIRTLTDDMLDKFASIRIPGSKKERPPLPN	_TLTDDMLDKFAS(ph)IR_	PKC_group	PRKCA;PRKCB;PRKCI;PRKCZ	0.4256	0.39825	1.92935					Calmodulin-dependent protein kinase II substrate motif;Chk1 kinase substrate motif;G protein-coupled receptor kinase 1 substrate motif;Phosphorylase kinase substrate motif;PKA kinase substrate motif;PKC kinase substrate motif
C9JE40	172	C9JE40	172	C9JE40	172	Protein PAT1 homolog 2	PATL2	S										1	0.00928092	46.178	0.962879	46.178	14.0973	1040.46	1.8617	RHQRILQQQQHSQTPSPPAKKPWSQQPDPYA	_ILQ(de)QQ(de)Q(de)HSQ(de)T(ph)PS(ph)PPAKK_										DNA dependent Protein kinase substrate motif;ERK1,2 kinase substrate motif;GSK-3, ERK1, ERK2, CDK5 substrate motif;MAPKAPK2 kinase substrate motif;WW domain binding motif
C9JE40	170	C9JE40	170	C9JE40	170	Protein PAT1 homolog 2	PATL2	T										1	0.00928092	46.178	0.962879	46.178	14.0973	1040.46	1.8617	HPRHQRILQQQQHSQTPSPPAKKPWSQQPDP	_ILQ(de)QQ(de)Q(de)HSQ(de)T(ph)PS(ph)PPAKK_										G protein-coupled receptor kinase 1 substrate motif;GSK-3, ERK1, ERK2, CDK5 substrate motif;WW domain binding motif
C9JFR5	115	C9JFR5	115	C9JFR5;P30304;C9JH94	115;116;116	M-phase inducer phosphatase 1	CDC25A;CDC25A;CDC25A	S				2.47342		2.47342				1	0.00130563	75.695	1	75.695	75.6953	597.807	-0.18974	NPMRRIHSLPKLLGCSPALKRSHSDSLDHDI	_LLGCS(ph)PALKR_	CDK2_CDK3_CDK1_CDK5_group;CDK4_CDK6_group;CDK7;HIPK1_HIPK2_group;JNK_group;NEK1_NEK5_NEK3_NEK4_NEK11_NEK2_group;ROCK_group	CDK1;CDK2;CDK3;CDK4;CDK5;CDK6;CDK7;HIPK2;MAPK8;NEK11;ROCK1	0.0476	0.752	3.7847					ERK1,2 kinase substrate motif;GSK-3, ERK1, ERK2, CDK5 substrate motif;WW domain binding motif
C9JFV4	887	C9JFV4	887	C9JFV4;I3L3A8;Q8IZL8;F8WDZ1;E7EV54	887;793;743;653;596	Proline-, glutamic acid- and leucine-rich protein 1	PELP1	S										1	6.43e-05	69.952	0.49907	69.952	0	957.446	0.58921	ENHRAGSNEDPILAPSGTPPPTIPPDETFGG	_AGSNEDPILAPS(ph)GTPPPTIPPDETFGGR_	MAPK3_MAPK1_MAPK7_NLK_group	MAPK3	0.1768	0.3967	1.7946					Casein kinase II substrate motif;DNA dependent Protein kinase substrate motif;G protein-coupled receptor kinase 1 substrate motif
C9JFV4	625	C9JFV4	625	C9JFV4;I3L3A8;Q8IZL8;F8WDZ1;E7EV54	625;531;481;479;334	Proline-, glutamic acid- and leucine-rich protein 1	PELP1	S			0.188654	0.301939	-0.209762	0.149389				1	1.46e-16	160.13	0.999988	160.13	49.3569	803.877	0.26235	ISPPADALKLRSPRGSPDGSLQTGKPSAPKK	_GS(ph)PDGSLQTGKPSAPK_	HIPK1_HIPK2_group;MAPK3_MAPK1_MAPK7_NLK_group;PKB_group	AKT1;HIPK2;MAPK3	0.0688	0.3967	1.8919					Casein kinase I substrate motif;ERK1,2 kinase substrate motif;G protein-coupled receptor kinase 1 substrate motif;GSK3 kinase substrate motif;GSK-3, ERK1, ERK2, CDK5 substrate motif;MAPKAPK2 kinase substrate motif;PKA kinase substrate motif;PKC kinase substrate motif;WW domain binding motif
C9JFV4	889	C9JFV4	889	C9JFV4;I3L3A8;Q8IZL8;F8WDZ1;E7EV54	889;795;745;655;598	Proline-, glutamic acid- and leucine-rich protein 1	PELP1	T				-0.0455506		-0.0455505				1	6.43e-05	74.605	0.791268	74.605	5.86422	957.446	0.0030248	HRAGSNEDPILAPSGTPPPTIPPDETFGGRV	_AGSNEDPILAPSGT(ph)PPPTIPPDETFGGR_	MAPK3_MAPK1_MAPK7_NLK_group	MAPK1;MAPK3	0.2948	0.40165	2.23615					Casein kinase I substrate motif;G protein-coupled receptor kinase 1 substrate motif;GSK-3, ERK1, ERK2, CDK5 substrate motif;WW domain binding motif
C9JG63	221	C9JG63	221	C9JG63;Q7Z698;H7C2T4	221;206;88	Sprouty-related, EVH1 domain-containing protein 2	SPRED2;SPRED2;SPRED2	S			0.0243196			0.0243197				1	0.00902005	54.524	1	54.524	54.5244	814.846	0.36233	HYHLDQPMPRPYRQVSFPDDDEEIVRINPRE	_QVS(ph)FPDDDEEIVR_	CaMKII_group;PAK_group	CAMK2A;PAK1	0.1613	0.2849	1.6139					14-3-3 domain binding motif;Calmodulin-dependent protein kinase II substrate motif;Casein kinase II substrate motif;PKA kinase substrate motif;PKC kinase substrate motif;Pyruvate dehydrogenase kinase substrate motif
C9JH25	533	C9JH25	533	C9JH25	533	Proline-rich transmembrane protein 4	PRRT4	S			-0.204316	0.00187425	-0.235467	-0.172441				1	0.00031283	90.759	1	65.511	65.5112	599.292	-0.84815	CWGGRRRRAGAPLGGSGFKGATPLPQGRSPF	_RAGAPLGGS(ph)GFK_
C9JIF9	185	C9JIF9	185	C9JIF9;P13798;H7C1U0;H7C393;C9JLK2	185;185;110;182;84	Acylamino-acid-releasing enzyme	APEH;APEH;APEH;APEH;APEH	S			0.00805652		0.000865329	0.00446544	0.179384	0.130799		0.48556	1.9e-22	171.67	0.99988	171.67	39.2026	721.314	0.67692	RPKAESFFQTKALDVSASDDEIARLKKPDQA	_ALDVS(ph)ASDDEIAR_										Casein kinase II substrate motif;Pyruvate dehydrogenase kinase substrate motif
C9JIF9	187	C9JIF9	187	C9JIF9;P13798;H7C1U0;H7C393;C9JLK2	187;187;112;184;86	Acylamino-acid-releasing enzyme	APEH;APEH;APEH;APEH;APEH	S			0.268195	-0.0933403	-0.0863236	-0.0863236	0.179384	0.130799		0.48556	1.66e-36	202.63	0.999651	164.63	34.5696	721.314	-0.3781	KAESFFQTKALDVSASDDEIARLKKPDQAIK	_ALDVSAS(ph)DDEIAR_										BARD1 BRCT domain binding motif;Casein kinase II substrate motif
C9JNZ1	2	C9JNZ1	2	C9JNZ1;C9JVG3;C9JWG0;C9JUW1;C9JTZ5;F2Z3H1;F8WC70;F2Z3P4;C9J3M0	2;2;2;2;2;2;2;2;2		UGP2;UGP2;UGP2;UGP2;UGP2;UGP2;UGP2;UGP2;UGP2	S			0.238053	-0.0163369	-0.0891138	-0.0231378		-0.189236		0.428332	1.63e-57	231.13	1	231.13	111.584	793.846	0.11652	______________MSQDGASQFQEVIRQEL	_(ac)S(ph)QDGASQFQEVIR_										ATM kinase substrate motif;DNA dependent Protein kinase substrate motif;G protein-coupled receptor kinase 1 substrate motif
C9JRP1	52	C9JRP1;E9PFN4	52;61	C9JRP1;Q9Y6M7;E9PFN4	52;52;61	Sodium bicarbonate cotransporter 3	SLC4A7;SLC4A7;SLC4A7	S			0.363788			0.363788				1	5.29e-17	160.64	0.691374	89.982	3.5028	884.943	0.29127	LESHRAVYIGVHVPFSKESRRRHRHRGHKHH	_AVYIGVHVPFS(ph)KESR_										Casein kinase I substrate motif;Casein kinase II substrate motif
C9JRP1	84	C9JRP1;E9PFN4	84;93	C9JRP1;Q9Y6M7;E9PFN4	84;84;93	Sodium bicarbonate cotransporter 3	SLC4A7;SLC4A7;SLC4A7	S			0.361319	0.25689	0.102053	0.25689				1	4.79e-09	110.9	0.999165	110.9	30.8411	754.976	-0.65921	RRRKDKESDKEDGRESPSYDTPSQRVQFILG	_ESDKEDGRES(ph)PSYDTPSQR_	MAPK3_MAPK1_MAPK7_NLK_group	MAPK1;MAPK3	0.2538	0.1706	1.6059					b-Adrenergic Receptor kinase substrate motif;Casein kinase II substrate motif;ERK1,2 kinase substrate motif;GSK-3, ERK1, ERK2, CDK5 substrate motif;PKA kinase substrate motif;PKC kinase substrate motif;WW domain binding motif
C9JRP1	276	C9JRP1;E9PFN4	276;396	C9JRP1;Q9Y6M7;E9PFN4	276;400;396	Sodium bicarbonate cotransporter 3	SLC4A7;SLC4A7;SLC4A7	S			0.90273	0.145091	-0.0368367	0.14509				1	1.86e-06	118.37	0.618612	75.112	0	930.346	1.4199	GNLDNSKSGEIKGNGSGGSRENSTVDFSKES;GNLDNSKSGEIKGNGSGGSRENSTVDFSKVD	_GN(de)GS(ph)GGS(ph)RENSTVDFSK_										Casein kinase I substrate motif;Casein kinase I substrate motif;Casein kinase II substrate motif;Casein kinase II substrate motif;PKA kinase substrate motif;PKA kinase substrate motif
C9JRP1	279	C9JRP1;E9PFN4	279;399	C9JRP1;Q9Y6M7;E9PFN4	279;403;399	Sodium bicarbonate cotransporter 3	SLC4A7;SLC4A7;SLC4A7	S		+	-1.32265	-0.731614	-0.667172	-0.731614				1	1.86e-06	118.37	0.958153	89.668	16.4582	593.911	-0.4629	DNSKSGEIKGNGSGGSRENSTVDFSKESASW;DNSKSGEIKGNGSGGSRENSTVDFSKVDMNF	_GN(de)GSGGS(ph)RENSTVDFSK_	CK1_group;PKC_group	CSNK1A1;PRKCA;PRKCB;PRKCZ	0.2574	0.13205	1.3068					Casein kinase II substrate motif;Casein kinase II substrate motif;G protein-coupled receptor kinase 1 substrate motif;G protein-coupled receptor kinase 1 substrate motif;GSK3 kinase substrate motif;GSK3 kinase substrate motif
C9JRP1	283	C9JRP1;E9PFN4	283;403	C9JRP1;Q9Y6M7;E9PFN4	283;407;403	Sodium bicarbonate cotransporter 3	SLC4A7;SLC4A7;SLC4A7	S			0.90273	0.145091	-0.0368367	0.0712135				1	1.47e-05	111.13	0.872489	111.13	5.80897	929.854	0.012231	SGEIKGNGSGGSRENSTVDFSKESASWHCSC;SGEIKGNGSGGSRENSTVDFSKVDMNFMRKI	_GNGS(ph)GGSRENS(ph)TVDFSK_	CaMKII_group;PAK_group	CAMK2A;PAK1	0.12025	0.12185	1.47235					14-3-3 domain binding motif;14-3-3 domain binding motif;Calmodulin-dependent protein kinase II substrate motif;Calmodulin-dependent protein kinase II substrate motif;Casein kinase II substrate motif;Casein kinase II substrate motif;MAPKAPK2 kinase substrate motif;MAPKAPK2 kinase substrate motif;PKA kinase substrate motif;PKA kinase substrate motif;PKC epsilon kinase substrate motif;PKC epsilon ki…
C9JRP1	242	C9JRP1	242	C9JRP1;Q9Y6M7	242;242	Sodium bicarbonate cotransporter 3	SLC4A7;SLC4A7	S			0.210514	0.283092	0.195096	0.240253				1	2.16e-19	180.84	1	32.008	32.0084	328.661	-1.3344	RIPLVRSFADIGKKHSDPHLLERNGILASPQ	_KHS(ph)DPHLLER_										AMP-activated protein kinase substrate motif;Calmodulin-dependent protein kinase II substrate motif;Chk1 kinase substrate motif;PKA kinase substrate motif;PKC kinase substrate motif
C9JRP1	452	C9JRP1;E9PFN4;H7C3C4	452;552;107	C9JRP1;Q9Y6M7;E9PFN4;H7C3C4	452;556;552;107	Sodium bicarbonate cotransporter 3	SLC4A7;SLC4A7;SLC4A7;SLC4A7	S			0.186374	0.09815	0.14978	0.168129				1	0.000173395	90.475	0.838092	84.181	7.99433	668.666	0.15486	VPSQEKRKIPVFHNGSTPTLGETPKEAAHHA	_KIPVFHN(de)GS(ph)TPTLGETPK_	PKC_group	PRKCB	0.137	0.1193	1.2673					AMP-activated protein kinase substrate motif;Casein kinase I substrate motif;Casein kinase II substrate motif;HMGCoA Reductase kinase substrate motif
C9JRP1	258	C9JRP1	258	C9JRP1	258		SLC4A7	S			0.207018	0.394734	0.294782	0.291368				1	9.46e-54	217.17	1	217.17	81.1927	932.428	0.30035	DPHLLERNGILASPQSAPGNLDNSKSGEIKG	_N(de)GILASPQS(ph)APGNLDNSK_	CK1_group	CSNK1A1	0.1104	0.1342	1.104
C9JRP1	233	C9JRP1	233	C9JRP1;Q9Y6M7;Q6U841;C9J240;E7EW28;F8WDX9;B7Z2J0	233;233;238;238;238;238;238	Sodium bicarbonate cotransporter 3;Sodium-driven chloride bicarbonate exchanger	SLC4A7;SLC4A7;SLC4A10;SLC4A10;SLC4A10;SLC4A10;SLC4A10	S			0.0206267	-0.0317692	-0.672658	-0.10995				1	4.83e-13	117.02	1	117.02	117.022	473.226	0.29141	HQNEKRFTSRIPLVRSFADIGKKHSDPHLLE	_S(ph)FADIGKK_	PKC_group	PRKCB	0.1452	0.1193	1.3259					Casein kinase II substrate motif;Pyruvate dehydrogenase kinase substrate motif
C9JS03	80	C9JS03	80	C9JS03;C9IYG2;C9JUB9	80;80;80		ZNF655;ZNF655;ZNF655	S			-0.175892			-0.175892				1	0.000169503	83.423	0.999825	83.423	37.5791	711.291	-0.23582	FDLETKTREVLRDDCSDGETREENKLLIPKQ	_EVLRDDCS(ph)DGETREENK_	CK1_group	CSNK1A1	0.1174	0.1398	1.3564					Casein kinase I substrate motif;Casein kinase II substrate motif;G protein-coupled receptor kinase 1 substrate motif
C9JS03	12	C9JS03	12	C9JS03;C9IYG2;C9JUB9;Q8N720;F8WDU5;C9JNK1;F8WEM9;F8WE52;C9J0V9;C9J9R2;F8WCS2;F8WEB1	12;12;12;12;12;12;12;12;12;12;12;12	Zinc finger protein 655	ZNF655;ZNF655;ZNF655;ZNF655;ZNF655;ZNF655;ZNF655;ZNF655;ZNF655;ZNF655;ZNF655;ZNF655	S				0.130799	0.311271	0.300417				1	0.000108486	89.468	1	89.468	89.4682	812.34	-0.57746	____MEEIPAQEAAGSPRVQFQSLETQSECL	_(ac)M(ox)EEIPAQEAAGS(ph)PR_	CDK4_CDK6_group	CDK4	0.1222	0.725	26.4486					ERK1,2 kinase substrate motif;Growth associated histone HI kinase substrate motif;GSK-3, ERK1, ERK2, CDK5 substrate motif;PKA kinase substrate motif;PKC kinase substrate motif;WW domain binding motif
C9JTQ0	258	C9JTQ0	258	C9JTQ0	258	Ankyrin repeat domain-containing protein 63	ANKRD63	S				0.601411		0.601411				1	0.000837965	68.567	0.877046	68.567	8.53284	865.887	0.40619	HRAQGSERPELGRSMSLALGAVTEEEAARLR	_SM(ox)S(ph)LALGAVTEEEAAR_										14-3-3 domain binding motif;Calmodulin-dependent protein kinase II alpha substrate motif;Calmodulin-dependent protein kinase II substrate motif;Calmodulin-dependent protein kinase IV substrate motif;Chk1 kinase substrate motif;Phosphorylase kinase substrate motif;PKA kinase substrate motif;PKC kinase substrate motif
C9JUH3	287	C9JUH3;Q9BSQ5	287;384	C9JUH3;Q9BSQ5	287;384	Malcavernin	CCM2;CCM2	S			-0.249839	0.128953	-0.0707695	-0.0950651				1	0.000202443	120.96	0.999647	110.66	34.5189	523.239	0.60134	LETIGVKDGRGIITDSFGRHRRALSTTSSST	_GIITDS(ph)FGR_	MAP2K_group;PKC_group;ROCK_group	MAP2K3;PRKCA;PRKCB;PRKCZ;ROCK2	0.2489	0.3983	1.7342					b-Adrenergic Receptor kinase substrate motif
C9JUH3	9	C9JUH3	9	C9JUH3	9		CCM2	S			1.62854		1.6841	1.64768				1	2.3e-05	87.429	1	51.888	51.8878	813.373	-1.3029	_______MENEPGIVSPFKRVFLKGEKSRDK	_(ac)MENEPGIVS(ph)PFKR_	MAP2K_group;MAPK3_MAPK1_MAPK7_NLK_group;p38_group;ROCK_group	MAP2K3;MAPK1;MAPK11;MAPK14;MAPK3;ROCK2	0.1482	0.864	1.75265					Cdc2 kinase substrate motif;CDK kinase substrate motif;CDK1,2,4,6 kinase substrate motif;ERK1,2 kinase substrate motif;GSK-3, ERK1, ERK2, CDK5 substrate motif;WW domain binding motif
C9JUL9	11	C9JUL9	11	C9JUL9	11		SRRT	S			0.0807941	-0.336009		0.0343566				1	3.85e-08	130.1	1	130.1	100.76	755.269	0.59053	_____MAPSDRAMGDSDDEYDRRRRDKFRRE	_AMGDS(ph)DDEYDRR_										b-Adrenergic Receptor kinase substrate motif;BARD1 BRCT domain binding motif;Casein kinase II substrate motif
C9JYA1	106	C9JYA1	106	C9JYA1;O15504;B4DT96	106;106;106	Nucleoporin-like protein 2	NUPL2;NUPL2;NUPL2	S			0.233397	0.263515	0.371057	0.286645				1	5.23e-22	143.08	0.995008	96.338	22.9971	835.367	4.5675	RKEGFGLSENPFASLSPDEQKDEKKLLEGIV	_EGFGLSENPFASLS(ph)PDEQKDEK_	MAPK3_MAPK1_MAPK7_NLK_group	MAPK3	0.1788	0.2011	1.428					Casein kinase II substrate motif;ERK1,2 kinase substrate motif;GSK-3, ERK1, ERK2, CDK5 substrate motif;WW domain binding motif
D3DQV9	395	D3DQV9	395	D3DQV9;P78344;H0Y3P2;H0YCH5	395;395;395;395	Eukaryotic translation initiation factor 4 gamma 2	EIF4G2;EIF4G2;EIF4G2;EIF4G2	S			0.0416635	0.0604624	0.186754	0.0614306		-0.0725586		0.768788	0.00390916	110.22	0.999996	110.22	53.7843	438.178	0.055245	GSGIGTGPGVIQDRFSPTMGRHRSNQLFNGH	_FS(ph)PTMGR_	CDK2_CDK3_CDK1_CDK5_group	CDK1	0.1252	0.898	8.3609					Casein kinase I substrate motif;Casein kinase II substrate motif;ERK1,2 kinase substrate motif;GSK-3, ERK1, ERK2, CDK5 substrate motif;PKA kinase substrate motif;PKC kinase substrate motif;WW domain binding motif
D3DQV9	508	D3DQV9	508	D3DQV9;P78344;H0Y3P2;E9PKF8	508;508;470;13	Eukaryotic translation initiation factor 4 gamma 2	EIF4G2;EIF4G2;EIF4G2;EIF4G2	T			-0.0740917	-0.11652	-0.0933095	-0.0915867		-0.0725586		0.768788	9.57e-11	141.53	0.999504	124.63	33.0433	829.929	0.42633	QITMIPPSAQPPRTQTPPLGQTPQLGLKTNP	_TQT(ph)PPLGQTPQLGLK_	CDK2_CDK3_CDK1_CDK5_group;MAPK3_MAPK1_MAPK7_NLK_group;TTK	CDK1;MAPK3;TTK	0.174	0.4619	2.6769					Calmodulin-dependent protein kinase II substrate motif;GSK-3, ERK1, ERK2, CDK5 substrate motif;PKC kinase substrate motif;WW domain binding motif
D3YTE0	173	D3YTE0	173	D3YTE0;Q8N9T8;H0YFD2	173;171;115	Protein KRI1 homolog	KRI1;KRI1;KRI1	S			-0.0106575	-0.0747145	0.0422241	-0.00566648				1	1.22e-68	237.22	1	127.83	79.7141	1160.48	0.51019	EQKQLKESFRAFVEDSEDEDGAGEGGSSLLQ	_AFVEDS(ph)EDEDGAGEGGSSLLQK_										b-Adrenergic Receptor kinase substrate motif;BARD1 BRCT domain binding motif;Casein kinase II substrate motif;G protein-coupled receptor kinase 1 substrate motif
D3YTE0	630	D3YTE0	630	D3YTE0;Q8N9T8	630;628	Protein KRI1 homolog	KRI1;KRI1	S			0.00273846			0.00273852				1	2.44e-14	117.6	0.999997	117.6	55.6582	997.798	-1.0093	QRQLPALDGSLMGPESPPAQEEEAPVSPHKK	_QLPALDGSLMGPES(ph)PPAQEEEAPVSPHK_	MAPK3_MAPK1_MAPK7_NLK_group	MAPK1;MAPK3	0.2886	0.15605	1.8269					b-Adrenergic Receptor kinase substrate motif;ERK1,2 kinase substrate motif;GSK-3, ERK1, ERK2, CDK5 substrate motif;WW domain binding motif
D6R919	484	D6R919	484	D6R919;P78314;H0YAD9	484;427;131	SH3 domain-binding protein 2	SH3BP2;SH3BP2;SH3BP2	S			-0.354612	0.627046	-0.574756	-0.354612				1	0.000350365	120.76	0.999987	110.53	48.9738	539.242	0.71732	HLQRSPPDGQSFRSFSFEKPRQPSQADTGGD	_SFS(ph)FEKPR_	CaMKII_group;PAK_group;PDHK_group;PKC_group	CAMK2A;PAK1;PDK1;PRKCA;PRKCB;PRKCD;PRKCE;PRKCZ	0.2437	0.39225	1.60405					14-3-3 domain binding motif;Calmodulin-dependent protein kinase II substrate motif;Casein kinase II substrate motif;G protein-coupled receptor kinase 1 substrate motif;PDK1 kinase substrate motif;PKA kinase substrate motif;PKC kinase substrate motif
D6R919	473	D6R919	473	D6R919;P78314;H0YAD9	473;416;120	SH3 domain-binding protein 2	SH3BP2;SH3BP2;SH3BP2	S			0.338681	0.0437644	0.0844725	0.162081				1	0.00139027	88.338	1	88.338	73.8921	535.719	-0.2629	VLPRPEKPQLPHLQRSPPDGQSFRSFSFEKP	_S(ph)PPDGQSFR_	MAPK3_MAPK1_MAPK7_NLK_group	MAPK3	0.1068	0.4083	1.0778					Casein kinase II substrate motif;ERK1,2 kinase substrate motif;Growth associated histone HI kinase substrate motif;GSK-3, ERK1, ERK2, CDK5 substrate motif;Pyruvate dehydrogenase kinase substrate motif;WW domain binding motif
D6RE05	517	D6RE05	517	D6RE05;E9PCK9	517;476		MLIP;MLIP	S			-0.127762			-0.127762				1	0.010447	85.676	0.983584	85.676	17.7785	412.202	0.26907	QASSSLASMNVERTPSPTLKSNTMLSLLQTS	_TPS(ph)PTLK_										14-3-3 domain binding motif;Calmodulin-dependent protein kinase II substrate motif;Calmodulin-dependent protein kinase IV substrate motif;Casein kinase II substrate motif;Chk1 kinase substrate motif;DNA dependent Protein kinase substrate motif;ERK1,2 kinase substrate motif;GSK-3, ERK1, ERK2, CDK5 substrate motif;PKA kinase substrate motif;PKC kinase substrate motif;WW domain binding motif
D6REX3	799	D6REX3	799	D6REX3;O94979;B7ZL00;H7BXG7;D6RHZ5;H0YAB3	799;799;760;532;799;416	Protein transport protein Sec31A	SEC31A;SEC31A;SEC31A;SEC31A;SEC31A;SEC31A	S			-0.124928	0.0641931	-0.368831	-0.133163				1	7.22e-11	138.22	1	138.22	82.6263	672.986	-0.9005	DRLCRAQGEPVAGHESPKIPYEKQQLPKGRP	_AQGEPVAGHES(ph)PKIPYEK_	GSK3_group;MAPK3_MAPK1_MAPK7_NLK_group	GSK3A;MAPK3	0.09015	0.64005	1.9534					b-Adrenergic Receptor kinase substrate motif;ERK1,2 kinase substrate motif;G protein-coupled receptor kinase 1 substrate motif;Growth associated histone HI kinase substrate motif;GSK-3, ERK1, ERK2, CDK5 substrate motif;PKA kinase substrate motif;PKC kinase substrate motif;WW domain binding motif
D6REX3	1194	D6REX3	1194	D6REX3;O94979;B7ZL00;H7BXG7;H0Y8W8	1194;1163;1109;912;326	Protein transport protein Sec31A	SEC31A;SEC31A;SEC31A;SEC31A;SEC31A	S			-0.103271	-0.184572	-0.415769	-0.103271				1	2e-23	177.4	0.997629	177.4	26.7138	959.475	0.97516	KRLEFLYDKLREQTLSPTITSGLHNIARSIE	_EQTLS(ph)PTITSGLHNIAR_	GSK3_group;MAPK3_MAPK1_MAPK7_NLK_group	GSK3A;MAPK3	0.1259	0.64005	2.2399					Casein kinase I substrate motif;Casein kinase II substrate motif;ERK1,2 kinase substrate motif;G protein-coupled receptor kinase 1 substrate motif;GSK-3, ERK1, ERK2, CDK5 substrate motif;WW domain binding motif
D6REX3	1192	D6REX3	1192	D6REX3;O94979;B7ZL00;H7BXG7;H0Y8W8	1192;1161;1107;910;324	Protein transport protein Sec31A	SEC31A;SEC31A;SEC31A;SEC31A;SEC31A	T			-0.0946183			-0.0946183				1	2.21e-15	155.11	0.499985	155.11	0	639.986	0.30651	ASKRLEFLYDKLREQTLSPTITSGLHNIARS	_EQT(ph)LSPTITSGLHNIAR_	CaMKII_group;GSK3_group	CAMK2A;GSK3A	0.08555	0.53765	2.3238					Calmodulin-dependent protein kinase II substrate motif;Casein kinase I substrate motif;G protein-coupled receptor kinase 1 substrate motif;p70 Ribosomal S6 kinase substrate motif;PKC kinase substrate motif
D6RFG8	11	D6RFG8	11	D6RFG8;P27707;D6RCP9;D6RG38	11;11;11;11	Deoxycytidine kinase	DCK;DCK;DCK;DCK	S			-0.124597	0.00791302		-0.0583828		-0.667447		0.0046042	0.000876701	76.82	0.646276	76.82	3.54055	726.777	0.91644	_____MATPPKRSCPSFSASSEGTRIKKISI	_SCPS(ph)FSASSEGTR_	PAK_group;PKC_group	PAK1;PRKCA;PRKCB	0.1893	0.3142	1.5888					Casein kinase II substrate motif;DNA dependent Protein kinase substrate motif;G protein-coupled receptor kinase 1 substrate motif;GSK3 kinase substrate motif
D6RFG8	74	D6RFG8	74	D6RFG8;P27707;D6RCP9	74;74;74	Deoxycytidine kinase	DCK;DCK;DCK	S			-0.208761			-0.208761		-0.667447		0.0046042	1.26e-10	139.46	0.990211	139.46	20.0499	813.999	-0.079364	CNVQSTQDEFEELTMSQKNGGNVLQMMYEKP	_WCNVQSTQDEFEELTMS(ph)QK_	PKC_group	PRKCA;PRKCB;PRKCZ	0.2793	0.3147	2.4948					ATM kinase substrate motif;DNA dependent Protein kinase substrate motif;PKA kinase substrate motif;PKC kinase substrate motif
D6W592	35	D6W592	35	D6W592;Q8WVV9;B7WPG3;C9IYN3;Q5JB52	35;35;35;35;35	Heterogeneous nuclear ribonucleoprotein L-like	HNRPLL;HNRPLL;HNRPLL;HNRPLL;HNRPLL	S			0.0370308	-0.0309877	-0.0314447	-0.0288667				1	2.27e-98	275.2	1	225.34	131.02	769.004	0.045051	SQAKRLKTEEGEIDYSAEEGENRREATPRGG	_LKTEEGEIDYS(ph)AEEGENRR_	CK1_group	CSNK1A1	0.1207	0.1107	1.3564					Casein kinase II substrate motif
D6W592	61	D6W592	61	D6W592;Q8WVV9;B7WPG3;C9IYN3;Q5JB52	61;61;61;61;61	Heterogeneous nuclear ribonucleoprotein L-like	HNRPLL;HNRPLL;HNRPLL;HNRPLL;HNRPLL	S										1	0.00174377	61.265	0.990464	61.265	20.1767	724.801	0.24585	TPRGGGDGGGGGRSFSQPEAGGSHHKVSVSP	_SFS(ph)QPEAGGSHHK_	CaMKII_group;PAK_group	CAMK2A;PAK1	0.14435	0.13595	1.4456					14-3-3 domain binding motif;ATM kinase substrate motif;Calmodulin-dependent protein kinase II substrate motif;Casein kinase II substrate motif;DNA dependent Protein kinase substrate motif;G protein-coupled receptor kinase 1 substrate motif;PKA kinase substrate motif;PKC kinase substrate motif
D6W592	2	D6W592	2	D6W592;Q8WVV9;B7WPG3;C9IYN3;Q5JB52	2;2;2;2;2	Heterogeneous nuclear ribonucleoprotein L-like	HNRPLL;HNRPLL;HNRPLL;HNRPLL;HNRPLL	S										1	0.00536966	42.106	0.308284	42.106	0	892.031	0.78952	______________MSSSSSSPRETYEEDRE	_(ac)S(ph)SSSSSPRETYEEDREYESQAK_										Casein kinase I substrate motif;Casein kinase II substrate motif;G protein-coupled receptor kinase 1 substrate motif;GSK3 kinase substrate motif
D6W592	3	D6W592	3	D6W592;Q8WVV9;B7WPG3;C9IYN3;Q5JB52	3;3;3;3;3	Heterogeneous nuclear ribonucleoprotein L-like	HNRPLL;HNRPLL;HNRPLL;HNRPLL;HNRPLL	S										1	0.00536966	42.106	0.308284	42.106	0	892.031	0.78952	_____________MSSSSSSPRETYEEDREY	_(ac)S(ph)SSSSSPRETYEEDREYESQAK_										Casein kinase I substrate motif;Casein kinase II substrate motif;G protein-coupled receptor kinase 1 substrate motif;GSK3 kinase substrate motif;MDC1 BRCT domain binding motif;Plk1 PBD domain binding motif
D6W592	4	D6W592	4	D6W592;Q8WVV9;B7WPG3;C9IYN3;Q5JB52	4;4;4;4;4	Heterogeneous nuclear ribonucleoprotein L-like	HNRPLL;HNRPLL;HNRPLL;HNRPLL;HNRPLL	S										1	0.00536966	42.106	0.308284	42.106	0	892.031	0.78952	____________MSSSSSSPRETYEEDREYE	_(ac)S(ph)SSSSSPRETYEEDREYESQAK_										Casein kinase I substrate motif;Casein kinase II substrate motif;G protein-coupled receptor kinase 1 substrate motif;MDC1 BRCT domain binding motif;Plk1 PBD domain binding motif
E5RG83	96	E5RG83	96	E5RG83;Q96NA8;B7ZLB0;E5RHW3;E5RI41	96;96;96;96;112	t-SNARE domain-containing protein 1	TSNARE1;TSNARE1;TSNARE1;TSNARE1;TSNARE1	S			0.451857		0.042084	0.246955				1	0.00868746	56.943	0.502104	56.943	2.62861	725.326	-0.21972	PGVAPEGSRMPEPTSSPTIGPRKDSAAGPHG	_MPEPTSS(ph)PTIGPR_	MAPK3_MAPK1_MAPK7_NLK_group	MAPK1;MAPK3	0.2333	0.0698	1.35125					Casein kinase II substrate motif;ERK1,2 kinase substrate motif;GSK-3, ERK1, ERK2, CDK5 substrate motif;MDC1 BRCT domain binding motif;Plk1 PBD domain binding motif;WW domain binding motif
E5RI98	6	E5RI98	6	E5RI98	6		NPM1	S			0.848398	0.826599		0.83754				1	0.000230685	76.768	0.992918	76.768	23.9837	951.968	0.37825	__________MNYEGSPIKVTLATLKMSVQP	_(ac)M(ox)NYEGS(ph)PIKVTLATLK_	CDK2_CDK3_CDK1_CDK5_group;EIF2AK2;NEK1_NEK5_NEK3_NEK4_NEK11_NEK2_group;ROCK_group	CDK1;CDK2;EIF2AK2;NEK2;ROCK2	0.0297	0.854	2					Cdc2 kinase substrate motif;CDK kinase substrate motif;CDK1,2,4,6 kinase substrate motif;ERK1,2 kinase substrate motif;GSK-3, ERK1, ERK2, CDK5 substrate motif;WW domain binding motif
E5RJR5	131	E5RJR5	131	E5RJR5;P63208;F8W8N3;E7ERH2	131;131;131;131	S-phase kinase-associated protein 1	SKP1;SKP1;SKP1;SKP1	T			0.185867	0.0136409	0.0672257	0.0677764	-0.0137274	-0.704183		0.00278686	0.00650409	76.522	1	65.305	65.3052	379.86	0.12234	LDVTCKTVANMIKGKTPEEIRKTFNIKNDFT	_GKT(ph)PEEIRK_	CDK2_CDK3_CDK1_CDK5_group;TTK	CDK1;CDK2;TTK	0.2678	0.4941	7.0633					AMP-activated protein kinase substrate motif;Calmodulin-dependent protein kinase II substrate motif;Casein kinase II substrate motif;Chk1 kinase substrate motif;Growth associated histone HI kinase substrate motif;GSK-3, ERK1, ERK2, CDK5 substrate motif;PKA kinase substrate motif;PKC kinase substrate motif;WW domain binding motif
E7ENU4	642	E7ENU4	642	E7ENU4;P55265;H0YCK3	642;599;594	Double-stranded RNA-specific adenosine deaminase	ADAR;ADAR;ADAR	S										1	0.0113196	47.204	0.352603	47.204	0.540907	641.951	0.58205	SSHYSTEKESEKTAESQTPTPSATSFFSGKS	_TAES(ph)QTPTPSATSFFSGK_	CK1_group	CSNK1A1	0.1285	0.2902	1.3564					ATM kinase substrate motif;b-Adrenergic Receptor kinase substrate motif;Casein kinase II substrate motif;DNA dependent Protein kinase substrate motif;G protein-coupled receptor kinase 1 substrate motif;PKA kinase substrate motif
E7ENU4	866	E7ENU4	866	E7ENU4;P55265	866;823	Double-stranded RNA-specific adenosine deaminase	ADAR;ADAR	S			0.0545011	0.169797	0.160791	0.1121				1	4.64e-23	169.21	0.812375	81.723	6.36495	833.915	1.3703	TPVTGASLRRTMLLLSRSPEAQPKTLPLTGS	_TM(ox)LLLS(ph)RSPEAQPK_	ATM_ATR_group	ATM	0.3381	0.2828	1.0328					Casein kinase II substrate motif
E7ENU4	868	E7ENU4	868	E7ENU4;P55265	868;825	Double-stranded RNA-specific adenosine deaminase	ADAR;ADAR	S			0.104873	0.152508	0.0909888	0.11703				1	2.07e-183	271.64	0.998336	271.64	27.7809	825.918	-1.3536	VTGASLRRTMLLLSRSPEAQPKTLPLTGSTF	_TMLLLSRS(ph)PEAQPK_	EIF2AK2	EIF2AK2	0.0285	0.549	1.9186					Casein kinase II substrate motif;ERK1,2 kinase substrate motif;Growth associated histone HI kinase substrate motif;GSK-3, ERK1, ERK2, CDK5 substrate motif;WW domain binding motif
E7ENU4	644	E7ENU4	644	E7ENU4;P55265;H0YCK3	644;601;596	Double-stranded RNA-specific adenosine deaminase	ADAR;ADAR;ADAR	T			0.0920721	0.27739	0.257493	0.257493				1	6.82e-27	153.36	0.99974	153.36	37.9642	962.422	-1.3342	HYSTEKESEKTAESQTPTPSATSFFSGKSPV	_TAESQT(ph)PTPSATSFFSGK_	MAPK3_MAPK1_MAPK7_NLK_group	MAPK1;MAPK3	0.2569	0.18415	1.64475					Casein kinase I substrate motif;G protein-coupled receptor kinase 1 substrate motif;GSK-3, ERK1, ERK2, CDK5 substrate motif;WW domain binding motif
E7ENU4	646	E7ENU4	646	E7ENU4;P55265;H0YCK3	646;603;598	Double-stranded RNA-specific adenosine deaminase	ADAR;ADAR;ADAR	T										1	0.00508144	58.712	0.468781	58.712	2.59112	641.951	-0.04251	STEKESEKTAESQTPTPSATSFFSGKSPVTT	_TAESQTPT(ph)PSATSFFSGK_	MAPK3_MAPK1_MAPK7_NLK_group	MAPK1;MAPK3	0.2398	0.18415	1.38065					DNA dependent Protein kinase substrate motif;G protein-coupled receptor kinase 1 substrate motif;GSK-3, ERK1, ERK2, CDK5 substrate motif;MAPKAPK2 kinase substrate motif;WW domain binding motif
E7EPH8	281	E7EPH8	281	E7EPH8;J3KNL5;Q3KR37;E9PRD6	281;274;274;270	GRAM domain-containing protein 1B	GRAMD1B;GRAMD1B;GRAMD1B	S										1	0.00450146	53.037	0.956733	53.037	15.606	839.408	3.248	NDSSSKSSIETKPDASPQLPKKSITNSTLTS	_SSIETKPDAS(ph)PQLPK_										ERK1,2 kinase substrate motif;G protein-coupled receptor kinase 1 substrate motif;GSK-3, ERK1, ERK2, CDK5 substrate motif;PKA kinase substrate motif;WW domain binding motif
E7EPH8	557	E7EPH8	557	E7EPH8;J3KNL5;Q3KR37	557;550;550	GRAM domain-containing protein 1B	GRAMD1B;GRAMD1B	S			-0.239447			-0.239447				1	9.74e-08	126.25	1	126.25	82.4578	619.945	-0.26364	LAKTESTYLAEMHRQSPKEKASKTTTVRRRK	_TESTYLAEMHRQS(ph)PK_										Casein kinase II substrate motif;ERK1,2 kinase substrate motif;Growth associated histone HI kinase substrate motif;GSK-3, ERK1, ERK2, CDK5 substrate motif;PKA kinase substrate motif;PKC kinase substrate motif;WW domain binding motif
E7EPH8	594	E7EPH8	594	E7EPH8;J3KNL5;Q3KR37	594;587;587	GRAM domain-containing protein 1B	GRAMD1B;GRAMD1B	T			0.0795658			0.0795659				1	0.00667699	43.623	0.608267	43.623	2.0142	842.384	-1.0778	RVPHLEEVMSPVTTPTDEDVGHRIKHVAGST	_VPHLEEVMSPVTTPT(ph)DEDVGHR_										Casein kinase II substrate motif;DNA dependent Protein kinase substrate motif
E7EPP6	296	E7EPP6	296	E7EPP6;O14757;J3KN87	296;280;280	Serine/threonine-protein kinase Chk1	CHEK1;CHEK1	S			-0.0515486	-0.324383	0.00748262	-0.0515487				1	1.98e-05	108.96	0.999348	104.03	32.2841	753.33	1.666	YNKPLKKGAKRPRVTSGGVSESPSGFSKHIQ	_VTS(ph)GGVSESPSGFSK_	CaMKII_group;CDK4_CDK6_group;DNAPK;IKKalpha_IKKbeta_group;NEK1_NEK5_NEK3_NEK4_NEK11_NEK2_group;PAK_group;PKB_group	AKT1;CAMK2A;CDK4;CHUK;HYRC;NEK2;PAK1	0.1101	0.552	1.9752					14-3-3 domain binding motif;Akt kinase substrate motif;Calmodulin-dependent protein kinase II substrate motif;G protein-coupled receptor kinase 1 substrate motif;GSK3 kinase substrate motif;MAPKAPK1 kinase substrate motif;PKA kinase substrate motif;PKC kinase substrate motif
E7EQD2	266	E7EQD2	266	E7EQD2;Q8NBI5;E9PS74;H0YD64	266;253;253;24	Solute carrier family 43 member 3	SLC43A3;SLC43A3;SLC43A3;SLC43A3	S				-0.175061		-0.175061				1	2.94e-05	102.58	0.999977	102.58	46.3628	836.385	-0.82409	TAEHENRELQSKEFLSAKEETPGAGQKQELR	_EFLS(ph)AKEETPGAGQK_	PKC_group	PRKCA;PRKCB;PRKCZ	0.2489	0.0919	1.2322					Casein kinase I substrate motif;Casein kinase II substrate motif;PKA kinase substrate motif;PKC kinase substrate motif
E7EQD2	261	E7EQD2	261	E7EQD2;Q8NBI5;E9PS74;H0YD64	261;248;248;19	Solute carrier family 43 member 3	SLC43A3;SLC43A3;SLC43A3;SLC43A3	S			0.158208	-0.0913101	1.08672	0.158208				1	7.48e-22	191.06	1	191.06	105.787	680.331	-0.090009	KEEKETAEHENRELQSKEFLSAKEETPGAGQ	_ELQS(ph)KEFLSAK_										Casein kinase I substrate motif;Casein kinase II substrate motif
E7EQL5	81	E7EQL5	81	E7EQL5;E7EV09;E7EQU2;E7ETL8;E9PGG1	81;81;81;81;81		DYNC1I2;DYNC1I2;DYNC1I2;DYNC1I2;DYNC1I2	S			0.145612	0.107554	-0.176593	0.124328				1	1.9e-06	92.865	0.679538	92.865	5.71013	958.462	-0.14176	SMGLTPESPIVPPPMSPSSKSVSTPSEAGSQ	_EAEALLQSMGLTPESPIVPPPMS(ph)PSSK_	CDK2_CDK3_CDK1_CDK5_group;MAPK3_MAPK1_MAPK7_NLK_group;NEK1_NEK5_NEK3_NEK4_NEK11_NEK2_group	CDK1;CDK2;CDK5;MAPK1;MAPK3;NEK2	0.30895	0.391	1.84365					Casein kinase I substrate motif;Casein kinase II substrate motif;ERK1,2 kinase substrate motif;GSK-3, ERK1, ERK2, CDK5 substrate motif;WW domain binding motif
E7EQL5	83	E7EQL5	83	E7EQL5;E7EV09;E7EQU2;E7ETL8;E9PGG1	83;83;83;83;83		DYNC1I2;DYNC1I2;DYNC1I2;DYNC1I2;DYNC1I2	S										1	8.65e-05	72.103	0.347677	67.809	0	963.794	-0.0030193	GLTPESPIVPPPMSPSSKSVSTPSEAGSQDS	_EAEALLQSM(ox)GLTPESPIVPPPMSPS(ph)SK_	NEK1_NEK5_NEK3_NEK4_NEK11_NEK2_group;PKC_group	NEK2;PRKCA;PRKCB;PRKCZ	0.2894	0.3643	1.976					Casein kinase I substrate motif;Casein kinase II substrate motif;DNA dependent Protein kinase substrate motif;PKA kinase substrate motif;PKC kinase substrate motif
E7EQL5	84	E7EQL5	84	E7EQL5;E7EV09;E7EQU2;E7ETL8;E9PGG1	84;84;84;84;84		DYNC1I2;DYNC1I2;DYNC1I2;DYNC1I2;DYNC1I2	S										1	8.65e-05	72.103	0.347677	67.809	0	963.794	-0.0030193	LTPESPIVPPPMSPSSKSVSTPSEAGSQDSG	_EAEALLQSM(ox)GLTPESPIVPPPMSPS(ph)SK_	CK1_group;NEK1_NEK5_NEK3_NEK4_NEK11_NEK2_group;PAK_group	CSNK1D;CSNK1E;NEK2;PAK1	0.0664	0.899	2.80075					Casein kinase II substrate motif;G protein-coupled receptor kinase 1 substrate motif;GSK3 kinase substrate motif;MDC1 BRCT domain binding motif;Plk1 PBD domain binding motif
E7EQL5	95	E7EQL5	95	E7EQL5;E7EV09;E7EQU2;E7ETL8;E9PGG1;F8W8S0;Q13409;B7ZA04;E7EMU4;E7ESD3;E7ET01;E7ERH4;E7ERR6;E7EUM4	95;95;95;95;95;101;101;113;113;113;113;113;101;113	Cytoplasmic dynein 1 intermediate chain 2	DYNC1I2;DYNC1I2;DYNC1I2;DYNC1I2;DYNC1I2;DYNC1I2;DYNC1I2;DYNC1I2;DYNC1I2;DYNC1I2;DYNC1I2;DYNC1I2;DYNC1I2;DYNC1I2	S			-0.016979			-0.0169791				1	0.00123553	59.429	0.956089	59.429	16.6224	1015.92	1.4874	MSPSSKSVSTPSEAGSQDSGDGAVGSRRGPI	_SVSTPSEAGS(ph)QDSGDGAVGSR_	ATM_ATR_group;CK1_group;NEK1_NEK5_NEK3_NEK4_NEK11_NEK2_group	ATM;CSNK1A1;CSNK1D;CSNK1E;NEK2	0.1334	0.899	2.7488					ATM kinase substrate motif;Casein kinase I substrate motif;Casein kinase II substrate motif;DNA dependent Protein kinase substrate motif;MAPKAPK2 kinase substrate motif
E7EQP8	351	E7EQP8	351	E7EQP8;F8W9Q9;Q96PV6	351;314;314	Leukocyte receptor cluster member 8	LENG8;LENG8;LENG8	S			0.10165	0.143002	0.065848	0.088413				1	4.73e-54	224.97	1	224.97	120.587	900.451	0.32136	SREPLPGLTREPVAESPKKKRWEAASSLHPP	_EPLPGLTREPVAES(ph)PK_	PKC_group;RSK_group	PRKCA;PRKCB;RPS6KA1	0.2156	0.1434	2.0975					b-Adrenergic Receptor kinase substrate motif;Cdc2 kinase substrate motif;CDK kinase substrate motif;CDK1,2,4,6 kinase substrate motif;ERK1,2 kinase substrate motif;Growth associated histone HI kinase substrate motif;GSK-3, ERK1, ERK2, CDK5 substrate motif;PKA kinase substrate motif;PKC kinase substrate motif;WW domain binding motif
E7EQS0	6	E7EQS0	6	E7EQS0;C9K0R9;C9J029;F8WDE9	6;6;6;6	Inosine-5'-monophosphate dehydrogenase	IMPDH1;IMPDH1;IMPDH1;IMPDH1	T			0.0817487			0.0817486				1	0.000472163	59.971	1	59.971	59.971	798.05	0.058867	__________MEGPLTPPPLQGGGAAAVPEP	_(ac)MEGPLT(ph)PPPLQGGGAAAVPEPGAR_	MAPK3_MAPK1_MAPK7_NLK_group	MAPK1;MAPK3	0.3273	0.2845	1.8269					ERK1,2 kinase substrate motif;GSK3, Erk1, Erk2 and CDK5 kinase motif;GSK-3, ERK1, ERK2, CDK5 substrate motif;RAF1 kinase substrate motif;WW domain binding motif
E7EQS8	1128	E7EQS8	1128	E7EQS8;Q6N021;E7EPB1	1128;1107;1107	Methylcytosine dioxygenase TET2	TET2;TET2;TET2	S			0.288536			0.288536				1	1.24e-37	146.68	0.757324	146.68	4.94255	829.395	-1.2313	PTKRTAASVLNNFIESPSKLLDTPIKNLLDT	_TAASVLNNFIES(ph)PSK_	MAPK3_MAPK1_MAPK7_NLK_group	MAPK3	0.1571	0.3322	1.4296					b-Adrenergic Receptor kinase substrate motif;Casein kinase II substrate motif;Cdc2 kinase substrate motif;CDK kinase substrate motif;CDK1,2,4,6 kinase substrate motif;ERK1,2 kinase substrate motif;GSK-3, ERK1, ERK2, CDK5 substrate motif;WW domain binding motif
E7EQS8	1130	E7EQS8	1130	E7EQS8;Q6N021;E7EPB1	1130;1109;1109	Methylcytosine dioxygenase TET2	TET2;TET2;TET2	S			0.308011	0.217975		0.308011				1	5.06e-10	119.62	0.617757	61.942	2.08496	829.395	1.6483	KRTAASVLNNFIESPSKLLDTPIKNLLDTPV	_TAASVLNNFIESPS(ph)K_										Casein kinase I substrate motif;DNA dependent Protein kinase substrate motif
E7EQS8	120	E7EQS8	120	E7EQS8;Q6N021;E7EPB1;D6RE87	120;99;99;99	Methylcytosine dioxygenase TET2	TET2;TET2;TET2;TET2	S			0.0363276	-0.00830491	-0.0799049	0.0126402				1	0.000964029	76.378	0.994693	76.378	24.8824	776.405	0.66609	GYSKCLQNGGIKRTVSEPSLSGLLQIKKLKQ	_TVS(ph)EPSLSGLLQIK_	CaMKII_group;PAK_group;PKA_group	CAMK2A;PAK1;PRKACA	0.1437	0.1639	1.2941					14-3-3 domain binding motif;AMP-activated protein kinase substrate motif;Calmodulin-dependent protein kinase I substrate motif;Calmodulin-dependent protein kinase II substrate motif;Calmodulin-dependent protein kinase IV substrate motif;Casein kinase I substrate motif;Casein kinase II substrate motif;Chk1 kinase substrate motif;G protein-coupled receptor kinase 1 substrate motif;PKA kinase substr…
E7EQS8	96	E7EQS8	96	E7EQS8;Q6N021;E7EPB1;D6RE87	96;75;75;75	Methylcytosine dioxygenase TET2	TET2;TET2;TET2;TET2	S			0.0600474	0.298306	0.406537	0.298306				1	0.00132268	81.239	0.999998	81.239	58.0604	623.261	0.62351	YYGIPCMKGSQNSRVSPDFTQESRGYSKCLQ	_VS(ph)PDFTQESR_										Casein kinase I substrate motif;ERK1,2 kinase substrate motif;G protein-coupled receptor kinase 1 substrate motif;GSK-3, ERK1, ERK2, CDK5 substrate motif;PKA kinase substrate motif;PKC kinase substrate motif;WW domain binding motif
E7EQZ4	4	E7EQZ4	4	E7EQZ4;Q16637;B4DP61	4;4;4	Survival motor neuron protein	SMN1;SMN1;SMN1	S			0.204141		0.153157	0.175045				1	1.51e-16	153.1	0.858808	153.1	7.84086	1102.96	-0.79171	____________MAMSSGGSGGGVPEQEDSV	_(ac)AM(ox)S(ph)SGGSGGGVPEQEDSVLFR_										G protein-coupled receptor kinase 1 substrate motif;GSK3 kinase substrate motif
E7EQZ4	5	E7EQZ4	5	E7EQZ4;Q16637;B4DP61	5;5;5	Survival motor neuron protein	SMN1;SMN1;SMN1	S			0.144438		1.38571	0.144438				1	4.4e-06	103.29	0.666662	57.482	0	748.296	-4.9691	___________MAMSSGGSGGGVPEQEDSVL	_AM(ox)S(ph)S(ph)GGSGGGVPEQEDSVLFR_	CaMKII_group	CAMK2A	0.1462	0.2111	1.9017					Casein kinase I substrate motif;Casein kinase II substrate motif;MDC1 BRCT domain binding motif;Plk1 PBD domain binding motif
E7EQZ4	8	E7EQZ4	8	E7EQZ4;Q16637;B4DP61	8;8;8	Survival motor neuron protein	SMN1;SMN1;SMN1	S					1.38571	1.38571				1	0.00253689	57.482	0.666662	57.482	0	748.296	-4.9691	________MAMSSGGSGGGVPEQEDSVLFRR	_AM(ox)S(ph)S(ph)GGSGGGVPEQEDSVLFR_	CK1_group	CSNK1A1	0.1392	0.2291	1.3564					MAPKAPK2 kinase substrate motif
E7EQZ4	28	E7EQZ4	28	E7EQZ4;Q16637;B4DP61	28;28;28	Survival motor neuron protein	SMN1;SMN1;SMN1	S			-0.0916789	-0.0375768	0.063641	-0.075596				1	3.84e-54	215.65	0.999996	215.65	57.1315	1008.93	-0.28724	PEQEDSVLFRRGTGQSDDSDIWDDTALIKAY	_GTGQS(ph)DDSDIWDDTALIK_										Casein kinase I substrate motif;Casein kinase II substrate motif
E7EQZ4	31	E7EQZ4	31	E7EQZ4;Q16637;B4DP61	31;31;31	Survival motor neuron protein	SMN1;SMN1;SMN1	S			-0.0143976	0.066537	-0.450144	-0.00682564				1	1.09e-22	166.89	1	166.89	78.6652	1048.91	-0.34975	EDSVLFRRGTGQSDDSDIWDDTALIKAYDKA	_GTGQS(ph)DDS(ph)DIWDDTALIK_	CK1_group	CSNK1A1	0.1158	0.2291	1.3372					b-Adrenergic Receptor kinase substrate motif
E7EQZ4	25	E7EQZ4	25	E7EQZ4;Q16637;B4DP61	25;25;25	Survival motor neuron protein	SMN1;SMN1;SMN1	T			-0.0973784	0.168385	-0.495064	-0.495064				1	0.000521157	81.922	0.68059	47.745	0.365636	1048.91	-0.3693	GGVPEQEDSVLFRRGTGQSDDSDIWDDTALI	_GT(ph)GQSDDS(ph)DIWDDTALIK_	CaMKII_group;PAK_group	CAMK2A;PAK1	0.14475	0.1776	1.4011					Calmodulin-dependent protein kinase II substrate motif;Calmodulin-dependent protein kinase IV substrate motif;Casein kinase I substrate motif;Casein kinase II substrate motif;Chk1 kinase substrate motif;PAK2 kinase substrate motif;PKA kinase substrate motif;PKC kinase substrate motif
E7ERF4	9	E7ERF4	9	E7ERF4;P30566	9;9	Adenylosuccinate lyase	ADSL;ADSL	S			-0.00232458	-0.0970697	0.124593	-0.00232461	0.201383	0.170822		0.0195953	2.04e-46	220.87	0.999965	147.87	44.8405	674.96	-0.023395	_______MAAGGDHGSPDSYRSPLASRYASP	_(ac)AAGGDHGS(ph)PDSYRSPLASR_										Casein kinase I substrate motif;Casein kinase II substrate motif;ERK1,2 kinase substrate motif;GSK-3, ERK1, ERK2, CDK5 substrate motif;WW domain binding motif
E7ERK9	107	E7ERK9	107	E7ERK9;Q9UI10;F8W8L6	107;86;86	Translation initiation factor eIF-2B subunit delta	EIF2B4;EIF2B4;EIF2B4	T			1.90246		1.18536	1.54394				1	1.48e-06	113.29	1	113.29	69.4967	739.35	0.28379	VGPTRELPESGIQLGTPREKVPAGRSKAELR	_ELPESGIQ(de)LGT(ph)PR_	GSK3_group	GSK3B	0.0569	0.5203	2.085					Casein kinase II substrate motif;Growth associated histone HI kinase substrate motif;GSK-3, ERK1, ERK2, CDK5 substrate motif;PKA kinase substrate motif;PKC kinase substrate motif;WW domain binding motif
E7ERS3	46	E7ERS3	46	E7ERS3;Q86VM9;H3BPD0	46;46;46	Zinc finger CCCH domain-containing protein 18	ZC3H18;ZC3H18;ZC3H18	S			0.14952			0.14952				1	4.7e-06	84.073	0.986907	84.073	18.7724	915.709	-1.0192	DSGSDQDLDGAGVRASDLEDEESAARGPSQE	_DSGSDQDLDGAGVRAS(ph)DLEDEESAAR_	PAK_group;PKA_group	PAK1;PRKACA	0.1858	0.06215	1.2907					Casein kinase II substrate motif;PKA kinase substrate motif;PKC kinase substrate motif
E7ERS3	67	E7ERS3	67	E7ERS3;Q86VM9;H3BPD0	67;67;67	Zinc finger CCCH domain-containing protein 18	ZC3H18;ZC3H18;ZC3H18	S				0.245252	0.571143	0.408168				1	0.000565567	59.429	0.979414	59.429	16.9744	822.317	0.11974	ESAARGPSQEEEDNHSDEEDRASEPKSQDQD	_GPSQEEEDNHS(ph)DEEDRASEPK_	CK1_group	CSNK1A1	0.1297	0.0668	1.3564					BARD1 BRCT domain binding motif;Casein kinase I substrate motif;Casein kinase II substrate motif
E7ERS3	556	E7ERS3	556	E7ERS3;Q86VM9;H3BP01	556;532;197	Zinc finger CCCH domain-containing protein 18	ZC3H18;ZC3H18;ZC3H18	S			-0.175974	-0.290939	-0.113458	-0.199024				1	1.82e-14	131.32	1	131.32	68.7941	531.225	-0.8819	DPWRRSKSPKKKLGVSVSPSRARRRRKTSAS	_LGVS(ph)VS(ph)PSR_	PKC_group	PRKCB	0.1183	0.1107	1.1009					Casein kinase II substrate motif;G protein-coupled receptor kinase 1 substrate motif;GSK3 kinase substrate motif;PKA kinase substrate motif
E7ERS3	558	E7ERS3	558	E7ERS3;Q86VM9;H3BP01	558;534;199	Zinc finger CCCH domain-containing protein 18	ZC3H18;ZC3H18;ZC3H18	S			0.013498	0.00158601	0.0469799	0.00489684				1	1.84e-20	159.99	0.998563	131.32	28.4187	531.225	-0.8819	WRRSKSPKKKLGVSVSPSRARRRRKTSASSA	_LGVS(ph)VS(ph)PSR_										Casein kinase II substrate motif;Cdc2 kinase substrate motif;CDK kinase substrate motif;CDK1,2,4,6 kinase substrate motif;ERK1,2 kinase substrate motif;G protein-coupled receptor kinase 1 substrate motif;GSK-3, ERK1, ERK2, CDK5 substrate motif;WW domain binding motif
E7ERS3	892	E7ERS3	892	E7ERS3;Q86VM9;H3BRH3	892;868;111	Zinc finger CCCH domain-containing protein 18	ZC3H18;ZC3H18;ZC3H18	S			-0.143325	-0.160089	-0.0750792	-0.120137				1	0.0111705	59.542	1	57.532	57.5318	482.237	-0.84392	PDRGSRDRKSGGRLGSPKPERQRGQNSKAPA	_LGS(ph)PKPER_	MAPK3_MAPK1_MAPK7_NLK_group	MAPK3	0.1618	0.1087	1.409					14-3-3 domain binding motif;Calmodulin-dependent protein kinase II substrate motif;ERK1,2 kinase substrate motif;Growth associated histone HI kinase substrate motif;GSK-3, ERK1, ERK2, CDK5 substrate motif;PKA kinase substrate motif;PKC kinase substrate motif;WW domain binding motif
E7ERS3	6	E7ERS3	6	E7ERS3;Q86VM9;H3BPD0	6;6;6	Zinc finger CCCH domain-containing protein 18	ZC3H18;ZC3H18;ZC3H18	S			-0.382382	-0.46178		-0.422076				1	5.03e-06	76.274	0.999355	76.274	31.9053	1176.83	-2.535	__________MDVAESPERDPHSPEDEEQPQ	_(ac)MDVAES(ph)PERDPHSPEDEEQPQGLSDDDILR_										b-Adrenergic Receptor kinase substrate motif;Casein kinase II substrate motif;Cdc2 kinase substrate motif;CDK kinase substrate motif;CDK1,2,4,6 kinase substrate motif;ERK1,2 kinase substrate motif;GSK-3, ERK1, ERK2, CDK5 substrate motif;WW domain binding motif
E7ERS3	866	E7ERS3	866	E7ERS3;Q86VM9;H3BRH3	866;842;85	Zinc finger CCCH domain-containing protein 18	ZC3H18;ZC3H18;ZC3H18	S			0.111031	0.127765	-0.242157	0.111031				1	0.000270299	82.865	0.997744	82.865	26.4584	598.94	-0.39751	KGSRKRYEPSDKDRQSPPPAKRPNTSPDRGS	_YEPSDKDRQS(ph)PPPAK_	MAPK3_MAPK1_MAPK7_NLK_group	MAPK3	0.2197	0.1087	1.5933					Casein kinase I substrate motif;ERK1,2 kinase substrate motif;G protein-coupled receptor kinase 1 substrate motif;GSK-3, ERK1, ERK2, CDK5 substrate motif;PKA kinase substrate motif;PKC kinase substrate motif;WW domain binding motif
E7ESJ3	647	E7ESJ3	647	E7ESJ3;Q9UPS8	647;630	Ankyrin repeat domain-containing protein 26	ANKRD26;ANKRD26	S			0.428035	0.131589	-0.449415	0.131589				1	0.00374182	68.676	0.999988	68.676	49.2813	572.258	0.72545	KSTEKEKRTSKESVNSPVFGKASLLTGGLLQ	_ESVNS(ph)PVFGK_	CK1_group	CSNK1A1	0.115	0.128	1.3273					ERK1,2 kinase substrate motif;GSK-3, ERK1, ERK2, CDK5 substrate motif;WW domain binding motif
E7ESS2	776	E7ESS2	776	E7ESS2;E7EN19;G5E948;O95819;H7C360;G3XAA2;E7ENQ1;H7C0P6;C9J840;E7EX83	776;769;881;800;731;719;715;617;603;599	Mitogen-activated protein kinase kinase kinase kinase 4	MAP4K4;MAP4K4;MAP4K4;MAP4K4;MAP4K4;MAP4K4;MAP4K4;MAP4K4;MAP4K4;MAP4K4	S										1	0.0022814	62.002	0.499998	62.002	0	844.375	-1.9887	GADESTSGPEDTRAASSLNLSNGETESVKTM	_AAS(ph)SLNLSN(de)GETESVK_	CaMKII_group;CK1_group;HIPK1_HIPK2_group;PAK_group;TTK	CAMK2A;CSNK1A1;HIPK2;PAK1;TTK	0.126	0.3595	1.7701					14-3-3 domain binding motif;Calmodulin-dependent protein kinase II substrate motif;MAPKAPK2 kinase substrate motif;PKA kinase substrate motif;PKC kinase substrate motif
E7ESS2	777	E7ESS2	777	E7ESS2;E7EN19;G5E948;O95819;H7C360;G3XAA2;E7ENQ1;H7C0P6;C9J840;E7EX83	777;770;882;801;732;720;716;618;604;600	Mitogen-activated protein kinase kinase kinase kinase 4	MAP4K4;MAP4K4;MAP4K4;MAP4K4;MAP4K4;MAP4K4;MAP4K4;MAP4K4;MAP4K4;MAP4K4	S										1	0.0022814	62.002	0.499998	62.002	0	844.375	-1.9887	ADESTSGPEDTRAASSLNLSNGETESVKTMI	_AAS(ph)SLNLSN(de)GETESVK_	CK1_group;HIPK1_HIPK2_group;PAK_group;PKC_group;TTK	CSNK1A1;HIPK2;PAK1;PRKCE;TTK	0.0784	0.4052	1.2248					G protein-coupled receptor kinase 1 substrate motif;GSK3 kinase substrate motif;MDC1 BRCT domain binding motif;Plk1 PBD domain binding motif
E7ESS2	781	E7ESS2	781	E7ESS2;E7EN19;G5E948;O95819;H7C360;G3XAA2;E7ENQ1;H7C0P6;C9J840;E7EX83	781;774;886;805;736;724;720;622;608;604	Mitogen-activated protein kinase kinase kinase kinase 4	MAP4K4;MAP4K4;MAP4K4;MAP4K4;MAP4K4;MAP4K4;MAP4K4;MAP4K4;MAP4K4;MAP4K4	S			0.286881	0.582267	0.298893	0.298893				1	1.92e-05	111.93	0.997013	111.93	25.7474	843.883	1.2207	TSGPEDTRAASSLNLSNGETESVKTMIVHDD	_AASSLNLS(ph)NGETESVK_										Casein kinase II substrate motif;G protein-coupled receptor kinase 1 substrate motif;MAPKAPK2 kinase substrate motif
E7ESS2	611	E7ESS2	611	E7ESS2;E7EN19;G5E948;O95819;H7C360;G3XAA2;E7ENQ1;H7C0P6;C9J840;E7EX83	611;608;716;639;570;554;554;456;438;438	Mitogen-activated protein kinase kinase kinase kinase 4	MAP4K4;MAP4K4;MAP4K4;MAP4K4;MAP4K4;MAP4K4;MAP4K4;MAP4K4;MAP4K4;MAP4K4	S				0.453755	0.655993	0.554834				1	0.000113457	76.713	0.988101	76.713	19.1937	665.299	-0.32555	PVRTTSRSPVLSRRDSPLQGSGQQNSQAGQR	_RDS(ph)PLQGSGQQNSQAGQR_	HIPK1_HIPK2_group;PAK_group;PKA_group	HIPK2;PAK1;PRKACA	0.165	0.4052	1.7794					14-3-3 domain binding motif;b-Adrenergic Receptor kinase substrate motif;Calmodulin-dependent protein kinase II substrate motif;Calmodulin-dependent protein kinase IV substrate motif;Chk1 kinase substrate motif;ERK1,2 kinase substrate motif;GSK-3, ERK1, ERK2, CDK5 substrate motif;MAPKAPK2 kinase substrate motif;PAK2 kinase substrate motif;PKA kinase substrate motif;PKC epsilon kinase substrate mo…
E7ESS2	601	E7ESS2	601	E7ESS2;E7EN19;G5E948;O95819;H7C360;G3XAA2;E7ENQ1;H7C0P6;C9J840;E7EX83;H7C3Z6	601;598;706;629;560;544;544;446;428;428;241	Mitogen-activated protein kinase kinase kinase kinase 4	MAP4K4;MAP4K4;MAP4K4;MAP4K4;MAP4K4;MAP4K4;MAP4K4;MAP4K4;MAP4K4;MAP4K4;MAP4K4	S			-0.0611647	0.107822	-0.034574	-0.0320789				1	0.000754303	81.311	0.997168	81.311	28.4874	632.278	0.054796	SDSDEVPPRVPVRTTSRSPVLSRRDSPLQGS	_TTS(ph)RS(ph)PVLSR_	PAK_group	PAK1	0.1863	0.4479	1.8636					14-3-3 domain binding motif;AMP-activated protein kinase substrate motif;Calmodulin-dependent protein kinase II substrate motif;Casein kinase II substrate motif;HMGCoA Reductase kinase substrate motif;PKA kinase substrate motif;PKC kinase substrate motif
E7ESS2	603	E7ESS2	603	E7ESS2;E7EN19;G5E948;O95819;H7C360;G3XAA2;E7ENQ1;H7C0P6;C9J840;E7EX83;H7C3Z6	603;600;708;631;562;546;546;448;430;430;243	Mitogen-activated protein kinase kinase kinase kinase 4	MAP4K4;MAP4K4;MAP4K4;MAP4K4;MAP4K4;MAP4K4;MAP4K4;MAP4K4;MAP4K4;MAP4K4;MAP4K4	S			-0.00138564	-0.0315774	0.0821575	0.0142124				1	3.15e-26	209.25	0.999705	81.311	35.4469	632.278	0.054796	SDEVPPRVPVRTTSRSPVLSRRDSPLQGSGQ	_TTS(ph)RS(ph)PVLSR_	CDK2_CDK3_CDK1_CDK5_group;CK1_group	CDK1;CSNK1A1	0.17435	0.3694	1.145					Casein kinase I substrate motif;ERK1,2 kinase substrate motif;G protein-coupled receptor kinase 1 substrate motif;Growth associated histone HI kinase substrate motif;GSK3 kinase substrate motif;GSK-3, ERK1, ERK2, CDK5 substrate motif;WW domain binding motif
E7ESS2	886	E7ESS2	886	E7ESS2;E7EN19	886;879		MAP4K4;MAP4K4	T			0.0900404	0.311387	0.265917	0.265917				1	1.73e-07	119.97	0.748661	109.13	5.13947	829.885	-0.52576	PQDKLTANETQSASSTLQKHKSSSSFTPFID	_LTANETQSASST(ph)LQK_	MSN_group;PKC_group;TTK	MAP4K4;PRKCA;PRKCB;PRKCE;TNIK;TTK	0.1664	0.40245	2.11105					MAPKAPK2 kinase substrate motif;MDC1 BRCT domain binding motif;Plk1 PBD domain binding motif
E7ETA6	1722	E7ETA6;E7EV56;Q15154	1722;1676;1730	E7ETA6;H0YBA1;A6NNN6;E7EV56;Q15154	1722;470;429;1676;1730	Pericentriolar material 1 protein	PCM1;PCM1;PCM1;PCM1;PCM1	S			-0.249376	-0.253309	-0.148977	-0.212835				1	9.5e-73	234.34	1	232.2	164.846	742.076	0.13093	QSCAKEAKRILEDHGSPAGEIDDEDKDKDET	_ILEDHGS(ph)PAGEIDDEDKDKDETETVK_	CDK2_CDK3_CDK1_CDK5_group;CK1_group;GSK3_group	CDK1;CSNK1A1;CSNK1D;GSK3B	0.1165	0.4325	1.56635					Casein kinase I substrate motif;ERK1,2 kinase substrate motif;GSK-3, ERK1, ERK2, CDK5 substrate motif;WW domain binding motif
E7ETA6	110	E7ETA6;E7EV56;Q15154	110;110;110	E7ETA6;E7EV56;E7EV93;E9PGW9;E5RGQ4;Q15154	110;110;110;110;110;110	Pericentriolar material 1 protein	PCM1;PCM1;PCM1;PCM1;PCM1;PCM1	S			0.394404	0.310107	0.265557	0.320427				1	3.41e-07	147.58	1	147.58	147.577	594.258	-1.049	PEQAELEKLKQRINFSDLDQRSIGSDSQGRA	_INFS(ph)DLDQR_										Casein kinase II substrate motif;Pyruvate dehydrogenase kinase substrate motif
E7ETA6	1283	E7ETA6;E7EV56;Q15154	1283;1284;1283	E7ETA6;H0YBA1;E7EV56;Q15154	1283;4;1284;1283	Pericentriolar material 1 protein	PCM1;PCM1;PCM1;PCM1	S					0.356595	0.356595				1	0.00506826	73.386	0.995775	73.386	24.0532	571.776	0.36391	VDPTTVTKTFKTRKASAQASLASKDKTPKSK	_KAS(ph)AQ(de)ASLASK_	CaMKII_group;CK1_group;GSK3_group;PAK_group	CAMK2A;CSNK1D;GSK3B;PAK1	0.0943	0.363	1.68045					14-3-3 domain binding motif;Calmodulin-dependent protein kinase II substrate motif;Casein kinase I substrate motif;G protein-coupled receptor kinase 1 substrate motif;GSK3 kinase substrate motif;MAPKAPK1 kinase substrate motif;PKA kinase substrate motif;PKC epsilon kinase substrate motif;PKC kinase substrate motif
E7ETA6	384	E7ETA6;E7EV56;Q15154	384;384;384	E7ETA6;E7EV56;E7EV93;E9PGW9;E5RGQ4;Q15154	384;384;423;423;384;384	Pericentriolar material 1 protein	PCM1;PCM1;PCM1;PCM1;PCM1;PCM1	S			0.480575	0.0901759	0.324235	0.243547				1	0.000202094	83.692	0.919938	82.925	10.6033	479.564	-0.52515	ESLSLTREVSQSRKPSASERLPDEKVELFSK	_KPS(ph)ASERLPDEK_	CaMKII_group;CK1_group;PAK_group;PKA_group	CAMK2A;CSNK1D;PAK1;PRKACA	0.09825	0.266	1.2532					14-3-3 domain binding motif;Calmodulin-dependent protein kinase II substrate motif;Casein kinase II substrate motif;DNA dependent Protein kinase substrate motif;MAPKAPK2 kinase substrate motif;PKA kinase substrate motif;PKC epsilon kinase substrate motif;PKC kinase substrate motif
E7ETA6	960	E7ETA6;E7EV56;Q15154	960;961;960	E7ETA6;E7EV56;Q15154	960;961;960	Pericentriolar material 1 protein	PCM1;PCM1;PCM1	S				0.199248		0.199248				1	5.53e-05	100.39	1	100.39	71.8133	659.284	0.2787	NGKETKNRWKNNCPFSADENYRPLAKTRQQN	_NNCPFS(ph)ADENYRPLAK_										Casein kinase II substrate motif
E7ETA6	1335	E7ETA6;Q15154	1335;1335	E7ETA6;H0YBA1;A6NNN6;Q15154	1335;56;15;1335	Pericentriolar material 1 protein	PCM1;PCM1;PCM1;PCM1	S			-0.0842267	-0.530698	-0.115582	-0.115582				1	0.00135947	66.826	0.998428	66.826	28.0275	558.925	0.33104	SMSSTCEPCKSRNRHSAQTEEPVQAKVFSRK	_NRHS(ph)AQTEEPVQAK_	PAK_group;PKA_group	PAK1;PRKACA	0.19855	0.2139	1.25625					Casein kinase I substrate motif;Casein kinase II substrate motif;PKA kinase substrate motif;PKC kinase substrate motif
E7ETA6	1757	E7ETA6;E7EV56;Q15154	1757;1711;1765	E7ETA6;H0YBA1;A6NNN6;E7EV56;Q15154	1757;505;464;1711;1765	Pericentriolar material 1 protein	PCM1;PCM1;PCM1;PCM1;PCM1	S			0.0311129	-0.366429	-0.230211	-0.366429				1	2.39e-23	138.11	0.980387	34.715	17.374	1032.75	0.84133	QTQTSEVYDGPKNVRSDISDQEEDEESEGCP	_NVRS(ph)DIS(ph)DQEEDEESEGCPVSINLSK_	PAK_group	PAK1	0.1377	0.1893	1.2924					Casein kinase I substrate motif;Casein kinase II substrate motif;PKA kinase substrate motif
E7ETA6	1760	E7ETA6;E7EV56;Q15154	1760;1714;1768	E7ETA6;H0YBA1;A6NNN6;E7EV56;Q15154	1760;508;467;1714;1768	Pericentriolar material 1 protein	PCM1;PCM1;PCM1;PCM1;PCM1	S			-0.0883468	-0.151747	-0.230211	-0.0883468				1	3.15e-23	136.01	0.940924	34.715	12.1826	1032.75	0.84133	TSEVYDGPKNVRSDISDQEEDEESEGCPVSI	_NVRS(ph)DIS(ph)DQEEDEESEGCPVSINLSK_	CK1_group	CSNK1A1;CSNK1D	0.1104	0.32905	2.2752					Casein kinase II substrate motif
E7ETA6	861	E7ETA6;E7EV56;Q15154	861;862;861	E7ETA6;E7EV56;Q15154	861;862;861	Pericentriolar material 1 protein	PCM1;PCM1;PCM1	S			0.122607	-0.0243845	0.0900404	0.0900404				1	0.000785348	93.684	0.998418	58.997	28.9028	789.898	0.926	LMAEHQRRQGLAETASPVAVSLRSDGSENLC	_QGLAETAS(ph)PVAVSLR_	CK1_group;GSK3_group	CSNK1D;GSK3B	0.0461	0.50175	1.4715					Casein kinase I substrate motif;ERK1,2 kinase substrate motif;GSK-3, ERK1, ERK2, CDK5 substrate motif;WW domain binding motif
E7ETA6	65	E7ETA6;E7EV56;Q15154	65;65;65	E7ETA6;E7EV56;E7EV93;E9PGW9;E5RGQ4;Q15154	65;65;65;65;65;65	Pericentriolar material 1 protein	PCM1;PCM1;PCM1;PCM1;PCM1;PCM1	S			-0.043869	-0.0807133	-0.101412	-0.0807133				1	2.51e-46	192.21	0.999998	175.01	56.4964	797.859	0.6744	KKFGVESDKRVTNDISPESSPGVGRRRTKTP	_VTNDIS(ph)PESSPGVGR_	GSK3_group;MAPK3_MAPK1_MAPK7_NLK_group	GSK3B;MAPK3	0.1698	0.401	2.742					Casein kinase I substrate motif;Casein kinase II substrate motif;ERK1,2 kinase substrate motif;G protein-coupled receptor kinase 1 substrate motif;GSK3 kinase substrate motif;GSK-3, ERK1, ERK2, CDK5 substrate motif;WW domain binding motif
E7ETA6	68	E7ETA6;E7EV56;Q15154	68;68;68	E7ETA6;E7EV56;E7EV93;E9PGW9;E5RGQ4;Q15154	68;68;68;68;68;68	Pericentriolar material 1 protein	PCM1;PCM1;PCM1;PCM1;PCM1;PCM1	S			0.00144204	-0.0147473	0.167615	0.028852				1	1.3e-28	139.98	0.903906	139.98	9.73416	837.842	0.13352	GVESDKRVTNDISPESSPGVGRRRTKTPHTF	_VTNDIS(ph)PES(ph)SPGVGR_	CK1_group	CSNK1D	0.0998	0.4325	2.7662					b-Adrenergic Receptor kinase substrate motif
E7ETA6	69	E7ETA6;E7EV56;Q15154	69;69;69	E7ETA6;E7EV56;E7EV93;E9PGW9;E5RGQ4;Q15154	69;69;69;69;69;69	Pericentriolar material 1 protein	PCM1;PCM1;PCM1;PCM1;PCM1;PCM1	S			0.450063		-0.120545	0.164786				1	2.51e-46	129.77	0.891191	53.454	9.01356	837.842	0.62995	VESDKRVTNDISPESSPGVGRRRTKTPHTFP	_VTNDIS(ph)PESS(ph)PGVGR_	CDK2_CDK3_CDK1_CDK5_group;CK1_group;GSK3_group	CDK1;CSNK1D;GSK3B	0.0861	0.4325	1.873					ERK1,2 kinase substrate motif;GSK-3, ERK1, ERK2, CDK5 substrate motif;MAPKAPK2 kinase substrate motif;MDC1 BRCT domain binding motif;Plk1 PBD domain binding motif;WW domain binding motif
E7ETA6	1229	E7ETA6;E7EV56;Q15154	1229;1230;1229	E7ETA6;E7EV56;Q15154	1229;1230;1229	Pericentriolar material 1 protein	PCM1;PCM1;PCM1	S			0.958583	0.0582473		0.508429				1	0.00504259	71.806	0.978274	71.806	16.545	517.234	0.21986	EQEGEVEKPFIKTGFSVSVEKSTSSNRKNQL	_TGFS(ph)VSVEK_	CK1_group;GSK3_group	CSNK1A1;CSNK1D;GSK3B	0.1075	0.4325	1.8882					Casein kinase II substrate motif;PKA kinase substrate motif
E7ETA6	1231	E7ETA6;E7EV56;Q15154	1231;1232;1231	E7ETA6;E7EV56;Q15154	1231;1232;1231	Pericentriolar material 1 protein	PCM1;PCM1;PCM1	S			0.433387	0.25181	0.357946	0.357946				1	0.00177807	83.617	0.992957	80.69	21.4917	517.234	-0.65807	EGEVEKPFIKTGFSVSVEKSTSSNRKNQLDT	_TGFSVS(ph)VEK_	CK1_group;GSK3_group;PKC_group	CSNK1D;GSK3B;PRKCA;PRKCB	0.11835	0.3199	1.4737					Casein kinase II substrate motif;G protein-coupled receptor kinase 1 substrate motif;GSK3 kinase substrate motif
E7ETA6	93	E7ETA6;E7EV56;Q15154	93;93;93	E7ETA6;E7EV56;E7EV93;E9PGW9;E5RGQ4;Q15154	93;93;93;93;93;93	Pericentriolar material 1 protein	PCM1;PCM1;PCM1;PCM1;PCM1;PCM1	S			0.734482	0.388686		0.570463				1	1.4e-54	188.9	1	188.9	84.6009	933.388	-0.98341	KTPHTFPHSRYMSQMSVPEQAELEKLKQRIN	_YM(ox)SQMS(ph)VPEQAELEK_	CK1_group;GSK3_group	CSNK1A1;CSNK1D;GSK3B	0.122	0.4325	2.6302					Casein kinase II substrate motif
E7ETA6	1557	E7ETA6	1557	E7ETA6	1557		PCM1	T			-0.51837	-0.149553	-0.11221	-0.149553				1	8.63e-10	134.47	1	134.47	134.465	968.438	0.56793	CTCRIIEDGDGAGAETPVIENRSSQQPVSEV	_IIEDGDGAGAET(ph)PVIENR_	CDK2_CDK3_CDK1_CDK5_group;CK1_group;GSK3_group	CDK1;CSNK1D;GSK3B	0.0748	0.4325	1.5594					b-Adrenergic Receptor kinase substrate motif;GSK-3, ERK1, ERK2, CDK5 substrate motif;WW domain binding motif
E7ETY2	906	E7ETY2;E9PHK9	906;906	E7ETY2;J3KQ96;H0YAB7;E9PHK9;Q13428	906;906;65;906;906	Treacle protein	TCOF1;TCOF1;TCOF1;TCOF1	S			0.257373	0.252658	0.231801	0.245009				1	2.15e-21	181.26	1	174.39	174.395	659.848	0.28829	GKTHQIRAALAPAKESPRKGAAPTPPGKTGP	_AALAPAKES(ph)PRK_	CDK2_CDK3_CDK1_CDK5_group;PKC_group	CDK1;CDK2;PRKCB	0.3207	0.3556	1.0697					b-Adrenergic Receptor kinase substrate motif;Cdc2 kinase substrate motif;CDK kinase substrate motif;CDK1,2,4,6 kinase substrate motif;ERK1,2 kinase substrate motif;Growth associated histone HI kinase substrate motif;GSK-3, ERK1, ERK2, CDK5 substrate motif;PKA kinase substrate motif;PKC kinase substrate motif;WW domain binding motif
E7ETY2	1410	E7ETY2;E9PHK9	1410;1447	E7ETY2;J3KQ96;E9PHK9;Q13428	1410;1372;1447;1410	Treacle protein	TCOF1;TCOF1;TCOF1	S		+	-1.52703	-1.46144	-1.43878	-1.48374				1	1.97e-144	249.51	0.999999	141.7	59.1394	661.297	-0.93331	ASGDVKEKKGKGSLGSQGAKDEPEEELQKGM	_GSLGS(ph)QGAKDEPEEELQK_	CK1_group;CK2_group;PKC_group	CSNK1A1;CSNK2A2;PRKCA;PRKCB	0.1348	0.21605	1.27795					ATM kinase substrate motif;DNA dependent Protein kinase substrate motif
E7ETY2	1376	E7ETY2;E9PHK9	1376;1413	E7ETY2;J3KQ96;E9PHK9;Q13428	1376;1338;1413;1376	Treacle protein	TCOF1;TCOF1;TCOF1	S			-0.277761	0.0946415	0.0476779	0.047678				1	1.35e-156	325.29	1	86.539	86.5392	774.305	-0.04381	SKKKKKLGAGEGGEASVSPEKTSTTSKGKAK	_LGAGEGGEAS(ph)VS(ph)PEK_	CK1_group;CK2_group	CSNK1A1;CSNK2A1;CSNK2A2	0.1975	0.4291	2.6787					Casein kinase II substrate motif
E7ETY2	1378	E7ETY2;E9PHK9	1378;1415	E7ETY2;J3KQ96;E9PHK9;Q13428	1378;1340;1415;1378	Treacle protein	TCOF1;TCOF1;TCOF1	S			0.0784732	-0.00317744	-0.00715905	0.0247452				1	1.74e-255	380.92	1	86.539	86.5392	774.305	-0.04381	KKKKLGAGEGGEASVSPEKTSTTSKGKAKRD	_LGAGEGGEAS(ph)VS(ph)PEK_	CDK2_CDK3_CDK1_CDK5_group;CK2_group;MAPK3_MAPK1_MAPK7_NLK_group	CDK1;CDK2;CSNK2A2;MAPK3	0.20995	0.39985	1.1652					Casein kinase I substrate motif;Casein kinase II substrate motif;Cdc2 kinase substrate motif;CDK kinase substrate motif;CDK1,2,4,6 kinase substrate motif;ERK1,2 kinase substrate motif;G protein-coupled receptor kinase 1 substrate motif;GSK-3, ERK1, ERK2, CDK5 substrate motif;WW domain binding motif
E7ETY2	1350	E7ETY2;E9PHK9	1350;1387	E7ETY2;J3KQ96;E9PHK9;Q13428	1350;1312;1387;1350	Treacle protein	TCOF1;TCOF1;TCOF1	S			-0.161282	-0.192793	-0.151506	-0.175289				1	1.85e-19	183.06	1	54.023	54.0231	427.21	-1.534	KESSRKGWESRKRKLSGDQPAARTPRSKKKK	_RKLS(ph)GDQ(de)PAAR_	CaMKII_group;CK2_group;PAK_group;PKA_group	CAMK2A;CSNK2A2;PAK1;PRKACA	0.16445	0.1764	1.6317					14-3-3 domain binding motif;Akt kinase substrate motif;Calmodulin-dependent protein kinase II substrate motif;G protein-coupled receptor kinase 1 substrate motif;MAPKAPK1 kinase substrate motif;Pim1 kinase substrate sequence;PKA kinase substrate motif;PKC epsilon kinase substrate motif;PKC kinase substrate motif
E7ETY2	1110	E7ETY2	1110	E7ETY2;J3KQ96	1110;1073		TCOF1	S			-0.166422	-0.168139		-0.166422				1	6.38e-15	123.09	0.917059	123.09	13.3806	988.483	1.1281	PATQVDSAVGTLPATSPQSTSVQAKGTNKLR	_KQEGPATQVDSAVGTLPATS(ph)PQSTSVQAK_										Casein kinase I substrate motif;Casein kinase II substrate motif;ERK1,2 kinase substrate motif;G protein-coupled receptor kinase 1 substrate motif;GSK-3, ERK1, ERK2, CDK5 substrate motif;WW domain binding motif
E7ETY2	171	E7ETY2;E9PHK9	171;171	E7ETY2;J3KQ96;E9PHK9;Q13428	171;171;171;171	Treacle protein	TCOF1;TCOF1;TCOF1	S			-0.111804	-0.0382878	-0.113036	-0.111804				1	2.59e-42	180.83	0.997369	151.49	26.0701	986.792	1.1332	SPRKSAEPSANTTLVSETEEEGSVPAFGAAA	_KSAEPSANTTLVS(ph)ETEEEGSVPAFGAAAK_	CK1_group;CK2_group	CSNK1A1;CSNK2A1;CSNK2A2	0.4541	0.4291	8.4081					Casein kinase II substrate motif;G protein-coupled receptor kinase 1 substrate motif
E7ETY2	110	E7ETY2;E9PHK9	110;110	E7ETY2;J3KQ96;H0YA99;E9PHK9;Q13428	110;110;98;110;110	Treacle protein	TCOF1;TCOF1;TCOF1;TCOF1	S			0.594071			0.594071				1	0.000137662	88.684	0.738045	88.684	4.6581	929.437	1.3303	EAETAKATPRLASTNSSVLGADLPSSMKEKA	_LASTNS(ph)SVLGADLPSSMK_	CK2_group;PAK_group	CSNK2A2;PAK1	0.11565	0.4206	2.01745
E7ETY2	1228	E7ETY2;E9PHK9	1228;1265	E7ETY2;J3KQ96;E9PHK9;Q13428	1228;1190;1265;1228	Treacle protein	TCOF1;TCOF1;TCOF1	S			0.00992034	-0.121879	-0.15125	-0.121879				1	7.01e-12	141	0.891387	111.92	9.14869	721.842	0.0052055	PANSQASKATPKLDSSPSVSSTLAAKDDPDG	_LDSS(ph)PSVSSTLAAK_										Casein kinase I substrate motif;Casein kinase II substrate motif;ERK1,2 kinase substrate motif;G protein-coupled receptor kinase 1 substrate motif;GSK3 kinase substrate motif;GSK-3, ERK1, ERK2, CDK5 substrate motif;MDC1 BRCT domain binding motif;PKA kinase substrate motif;Plk1 PBD domain binding motif;WW domain binding motif
E7ETY2	582	E7ETY2;E9PHK9	582;582	E7ETY2;J3KQ96;E9PHK9;Q13428	582;582;582;582	Treacle protein	TCOF1;TCOF1;TCOF1	S				0.115433	0.157044	0.136323				1	1.61e-43	211.13	0.591195	149.18	1.7949	734.379	1.906	AQEKSLGNILQAKPTSSPAKGPPQKAGPVAV	_SLGNILQ(de)AKPTS(ph)SPAKGPPQ(de)K_	CK2_group;PAK_group	CSNK2A2;PAK1	0.07905	0.4206	1.96655					PKA kinase substrate motif;PKC kinase substrate motif
E7ETY2	583	E7ETY2;E9PHK9	583;583	E7ETY2;J3KQ96;E9PHK9;Q13428	583;583;583;583	Treacle protein	TCOF1;TCOF1;TCOF1	S			0.292428	-0.0400667	0.250962	0.12618				1	1.85e-82	255.2	0.956945	255.2	13.4902	733.723	-0.57107	QEKSLGNILQAKPTSSPAKGPPQKAGPVAVQ	_SLGNILQAKPTSS(ph)PAKGPPQK_	CDK2_CDK3_CDK1_CDK5_group;MAPK3_MAPK1_MAPK7_NLK_group	CDK1;CDK2;MAPK3	0.3237	0.3715	1.1981					Cdc2 kinase substrate motif;CDK kinase substrate motif;CDK1,2,4,6 kinase substrate motif;ERK1,2 kinase substrate motif;Growth associated histone HI kinase substrate motif;GSK-3, ERK1, ERK2, CDK5 substrate motif;MDC1 BRCT domain binding motif;PKA kinase substrate motif;Plk1 PBD domain binding motif;WW domain binding motif
E7ETY2	1019	E7ETY2;E9PHK9	1019;1019	E7ETY2;J3KQ96;E9PHK9;Q13428	1019;982;1019;982	Treacle protein	TCOF1;TCOF1;TCOF1	S	+		1.44816	1.25604	2.1574	1.43797				1	1.36e-124	235.99	0.704628	154.79	3.77815	915.431	1.0862	SPAGPAATPAQAQAASTPRKARASESTARSS	_SPAGPAATPAQAQAAS(ph)TPR_	CK2_group;PKC_group	CSNK2A2;PRKCA;PRKCB;PRKCZ	0.3368	0.2369	2.12465
E7ETY2	381	E7ETY2;E9PHK9	381;381	E7ETY2;J3KQ96;E9PHK9;Q13428	381;381;381;381	Treacle protein	TCOF1;TCOF1;TCOF1	S			0.0978804	-0.00845004	0.0630888	0.0322419				1	5.33e-106	277.48	1	180.13	71.1091	546.261	-0.32328	GKTSQVGAASAPAKESPRKGAAPAPPGKTGP	_TSQVGAASAPAKES(ph)PR_	CDK2_CDK3_CDK1_CDK5_group;PKC_group	CDK1;CDK2;PRKCB	0.3289	0.3556	1.1033					b-Adrenergic Receptor kinase substrate motif;Cdc2 kinase substrate motif;CDK kinase substrate motif;CDK1,2,4,6 kinase substrate motif;ERK1,2 kinase substrate motif;Growth associated histone HI kinase substrate motif;GSK-3, ERK1, ERK2, CDK5 substrate motif;PKA kinase substrate motif;PKC kinase substrate motif;WW domain binding motif
E7ETY2	156	E7ETY2;E9PHK9	156;156	E7ETY2;J3KQ96;E9PHK9;Q13428	156;156;156;156	Treacle protein	TCOF1;TCOF1;TCOF1	S	+		1.17402	1.17836	1.2784	1.18663				1	2.38e-53	232.26	0.99991	200.94	40.4695	662.337	0.23899	HPATGKTVANLLSGKSPRKSAEPSANTTLVS	_TVAN(de)LLSGKS(ph)PR_	CDK2_CDK3_CDK1_CDK5_group;PKC_group	CDK1;CDK2;PRKCA;PRKCB	0.26365	0.3214	1.12455					Casein kinase I substrate motif;Cdc2 kinase substrate motif;CDK kinase substrate motif;CDK1,2,4,6 kinase substrate motif;ERK1,2 kinase substrate motif;G protein-coupled receptor kinase 1 substrate motif;Growth associated histone HI kinase substrate motif;GSK3 kinase substrate motif;GSK-3, ERK1, ERK2, CDK5 substrate motif;PKA kinase substrate motif;PKC kinase substrate motif;WW domain binding motif
E7ETY2	914	E7ETY2;E9PHK9	914;914	E7ETY2;J3KQ96;H0YAB7;E9PHK9;Q13428	914;914;73;914;914	Treacle protein	TCOF1;TCOF1;TCOF1;TCOF1	T			0.0607391	0.0799754	0.118227	0.0799754				1	0.000339712	98.253	1	96.464	96.4641	502.252	0.51779	ALAPAKESPRKGAAPTPPGKTGPSAAQAGKQ	_KGAAPT(ph)PPGK_	CDK2_CDK3_CDK1_CDK5_group;MAPK3_MAPK1_MAPK7_NLK_group	CDK2;MAPK1;MAPK3	0.2338	0.3556	1.044					DNA dependent Protein kinase substrate motif;GSK-3, ERK1, ERK2, CDK5 substrate motif;WW domain binding motif
E7ETY2	1358	E7ETY2;E9PHK9	1358;1395	E7ETY2;J3KQ96;E9PHK9;Q13428	1358;1320;1395;1358	Treacle protein	TCOF1;TCOF1;TCOF1	T				1.80822	1.38178	1.59498				1	5e-05	85.087	1	67.644	67.6437	778.853	-3.7242	ESRKRKLSGDQPAARTPRSKKKKKLGAGEGG	_KLS(ph)GDQPAART(ph)PR_	CDK2_CDK3_CDK1_CDK5_group;MAPK3_MAPK1_MAPK7_NLK_group;PKC_group	CDK1;CDK2;MAPK3;PRKCB	0.23955	0.36355	1.16195					Casein kinase I substrate motif;Casein kinase II substrate motif;Growth associated histone HI kinase substrate motif;GSK-3, ERK1, ERK2, CDK5 substrate motif;PKA kinase substrate motif;PKC kinase substrate motif;WW domain binding motif
E7ETY2	1109	E7ETY2	1109	E7ETY2;J3KQ96	1109;1072		TCOF1	T										1	0.00340987	48.085	0.48681	48.085	0.598145	988.483	0.17574	GPATQVDSAVGTLPATSPQSTSVQAKGTNKL	_KQEGPATQVDSAVGTLPAT(ph)SPQSTSVQAK_	CK2_group	CSNK2A2	0.0154	0.667	1.1923					G protein-coupled receptor kinase 1 substrate motif
E7ETY2	167	E7ETY2;E9PHK9	167;167	E7ETY2;J3KQ96;E9PHK9;Q13428	167;167;167;167	Treacle protein	TCOF1;TCOF1;TCOF1	T										1	0.00312299	48.422	0.429234	48.422	0	1013.45	0.88307	LSGKSPRKSAEPSANTTLVSETEEEGSVPAF	_KSAEPSANT(ph)TLVS(ph)ETEEEGSVPAFGAAAK_	CK1_group;CK2_group	CSNK1A1;CSNK2A2	0.0812	0.3986	2.00325					G protein-coupled receptor kinase 1 substrate motif
E7ETY2	168	E7ETY2;E9PHK9	168;168	E7ETY2;J3KQ96;E9PHK9;Q13428	168;168;168;168	Treacle protein	TCOF1;TCOF1;TCOF1	T										1	0.00312299	48.422	0.429234	48.422	0	1013.45	0.88307	SGKSPRKSAEPSANTTLVSETEEEGSVPAFG	_KSAEPSANT(ph)TLVS(ph)ETEEEGSVPAFGAAAK_	CK2_group	CSNK2A2	0.0694	0.667	3.0758					Casein kinase I substrate motif;Casein kinase II substrate motif;MAPKAPK2 kinase substrate motif
E7ETY2	173	E7ETY2;E9PHK9	173;173	E7ETY2;J3KQ96;E9PHK9;Q13428	173;173;173;173	Treacle protein	TCOF1;TCOF1;TCOF1	T										1	0.000678479	51.22	0.482522	51.22	0	944.094	0.96647	RKSAEPSANTTLVSETEEEGSVPAFGAAAKP	_SAEPSANTTLVS(ph)ETEEEGSVPAFGAAAK_	CK2_group	CSNK2A1;CSNK2A2	0.3724	0.54805	7.6597					b-Adrenergic Receptor kinase substrate motif;Casein kinase II substrate motif;G protein-coupled receptor kinase 1 substrate motif
E7ETY2	581	E7ETY2;E9PHK9	581;581	E7ETY2;J3KQ96;E9PHK9;Q13428	581;581;581;581	Treacle protein	TCOF1;TCOF1;TCOF1	T										1	7.95e-15	107.74	0.403152	107.74	1.30637	734.379	1.2812	PAQEKSLGNILQAKPTSSPAKGPPQKAGPVA	_SLGN(de)ILQAKPT(ph)SSPAKGPPQ(de)K_	CK2_group	CSNK2A2	0.0274	0.667	2.6433					DNA dependent Protein kinase substrate motif;G protein-coupled receptor kinase 1 substrate motif;PKA kinase substrate motif;PKC kinase substrate motif
E7ETY2	1020	E7ETY2;E9PHK9	1020;1020	E7ETY2;J3KQ96;E9PHK9;Q13428	1020;983;1020;983	Treacle protein	TCOF1;TCOF1;TCOF1	T					2.88702	2.88702				1	0.00973714	48.224	0.499985	48.224	0	610.623	1.6801	PAGPAATPAQAQAASTPRKARASESTARSSS	_SPAGPAATPAQAQAAS(ph)TPR_	CDK2_CDK3_CDK1_CDK5_group	CDK1;CDK2	0.3371	0.36355	1.1109					Cdc2 kinase substrate motif;CDK1,2,4,6 kinase substrate motif;CDK5 kinase substrate motif;G protein-coupled receptor kinase 1 substrate motif;Growth associated histone HI kinase substrate motif;GSK-3, ERK1, ERK2, CDK5 substrate motif;MDC1 BRCT domain binding motif;PKA kinase substrate motif;PKC kinase substrate motif;Plk1 PBD domain binding motif;WW domain binding motif
E7ETY2	249	E7ETY2;E9PHK9	249;249	E7ETY2;J3KQ96;E9PHK9;Q13428	249;249;249;249	Treacle protein	TCOF1;TCOF1;TCOF1	T	+		2.42862	2.5169	1.45969	2.4033				1	0.00307402	92.247	1	47.915	47.9148	512.242	0.055016	PARKAAPAPGKVGDVTPQVKGGALPPAKRAK	_VGDVT(ph)PQ(de)VK_	CK2_group;MAPK3_MAPK1_MAPK7_NLK_group	CSNK2A2;MAPK3	0.076	0.5476	1.82745					GSK-3, ERK1, ERK2, CDK5 substrate motif;WW domain binding motif
E7EU23	65	E7EU23	65	E7EU23;P50395;Q5SX87;Q5SX90;Q5SX86	65;61;61;65;25	Rab GDP dissociation inhibitor beta	GDI2;GDI2;GDI2;GDI2;GDI2	S			-0.107088	-0.230397	-0.249822	-0.12268	0.201383	0.142871		0.0501558	4.81e-10	131.4	0.999999	131.4	60.0427	741.844	-1.184	ITPLEDLYKRFKIPGSPPESMGRGRDWNVDL	_FKIPGS(ph)PPESMGR_	MAPK3_MAPK1_MAPK7_NLK_group	MAPK3	0.1874	0.292	1.4376					Casein kinase I substrate motif;Casein kinase II substrate motif;ERK1,2 kinase substrate motif;G protein-coupled receptor kinase 1 substrate motif;GSK3 kinase substrate motif;GSK-3, ERK1, ERK2, CDK5 substrate motif;PKA kinase substrate motif;WW domain binding motif
E7EV56	1319	E7EV56	1319	E7EV56	1319		PCM1	S			0.0501883			0.0501882				1	0.000631775	80.632	0.964829	80.632	14.3857	720.797	1.9814	NSTQLKSRVKNIKTGSDFSMFEALRDTIYSE	_TGS(ph)DFSMFEALR_	CK1_group	CSNK1D	0.08	0.4325	1.7235					AMP-activated protein kinase substrate motif;Casein kinase I substrate motif;Casein kinase II substrate motif;HMGCoA Reductase kinase substrate motif;PKA kinase substrate motif;PKC kinase substrate motif
E7EVA0	14	E7EVA0	14	E7EVA0;P27816;B9ZVR1;H7C456	14;14;14;21	Microtubule-associated protein;Microtubule-associated protein 4;Microtubule-associated protein	MAP4;MAP4;MAP4;MAP4	S			0.0284277			0.0284277				1	1.43e-05	87.659	0.973351	87.659	15.626	1231.59	0.090428	__MADLSLADALTEPSPDIEGEIKRDFIATL	_(ac)ADLSLADALTEPS(ph)PDIEGEIKR_	CDK2_CDK3_CDK1_CDK5_group;CK1_group	CDK1;CSNK1A1	0.09815	0.62925	4.542					DNA dependent Protein kinase substrate motif;ERK1,2 kinase substrate motif;GSK-3, ERK1, ERK2, CDK5 substrate motif;WW domain binding motif
E7EVA0	375	E7EVA0	375	E7EVA0;P27816	375;358	Microtubule-associated protein;Microtubule-associated protein 4	MAP4;MAP4	S			0.0874628	0.0391384	0.0618453	0.0844725				1	3.88e-34	179.85	1	123.4	110.096	669.33	0.13837	APAKDVTLLKETERASPIKMDLAPSKDMGPP	_AS(ph)PIKMDLAPSK_	CDK2_CDK3_CDK1_CDK5_group;CK1_group;MAPK3_MAPK1_MAPK7_NLK_group	CDK1;CDK5;CSNK1A1;MAPK3	0.20465	0.39185	1.31685					Casein kinase I substrate motif;Cdc2 kinase substrate motif;CDK kinase substrate motif;CDK1,2,4,6 kinase substrate motif;ERK1,2 kinase substrate motif;GSK-3, ERK1, ERK2, CDK5 substrate motif;PKA kinase substrate motif;PKC kinase substrate motif;WW domain binding motif
E7EVA0	297	E7EVA0	297	E7EVA0;P27816;B9ZVR1;H7C456	297;280;280;249	Microtubule-associated protein;Microtubule-associated protein 4;Microtubule-associated protein	MAP4;MAP4;MAP4;MAP4	S			0.0606008	-0.0268369	0.0738202	0.0589399				1	7.33e-85	270.72	0.999785	252.21	36.6776	814.386	-0.63522	ALATKTEVALAKDMESPTKLDVTLAKDMQPS	_DMES(ph)PTKLDVTLAK_	CDK2_CDK3_CDK1_CDK5_group	CDK1;CDK5	0.2623	0.6762	11.6122					b-Adrenergic Receptor kinase substrate motif;Casein kinase I substrate motif;Casein kinase II substrate motif;Cdc2 kinase substrate motif;CDK kinase substrate motif;CDK1,2,4,6 kinase substrate motif;ERK1,2 kinase substrate motif;GSK-3, ERK1, ERK2, CDK5 substrate motif;PKA kinase substrate motif;WW domain binding motif
E7EVA0	524	E7EVA0	524	E7EVA0;P27816	524;507	Microtubule-associated protein;Microtubule-associated protein 4	MAP4;MAP4	S			0.0835197	-0.0202381	-0.0619928	0.0214797				1	8.14e-08	117.4	0.999998	117.4	57.8869	794.835	-0.35221	VAPSTVKEVGLLKDMSPLSETEMALGKDVTP	_DMS(ph)PLSETEMALGK_	CDK2_CDK3_CDK1_CDK5_group	CDK1	0.096	0.944	9.6845					Calmodulin-dependent protein kinase II substrate motif;Casein kinase I substrate motif;Casein kinase II substrate motif;Chk1 kinase substrate motif;ERK1,2 kinase substrate motif;GSK-3, ERK1, ERK2, CDK5 substrate motif;PKA kinase substrate motif;PKC kinase substrate motif;WW domain binding motif
E7EVA0	1841	E7EVA0	1841	E7EVA0;P27816;E9PGM5;B9ZVR1;F8W9U4;H7C4C5;H0Y2V1;B5MEG9	1841;696;431;424;519;107;134;431	Microtubule-associated protein;Microtubule-associated protein 4;Microtubule-associated protein;Microtubule-associated protein;Microtubule-associated protein;Microtubule-associated protein;Microtubule-associated protein	MAP4;MAP4;MAP4;MAP4;MAP4;MAP4;MAP4;MAP4	S	+		0.640158	0.808673	0.610228	0.640158				1	0.000231368	99.343	1	49.934	49.9341	552.77	0.65278	TGNDITTPPNKELPPSPEKKTKPLATTQPAK	_ELPPS(ph)PEKK_	CDK2_CDK3_CDK1_CDK5_group;MAPK3_MAPK1_MAPK7_NLK_group	CDK1;CDK5;MAPK3	0.3558	0.4084	1.6024					Casein kinase II substrate motif;Cdc2 kinase substrate motif;CDK kinase substrate motif;CDK1,2,4,6 kinase substrate motif;DNA dependent Protein kinase substrate motif;ERK1,2 kinase substrate motif;GSK-3, ERK1, ERK2, CDK5 substrate motif;WW domain binding motif
E7EVA0	653	E7EVA0	653	E7EVA0;P27816	653;636	Microtubule-associated protein;Microtubule-associated protein 4	MAP4;MAP4	S			0.102457	0.277628	0.0270125	0.0713508				1	4.25e-58	228.68	1	117.26	85.3078	562.255	-1.0188	FMISPETVTGTGKKCSLPAEEDSVLEKLGER	_KCS(ph)LPAEEDSVLEK_	PKA_group	PRKACA	0.2389	0.2678	1.3186					Phosphorylase kinase substrate motif;PKA kinase substrate motif;PKC kinase substrate motif
E7EVA0	1679	E7EVA0	1679	E7EVA0;E9PGM5;B5MEG9	1679;269;269	Microtubule-associated protein;Microtubule-associated protein	MAP4;MAP4;MAP4	S			-0.0164537	0.0350608	0.024036	0.0174944				1	1.86e-06	136.7	0.999997	136.7	55.7189	533.283	0.56303	KGSDSLNKKVDLTLLSPKSENDKLKEISLAC	_VDLTLLS(ph)PK_	CDK2_CDK3_CDK1_CDK5_group;MAPK3_MAPK1_MAPK7_NLK_group	CDK1;CDK5;MAPK3	0.2576	0.4084	1.5332					Casein kinase I substrate motif;Casein kinase II substrate motif;ERK1,2 kinase substrate motif;Growth associated histone HI kinase substrate motif;GSK-3, ERK1, ERK2, CDK5 substrate motif;PKA kinase substrate motif;PKC kinase substrate motif;WW domain binding motif
E7EVA0	2073	E7EVA0	2073	E7EVA0;P27816;E9PGM5;B9ZVR1;F8W9U4;H7C4C5;H0Y2V1;B5MEG9;B4DSQ1	2073;928;663;656;659;339;294;663;80	Microtubule-associated protein;Microtubule-associated protein 4;Microtubule-associated protein;Microtubule-associated protein;Microtubule-associated protein;Microtubule-associated protein;Microtubule-associated protein;Microtubule-associated protein	MAP4;MAP4;MAP4;MAP4;MAP4;MAP4;MAP4;MAP4;MAP4	S			0.349592	0.724912	0.521955	0.518233				1	1.27e-15	177.36	0.991829	177.36	20.8417	605.789	-0.32029	PSSTTPRLSRLATNTSAPDLKNVRSKVGSTE	_LATNTS(ph)APDLK_										Casein kinase II substrate motif;Pyruvate dehydrogenase kinase substrate motif
E7EVA0	1932	E7EVA0	1932	E7EVA0;P27816;E9PGM5;B9ZVR1;F8W9U4;H7C4C5;H0Y2V1;B5MEG9	1932;787;522;515;538;198;153;522	Microtubule-associated protein;Microtubule-associated protein 4;Microtubule-associated protein;Microtubule-associated protein;Microtubule-associated protein;Microtubule-associated protein;Microtubule-associated protein	MAP4;MAP4;MAP4;MAP4;MAP4;MAP4;MAP4;MAP4	S			-0.0841349			-0.084135				1	0.000348018	80.738	0.975544	40.52	16.3289	731.862	2.5267	KPKPIADAKAPEKRASPSKPASAPASRSGSK	_RAS(ph)PSKPASAPASR_	CDK2_CDK3_CDK1_CDK5_group;MAPK3_MAPK1_MAPK7_NLK_group	CDK1;CDK5;MAPK3	0.2998	0.4084	1.2157					Casein kinase II substrate motif;Cdc2 kinase substrate motif;CDK kinase substrate motif;CDK1,2,4,6 kinase substrate motif;ERK1,2 kinase substrate motif;G protein-coupled receptor kinase 1 substrate motif;GSK-3, ERK1, ERK2, CDK5 substrate motif;PAK2 kinase substrate motif;PKA kinase substrate motif;PKC kinase substrate motif;WW domain binding motif
E7EVA0	2086	E7EVA0	2086	E7EVA0;P27816;E9PGM5;B9ZVR1;F8W9U4;H7C4C5;H0Y2V1;B4DSQ1	2086;941;676;669;672;352;307;93	Microtubule-associated protein;Microtubule-associated protein 4;Microtubule-associated protein;Microtubule-associated protein;Microtubule-associated protein;Microtubule-associated protein;Microtubule-associated protein;Microtubule-associated protein	MAP4;MAP4;MAP4;MAP4;MAP4;MAP4;MAP4;MAP4	S			0.208018	0.0713507	0.140386	0.140386				1	1.28e-25	199.38	0.997881	118.28	26.7292	464.705	0.80019	NTSAPDLKNVRSKVGSTENIKHQPGGGRAKV	_VGS(ph)TEN(de)IK_	PKC_group	PRKCA;PRKCB	0.1533	0.3358	1.18795					Casein kinase II substrate motif;MAPKAPK2 kinase substrate motif;PKA kinase substrate motif;PKC kinase substrate motif
E7EVA0	1970	E7EVA0	1970	E7EVA0;P27816;E9PGM5;B9ZVR1;F8W9U4;H7C4C5;H0Y2V1;B5MEG9	1970;825;560;553;576;236;191;560	Microtubule-associated protein;Microtubule-associated protein 4;Microtubule-associated protein;Microtubule-associated protein;Microtubule-associated protein;Microtubule-associated protein;Microtubule-associated protein	MAP4;MAP4;MAP4;MAP4;MAP4;MAP4;MAP4;MAP4	S			0.387363	0.423847	0.235114	0.387363				1	0.000143669	129.28	0.957898	99.568	13.7608	461.736	-0.082916	TTTAAAVASTGPSSRSPSTLLPKKPTAIKTE	_S(ph)PSTLLPK_	CDK2_CDK3_CDK1_CDK5_group;CK1_group;MAPK3_MAPK1_MAPK7_NLK_group	CDK1;CSNK1A1;MAPK1;MAPK3	0.2316	0.41125	1.7715					Casein kinase I substrate motif;Casein kinase II substrate motif;ERK1,2 kinase substrate motif;Growth associated histone HI kinase substrate motif;GSK-3, ERK1, ERK2, CDK5 substrate motif;WW domain binding motif
E7EVA0	1967	E7EVA0	1967	E7EVA0;P27816;E9PGM5;B9ZVR1;F8W9U4;H7C4C5;H0Y2V1;B5MEG9	1967;822;557;550;573;233;188;557	Microtubule-associated protein;Microtubule-associated protein 4;Microtubule-associated protein;Microtubule-associated protein;Microtubule-associated protein;Microtubule-associated protein;Microtubule-associated protein	MAP4;MAP4;MAP4;MAP4;MAP4;MAP4;MAP4;MAP4	S										1	0.000143669	70.718	0.248597	70.465	0	761.053	0.019126	VAKTTTAAAVASTGPSSRSPSTLLPKKPTAI	_TTTAAAVASTGPS(ph)SRSPSTLLPK_	CK1_group;PKC_group	CSNK1A1;PRKCA;PRKCB	0.2185	0.3277	1.152					Casein kinase I substrate motif;Casein kinase II substrate motif;DNA dependent Protein kinase substrate motif;G protein-coupled receptor kinase 1 substrate motif;MAPKAPK2 kinase substrate motif;PKA kinase substrate motif;PKC kinase substrate motif
E7EVA0	1968	E7EVA0	1968	E7EVA0;P27816;E9PGM5;B9ZVR1;F8W9U4;H7C4C5;H0Y2V1;B5MEG9	1968;823;558;551;574;234;189;558	Microtubule-associated protein;Microtubule-associated protein 4;Microtubule-associated protein;Microtubule-associated protein;Microtubule-associated protein;Microtubule-associated protein;Microtubule-associated protein	MAP4;MAP4;MAP4;MAP4;MAP4;MAP4;MAP4;MAP4	S										1	0.000143669	70.718	0.248597	70.465	0	761.053	0.019126	AKTTTAAAVASTGPSSRSPSTLLPKKPTAIK	_TTTAAAVASTGPS(ph)SRSPSTLLPK_	MAPK3_MAPK1_MAPK7_NLK_group;PAK_group	MAPK3;PAK1	0.11975	0.3632	1.30295					Casein kinase II substrate motif;G protein-coupled receptor kinase 1 substrate motif;GSK3 kinase substrate motif;MDC1 BRCT domain binding motif;Plk1 PBD domain binding motif
E7EVA0	2218	E7EVA0	2218	E7EVA0;P27816;E9PGM5;B9ZVR1;F8W9U4;H7C4C5;H0Y2V1;B4DSQ1	2218;1073;808;732;766;415;401;187	Microtubule-associated protein;Microtubule-associated protein 4;Microtubule-associated protein;Microtubule-associated protein;Microtubule-associated protein;Microtubule-associated protein;Microtubule-associated protein;Microtubule-associated protein	MAP4;MAP4;MAP4;MAP4;MAP4;MAP4;MAP4;MAP4	S			0.307545	0.198494	0.288536	0.285225				1	9.1e-69	243.09	1	178.41	178.407	836.409	1.0014	SQKLNFKEKAQAKVGSLDNVGHLPAGGAVKT	_VGS(ph)LDN(de)VGHLPAGGAVK_	PKC_group	PRKCA;PRKCB;PRKCZ	0.2384	0.3277	1.2079					Phosphorylase kinase substrate motif;PKA kinase substrate motif;PKC kinase substrate motif
E7EVA0	723	E7EVA0	723	E7EVA0	723	Microtubule-associated protein	MAP4	S			0.101919	0.0067647		0.101919				1	8.6e-05	88.992	1	72.446	72.4463	728.865	0.66561	TRPKPARVPPELLGGSPPWKTLDHRLGHCSL	_VPPELLGGS(ph)PPWK_	CDK2_CDK3_CDK1_CDK5_group	CDK1;CDK5	0.3169	0.6762	16.2647					ERK1,2 kinase substrate motif;GSK-3, ERK1, ERK2, CDK5 substrate motif;WW domain binding motif
E7EVA0	538	E7EVA0	538	E7EVA0;P27816	538;521	Microtubule-associated protein;Microtubule-associated protein 4	MAP4;MAP4	T			-0.0629118	-0.0756721	-0.0411202	-0.0724676				1	0.00259679	77.051	0.999966	77.051	44.6855	539.611	0.092645	MSPLSETEMALGKDVTPPPETEVVLIKNVCL	_DVT(ph)PPPETEVVLIK_	CDK2_CDK3_CDK1_CDK5_group;MAPK3_MAPK1_MAPK7_NLK_group;TTK	CDK1;MAPK1;MAPK3;TTK	0.18765	0.41125	2.2677					Calmodulin-dependent protein kinase II substrate motif;Chk1 kinase substrate motif;GSK-3, ERK1, ERK2, CDK5 substrate motif;PKA kinase substrate motif;PKC kinase substrate motif;WW domain binding motif
E7EVA0	371	E7EVA0	371	E7EVA0;P27816	371;354	Microtubule-associated protein;Microtubule-associated protein 4	MAP4;MAP4	T					0.151209	0.151209				1	4.98e-17	88.945	0.598641	88.945	1.73634	618.301	0.92505	ETEVAPAKDVTLLKETERASPIKMDLAPSKD	_ET(ph)ERASPIKMDLAPSK_	PKC_group;TTK	PRKCA;PRKCB;TTK	0.2137	0.3439	2.0419					b-Adrenergic Receptor kinase substrate motif;G protein-coupled receptor kinase 1 substrate motif;PKA kinase substrate motif;PKC kinase substrate motif
E7EVA0	2087	E7EVA0	2087	E7EVA0;P27816;E9PGM5;B9ZVR1;F8W9U4;H7C4C5;H0Y2V1;B4DSQ1	2087;942;677;670;673;353;308;94	Microtubule-associated protein;Microtubule-associated protein 4;Microtubule-associated protein;Microtubule-associated protein;Microtubule-associated protein;Microtubule-associated protein;Microtubule-associated protein;Microtubule-associated protein	MAP4;MAP4;MAP4;MAP4;MAP4;MAP4;MAP4;MAP4	T				0.861003		0.861003				1	0.00150829	72.29	0.5	42.382	0	808.881	-0.82656	TSAPDLKNVRSKVGSTENIKHQPGGGRAKVE	_VGS(ph)TENIKHQPGGGR_	PKC_group;TTK	PRKCB;TTK	0.08135	0.34365	1.62455					G protein-coupled receptor kinase 1 substrate motif;MDC1 BRCT domain binding motif;PKA kinase substrate motif;Plk1 PBD domain binding motif
E7EWN3	609	E7EWN3	609	E7EWN3;Q9C0A6;H0Y3R4	609;590;258	SET domain-containing protein 5	SETD5;SETD5;SETD5	S					0.599984	0.599984				1	1.17e-09	122.31	0.718414	122.31	4.06764	656.798	-0.44197	TIPSTPQSVGVNTRRSSQAGDIAAEKLVPKP	_RS(ph)SQAGDIAAEK_	PAK_group	PAK1	0.1812	0.0493	1.3617					PKA kinase substrate motif;PKC kinase substrate motif
E7EWN3	610	E7EWN3	610	E7EWN3;Q9C0A6;H0Y3R4	610;591;259	SET domain-containing protein 5	SETD5;SETD5;SETD5	S			0.424385	0.0802483		0.252295				1	5.96e-104	157.84	0.867231	144.5	8.15037	656.798	-0.26951	IPSTPQSVGVNTRRSSQAGDIAAEKLVPKPP	_RSS(ph)QAGDIAAEK_	PAK_group;PKA_group	PAK1;PRKACA	0.23645	0.0481	1.34015					14-3-3 domain binding motif;ATM kinase substrate motif;Calmodulin-dependent protein kinase II substrate motif;DNA dependent Protein kinase substrate motif;MAPKAPK2 kinase substrate motif;MDC1 BRCT domain binding motif;PAK2 kinase substrate motif;PKA kinase substrate motif;PKC epsilon kinase substrate motif;PKC kinase substrate motif;Plk1 PBD domain binding motif
E7EWN3	91	E7EWN3	91	E7EWN3;Q9C0A6;C9JLA7	91;72;72	SET domain-containing protein 5	SETD5;SETD5;SETD5	S			0.164529	0.20063	0.203264	0.190046				1	2.55e-06	106.35	1	103.04	79.4064	746.838	-0.4638	PVQTIIPRSDLNGLPSPVEERCGDSPNSEGE	_SDLNGLPS(ph)PVEER_	MAPK3_MAPK1_MAPK7_NLK_group	MAPK3	0.1783	0.0593	1.4275					Casein kinase II substrate motif;DNA dependent Protein kinase substrate motif;ERK1,2 kinase substrate motif;GSK-3, ERK1, ERK2, CDK5 substrate motif;WW domain binding motif
E7EX17	359	E7EX17	359	E7EX17;P23588;B4DS13;F8VX11	359;359;320;314	Eukaryotic translation initiation factor 4B	EIF4B;EIF4B;EIF4B;EIF4B	S			0.111165	-0.481606	0.105142	0.105142	0.162339	0.0529723		0.452446	1.31e-07	128.32	1	119.31	111.615	806.398	0.71834	EDDSSASTSQSTRAASIFGGAKPVDTAARER	_AAS(ph)IFGGAKPVDTAAR_	CaMKII_group;CK1_group;p70S6K_group;PAK_group;RSK_group	CAMK2A;CAMK2D;CSNK1A1;PAK1;PAK2;RPS6KA1;RPS6KB1;RPS6KB2	0.1103	0.619	4.1569					14-3-3 domain binding motif;Calmodulin-dependent protein kinase II substrate motif;Phosphorylase kinase substrate motif;PKA kinase substrate motif;PKC kinase substrate motif
E7EX17	283	E7EX17	283	E7EX17;P23588;B4DS13;F8VX11;F8VP89	283;283;244;238;237	Eukaryotic translation initiation factor 4B	EIF4B;EIF4B;EIF4B;EIF4B;EIF4B	S			-0.134192	0.275841		-0.0356827		0.0529723		0.452446	0.00333375	88.136	0.999991	88.136	50.5778	419.168	0.71964	RGYDSRIGSGRRAFGSGYRRDDDYRGGGDRY	_AFGS(ph)GYR_	CaMKII_group;CK2_group;p70S6K_group;PAK_group;PKC_group;RSK_group	CAMK2D;CSNK2A1;PAK1;PAK2;PRKCA;PRKCB;PRKCZ;RPS6KA1;RPS6KB1	0.0811	0.4754	1.7907
E7EX17	207	E7EX17	207	E7EX17;P23588;B4DS13;F8VP89;F8VSC7;F8W0K0	207;207;168;207;207;161	Eukaryotic translation initiation factor 4B	EIF4B;EIF4B;EIF4B;EIF4B;EIF4B;EIF4B	S			-0.209411	0.337083		0.0677764	0.215616	0.0529723		0.452446	6.95e-23	148.44	0.999726	148.44	35.6236	844.359	1.1643	SDKTDTDWRARPATDSFDDYPPRRGDDSFGD	_ARPATDS(ph)FDDYPPR_	CaMKII_group;CK2_group;p70S6K_group;PAK_group;PDHK_group;PKB_group;RSK_group	AKT1;AKT2;AKT3;CAMK2D;CSNK2A1;CSNK2A2;PAK2;PDK1;RPS6KA1;RPS6KB1;RPS6KB2	0.0752	0.4754	2.5532					b-Adrenergic Receptor kinase substrate motif;Casein kinase II substrate motif;Pyruvate dehydrogenase kinase substrate motif
E7EX17	406	E7EX17	406	E7EX17;P23588;B4DS13	406;406;367	Eukaryotic translation initiation factor 4B	EIF4B;EIF4B;EIF4B	S			-0.0800117	0.151469	0.00532815	-0.0155929		0.0529723		0.452446	4.13e-35	193.06	1	193.06	89.1823	662.933	-0.36953	LDEPKLERRPRERHPSWRSEETQERERSRTG	_ERHPS(ph)WRS(ph)EETQER_	CaMKII_group;p70S6K_group;PAK_group;PKB_group;PKC_group;RSK_group	AKT1;AKT2;AKT3;CAMK2A;CAMK2D;PAK1;PAK2;PRKCA;PRKCB;RPS6KA1;RPS6KB1;RPS6KB2	0.1882	0.43215	1.97485					14-3-3 domain binding motif;Akt kinase substrate motif;Calmodulin-dependent protein kinase II substrate motif;Casein kinase I substrate motif;Casein kinase II substrate motif;DNA dependent Protein kinase substrate motif;MAPKAPK1 kinase substrate motif;PKA kinase substrate motif;PKC kinase substrate motif
E7EX17	409	E7EX17	409	E7EX17;P23588;B4DS13	409;409;370	Eukaryotic translation initiation factor 4B	EIF4B;EIF4B;EIF4B	S			-0.254548	-0.304612	-0.417656	-0.3361		0.0529723		0.452446	4.13e-35	193.06	0.999981	193.06	47.1813	662.933	-0.36953	PKLERRPRERHPSWRSEETQERERSRTGSES	_ERHPS(ph)WRS(ph)EETQER_	PDHK_group;RSK_group	PDK1;RPS6KA1	0.0431	0.63175	1.86035					Casein kinase I substrate motif;Casein kinase II substrate motif;G protein-coupled receptor kinase 1 substrate motif
E7EX17	219	E7EX17	219	E7EX17;P23588;B4DS13	219;219;180	Eukaryotic translation initiation factor 4B	EIF4B;EIF4B;EIF4B	S			0.604261			0.604261	-0.158027	0.0529723		0.452446	6.22e-07	86.641	0.999999	86.641	58.3587	698.288	0.13799	ATDSFDDYPPRRGDDSFGDKYRDRYDSDRYR	_RGDDS(ph)FGDKYR_	ACTR2_ACTR2B_TGFbR2_group;CaMKII_group;CK2_group;p70S6K_group;PAK_group;PKC_group;RSK_group	CAMK2D;CSNK2A1;CSNK2A2;PAK2;PRKCB;RPS6KA1;RPS6KB1;RPS6KB2;TGFBR2	0.0299	0.619	2.55					b-Adrenergic Receptor kinase substrate motif;Casein kinase II substrate motif;Pyruvate dehydrogenase kinase substrate motif
E7EX17	602	E7EX17	602	E7EX17;P23588;B4DS13	602;597;558	Eukaryotic translation initiation factor 4B	EIF4B;EIF4B;EIF4B	S								0.0529723		0.452446	4.98e-48	172.83	1	105.96	89.4707	1078.4	-0.97706	NPASKFSSASKYAALSVDGEDENEGEDYAE_	_YAALS(ph)VDGEDENEGEDYAE_	CaMKII_group;CK1_group;CK2_group;PAK_group;RSK_group	CAMK2A;CAMK2D;CSNK1A1;CSNK2A1;CSNK2A2;PAK2;RPS6KA1	0.1107	0.4754	2.5582
E7EX17	205	E7EX17	205	E7EX17;P23588;B4DS13;F8VP89;F8VSC7;F8W0K0	205;205;166;205;205;159	Eukaryotic translation initiation factor 4B	EIF4B;EIF4B;EIF4B;EIF4B;EIF4B;EIF4B	T			0.113167			0.113167	0.215616	0.0529723		0.452446	0.00597091	65.107	0.631603	65.107	2.34142	563.242	1.377	RDSDKTDTDWRARPATDSFDDYPPRRGDDSF	_ARPAT(ph)DSFDDYPPR_	CaMKII_group;p70S6K_group;PAK_group;PKB_group;RSK_group	AKT1;AKT2;AKT3;CAMK2D;PAK1;PAK2;RPS6KA1;RPS6KB1;RPS6KB2	0.149	0.619	1.3292					Akt kinase substrate motif;Calmodulin-dependent protein kinase II substrate motif;PKC kinase substrate motif
E7EXA6	261	E7EXA6	261	E7EXA6;Q8WVB6;F8WCC1	261;64;65	Chromosome transmission fidelity protein 18 homolog	CHTF18;CHTF18;CHTF18	S			0.283566	0.297367	0.462576	0.379954				1	4.03e-05	91.114	0.869619	84.933	8.24124	940.91	1.4756	PRTFEEALARGDAASSPAPAASVGSSQGGAR	_GDAASS(ph)PAPAASVGSSQGGAR_	MAPK3_MAPK1_MAPK7_NLK_group	MAPK3	0.1979	0.29	1.4864					ERK1,2 kinase substrate motif;G protein-coupled receptor kinase 1 substrate motif;GSK-3, ERK1, ERK2, CDK5 substrate motif;MDC1 BRCT domain binding motif;Plk1 PBD domain binding motif;WW domain binding motif
E7EXA6	1080	E7EXA6	1080	E7EXA6;Q8WVB6	1080;871	Chromosome transmission fidelity protein 18 homolog	CHTF18;CHTF18	S			-0.0504576	-0.114894	-0.0776804	-0.0749424				1	3.15e-10	125.74	1	124.8	67.2245	1215.08	-1.9837	AEASARVENSPQVDGSPPGLEGLLGGIGEKG	_VENSPQVDGS(ph)PPGLEGLLGGIGEK_	CDK2_CDK3_CDK1_CDK5_group;MAPK3_MAPK1_MAPK7_NLK_group	CDK1;CDK2;MAPK3	0.2229	0.416	1.3524					ERK1,2 kinase substrate motif;GSK-3, ERK1, ERK2, CDK5 substrate motif;WW domain binding motif
E9PAK5	7	E9PAK5	7	E9PAK5	7		DENND4B	S			-0.149649			-0.149649				1	4.7e-06	104.52	1	104.52	104.516	708.962	1.0168	_________MEADAVSEGGAMAEERPPRLVD	_(ac)MEADAVS(ph)EGGAMAEERPPR_	CK1_group	CSNK1A1	0.1274	0.0641	1.3564					Casein kinase I substrate motif;G protein-coupled receptor kinase 1 substrate motif
E9PAK5	964	E9PAK5	964	E9PAK5;O75064	964;953	DENN domain-containing protein 4B	DENND4B;DENND4B	S			0.249627	0.113834	0.220454	0.221073				1	0.0056499	59.709	0.999916	59.607	40.7786	616.793	0.080005	QRQTTWAGRSLRDPASPPGRLVKSGSLGSAR	_SLRDPAS(ph)PPGR_	CK1_group;MAPK3_MAPK1_MAPK7_NLK_group	CSNK1A1;MAPK1;MAPK3	0.2645	0.0449	1.6485					Casein kinase I substrate motif;ERK1,2 kinase substrate motif;GSK-3, ERK1, ERK2, CDK5 substrate motif;WW domain binding motif
E9PAK5	1103	E9PAK5	1103	E9PAK5;O75064	1103;1092	DENN domain-containing protein 4B	DENND4B;DENND4B	S					0.105678	0.105678				1	0.00880612	60.628	0.997549	60.628	26.096	624.776	-1.5748	PPPELPPDLPPPARRSPMDSLLHPRERPGST	_S(ph)PM(ox)DSLLHPR_	PAK_group	PAK1	0.0884	0.0403	1.0511					Casein kinase I substrate motif;Casein kinase II substrate motif;ERK1,2 kinase substrate motif;G protein-coupled receptor kinase 1 substrate motif;Growth associated histone HI kinase substrate motif;GSK3 kinase substrate motif;GSK-3, ERK1, ERK2, CDK5 substrate motif;PKA kinase substrate motif;PKC kinase substrate motif;Pyruvate dehydrogenase kinase substrate motif;WW domain binding motif
E9PAN7	28	E9PAN7	28	E9PAN7	28		RPS6KA1	S			0.347552	0.674641	0.266637	0.423309				1	0.000166393	92.932	0.671194	92.932	3.26351	879.433	0.23583	WALIPWLPRKQRPRISQTSLPVPGPGSGPQR	_IS(ph)QTSLPVPGPGSGPQR_	MAPK3_MAPK1_MAPK7_NLK_group;PAK_group;PDHK_group;PKA_group;RSK_group	MAPK1;MAPK3;MAPK7;PAK1;PDK1;PRKACA;RPS6KA1;RPS6KA3	0.0264	0.907	2.1665					ATM kinase substrate motif;Casein kinase I substrate motif;Casein kinase II substrate motif;DNA dependent Protein kinase substrate motif;PKA kinase substrate motif;PKC kinase substrate motif
E9PAU2	634	E9PAU2	634	E9PAU2;K7EKA4;K7EQG2	634;133;35		RAVER1	S			-0.0187172	-0.0535686	-0.0395476	-0.0408976		0.0216219		0.895548	7.2e-06	98.508	0.999994	98.508	52.3869	761.829	-0.60474	REPALGPHGPSRHKMSPPPSGFGERSSGGSG	_HKM(ox)S(ph)PPPSGFGER_	MAPK3_MAPK1_MAPK7_NLK_group	MAPK1;MAPK3	0.2694	0.2286	1.72515					Casein kinase I substrate motif;ERK1,2 kinase substrate motif;G protein-coupled receptor kinase 1 substrate motif;GSK3 kinase substrate motif;GSK-3, ERK1, ERK2, CDK5 substrate motif;PKA kinase substrate motif;PKC kinase substrate motif;WW domain binding motif
E9PAU2	584	E9PAU2	584	E9PAU2;K7EKA4	584;83		RAVER1	S	+		0.851119	0.735609	0.876487	0.850559		0.0216219		0.895548	7.82e-06	140.48	1	140.48	73.0979	512.265	0.53144	GSSSSKAFQLKSRLLSPLSSARLPPEPGLSD	_LLS(ph)PLSSAR_	MAPK3_MAPK1_MAPK7_NLK_group	MAPK1;MAPK3	0.2731	0.2286	1.7679					14-3-3 domain binding motif;Calmodulin-dependent protein kinase II substrate motif;Casein kinase I substrate motif;Casein kinase II substrate motif;ERK1,2 kinase substrate motif;G protein-coupled receptor kinase 1 substrate motif;GSK3 kinase substrate motif;GSK-3, ERK1, ERK2, CDK5 substrate motif;MAPKAPK1 kinase substrate motif;MAPKAPK2 kinase substrate motif;PKA kinase substrate motif;PKC kinase…
E9PAU2	588	E9PAU2	588	E9PAU2;K7EKA4	588;87		RAVER1	S			0.633571	0.386038	1.30153	0.633571		0.0216219		0.895548	0.00784875	65.395	0.600286	59.57	1.76801	512.265	-0.18611	SKAFQLKSRLLSPLSSARLPPEPGLSDSYSF	_LLSPLSS(ph)AR_	PKC_group	PRKCA;PRKCB	0.112	0.29815	1.02265					G protein-coupled receptor kinase 1 substrate motif;MAPKAPK2 kinase substrate motif;MDC1 BRCT domain binding motif;PKA kinase substrate motif;PKC kinase substrate motif;Plk1 PBD domain binding motif
E9PAU2	600	E9PAU2	600	E9PAU2;K7EKA4	600;99		RAVER1	S			-0.665592			-0.665592		0.0216219		0.895548	8.54e-06	98.019	0.92012	98.019	13.7007	1254.03	1.0183	PLSSARLPPEPGLSDSYSFDYPSDMGPRRLF	_LPPEPGLSDS(ph)YSFDYPSDMGPR_	PAK_group	PAK1	0.0896	0.175	1.058					b-Adrenergic Receptor kinase substrate motif;Casein kinase II substrate motif
E9PAU2	480	E9PAU2;Q8IY67	480;463	E9PAU2;Q8IY67	480;463	Ribonucleoprotein PTB-binding 1	RAVER1;RAVER1	T			0.404576	0.304628	0.184979	0.346418		0.0427695		0.81072	1.09e-15	130.78	1	33.835	33.8347	1102.08	-0.95055	GDREALGLGPPAAQLTPPPAPVGLRGSGLRG	_EALGLGPPAAQ(de)LT(ph)PPPAPVGLR_	MAPK3_MAPK1_MAPK7_NLK_group	MAPK1;MAPK3	0.3171	0.2286	1.8269					G protein-coupled receptor kinase 1 substrate motif;GSK-3, ERK1, ERK2, CDK5 substrate motif;RAF1 kinase substrate motif;WW domain binding motif
E9PAV3	2029	E9PAV3	2029	E9PAV3;Q13765;H0YHX9;F8VZJ2;F8W0W4	2029;166;164;87;166	Nascent polypeptide-associated complex subunit alpha	NACA;NACA;NACA;NACA;NACA	S			-0.0540777	0.0204844		-0.0134507		-0.0764173		0.440023	5.19e-79	223.1	0.999999	223.1	64.3484	1314.25	0.59465	SNIQENTQTPTVQEESEEEEVDETGVEVKDI	_VQGEAVSNIQENTQTPTVQEES(ph)EEEEVDETGVEVK_										b-Adrenergic Receptor kinase substrate motif;BARD1 BRCT domain binding motif;Casein kinase II substrate motif;G protein-coupled receptor kinase 1 substrate motif
E9PAV3	2022	E9PAV3	2022	E9PAV3;Q13765;H0YHX9;F8VZJ2;F8W0W4	2022;159;157;80;159	Nascent polypeptide-associated complex subunit alpha	NACA;NACA;NACA;NACA;NACA	T								-0.0764173		0.440023	2.71e-11	83.559	0.308073	83.559	0	1314.25	1.4666	KVQGEAVSNIQENTQTPTVQEESEEEEVDET	_VQGEAVSNIQENTQT(ph)PTVQEESEEEEVDETGVEVK_										GSK-3, ERK1, ERK2, CDK5 substrate motif;WW domain binding motif
E9PAV3	2024	E9PAV3	2024	E9PAV3;Q13765;H0YHX9;F8VZJ2;F8W0W4	2024;161;159;82;161	Nascent polypeptide-associated complex subunit alpha	NACA;NACA;NACA;NACA;NACA	T								-0.0764173		0.440023	2.71e-11	83.559	0.473619	53.408	0	985.939	-0.23988	QGEAVSNIQENTQTPTVQEESEEEEVDETGV	_VQGEAVSNIQENTQTPT(ph)VQEESEEEEVDETGVEVK_	CK1_group	CSNK1A1	0.1294	0.1777	1.3564					Casein kinase II substrate motif;DNA dependent Protein kinase substrate motif
E9PB38	416	E9PB38	416	E9PB38;Q86VP3;F8VW41;G8JLK3	416;416;386;341	Phosphofurin acidic cluster sorting protein 2	PACS2;PACS2;PACS2;PACS2	S			-0.395397	-0.363921	-0.272506	-0.363921				1	0.000876704	84.718	0.994101	72.496	22.2737	591.792	0.64052	FTERLPPSGRITKTESLVIPSTRSEGKQAGR	_TES(ph)LVIPSTR_	PAK_group;PKC_group	PAK1;PRKCB	0.1291	0.16495	1.263					b-Adrenergic Receptor kinase substrate motif;Calmodulin-dependent protein kinase II substrate motif;Chk1 kinase substrate motif;G protein-coupled receptor kinase 1 substrate motif;Phosphorylase kinase substrate motif;PKA kinase substrate motif;PKC kinase substrate motif
E9PB61	15	E9PB61	15	E9PB61;Q86V81	15;8	THO complex subunit 4	ALYREF;ALYREF	S	+		0.998123	0.744506	0.894216	0.90512	-0.00834846	0.0254541		0.702619	5.81e-17	152.71	1	38.799	38.799	638.764	1.1238	_MPDSAPAMADKMDMSLDDIIKLNRSQRGGR	_M(ox)DMS(ph)LDDIIK_										Casein kinase II substrate motif;PKA kinase substrate motif;Plk1 kinase substrate motif;Pyruvate dehydrogenase kinase substrate motif
E9PBB4	282	B5MCU0;E9PBB4	283;282	B5MCU0;H7C0E9;Q9UBL0;E9PBB4;Q15032;G5E9G8;E9PG42;H7C2F9	283;34;280;282;282;238;226;265	cAMP-regulated phosphoprotein 21;R3H domain-containing protein 1	R3HDM2;R3HDM2;ARPP21;R3HDM1;R3HDM1;R3HDM1;R3HDM1;R3HDM1	S			0.145743	0.436588	0.158078	0.158078				1	1.85e-08	119.54	0.999164	119.54	30.7761	588.26	-0.10285	DNQIRVPLQDGRRSKSIEEREEEYQRVRERI;DNQMRIRLKDDRRSKSIEEREEEYQRARDRI	_SKS(ph)IEEREEEYQR_	CaMKII_group;CK1_group;PAK_group	CAMK2A;CSNK1A1;PAK1	0.1614	0.0787	1.3015					14-3-3 domain binding motif;14-3-3 domain binding motif;Calmodulin-dependent protein kinase II substrate motif;Calmodulin-dependent protein kinase II substrate motif;Casein kinase II substrate motif;Casein kinase II substrate motif;MAPKAPK2 kinase substrate motif;Phosphorylase kinase substrate motif;Phosphorylase kinase substrate motif;PKA kinase substrate motif;PKA kinase substrate motif;PKC kin…
E9PBB4	381	E9PBB4	381	E9PBB4;Q15032;G5E9G8;E9PG42;H7C207;H7BZ47;H7C1X4	381;381;337;325;70;50;73	R3H domain-containing protein 1	R3HDM1;R3HDM1;R3HDM1;R3HDM1;R3HDM1;R3HDM1;R3HDM1	S			0.0490731	1.16922	1.20044	0.305679				1	1.09e-09	124.62	0.999207	124.62	32.6313	652.816	0.19091	DSSLRNLKPAVTKASSFSGISVLTRGDSSGS	_ASS(ph)FSGISVLTR_	PAK_group;PKC_group	PAK1;PRKCA;PRKCB	0.1941	0.0838	1.1889					Calmodulin-dependent protein kinase II substrate motif;Casein kinase II substrate motif;Chk1 kinase substrate motif;MDC1 BRCT domain binding motif;PKA kinase substrate motif;PKC kinase substrate motif;Plk1 PBD domain binding motif
E9PBB4	262	E9PBB4	262	E9PBB4;Q15032;G5E9G8;E9PG42;H7C2F9	262;262;218;206;245	R3H domain-containing protein 1	R3HDM1;R3HDM1;R3HDM1;R3HDM1;R3HDM1	S			0.423202		-0.818783	-0.197799				1	2.97e-12	144.18	0.999115	144.18	30.5287	826.306	-1.1192	GEDFQKRYILKRDNSSFDKDDNQMRIRLKDD	_DNSS(ph)FDKDDNQMR_	PKC_group	PRKCA;PRKCB	0.18	0.1047	1.29405					Casein kinase I substrate motif;MDC1 BRCT domain binding motif;Plk1 PBD domain binding motif
E9PBB4	974	E9PBB4	974	E9PBB4;Q15032;G5E9G8;E9PG42;H7C207	974;973;845;918;697	R3H domain-containing protein 1	R3HDM1;R3HDM1;R3HDM1;R3HDM1;R3HDM1	S			-0.355848	0.922274	-0.380972	0.922274				1	7.7e-11	134.68	0.750653	134.68	4.78635	792.387	-0.0018274	SRHGNRGRRQAKKAASTDLGAGETVVGKVLE	_KAAS(ph)TDLGAGETVVGK_	CaMKII_group;PAK_group	CAMK2A;PAK1	0.1008	0.10835	1.25885					PKA kinase substrate motif;PKC kinase substrate motif
E9PCG2	5	E9PCG2	5	E9PCG2;Q9BSG1;B4DIR4	5;5;5	Zinc finger protein 2	ZNF2;ZNF2;ZNF2	S			-1.70003	-0.165402		-0.932719				1	0.00391328	75.197	0.989908	75.197	22.4716	462.713	-0.8781	___________MAAVSPTTRCQESVTFEDVA	_(ac)AAVS(ph)PTTR_										Casein kinase I substrate motif;Casein kinase II substrate motif;ERK1,2 kinase substrate motif;GSK-3, ERK1, ERK2, CDK5 substrate motif;WW domain binding motif
E9PCH4	1544	E9PCH4	1544	E9PCH4;Q8TEU7	1544;1494	Rap guanine nucleotide exchange factor 6	FNIP1;RAPGEF6	S			1.06088	1.28729		1.17409				1	6.7e-07	129.77	0.958022	129.77	13.5836	658.82	-0.23883	VTSSTEKGLIVYCVTSPKKDDRYREPPPTPP	_GLIVYCVTS(ph)PK_	CaMKIV	CAMK4	0.0158	0.597	1.2353					Cdc2 kinase substrate motif;CDK kinase substrate motif;CDK1,2,4,6 kinase substrate motif;ERK1,2 kinase substrate motif;Growth associated histone HI kinase substrate motif;GSK-3, ERK1, ERK2, CDK5 substrate motif;PKA kinase substrate motif;PKC kinase substrate motif;WW domain binding motif
E9PCH4	280	E9PCH4	280	E9PCH4;Q8TEU7;B7Z7Y1;D6RB02;D6RIH0;D6RD23	280;230;230;58;83;83	Rap guanine nucleotide exchange factor 6	FNIP1;RAPGEF6;RAPGEF6;RAPGEF6;RAPGEF6;RAPGEF6	S			-0.157576	-0.499932		-0.328761				1	2.39e-06	87.749	0.999981	87.749	47.2867	1055.44	-0.32949	VGDVDLTRLPEGPVDSEDDEEEDEEIDRTDP	_LPEGPVDS(ph)EDDEEEDEEIDRTDPLQGR_	CaMKIV	CAMK4	0.0211	0.597	3.9375					b-Adrenergic Receptor kinase substrate motif;Casein kinase II substrate motif;G protein-coupled receptor kinase 1 substrate motif;Pyruvate dehydrogenase kinase substrate motif
E9PCH4	1144	E9PCH4	1144	E9PCH4;Q8TEU7;B7Z7Y1;D6RE77	1144;1094;1094;817	Rap guanine nucleotide exchange factor 6	FNIP1;RAPGEF6;RAPGEF6;RAPGEF6	S			0.0699771	-0.420163	0.0250289	0.00805655				1	0.000830279	98.105	0.964262	86.463	14.3106	484.75	0.12956	LDVQGGAHKKRARRSSLLNAKKLYEDAQMAR	_RSS(ph)LLNAK_	CaMKII_group;CaMKIV;PAK_group;PKA_group;PKC_group	CAMK2A;CAMK4;PAK1;PRKACA;PRKCA;PRKCB	0.1783	0.4115	1.50855					14-3-3 domain binding motif;Akt kinase substrate motif;Aurora-A kinase substrate motif;Calmodulin-dependent protein kinase II substrate motif;DMPK1 kinase substrate motif;G protein-coupled receptor kinase 1 substrate motif;MAPKAPK1 kinase substrate motif;MDC1 BRCT domain binding motif;p70 Ribosomal S6 kinase substrate motif;PAK2 kinase substrate motif;Phosphorylase kinase substrate motif;PKA kina…
E9PCH4	1207	E9PCH4	1207	E9PCH4;Q8TEU7;B7Z7Y1;D6RE77	1207;1157;1157;880	Rap guanine nucleotide exchange factor 6	FNIP1;RAPGEF6;RAPGEF6;RAPGEF6	S			0.209765	0.278936	0.423955	0.214498				1	0.00126804	78.903	0.99988	78.903	42.2241	616.738	-0.46028	TKNLSEKRSAKSSEMSPVPMRSAGQTTKAHL	_SSEM(ox)S(ph)PVPM(ox)R_	MAPK3_MAPK1_MAPK7_NLK_group	MAPK3	0.2198	0.3962	1.9994					ERK1,2 kinase substrate motif;GSK-3, ERK1, ERK2, CDK5 substrate motif;MAPKAPK2 kinase substrate motif;WW domain binding motif
E9PCR4	778	E9PCR4	778	E9PCR4;Q9UJX5	778;777	Anaphase-promoting complex subunit 4	ANAPC4;ANAPC4	S			-0.00610107	-0.135776	0.287709	-0.00610106				1	3.59e-42	186.88	0.952915	186.88	13.0617	1006.51	0.26232	EEASNKPVKIKEEVLSESEAENQQAGAAALA	_IKEEVLS(ph)ESEAENQQAGAAALAPEIVIK_	AuroraA;NEK1_NEK5_NEK3_NEK4_NEK11_NEK2_group	AURKA;NEK2	0.0193	0.899	4.05835					Casein kinase I substrate motif;Casein kinase II substrate motif;G protein-coupled receptor kinase 1 substrate motif
E9PCR4	780	E9PCR4	780	E9PCR4;Q9UJX5	780;779	Anaphase-promoting complex subunit 4	ANAPC4;ANAPC4	S				-0.0216286	-0.107461	-0.0645553				1	2.25e-14	118.3	0.617317	118.3	2.0767	1006.51	0.51639	ASNKPVKIKEEVLSESEAENQQAGAAALAPE	_IKEEVLSES(ph)EAENQQAGAAALAPEIVIK_	AuroraA;NEK1_NEK5_NEK3_NEK4_NEK11_NEK2_group	AURKA;NEK2	0.0209	0.899	4.05945					b-Adrenergic Receptor kinase substrate motif;Casein kinase II substrate motif;G protein-coupled receptor kinase 1 substrate motif
E9PCT1	750	E9PCT1	750	E9PCT1;A9Z1X7;Q8IYB3	750;747;738	Serine/arginine repetitive matrix protein 1	SRRM1;SRRM1;SRRM1	S			0.0139266	-0.0733781	-0.00079366	-0.0489494		0.216734		0.253049	5.74e-22	190.34	1	96.773	96.7732	684.262	-0.15179	RVSRTPEPKKIKKAASPSPQSVRRVSSSRSV	_KAAS(ph)PS(ph)PQS(ph)VR_	CLK_group;MAPK3_MAPK1_MAPK7_NLK_group	CLK1;MAPK3	0.25175	0.32375	1.26925					Calmodulin-dependent protein kinase II substrate motif;Casein kinase II substrate motif;Chk1 kinase substrate motif;ERK1,2 kinase substrate motif;GSK-3, ERK1, ERK2, CDK5 substrate motif;PKA kinase substrate motif;PKC kinase substrate motif;WW domain binding motif
E9PCT1	752	E9PCT1	752	E9PCT1;A9Z1X7;Q8IYB3	752;749;740	Serine/arginine repetitive matrix protein 1	SRRM1;SRRM1;SRRM1	S			0.124725	0.177982	0.194717	0.167615		0.216734		0.253049	8.12e-16	162.79	1	96.773	96.7732	684.262	-0.15179	SRTPEPKKIKKAASPSPQSVRRVSSSRSVSG	_KAAS(ph)PS(ph)PQS(ph)VR_										Casein kinase I substrate motif;Casein kinase II substrate motif;DNA dependent Protein kinase substrate motif;ERK1,2 kinase substrate motif;GSK-3, ERK1, ERK2, CDK5 substrate motif;WW domain binding motif
E9PCT1	755	E9PCT1	755	E9PCT1;A9Z1X7;Q8IYB3	755;752;743	Serine/arginine repetitive matrix protein 1	SRRM1;SRRM1;SRRM1	S			-0.0215847	0.0988237	0.175301	0.0988238		0.216734		0.253049	5.07e-05	100.77	1	96.773	96.7732	684.262	-0.15179	PEPKKIKKAASPSPQSVRRVSSSRSVSGSPE	_KAAS(ph)PS(ph)PQS(ph)VR_	PKC_group	PRKCA;PRKCB;PRKCZ	0.4642	0.2725	2.4948					PKA kinase substrate motif;PKC kinase substrate motif
E9PCT1	706	E9PCT1	706	E9PCT1;A9Z1X7;Q8IYB3;M0R088	706;703;694;667	Serine/arginine repetitive matrix protein 1	SRRM1;SRRM1;SRRM1	S			-0.0216433	-0.00911769	-0.0471894	-0.0426054		0.216734		0.253049	1.79e-13	149	0.993423	137.61	22.9723	692.289	-0.015273	NKRHSPSPRPRAPQTSSSPPPVRRGASSSPQ	_APQTS(ph)S(ph)SPPPVR_	PAK_group	PAK1	0.1603	0.2084	1.2989					Casein kinase II substrate motif;G protein-coupled receptor kinase 1 substrate motif
E9PCT1	707	E9PCT1	707	E9PCT1;A9Z1X7;Q8IYB3;M0R088	707;704;695;668	Serine/arginine repetitive matrix protein 1	SRRM1;SRRM1;SRRM1	S			-0.111695	0.188148	0.0578315	0.0578315		0.216734		0.253049	1.21e-39	176.89	0.928219	70.281	11.0194	692.289	0.17099	KRHSPSPRPRAPQTSSSPPPVRRGASSSPQR	_APQTSS(ph)S(ph)PPPVR_	PAK_group	PAK1	0.1258	0.2084	1.2678					G protein-coupled receptor kinase 1 substrate motif;MDC1 BRCT domain binding motif;Plk1 PBD domain binding motif
E9PCT1	708	E9PCT1	708	E9PCT1;A9Z1X7;Q8IYB3;M0R088	708;705;696;669	Serine/arginine repetitive matrix protein 1	SRRM1;SRRM1;SRRM1	S			0.0226164	0.119423	0.00748262	0.0173518		0.216734		0.253049	2.28e-53	236.3	0.997715	144.08	26.5545	730.356	-1.2113	RHSPSPRPRAPQTSSSPPPVRRGASSSPQRR	_APQTSSS(ph)PPPVRR_	MAPK3_MAPK1_MAPK7_NLK_group	MAPK3	0.2119	0.2281	1.5552					ERK1,2 kinase substrate motif;GSK-3, ERK1, ERK2, CDK5 substrate motif;MDC1 BRCT domain binding motif;Plk1 PBD domain binding motif;WW domain binding motif
E9PCT1	402	E9PCT1	402	E9PCT1;A9Z1X7;Q8IYB3;M0R088	402;397;402;363	Serine/arginine repetitive matrix protein 1	SRRM1;SRRM1;SRRM1	S			-0.114113	-0.0567013	-0.0622639	-0.0662159		0.216734		0.253049	2.12e-10	142.35	1	41.088	41.0881	721.323	-0.23193	RLSPSASPPRRRHRPSPPATPPPKTRHSPTP	_HRPS(ph)PPAT(ph)PPPK_	CLK_group;MAPK3_MAPK1_MAPK7_NLK_group;PAK_group	CLK1;MAPK3;PAK1	0.214	0.2281	1.2929					Casein kinase I substrate motif;DNA dependent Protein kinase substrate motif;ERK1,2 kinase substrate motif;G protein-coupled receptor kinase 1 substrate motif;GSK-3, ERK1, ERK2, CDK5 substrate motif;PKA kinase substrate motif;PKC kinase substrate motif;WW domain binding motif
E9PCT1	886	E9PCT1	886	E9PCT1;A9Z1X7;Q8IYB3	886;883;874	Serine/arginine repetitive matrix protein 1	SRRM1;SRRM1;SRRM1	S			-0.0284841	0.0163537	-0.0812016	-0.028484		0.216734		0.253049	0	459.62	1	99.366	99.3661	811.007	-0.49172	QEEPVAAPEPKKETESEAEDNLDDLEKHLRE	_KET(ph)ES(ph)EAEDNLDDLEKHLR_										b-Adrenergic Receptor kinase substrate motif;Casein kinase I substrate motif;Casein kinase II substrate motif;G protein-coupled receptor kinase 1 substrate motif;PKA kinase substrate motif
E9PCT1	781	E9PCT1	781	E9PCT1;A9Z1X7;Q8IYB3	781;778;769	Serine/arginine repetitive matrix protein 1	SRRM1;SRRM1;SRRM1	S			-0.168577	-0.157818	-0.0779087	-0.145925		0.216734		0.253049	4.42e-09	107	0.999215	86.507	28.05	718.602	-1.0274	SGSPEPAAKKPPAPPSPVQSQSPSTNWSPAV	_KPPAPPS(ph)PVQS(ph)QSPSTNWSPAVPVKK_	MAPK3_MAPK1_MAPK7_NLK_group	MAPK1;MAPK3	0.2303	0.3094	1.37					Casein kinase I substrate motif;DNA dependent Protein kinase substrate motif;ERK1,2 kinase substrate motif;G protein-coupled receptor kinase 1 substrate motif;GSK3 kinase substrate motif;GSK-3, ERK1, ERK2, CDK5 substrate motif;WW domain binding motif
E9PCT1	785	E9PCT1	785	E9PCT1;A9Z1X7;Q8IYB3	785;782;773	Serine/arginine repetitive matrix protein 1	SRRM1;SRRM1;SRRM1	S			-0.0657628	-0.128598	0.12618	-0.128598		0.216734		0.253049	2.8e-06	86.507	0.765917	62.302	5.35495	957.8	-0.81479	EPAAKKPPAPPSPVQSQSPSTNWSPAVPVKK	_KPPAPPS(ph)PVQS(ph)QSPSTNWSPAVPVKK_	ATM_ATR_group;PAK_group	ATM;PAK1	0.22345	0.32725	1.95875					ATM kinase substrate motif;Casein kinase II substrate motif;DNA dependent Protein kinase substrate motif;G protein-coupled receptor kinase 1 substrate motif;GSK3 kinase substrate motif;MAPKAPK2 kinase substrate motif
E9PCT1	787	E9PCT1	787	E9PCT1;A9Z1X7;Q8IYB3	787;784;775	Serine/arginine repetitive matrix protein 1	SRRM1;SRRM1;SRRM1	S			-0.186836	-0.185064	-0.109405	-0.148129		0.216734		0.253049	4.42e-09	107	0.874849	77.825	8.30246	957.8	-1.0822	AAKKPPAPPSPVQSQSPSTNWSPAVPVKKAK	_KPPAPPS(ph)PVQSQS(ph)PSTNWSPAVPVKK_	MAPK3_MAPK1_MAPK7_NLK_group	MAPK3	0.1662	0.2281	1.4139					Casein kinase I substrate motif;Casein kinase II substrate motif;ERK1,2 kinase substrate motif;GSK-3, ERK1, ERK2, CDK5 substrate motif;WW domain binding motif
E9PCT1	789	E9PCT1	789	E9PCT1;A9Z1X7;Q8IYB3	789;786;777	Serine/arginine repetitive matrix protein 1	SRRM1;SRRM1;SRRM1	S								0.216734		0.253049	0.00746982	44.317	0.387275	44.317	0.29565	984.455	0.048063	KKPPAPPSPVQSQSPSTNWSPAVPVKKAKSP	_KPPAPPS(ph)PVQSQS(ph)PS(ph)TNWSPAVPVKK_										DNA dependent Protein kinase substrate motif;G protein-coupled receptor kinase 1 substrate motif;GSK3 kinase substrate motif;MAPKAPK2 kinase substrate motif
E9PCT1	429	E9PCT1	429	E9PCT1;A9Z1X7;Q8IYB3;M0R088	429;424;429;390	Serine/arginine repetitive matrix protein 1	SRRM1;SRRM1;SRRM1	S			-0.0936635	-0.0778174	-0.0975636	-0.0932325		0.216734		0.253049	3.35e-05	125.53	1	83	82.9999	431.167	-0.15517	SPTPQQSNRTRKSRVSVSPGRTSVTKHKGTE	_VS(ph)VS(ph)PGR_	CLK_group;PAK_group;PKC_group	CLK1;PAK1;PRKCB	0.1907	0.2725	1.0186					Casein kinase II substrate motif;PKA kinase substrate motif;PKC kinase substrate motif
E9PCT1	431	E9PCT1	431	E9PCT1;A9Z1X7;Q8IYB3;M0R088	431;426;431;392	Serine/arginine repetitive matrix protein 1	SRRM1;SRRM1;SRRM1	S			-0.0936635	-0.0772846	-0.0960208	-0.0890525		0.216734		0.253049	3.35e-05	125.53	1	83	82.9999	431.167	-0.15517	TPQQSNRTRKSRVSVSPGRTSVTKHKGTEKR	_VS(ph)VS(ph)PGR_	CLK_group	CLK1	0.2968	0.4194	1.1292					Casein kinase I substrate motif;Cdc2 kinase substrate motif;CDK kinase substrate motif;CDK1,2,4,6 kinase substrate motif;ERK1,2 kinase substrate motif;G protein-coupled receptor kinase 1 substrate motif;GSK-3, ERK1, ERK2, CDK5 substrate motif;WW domain binding motif
E9PCT1	461	E9PCT1	461	E9PCT1;A9Z1X7;Q8IYB3;M0R088	461;458;463;422	Serine/arginine repetitive matrix protein 1	SRRM1;SRRM1;SRRM1	S			-0.0658987	-0.111399	-0.152789	-0.11591		0.216734		0.253049	3.62e-85	272.64	1	193.06	193.063	565.569	-0.10961	RESPSPAPKPRKVELSESEEDKGGKMAAADS	_KVELS(ph)ES(ph)EEDKGGK_										Casein kinase II substrate motif;G protein-coupled receptor kinase 1 substrate motif;PKA kinase substrate motif
E9PCT1	463	E9PCT1	463	E9PCT1;A9Z1X7;Q8IYB3;M0R088	463;460;465;424	Serine/arginine repetitive matrix protein 1	SRRM1;SRRM1;SRRM1	S			0.0432045	-0.171515	-0.158107	-0.140317		0.216734		0.253049	3.62e-85	272.64	1	193.06	193.063	565.569	-0.10961	SPSPAPKPRKVELSESEEDKGGKMAAADSVQ	_KVELS(ph)ES(ph)EEDKGGK_										b-Adrenergic Receptor kinase substrate motif;Casein kinase II substrate motif;G protein-coupled receptor kinase 1 substrate motif;Pyruvate dehydrogenase kinase substrate motif
E9PCT1	448	E9PCT1	448	E9PCT1;A9Z1X7;Q8IYB3;M0R088	448;445;450;409	Serine/arginine repetitive matrix protein 1	SRRM1;SRRM1;SRRM1	S			-0.0108901	-0.10967	-0.0951113	-0.0602619		0.216734		0.253049	5.24e-08	141	1	38.808	38.8083	461.206	-0.2379	GRTSVTKHKGTEKRESPSPAPKPRKVELSES	_RES(ph)PS(ph)PAPKPR_	MAPK3_MAPK1_MAPK7_NLK_group	MAPK1;MAPK3	0.2817	0.3094	1.9251					b-Adrenergic Receptor kinase substrate motif;Casein kinase II substrate motif;ERK1,2 kinase substrate motif;G protein-coupled receptor kinase 1 substrate motif;GSK-3, ERK1, ERK2, CDK5 substrate motif;PAK2 kinase substrate motif;PKA kinase substrate motif;PKC kinase substrate motif;WW domain binding motif
E9PCT1	450	E9PCT1	450	E9PCT1;A9Z1X7;Q8IYB3;M0R088	450;447;452;411	Serine/arginine repetitive matrix protein 1	SRRM1;SRRM1;SRRM1	S			0.239642	-0.0993399	-0.333425	-0.00714458		0.216734		0.253049	0.0046282	57.973	1	38.808	38.8083	461.206	-0.2379	TSVTKHKGTEKRESPSPAPKPRKVELSESEE	_RES(ph)PS(ph)PAPKPR_	CLK_group;MAPK3_MAPK1_MAPK7_NLK_group	CLK1;MAPK1;MAPK3	0.2728	0.3907	1.7579					Casein kinase I substrate motif;DNA dependent Protein kinase substrate motif;ERK1,2 kinase substrate motif;GSK-3, ERK1, ERK2, CDK5 substrate motif;WW domain binding motif
E9PCT1	389	E9PCT1	389	E9PCT1;A9Z1X7;Q8IYB3;M0R088	389;384;389;350	Serine/arginine repetitive matrix protein 1	SRRM1;SRRM1;SRRM1	S			0.1133	0.0754641	0.0918014	0.0918014		0.216734		0.253049	1.22e-19	185.66	1	130.47	130.468	654.251	0.59061	PPKRTSSPPRKTRRLSPSASPPRRRHRPSPP	_RLS(ph)PS(ph)AS(ph)PPR_	CLK_group;MAPK3_MAPK1_MAPK7_NLK_group;PAK_group	CLK1;MAPK1;MAPK3;PAK1	0.2928	0.3094	1.5598					14-3-3 domain binding motif;Calmodulin-dependent protein kinase II substrate motif;Casein kinase I substrate motif;Casein kinase II substrate motif;ERK1,2 kinase substrate motif;G protein-coupled receptor kinase 1 substrate motif;GSK3 kinase substrate motif;GSK-3, ERK1, ERK2, CDK5 substrate motif;MAPKAPK1 kinase substrate motif;PAK2 kinase substrate motif;PKA kinase substrate motif;PKC epsilon ki…
E9PCT1	391	E9PCT1	391	E9PCT1;A9Z1X7;Q8IYB3;M0R088	391;386;391;352	Serine/arginine repetitive matrix protein 1	SRRM1;SRRM1;SRRM1	S			0.160662	0.153676	0.0067647	0.00676478		0.216734		0.253049	3.93e-09	149.35	1	130.47	130.468	654.251	0.59061	KRTSSPPRKTRRLSPSASPPRRRHRPSPPAT	_RLS(ph)PS(ph)AS(ph)PPR_	PAK_group	PAK1	0.1507	0.2084	1.2961					Casein kinase II substrate motif;DNA dependent Protein kinase substrate motif;G protein-coupled receptor kinase 1 substrate motif
E9PCT1	393	E9PCT1	393	E9PCT1;A9Z1X7;Q8IYB3;M0R088	393;388;393;354	Serine/arginine repetitive matrix protein 1	SRRM1;SRRM1;SRRM1	S			0.116365	0.0230425	0.0984196	0.0836559		0.216734		0.253049	1.22e-19	185.66	1	130.47	130.468	654.251	0.59061	TSSPPRKTRRLSPSASPPRRRHRPSPPATPP	_RLS(ph)PS(ph)AS(ph)PPR_	CLK_group;MAPK3_MAPK1_MAPK7_NLK_group	CLK1;MAPK3	0.25715	0.32375	1.3249					Cdc2 kinase substrate motif;CDK kinase substrate motif;CDK1,2,4,6 kinase substrate motif;ERK1,2 kinase substrate motif;GSK-3, ERK1, ERK2, CDK5 substrate motif;MAPKAPK2 kinase substrate motif;WW domain binding motif
E9PCT1	725	E9PCT1	725	E9PCT1;A9Z1X7;Q8IYB3	725;722;713	Serine/arginine repetitive matrix protein 1	SRRM1;SRRM1;SRRM1	S			-0.0536434	-0.0934788	0.0413831	-0.0573466		0.216734		0.253049	7e-11	144.08	1	138.91	74.6954	514.571	-0.041744	PPVRRGASSSPQRRQSPSPSTRPIRRVSRTP	_RQS(ph)PS(ph)PSTRPIR_	CLK_group;MAPK3_MAPK1_MAPK7_NLK_group;PAK_group	CLK1;MAPK3;PAK1	0.1816	0.2281	1.3617					14-3-3 domain binding motif;Calmodulin-dependent protein kinase II substrate motif;Casein kinase I substrate motif;Casein kinase II substrate motif;ERK1,2 kinase substrate motif;G protein-coupled receptor kinase 1 substrate motif;GSK3 kinase substrate motif;GSK-3, ERK1, ERK2, CDK5 substrate motif;PAK2 kinase substrate motif;PKA kinase substrate motif;PKC epsilon kinase substrate motif;PKC kinase …
E9PCT1	727	E9PCT1	727	E9PCT1;A9Z1X7;Q8IYB3	727;724;715	Serine/arginine repetitive matrix protein 1	SRRM1;SRRM1;SRRM1	S			-0.00242579	0.0425042	0.037593	0.0343566		0.216734		0.253049	1.31e-10	140.8	0.999958	96.993	46.9135	514.571	-0.62791	VRRGASSSPQRRQSPSPSTRPIRRVSRTPEP	_RQS(ph)PS(ph)PSTRPIR_	CLK_group;MAPK3_MAPK1_MAPK7_NLK_group	CLK1;MAPK3	0.28535	0.32375	1.3489					Casein kinase I substrate motif;Casein kinase II substrate motif;DNA dependent Protein kinase substrate motif;ERK1,2 kinase substrate motif;GSK-3, ERK1, ERK2, CDK5 substrate motif;WW domain binding motif
E9PCT1	729	E9PCT1	729	E9PCT1;A9Z1X7;Q8IYB3	729;726;717	Serine/arginine repetitive matrix protein 1	SRRM1;SRRM1;SRRM1	S			0.0521377	0.0150693		0.0521376		0.216734		0.253049	7e-11	144.08	0.81997	137.3	8.3059	771.353	-0.12499	RGASSSPQRRQSPSPSTRPIRRVSRTPEPKK	_RQS(ph)PSPS(ph)TRPIR_	PKC_group	PRKCA;PRKCB;PRKCZ	0.3281	0.2725	1.6684					DNA dependent Protein kinase substrate motif;MAPKAPK2 kinase substrate motif;PKA kinase substrate motif;PKC kinase substrate motif
E9PCT1	572	E9PCT1	572	E9PCT1;A9Z1X7;Q8IYB3;M0R088	572;569;560;533	Serine/arginine repetitive matrix protein 1	SRRM1;SRRM1;SRRM1	S			0.054779	0.0359054	0.0688772	0.054779		0.216734		0.253049	4.65e-07	128.71	1	50.102	50.1018	611.262	-0.09425	RRRRSPSPPPTRRRRSPSPAPPPRRRRTPTP	_S(ph)PS(ph)PAPPPRR_	CLK_group;MAPK3_MAPK1_MAPK7_NLK_group;PAK_group	CLK1;MAPK1;MAPK3;PAK1	0.2764	0.3094	1.5598					14-3-3 domain binding motif;Calmodulin-dependent protein kinase II substrate motif;Casein kinase II substrate motif;ERK1,2 kinase substrate motif;G protein-coupled receptor kinase 1 substrate motif;Growth associated histone HI kinase substrate motif;GSK-3, ERK1, ERK2, CDK5 substrate motif;MAPKAPK1 kinase substrate motif;PAK2 kinase substrate motif;Pim1 kinase substrate sequence;PKA kinase substra…
E9PCT1	574	E9PCT1	574	E9PCT1;A9Z1X7;Q8IYB3;M0R088	574;571;562;535	Serine/arginine repetitive matrix protein 1	SRRM1;SRRM1;SRRM1	S			0.054779	0.0359054	0.0688772	0.054779		0.216734		0.253049	4.65e-07	128.71	1	50.102	50.1018	611.262	-0.09425	RRSPSPPPTRRRRSPSPAPPPRRRRTPTPPP	_S(ph)PS(ph)PAPPPRR_	CLK_group;MAPK3_MAPK1_MAPK7_NLK_group;PAK_group;PKB_group	AKT1;AKT2;CLK1;MAPK1;MAPK3;PAK1	0.29455	0.40505	1.2207					14-3-3 domain binding motif;Akt kinase substrate motif;Calmodulin-dependent protein kinase II substrate motif;DNA dependent Protein kinase substrate motif;ERK1,2 kinase substrate motif;G protein-coupled receptor kinase 1 substrate motif;GSK-3, ERK1, ERK2, CDK5 substrate motif;MAPKAPK1 kinase substrate motif;PKA kinase substrate motif;PKC kinase substrate motif;WW domain binding motif;ZIP kinase s…
E9PCT1	628	E9PCT1	628	E9PCT1;A9Z1X7;Q8IYB3;M0R088	628;625;616;589	Serine/arginine repetitive matrix protein 1	SRRM1;SRRM1;SRRM1	S			0.200379	0.0662615	0.0439044	0.116099		0.216734		0.253049	5.96e-10	120.96	1	100.55	100.552	403.181	-0.49322	QRRYSPSPPPKRRTASPPPPPKRRASPSPPP	_T(ph)AS(ph)PPPPPKR_	CLK_group;MAPK3_MAPK1_MAPK7_NLK_group;PAK_group	CLK1;MAPK1;MAPK3;PAK1	0.2985	0.3094	1.448					14-3-3 domain binding motif;Akt kinase substrate motif;Calmodulin-dependent protein kinase II substrate motif;ERK1,2 kinase substrate motif;G protein-coupled receptor kinase 1 substrate motif;GSK-3, ERK1, ERK2, CDK5 substrate motif;MAPKAPK1 kinase substrate motif;PKA kinase substrate motif;PKC kinase substrate motif;WW domain binding motif;ZIP kinase substrate motif
E9PCT1	595	E9PCT1	595	E9PCT1;A9Z1X7;Q8IYB3;M0R088	595;592;583;556	Serine/arginine repetitive matrix protein 1	SRRM1;SRRM1;SRRM1	S			0.0159258	-0.0217458	-0.0264108	-0.0219362		0.216734		0.253049	0.000215279	118.76	1	42.209	42.2093	408.52	-0.73598	RRRRTPTPPPRRRTPSPPPRRRSPSPRRYSP	_RRT(ph)PS(ph)PPPR_	CLK_group;MAPK3_MAPK1_MAPK7_NLK_group;PAK_group;PKB_group	AKT1;AKT2;CLK1;MAPK1;MAPK3;PAK1	0.28345	0.40505	1.18605					14-3-3 domain binding motif;Akt kinase substrate motif;AMP-activated protein kinase 2 substrate motif;Calmodulin-dependent protein kinase II substrate motif;DNA dependent Protein kinase substrate motif;ERK1,2 kinase substrate motif;GSK-3, ERK1, ERK2, CDK5 substrate motif;MAPKAPK1 kinase substrate motif;PKA kinase substrate motif;PKC kinase substrate motif;WW domain binding motif;ZIP kinase substr…
E9PCT1	550	E9PCT1	550	E9PCT1;A9Z1X7;M0R088	550;547;511		SRRM1;SRRM1	S			-0.0273074	-0.074517	0.0458623	-0.0273073		0.216734		0.253049	0.000162258	130.23	0.999968	121.64	44.9597	463.213	0.61261	QKETSPRMQMGKRWQSPVTKSGRRRRSPSPP	_WQS(ph)PVTK_										14-3-3 domain binding motif;Calmodulin-dependent protein kinase II substrate motif;Casein kinase I substrate motif;Casein kinase II substrate motif;ERK1,2 kinase substrate motif;GSK-3, ERK1, ERK2, CDK5 substrate motif;PKA kinase substrate motif;PKC kinase substrate motif;WW domain binding motif
E9PCT1	609	E9PCT1	609	E9PCT1;A9Z1X7;Q8IYB3;M0R088	609;606;597;570	Serine/arginine repetitive matrix protein 1	SRRM1;SRRM1;SRRM1	S			0.0467006	0.0480967	0.717298	0.0467006		0.216734		0.253049	3.33e-06	155.33	1	152.64	99.7717	548.769	-0.098919	PSPPPRRRSPSPRRYSPPIQRRYSPSPPPKR	_RYS(ph)PPIQR_	CLK_group;PAK_group;PKA_group	CLK1;PAK1;PRKACA	0.2462	0.2793	1.3023					14-3-3 domain binding motif;Calmodulin-dependent protein kinase II substrate motif;ERK1,2 kinase substrate motif;GSK-3, ERK1, ERK2, CDK5 substrate motif;PAK2 kinase substrate motif;PKA kinase substrate motif;PKC epsilon kinase substrate motif;PKC kinase substrate motif;WW domain binding motif
E9PCT1	617	E9PCT1	617	E9PCT1;A9Z1X7;Q8IYB3;M0R088	617;614;605;578	Serine/arginine repetitive matrix protein 1	SRRM1;SRRM1;SRRM1	S			-0.018235	0.0103502	0.0257376	0.0100637		0.216734		0.253049	0.000153704	107.11	0.999997	84.169	54.6249	396.833	0.34158	SPSPRRYSPPIQRRYSPSPPPKRRTASPPPP	_RYS(ph)PS(ph)PPPK_	CLK_group;MAPK3_MAPK1_MAPK7_NLK_group;PAK_group	CLK1;MAPK1;MAPK3;PAK1	0.2602	0.3094	1.5531					14-3-3 domain binding motif;Calmodulin-dependent protein kinase II substrate motif;Calmodulin-dependent protein kinase IV substrate motif;Casein kinase II substrate motif;Chk1 kinase substrate motif;ERK1,2 kinase substrate motif;G protein-coupled receptor kinase 1 substrate motif;GSK-3, ERK1, ERK2, CDK5 substrate motif;PAK2 kinase substrate motif;PKA kinase substrate motif;PKC epsilon kinase subs…
E9PCT1	619	E9PCT1	619	E9PCT1;A9Z1X7;Q8IYB3;M0R088	619;616;607;580	Serine/arginine repetitive matrix protein 1	SRRM1;SRRM1;SRRM1	S			-0.018235	0.0103502	0.0257376	0.0100637		0.216734		0.253049	0.000153704	107.11	1	107.11	78.3157	594.746	0.026173	SPRRYSPPIQRRYSPSPPPKRRTASPPPPPK	_RYS(ph)PS(ph)PPPK_	CLK_group;MAPK3_MAPK1_MAPK7_NLK_group	CLK1;MAPK1;MAPK3	0.2668	0.3907	1.7579					DNA dependent Protein kinase substrate motif;ERK1,2 kinase substrate motif;GSK-3, ERK1, ERK2, CDK5 substrate motif;WW domain binding motif
E9PCT1	260	E9PCT1	260	E9PCT1;A9Z1X7;Q8IYB3;M0R088;B4DED5	260;260;260;221;129	Serine/arginine repetitive matrix protein 1	SRRM1;SRRM1;SRRM1;SRRM1	S			-0.132483	-0.103782	-0.0428283	-0.122727		0.216734		0.253049	6.28e-43	209.71	1	114.04	114.035	660.003	0.18264	LKVPKPEPIPEPKEPSPEKNSKKEKEKEKTR	_VPKPEPIPEPKEPS(ph)PEK_										Casein kinase II substrate motif;Cdc2 kinase substrate motif;CDK kinase substrate motif;CDK1,2,4,6 kinase substrate motif;DNA dependent Protein kinase substrate motif;ERK1,2 kinase substrate motif;GSK-3, ERK1, ERK2, CDK5 substrate motif;PKA kinase substrate motif;PKC kinase substrate motif;WW domain binding motif
E9PCT1	436	E9PCT1	436	E9PCT1;M0R088	436;397		SRRM1	S								0.216734		0.253049	0.000132414	101.04	0.499707	101.04	0	689.312	1.109	NRTRKSRVSVSPGRTSVTKHKGTEKRESPSP	_VSVS(ph)PGRT(ph)SVTK_	PAK_group;PKA_group;PKC_group	PAK1;PRKACA;PRKCA;PRKCB	0.1942	0.2759	1.31015					Casein kinase II substrate motif;PKA kinase substrate motif;PKC kinase substrate motif
E9PCT1	705	E9PCT1	705	E9PCT1;A9Z1X7;Q8IYB3;M0R088	705;702;693;666	Serine/arginine repetitive matrix protein 1	SRRM1;SRRM1;SRRM1	T			0.0404014	-0.104837	0.0275787	-0.104837		0.216734		0.253049	4.87e-07	125.22	0.840513	125.22	7.01227	692.289	0.14591	PNKRHSPSPRPRAPQTSSSPPPVRRGASSSP	_APQT(ph)SSS(ph)PPPVR_	PAK_group	PAK1	0.1006	0.2084	1.1218					Casein kinase I substrate motif;Casein kinase II substrate motif;G protein-coupled receptor kinase 1 substrate motif
E9PCT1	858	E9PCT1	858	E9PCT1;A9Z1X7;Q8IYB3	858;855;846	Serine/arginine repetitive matrix protein 1	SRRM1;SRRM1;SRRM1	T								0.216734		0.253049	0.000471065	40.837	0.25	40.837	0	1065.88	5.8657	HKKEKAVAAAAAAAVTPAAIAAATTTLAQEE	_AVAAAAAAAVT(ph)PAAIAAATTTLAQ(de)EEPVAAPEPK_										GSK-3, ERK1, ERK2, CDK5 substrate motif;WW domain binding motif
E9PCT1	866	E9PCT1	866	E9PCT1;A9Z1X7;Q8IYB3	866;863;854	Serine/arginine repetitive matrix protein 1	SRRM1;SRRM1;SRRM1	T								0.216734		0.253049	0.000471065	40.837	0.25	40.837	0	1065.88	5.8657	AAAAAAVTPAAIAAATTTLAQEEPVAAPEPK	_AVAAAAAAAVT(ph)PAAIAAATTTLAQ(de)EEPVAAPEPK_										G protein-coupled receptor kinase 1 substrate motif
E9PCT1	867	E9PCT1	867	E9PCT1;A9Z1X7;Q8IYB3	867;864;855	Serine/arginine repetitive matrix protein 1	SRRM1;SRRM1;SRRM1	T								0.216734		0.253049	0.000471065	40.837	0.25	40.837	0	1065.88	5.8657	AAAAAVTPAAIAAATTTLAQEEPVAAPEPKK	_AVAAAAAAAVT(ph)PAAIAAATTTLAQ(de)EEPVAAPEPK_
E9PCT1	868	E9PCT1	868	E9PCT1;A9Z1X7;Q8IYB3	868;865;856	Serine/arginine repetitive matrix protein 1	SRRM1;SRRM1;SRRM1	T								0.216734		0.253049	0.000471065	40.837	0.25	40.837	0	1065.88	5.8657	AAAAVTPAAIAAATTTLAQEEPVAAPEPKKE	_AVAAAAAAAVT(ph)PAAIAAATTTLAQ(de)EEPVAAPEPK_
E9PCT1	220	E9PCT1	220	E9PCT1;A9Z1X7;Q8IYB3;M0R088;B4DED5	220;220;220;181;89	Serine/arginine repetitive matrix protein 1	SRRM1;SRRM1;SRRM1;SRRM1	T			-0.0536584	-0.0694216	-0.079539	-0.0666238		0.216734		0.253049	3.65e-57	234.12	1	142.12	102.722	588.781	-0.15045	TKSRSPSPAPEKKEKTPELPEPSVKVKEPSV	_T(ph)PELPEPSVK_										G protein-coupled receptor kinase 1 substrate motif;Growth associated histone HI kinase substrate motif;GSK-3, ERK1, ERK2, CDK5 substrate motif;PKA kinase substrate motif;PKC kinase substrate motif;WW domain binding motif
E9PCT1	406	E9PCT1	406	E9PCT1;A9Z1X7;Q8IYB3;M0R088	406;401;406;367	Serine/arginine repetitive matrix protein 1	SRRM1;SRRM1;SRRM1	T			-0.114113	-0.0567013	-0.0622639	-0.0662159		0.216734		0.253049	2.12e-10	142.35	1	41.088	41.0881	721.323	-0.23193	SASPPRRRHRPSPPATPPPKTRHSPTPQQSN	_HRPS(ph)PPAT(ph)PPPK_	MAPK3_MAPK1_MAPK7_NLK_group	MAPK1;MAPK3	0.3183	0.3094	1.9251					ERK1,2 kinase substrate motif;GSK3, Erk1, Erk2 and CDK5 kinase motif;GSK-3, ERK1, ERK2, CDK5 substrate motif;MAPKAPK2 kinase substrate motif;WW domain binding motif
E9PCT1	884	E9PCT1	884	E9PCT1;A9Z1X7;Q8IYB3	884;881;872	Serine/arginine repetitive matrix protein 1	SRRM1;SRRM1;SRRM1	T			-0.139172	0.289598	-0.205929	-0.018425		0.216734		0.253049	5.93e-204	371.49	1	99.366	99.3661	811.007	-0.49172	LAQEEPVAAPEPKKETESEAEDNLDDLEKHL	_KET(ph)ES(ph)EAEDNLDDLEKHLR_										b-Adrenergic Receptor kinase substrate motif;Casein kinase II substrate motif;G protein-coupled receptor kinase 1 substrate motif;PKA kinase substrate motif;PKC kinase substrate motif
E9PCT1	626	E9PCT1	626	E9PCT1;A9Z1X7;Q8IYB3;M0R088	626;623;614;587	Serine/arginine repetitive matrix protein 1	SRRM1;SRRM1;SRRM1	T			-0.146292	-0.24284	-0.212902	-0.212902		0.216734		0.253049	2.17e-05	116.98	1	100.55	100.552	403.181	-0.49322	PIQRRYSPSPPPKRRTASPPPPPKRRASPSP	_T(ph)AS(ph)PPPPPKR_	CLK_group;MAPK3_MAPK1_MAPK7_NLK_group;PAK_group	CLK1;MAPK3;PAK1	0.1881	0.2281	1.3617					G protein-coupled receptor kinase 1 substrate motif;PAK2 kinase substrate motif;PKA kinase substrate motif;PKC kinase substrate motif
E9PCT1	593	E9PCT1	593	E9PCT1;A9Z1X7;Q8IYB3;M0R088	593;590;581;554	Serine/arginine repetitive matrix protein 1	SRRM1;SRRM1;SRRM1	T			0.0159258	-0.0217458	-0.0264108	-0.0219362		0.216734		0.253049	0.000215279	118.76	1	42.209	42.2093	408.52	-0.73598	PPRRRRTPTPPPRRRTPSPPPRRRSPSPRRY	_RRT(ph)PS(ph)PPPR_	CLK_group;MAPK3_MAPK1_MAPK7_NLK_group;PAK_group	CLK1;MAPK1;MAPK3;PAK1	0.2901	0.3094	1.5285					Calmodulin-dependent protein kinase II substrate motif;G protein-coupled receptor kinase 1 substrate motif;Growth associated histone HI kinase substrate motif;GSK-3, ERK1, ERK2, CDK5 substrate motif;PAK2 kinase substrate motif;PKA kinase substrate motif;PKC kinase substrate motif;WW domain binding motif
E9PCT1	584	E9PCT1	584	E9PCT1;A9Z1X7;Q8IYB3;M0R088	584;581;572;545	Serine/arginine repetitive matrix protein 1	SRRM1;SRRM1;SRRM1	T			0.0361869	-0.00511617	-0.012228	0.0154976		0.216734		0.253049	0.000136284	135.5	1	69.602	69.6016	413.192	-0.69854	RRRSPSPAPPPRRRRTPTPPPRRRTPSPPPR	_RRT(ph)PT(ph)PPPR_	CLK_group;MAPK3_MAPK1_MAPK7_NLK_group;PAK_group	CLK1;MAPK1;MAPK3;PAK1	0.2533	0.3094	1.4609					Calmodulin-dependent protein kinase II substrate motif;G protein-coupled receptor kinase 1 substrate motif;Growth associated histone HI kinase substrate motif;GSK-3, ERK1, ERK2, CDK5 substrate motif;PAK2 kinase substrate motif;Pim1 kinase substrate sequence;PKA kinase substrate motif;PKC kinase substrate motif;WW domain binding motif
E9PCT1	586	E9PCT1	586	E9PCT1;A9Z1X7;Q8IYB3;M0R088	586;583;574;547	Serine/arginine repetitive matrix protein 1	SRRM1;SRRM1;SRRM1	T			0.0361869	-0.00511617	-0.012228	0.0154976		0.216734		0.253049	0.000136284	135.5	1	69.602	69.6016	413.192	-0.69854	RSPSPAPPPRRRRTPTPPPRRRTPSPPPRRR	_RRT(ph)PT(ph)PPPR_	CLK_group;MAPK3_MAPK1_MAPK7_NLK_group;PKB_group	AKT1;AKT2;CLK1;MAPK1;MAPK3	0.3277	0.4194	1.1576					Akt kinase substrate motif;Calmodulin-dependent protein kinase II substrate motif;DNA dependent Protein kinase substrate motif;GSK-3, ERK1, ERK2, CDK5 substrate motif;PKC kinase substrate motif;WW domain binding motif
E9PCT1	435	E9PCT1	435	E9PCT1;M0R088	435;396		SRRM1	T			1.0345			1.0345		0.216734		0.253049	0.000132414	101.04	0.692315	82.837	3.51948	689.312	1.1104	SNRTRKSRVSVSPGRTSVTKHKGTEKRESPS	_VSVS(ph)PGRT(ph)SVTK_										Casein kinase I substrate motif;MAPKAPK2 kinase substrate motif
E9PCW1	49	E9PCW1	49	E9PCW1;B4DQA8	49;49	Golgi SNAP receptor complex member 1	GOSR1;GOSR1	S			0.399882	0.0626743	0.0522768	0.0886844				1	1.34e-22	166.35	0.995547	84.762	23.5399	964.921	-1.2489	CTSYSHSSTRDGRRDSSDTTPLLNGSSQDRM	_RDS(ph)SDTTPLLNGSSQDR_	CaMKII_group;PAK_group;PKA_group	CAMK2A;PAK1;PRKACA	0.1867	0.14	1.3617					14-3-3 domain binding motif;b-Adrenergic Receptor kinase substrate motif;Calmodulin-dependent protein kinase II substrate motif;Casein kinase I substrate motif;Casein kinase II substrate motif;G protein-coupled receptor kinase 1 substrate motif;MAPKAPK2 kinase substrate motif;PAK2 kinase substrate motif;PKA kinase substrate motif;PKC epsilon kinase substrate motif;PKC kinase substrate motif
E9PCW1	50	E9PCW1	50	E9PCW1;B4DQA8	50;50	Golgi SNAP receptor complex member 1	GOSR1;GOSR1	S			0.11023		0.0626743	0.086512				1	1.22e-05	98.281	0.553758	66.793	1.01752	753.328	1.2015	TSYSHSSTRDGRRDSSDTTPLLNGSSQDRMF	_DGRRDSS(ph)DTTPLLN(de)GSSQDR_										14-3-3 domain binding motif;Calmodulin-dependent protein kinase II substrate motif;Casein kinase I substrate motif;Casein kinase II substrate motif;G protein-coupled receptor kinase 1 substrate motif;MDC1 BRCT domain binding motif;PKA kinase substrate motif;PKC kinase substrate motif;Plk1 PBD domain binding motif;ZIP kinase substrate motif
E9PCW1	52	E9PCW1	52	E9PCW1;B4DQA8	52;52	Golgi SNAP receptor complex member 1	GOSR1;GOSR1	T										1	3.04e-05	99.451	0.303057	99.451	0	643.616	0.83465	YSHSSTRDGRRDSSDTTPLLNGSSQDRMFET	_RDSSDT(ph)TPLLNGSSQDR_	CK1_group	CSNK1A1	0.1158	0.1416	1.3372					b-Adrenergic Receptor kinase substrate motif
E9PCW1	53	E9PCW1	53	E9PCW1;B4DQA8	53;53	Golgi SNAP receptor complex member 1	GOSR1;GOSR1	T										1	3.04e-05	99.451	0.303057	99.451	0	643.616	0.83465	SHSSTRDGRRDSSDTTPLLNGSSQDRMFETM	_RDSSDT(ph)TPLLNGSSQDR_	CK1_group	CSNK1A1	0.1273	0.1416	1.3564					GSK-3, ERK1, ERK2, CDK5 substrate motif;MAPKAPK2 kinase substrate motif;WW domain binding motif
E9PD98	904	E9PD98	904	E9PD98;Q15811;F8W7U0;CON__ENSEMBL:ENSBTAP00000001528	904;904;904;906	Intersectin-1	ITSN1;ITSN1;ITSN1	S			-0.0234311	-0.0752312	-0.0661555	-0.0447914				1	2.43e-08	124.17	0.966453	90.097	15.3488	1085.51	-1.2147	QRSAFTPATATGSSPSPVLGQGEKVEGLQAQ	_SAFTPATATGSSPS(ph)PVLGQGEK_	CDK2_CDK3_CDK1_CDK5_group;CK1_group	CDK5;CSNK1A1	0.15225	0.32505	1.215					DNA dependent Protein kinase substrate motif;ERK1,2 kinase substrate motif;GSK-3, ERK1, ERK2, CDK5 substrate motif;WW domain binding motif
E9PD98	313	E9PD98	313	E9PD98;Q15811;F8W7U0;C9JQZ7	313;313;313;253	Intersectin-1	ITSN1;ITSN1;ITSN1;ITSN1	S										1	1.27e-05	102.33	0.499701	102.33	0	830.383	1.4434	VLPPEYIPPSFRRVRSGSGISVISSTSVDQR	_S(ph)GSGISVISSTSVDQR_	CaMKII_group;PAK_group;SGK_group	CAMK2A;PAK1;SGK1	0.1309	0.4166	1.6494					14-3-3 domain binding motif;AMP-activated protein kinase substrate motif;Calmodulin-dependent protein kinase I substrate motif;Calmodulin-dependent protein kinase II substrate motif;Calmodulin-dependent protein kinase IV substrate motif;Casein kinase II substrate motif;PKA kinase substrate motif;PKC kinase substrate motif;ZIP kinase substrate motif
E9PD98	315	E9PD98	315	E9PD98;Q15811;F8W7U0;C9JQZ7	315;315;315;255	Intersectin-1	ITSN1;ITSN1;ITSN1;ITSN1	S										1	1.27e-05	102.33	0.499701	102.33	0	830.383	1.4434	PPEYIPPSFRRVRSGSGISVISSTSVDQRLP	_S(ph)GSGISVISSTSVDQR_	CaMKII_group;PAK_group;PKB_group	AKT1;AKT2;AKT3;CAMK2A;PAK1	0.3558	0.3942	1.1559					14-3-3 domain binding motif;Akt kinase substrate motif;AMP-activated protein kinase substrate motif;Calmodulin-dependent protein kinase II substrate motif;Casein kinase I substrate motif;Casein kinase II substrate motif;HMGCoA Reductase kinase substrate motif;MAPKAPK1 kinase substrate motif;PKA kinase substrate motif;PKC kinase substrate motif
E9PEB9	77	E9PEB9	77	E9PEB9;Q5T0V7	77;77		DST;DST	S			-0.0844867		0.0889556	0.00230647		0.00662125		0.897458	0.000411547	98.156	0.999988	98.156	49.1754	543.74	0.082076	AVLRSHHFRSEGFRASPRHLRRRVAAAAAAR	_SEGFRAS(ph)PR_	CDK2_CDK3_CDK1_CDK5_group;PKC_group	CDK1;CDK5;PRKCA;PRKCB	0.24715	0.41455	1.35215					ERK1,2 kinase substrate motif;Growth associated histone HI kinase substrate motif;GSK-3, ERK1, ERK2, CDK5 substrate motif;NIMA kinase substrate motif;PKA kinase substrate motif;PKC kinase substrate motif;WW domain binding motif
E9PER1	94	E9PER1	94	E9PER1;Q14689	94;94	Disco-interacting protein 2 homolog A	DIP2A;DIP2A	S			-0.156273	0.040682	0.306845	0.0367495				1	5.81e-05	99.603	0.998521	99.603	28.2943	608.3	0.84228	QQKSRPTASRDERFRSDVHTEAVQAALAKYK	_FRS(ph)DVHTEAVQAALAK_	CaMKII_group	CAMK2A	0.1268	0.1418	1.5789					14-3-3 domain binding motif;Calmodulin-dependent protein kinase II substrate motif;G protein-coupled receptor kinase 1 substrate motif;MAPKAPK2 kinase substrate motif;PKA kinase substrate motif;PKC kinase substrate motif
E9PF93	463	E9PF93	463	E9PF93;Q16281	463;459	Cyclic nucleotide-gated cation channel alpha-3	CNGA3;CNGA3	S			-0.163316	-0.547953	-0.181297	-0.181297				1	0.0131443	53.252	1	53.252	53.2519	554.786	0.28333	LWANKKTVDEKEVLKSLPDKLKAEIAINVHL	_EVLKS(ph)LPDK_	CK1_group;PKC_group	CSNK1A1;PRKCA;PRKCB	0.1664	0.2205	1.0288					Casein kinase II substrate motif;Pyruvate dehydrogenase kinase substrate motif
E9PF99	1755	E9PF99	1755	E9PF99;K7ENP4;C9JT09;Q8TEP8;H0Y966;K7EPA2	1755;1294;1280;1159;1355;303	Centrosomal protein of 192 kDa	CEP192;CEP192;CEP192;CEP192	S			-0.120514			-0.120514				1	5.14e-05	77.733	0.800213	77.733	7.06654	911.457	-0.83823	VVLKGEVISSGSKPLSPGPCLDIPSILSNKQ	_GEVISSGSKPLS(ph)PGPCLDIPSILSNK_	AuroraA;CDK2_CDK3_CDK1_CDK5_group;CK1_group;MAPK3_MAPK1_MAPK7_NLK_group;NEK1_NEK5_NEK3_NEK4_NEK11_NEK2_group	AURKA;CDK1;CDK5;CSNK1D;CSNK1E;MAPK1;MAPK3;NEK2	0.13155	0.899	2.71975					ERK1,2 kinase substrate motif;GSK-3, ERK1, ERK2, CDK5 substrate motif;MAPKAPK2 kinase substrate motif;PKA kinase substrate motif;PKC kinase substrate motif;WW domain binding motif
E9PFC7	753	E9PFC7	753	E9PFC7;P38398;E9PFZ0;E7EP70;E7EMP0;F8W8H7	753;753;706;457;753;753	Breast cancer type 1 susceptibility protein	BRCA1;BRCA1;BRCA1;BRCA1;BRCA1;BRCA1	S			-1.56281		-1.29516	-1.54549				1	5.19e-08	107.74	1	107.74	98.6446	977.932	1.8489	VKVSNNAEDPKDLMLSGERVLQTERSVESSS	_VSNNAEDPKDLMLS(ph)GER_	ATM_ATR_group;AuroraA;CDK7;CK2_group;DNAPK;PKC_group	ATM;ATR;AURKA;CDK7;CSNK2A1;HYRC;PRKCA;PRKCB	0.1194	0.777	3.66665					Casein kinase II substrate motif
E9PFC7	1663	E9PFC7	1663	E9PFC7;P38398;E9PFZ0;E7EP70;G3XAC3;E7EUM2;B7ZA85;H0Y8B8;K7EPC7	1663;1642;1595;1346;459;538;492;413;133	Breast cancer type 1 susceptibility protein	BRCA1;BRCA1;BRCA1;BRCA1;BRCA1;BRCA1;BRCA1;BRCA1	S										1	6.18e-06	115.04	0.798963	112.02	6.03068	670.808	0.83783	AMEESVSREKPELTASTERVNKRMSMVVSGL	_EKPELTAS(ph)TER_	AuroraA;CaMKIV;CDK7;CK1_group;CK2_group;DNAPK;HIPK1_HIPK2_group;PDHK_group;PKC_group;TTK	AURKA;CAMK4;CDK7;CSNK1D;CSNK2A1;HIPK2;HYRC;PDK1;PRKCA;PRKCB;TTK	0.0653	0.4015	1.649					Casein kinase II substrate motif
E9PFC7	1545	E9PFC7	1545	E9PFC7;P38398;E9PFZ0;E7EP70;G3XAC3;E7EUM2;B7ZA85;H0Y8B8;K7EPC7	1545;1524;1477;1228;341;420;374;295;15	Breast cancer type 1 susceptibility protein	BRCA1;BRCA1;BRCA1;BRCA1;BRCA1;BRCA1;BRCA1;BRCA1	S			-0.0854814	-0.164933	0.0350608	0.0184917				1	0.000839373	85.522	0.999806	59.116	38.3282	651.287	-2.101	YMHSCSGSLQNRNYPSQEELIKVVDVEEQQL	_NYPS(ph)Q(de)EELIK_	ATM_ATR_group;AuroraA;CDK7;CK2_group;DNAPK	ATM;ATR;AURKA;CDK7;CSNK2A1;HYRC	0.1729	0.9435	7.45075					ATM kinase substrate motif;Casein kinase II substrate motif;DNA dependent Protein kinase substrate motif
E9PFC7	1517	E9PFC7	1517	E9PFC7;P38398;E9PFZ0;E7EP70;G3XAC3;E7EUM2;B7ZA85;H0Y8B8	1517;1496;1449;1200;313;392;346;267	Breast cancer type 1 susceptibility protein	BRCA1;BRCA1;BRCA1;BRCA1;BRCA1;BRCA1;BRCA1;BRCA1	S										1	0.000306263	82.362	0.499638	82.362	0	476.866	-0.12347	ADSSTSKNKEPGVERSSPSKCPSLDDRWYMH	_S(ph)SPSKCPSLDDR_	AuroraA;CaMKIV;CDK7;DNAPK	AURKA;CAMK4;CDK7;HYRC	0.0217	0.777	4.79645					Casein kinase I substrate motif;Casein kinase II substrate motif
E9PFC7	1518	E9PFC7	1518	E9PFC7;P38398;E9PFZ0;E7EP70;G3XAC3;E7EUM2;B7ZA85;H0Y8B8	1518;1497;1450;1201;314;393;347;268	Breast cancer type 1 susceptibility protein	BRCA1;BRCA1;BRCA1;BRCA1;BRCA1;BRCA1;BRCA1;BRCA1	S				0.219339		0.219339				1	0.000306263	82.362	0.52492	79.013	0.778877	754.778	-0.19366	DSSTSKNKEPGVERSSPSKCPSLDDRWYMHS	_SS(ph)PSKCPS(ph)LDDR_	AuroraA;CDK2_CDK3_CDK1_CDK5_group;CDK7;DNAPK;MAPK3_MAPK1_MAPK7_NLK_group	AURKA;CDK1;CDK2;CDK3;CDK5;CDK7;HYRC;MAPK3	0.2548	0.7145	4.3786					Casein kinase I substrate motif;Casein kinase II substrate motif;Cdc2 kinase substrate motif;CDK kinase substrate motif;CDK1,2,4,6 kinase substrate motif;ERK1,2 kinase substrate motif;Growth associated histone HI kinase substrate motif;GSK-3, ERK1, ERK2, CDK5 substrate motif;MDC1 BRCT domain binding motif;PKA kinase substrate motif;PKC kinase substrate motif;Plk1 PBD domain binding motif;WW domai…
E9PFC7	1524	E9PFC7	1524	E9PFC7;P38398;E9PFZ0;E7EP70;G3XAC3;E7EUM2;B7ZA85;H0Y8B8	1524;1503;1456;1207;320;399;353;274	Breast cancer type 1 susceptibility protein	BRCA1;BRCA1;BRCA1;BRCA1;BRCA1;BRCA1;BRCA1;BRCA1	S				0.219339		0.219339				1	0.000470561	79.013	0.999994	79.013	52.4654	754.778	-0.19366	NKEPGVERSSPSKCPSLDDRWYMHSCSGSLQ	_SS(ph)PSKCPS(ph)LDDR_	AuroraA;CaMKII_group;CDK7;CK2_group;DNAPK;HIPK1_HIPK2_group;PKC_group	AURKA;CAMK2A;CDK7;CSNK2A1;HIPK2;HYRC;PRKCA;PRKCB	0.08345	0.48135	2.3915					Casein kinase II substrate motif;DNA dependent Protein kinase substrate motif;MAPKAPK2 kinase substrate motif;Phosphorylase kinase substrate motif;PKA kinase substrate motif;PKC kinase substrate motif;Pyruvate dehydrogenase kinase substrate motif
E9PFC7	1563	E9PFC7	1563	E9PFC7;P38398;E9PFZ0;E7EP70;G3XAC3;E7EUM2;B7ZA85;H0Y8B8;K7EPC7	1563;1542;1495;1246;359;438;392;313;33	Breast cancer type 1 susceptibility protein	BRCA1;BRCA1;BRCA1;BRCA1;BRCA1;BRCA1;BRCA1;BRCA1	S			-0.295234	-0.241731		-0.268487				1	2.96e-28	166.03	0.999945	166.03	43.3443	984.117	-0.018716	ELIKVVDVEEQQLEESGPHDLTETSYLPRQD	_VVDVEEQQLEES(ph)GPHDLTETSYLPR_	AuroraA;CaMKIV;CDK7;CK1_group;CK2_group;DNAPK	AURKA;CAMK4;CDK7;CSNK1D;CSNK2A1;HYRC	0.0226	0.6105	3.6968					b-Adrenergic Receptor kinase substrate motif
E9PFN4	19	E9PFN4	19	E9PFN4	19		SLC4A7	S			0.0560286	0.497434	-0.146947	0.0881416				1	1.06e-23	176.48	0.999673	129.32	34.8581	584.612	-1.564	DGAGEQMRPLLTRVTSRGPDEEAVVDLGKTS	_VTS(ph)RGPDEEAVVDLGK_	CaMKII_group;PAK_group	CAMK2A;PAK1	0.1662	0.19245	1.60225					14-3-3 domain binding motif;Calmodulin-dependent protein kinase II substrate motif;Calmodulin-dependent protein kinase IV substrate motif;Chk1 kinase substrate motif;PKA kinase substrate motif;PKC kinase substrate motif
E9PFW3	181	E9PFW3	181	E9PFW3;Q96CW1	181;156	AP-2 complex subunit mu	AP2M1;AP2M1	T			-0.280422	-0.23472		-0.23472				1	9.51e-07	127.01	0.967507	111.49	14.7707	1013.97	-0.48627	QHQTKEEQSQITSQVTGQIGWRREGIKYRRN	_EEQSQITSQVT(ph)GQIGWR_	CK1_group;RSK_group	CSNK1A1;RPS6KA1;RPS6KA3	0.0247	0.899	1.4694
E9PGD0	814	E9PGD0	814	E9PGD0;F5GXJ4;H0Y860;Q9P246	814;806;727;719	Stromal interaction molecule 2	STIM2;STIM2;STIM2;STIM2	S			-0.104093	0.677711	0.0261627	0.0261627				1	4.19e-14	125.52	0.998397	125.52	27.9438	563.243	0.18191	DSKPVQEAPSVARISSIPHDLCHNGEKSKKP	_ISS(ph)IPHDLCHN(de)GEK_	PAK_group	PAK1	0.1726	0.1286	1.3024					14-3-3 domain binding motif;Calmodulin-dependent protein kinase II alpha substrate motif;Calmodulin-dependent protein kinase II substrate motif;Calmodulin-dependent protein kinase IV substrate motif;Chk1 kinase substrate motif;MDC1 BRCT domain binding motif;Phosphorylase kinase substrate motif;PKA kinase substrate motif;PKC kinase substrate motif;Plk1 PBD domain binding motif
E9PGD0	618	E9PGD0	618	E9PGD0;F5GXJ4;H0Y860;Q9P246;H7C5A5;H7C5K2;H7C5C6	618;610;531;523;523;231;125	Stromal interaction molecule 2	STIM2;STIM2;STIM2;STIM2;STIM2;STIM2;STIM2	S			0.210264	0.24123	0.471031	0.24123				1	0.00123503	77.912	0.849014	77.912	7.49981	638.308	0.26948	RSSSLCRSRRSIVPSSPQPQRAQLAPHAPHP	_SIVPSS(ph)PQPQR_	MAPK3_MAPK1_MAPK7_NLK_group	MAPK3	0.1973	0.1715	1.4832					ERK1,2 kinase substrate motif;GSK-3, ERK1, ERK2, CDK5 substrate motif;MDC1 BRCT domain binding motif;Plk1 PBD domain binding motif;WW domain binding motif
E9PGD0	756	E9PGD0	756	E9PGD0;F5GXJ4;H0Y860;Q9P246	756;748;669;661	Stromal interaction molecule 2	STIM2;STIM2;STIM2;STIM2	S			0.197991	0.80554	0.314174	0.314174				1	0.00524585	69.554	0.999977	69.554	46.5054	532.23	0.99443	VSWGSPDCVGLTETKSMIFSPASKVYNGILE	_S(ph)M(ox)IFSPASK_	CK1_group;PAK_group	CSNK1A1;PAK1	0.11245	0.13085	1.212					Casein kinase I substrate motif;G protein-coupled receptor kinase 1 substrate motif;GSK3 kinase substrate motif
E9PGK7	38	E9PGK7	38	E9PGK7;O94759;C9JZQ8	38;38;38	Transient receptor potential cation channel subfamily M member 2	TRPM2;TRPM2;TRPM2	S			-0.09968	-0.148433	0.455439	-0.0996799				1	0.00116937	92.943	0.847198	92.943	10.4489	509.74	-0.50263	RVTDLGMVSNLRRSNSSLFKSWRLQCPFGNN	_RSNS(ph)SLFK_	CaMKII_group;PAK_group;PKC_group	CAMK2A;PAK1;PRKCB	0.1368	0.2891	1.3617					14-3-3 domain binding motif;Calmodulin-dependent protein kinase II substrate motif;Calmodulin-dependent protein kinase IV substrate motif;Chk1 kinase substrate motif;PKA kinase substrate motif;PKC kinase substrate motif;ZIP kinase substrate motif
E9PGY0	329	E9PGY0	329	E9PGY0;Q99081;B4DGI9;F5GY10;B4E1W1	329;333;329;163;97	Transcription factor 12	TCF12;TCF12;TCF12;TCF12;TCF12	S			-0.736605			-0.736605				1	0.0111231	51.566	0.697787	51.566	4.48437	707.304	1.4442	GSDSILGTRGNAAGSSQTGDALGKALASIYS	_GNAAGSS(ph)QTGDALGK_										ATM kinase substrate motif;Casein kinase II substrate motif;DNA dependent Protein kinase substrate motif;MDC1 BRCT domain binding motif;Plk1 PBD domain binding motif
E9PGY0	578	E9PGY0;B4DZP2	578;192	E9PGY0;Q99081;B4DGI9;F5GY10;B4E1W1;B4DZP2	578;558;578;412;322;192	Transcription factor 12	TCF12;TCF12;TCF12;TCF12;TCF12;TCF12	S										1	2.23e-22	165.1	0.363605	165.1	0	1000.42	0.68468	ESSQKDIKVSSRGRTSSTNEDEDLNPEQKIE	_GRT(ph)SSTNEDEDLNPEQK_	PAK_group	PAK1	0.1857	0.1323	1.3617					Casein kinase II substrate motif;PKA kinase substrate motif;PKC kinase substrate motif
E9PGY0	579	E9PGY0;B4DZP2	579;193	E9PGY0;Q99081;B4DGI9;F5GY10;B4E1W1;B4DZP2	579;559;579;413;323;193	Transcription factor 12	TCF12;TCF12;TCF12;TCF12;TCF12;TCF12	S			0.0305479	0.159371	0.00647761	0.030548				1	4.27e-42	196.32	0.971576	146.3	16.0011	893.854	-1.2664	SSQKDIKVSSRGRTSSTNEDEDLNPEQKIER	_TSS(ph)TNEDEDLNPEQK_	PAK_group	PAK1	0.1892	0.1323	1.3617					14-3-3 domain binding motif;Akt kinase substrate motif;Calmodulin-dependent protein kinase II substrate motif;Casein kinase II substrate motif;MAPKAPK1 kinase substrate motif;MDC1 BRCT domain binding motif;PKA kinase substrate motif;PKC kinase substrate motif;Plk1 PBD domain binding motif
E9PGY0	94	E9PGY0	94	E9PGY0;Q99081;B4DGI9;H0YNQ5	94;98;94;98	Transcription factor 12	TCF12;TCF12;TCF12;TCF12	S			0.498047		0.113567	0.305795				1	0.010335	42.746	0.801249	42.746	6.06885	738.33	-0.20051	SDHLNDSRLGAHEGLSPTPFMNSNLMGKTSE	_LGAHEGLS(ph)PTPFM(ox)NSNLM(ox)GK_	MAPK3_MAPK1_MAPK7_NLK_group	MAPK1;MAPK3	0.3076	0.31935	1.95415					Casein kinase I substrate motif;Casein kinase II substrate motif;ERK1,2 kinase substrate motif;GSK-3, ERK1, ERK2, CDK5 substrate motif;WW domain binding motif
E9PGY0	577	E9PGY0;B4DZP2	577;191	E9PGY0;Q99081;B4DGI9;F5GY10;B4E1W1;B4DZP2	577;557;577;411;321;191	Transcription factor 12	TCF12;TCF12;TCF12;TCF12;TCF12;TCF12	T										1	2.23e-22	165.1	0.363605	165.1	0	1000.42	0.68468	DESSQKDIKVSSRGRTSSTNEDEDLNPEQKI	_GRT(ph)SSTNEDEDLNPEQK_	CaMKII_group;PAK_group	CAMK2A;PAK1	0.0864	0.1494	1.1833					Calmodulin-dependent protein kinase II substrate motif;Casein kinase I substrate motif;MAPKAPK2 kinase substrate motif;PKC kinase substrate motif
E9PGY0	580	E9PGY0;B4DZP2	580;194	E9PGY0;Q99081;B4DGI9;F5GY10;B4E1W1;B4DZP2	580;560;580;414;324;194	Transcription factor 12	TCF12;TCF12;TCF12;TCF12;TCF12;TCF12	T										1	0.0016571	89.028	0.308021	89.028	1.25609	1000.42	-1.0652	SQKDIKVSSRGRTSSTNEDEDLNPEQKIERE	_GRTSST(ph)NEDEDLNPEQK_	CK1_group	CSNK1A1	0.1023	0.329	1.1194					Casein kinase II substrate motif;MDC1 BRCT domain binding motif;Plk1 PBD domain binding motif
E9PHK9	1148	E9PHK9	1148	E9PHK9;Q13428	1148;1111	Treacle protein	TCOF1;TCOF1	S			-0.0724828	0.130799	-0.0297942	-0.0297942				1	0.00426271	44.6	0.73638	41.086	7.71708	894.427	-0.36872	PSSGVDSAVGTLPATSPQSTSVQAKGTNKLR	_TQPSSGVDSAVGTLPATS(ph)PQSTSVQAK_										Casein kinase I substrate motif;Casein kinase II substrate motif;ERK1,2 kinase substrate motif;G protein-coupled receptor kinase 1 substrate motif;GSK-3, ERK1, ERK2, CDK5 substrate motif;WW domain binding motif
E9PJ55	55	E9PJ55	55	E9PJ55;Q9NUJ3;E9PMB0;E9PP52;R4GNF5	55;55;55;55;55	T-complex protein 11-like protein 1	TCP11L1;TCP11L1;TCP11L1;TCP11L1	S			-0.0600814	0.0153548	0.104068	0.0153548				1	0.00435774	64.55	0.592552	64.55	1.62655	414.203	0.15181	IKSDSSSPQRVQRPHSSPPRFVTVEELLETA	_VQRPHS(ph)SPPR_	PAK_group	PAK1	0.1835	0.0841	1.3617					14-3-3 domain binding motif;Calmodulin-dependent protein kinase II substrate motif;Calmodulin-dependent protein kinase IV substrate motif;Chk1 kinase substrate motif;PKA kinase substrate motif;PKC kinase substrate motif
E9PJA7	337	E9PJA7	337	E9PJA7	337		BCLAF1	S			0.486251		0.160146	0.283803				1	0.00198114	87.184	1	87.184	87.1843	573.807	0.65271	DGGDQETAKTGKFLKSPPLHKNLDAREKSTF	_FLKS(ph)PPLHK_	CLK_group;MAPK3_MAPK1_MAPK7_NLK_group	CLK1;MAPK3	0.1145	0.45725	2.2679					ERK1, ERK2, SAPK, CDK5 and GSK3 kinase substrate motif;ERK1,2 kinase substrate motif;Growth associated histone HI kinase substrate motif;GSK-3, ERK1, ERK2, CDK5 substrate motif;PKA kinase substrate motif;WW domain binding motif
E9PK25	41	E9PK25	41	E9PK25;P23528;E9PP50;E9PS23	41;3;3;3	Cofilin-1	CFL1;CFL1;CFL1;CFL1	S			-0.183998	-0.428993	-0.27066	-0.270974	-0.152292	-0.0172418		0.880767	3.83e-39	199.96	1	109.83	81.2457	591.792	-0.57551	RIWDATYSDGYVRPASGVAVSDGVIKVFNDM	_AS(ph)GVAVSDGVIK_	CaMKII_group;PAK_group;PKD_group;ROCK_group	CAMK2A;PAK1;PAK4;PRKD1;ROCK1	0.1291	0.5109	2.3247					14-3-3 domain binding motif;AMP-activated protein kinase substrate motif;Calmodulin-dependent protein kinase II substrate motif;Calmodulin-dependent protein kinase IV substrate motif;HMGCoA Reductase kinase substrate motif;PKA kinase substrate motif;PKC kinase substrate motif
E9PK25	79	E9PK25	79	E9PK25;P23528;E9PP50;G3V1A4;E9PS23;E9PQB7;E9PLJ3	79;41;41;24;41;24;24	Cofilin-1	CFL1;CFL1;CFL1;CFL1;CFL1;CFL1;CFL1	S			-0.155116			-0.155116	-0.000360719	-0.0172418		0.880767	9.42e-05	94.781	1	94.781	94.781	695.328	1.0521	PEEVKKRKKAVLFCLSEDKKNIILEEGKEIL	_AVLFCLS(ph)EDKK_	PKC_group;PKD_group;ROCK_group	PRKCA;PRKCB;PRKD1;ROCK1	0.13625	0.4484	1.90985					G protein-coupled receptor kinase 1 substrate motif
E9PK25	194	E9PK25	194	E9PK25;P23528;G3V1A4	194;156;139	Cofilin-1	CFL1;CFL1;CFL1	S			-0.0194335	-0.0831718	-0.00280156	-0.0194336	-0.00585478	-0.0172418		0.880767	5.3e-13	147.09	0.999961	147.09	44.0487	710.876	0.87967	EEVKDRCTLAEKLGGSAVISLEGKPL_____	_LGGS(ph)AVISLEGKPL_	CK1_group;PKC_group;ROCK_group	CSNK1A1;PRKCA;PRKCB;ROCK1	0.13825	0.3799	1.4774					Casein kinase I substrate motif;G protein-coupled receptor kinase 1 substrate motif;GSK3 kinase substrate motif;PKA kinase substrate motif
E9PMV1	42	E9PMV1	42	E9PMV1	42		PLEC	S										1	0.00793626	50.055	0.996432	50.055	24.7976	806.336	-0.55981	DTLPWNLGKTQRSRRSGGGAGSNGSVLDPAE	_S(ph)GGGAGSN(de)GSVLDPAER_	PAK_group;PKC_group	PAK1;PRKCA;PRKCB	0.1335	0.3742	1.3617					G protein-coupled receptor kinase 1 substrate motif;PKA kinase substrate motif;PKC kinase substrate motif
E9PN30	180	E9PN30	180	E9PN30;Q9BQE4;Q6GYA4;E9PJB8	180;140;140;117	Selenoprotein S	SELS;SELS	S			0.00417777			0.00417776				1	0.0154922	41.615	0.999161	41.615	35.1118	622.622	0.37863	GKSYKGNAKKPQEEDSPGPSTSSVLKRKSDR	_KPQEEDS(ph)PGPSTSSVLK_	MAPK3_MAPK1_MAPK7_NLK_group	MAPK3	0.2053	0.2984	1.5229					b-Adrenergic Receptor kinase substrate motif;Casein kinase I substrate motif;ERK1,2 kinase substrate motif;G protein-coupled receptor kinase 1 substrate motif;GSK3 kinase substrate motif;GSK-3, ERK1, ERK2, CDK5 substrate motif;WW domain binding motif
E9PN81	3	E9PN81	3	E9PN81;Q8TDP1	3;3	Ribonuclease H2 subunit C	RNASEH2C;RNASEH2C	S			0.0697021	0.144308	0.312781	0.107018	0.113167	0.116631		0.10822	0.000122018	94.728	1	76.262	76.262	665.255	-0.50277	_____________MESGDEAAIERHRVHLRS	_(ac)MES(ph)GDEAAIER_	CaMKII_group	CAMK2A	0.1581	0.1005	1.9017					b-Adrenergic Receptor kinase substrate motif;Casein kinase II substrate motif;G protein-coupled receptor kinase 1 substrate motif
E9PPM1	14	E9PPM1	14	E9PPM1;O14683;E9PKZ4;U3KQ32;E9PIK4;E9PIN5;E9PQ46;E9PMW4;E9PMY0;E9PS55;E9PKN9;E9PNB3;E9PN66	14;14;14;14;14;42;14;14;14;14;14;14;14	Tumor protein p53-inducible protein 11	TP53I11;TP53I11;TP53I11;TP53I11;TP53I11;TP53I11;TP53I11;TP53I11;TP53I11;TP53I11;TP53I11;TP53I11	S			-0.0829732	-0.249051	0.0422241	-0.0829731				1	1.15e-19	188.09	1	185.57	64.0917	625.798	-0.36122	__MAAKQPPPLMKKHSQTDLVSRLKTRKILG	_KHS(ph)QTDLVSR_	ATM_ATR_group;PAK_group;PKC_group	ATM;PAK1;PRKCD	0.098	0.2862	1.384					AMP-activated protein kinase substrate motif;ATM kinase substrate motif;Calmodulin-dependent protein kinase II substrate motif;Casein kinase II substrate motif;Chk1 kinase substrate motif;DNA dependent Protein kinase substrate motif;HMGCoA Reductase kinase substrate motif;PKA kinase substrate motif;PKC kinase substrate motif;Pyruvate dehydrogenase kinase substrate motif
E9PQ01	836	E9PQ01;O94913	836;705	E9PQ01;E9PKN0;O94913	836;705;705	Pre-mRNA cleavage complex 2 protein Pcf11	PCF11;PCF11;PCF11	S			0.0462816	0.0766959	-0.0615411	0.0766959				1	5.6e-12	138.91	1	59.898	59.8981	650.808	-2.3505	HDEQVSAKGVREEQRSPFNDRFPLKRPRYED;RQLFQYQEGVREEQRSPFNDRFPLKRPRYED	_S(ph)PFNDRFPLK_										Casein kinase I substrate motif;Casein kinase I substrate motif;ERK1,2 kinase substrate motif;ERK1,2 kinase substrate motif;Growth associated histone HI kinase substrate motif;Growth associated histone HI kinase substrate motif;GSK-3, ERK1, ERK2, CDK5 substrate motif;GSK-3, ERK1, ERK2, CDK5 substrate motif;WW domain binding motif;WW domain binding motif
E9PQ01	908	E9PQ01;O94913	908;777	E9PQ01;E9PKN0;O94913	908;777;777	Pre-mRNA cleavage complex 2 protein Pcf11	PCF11;PCF11;PCF11	S			0.18916	0.401521	0.147307	0.184598				1	1.02e-13	157.58	1	124.2	124.195	735.347	-0.15718	RDGPTKMIFEGPNKLSPRIDGPPTPASLRFD	_MIFEGPN(de)KLS(ph)PR_	MAPK3_MAPK1_MAPK7_NLK_group	MAPK3	0.1681	0.1787	1.416					ERK1,2 kinase substrate motif;Growth associated histone HI kinase substrate motif;GSK-3, ERK1, ERK2, CDK5 substrate motif;PKA kinase substrate motif;PKC kinase substrate motif;WW domain binding motif
E9PQ01	800	E9PQ01	800	E9PQ01	800		PCF11	S			-0.012359	-0.0440772	-0.0230352	-0.0230352				1	0.000136114	116.13	0.999999	116.13	60.1145	526.766	-0.094225	QFDRKEQFSERARRLSPISGSRTYAENLSPH	_RLS(ph)PISGSR_	CLK_group;MAPK3_MAPK1_MAPK7_NLK_group;PAK_group;PKA_group	CLK1;MAPK3;PAK1;PRKACA	0.22905	0.2259	1.34015					14-3-3 domain binding motif;Akt kinase substrate motif;Calmodulin-dependent protein kinase II substrate motif;Casein kinase I substrate motif;Casein kinase II substrate motif;ERK1,2 kinase substrate motif;GSK-3, ERK1, ERK2, CDK5 substrate motif;MAPKAPK1 kinase substrate motif;PAK2 kinase substrate motif;PKA kinase substrate motif;PKC epsilon kinase substrate motif;PKC kinase substrate motif;WW do…
E9PQ01	511	E9PQ01;O94913	511;511	E9PQ01;E9PKN0;O94913	511;511;511	Pre-mRNA cleavage complex 2 protein Pcf11	PCF11;PCF11;PCF11	S			0.50853			0.50853				1	0.00035356	110.66	0.999908	110.66	41.2109	508.212	-0.11303	KRRDRRSPKRRQRSMSPTSTPKAGKIRQSGA	_SMS(ph)PTSTPK_	CLK_group;MAPK3_MAPK1_MAPK7_NLK_group;PAK_group;PKB_group	AKT1;AKT2;CLK1;MAPK1;MAPK3;PAK1	0.29495	0.38495	1.1416					14-3-3 domain binding motif;Akt kinase substrate motif;Calmodulin-dependent protein kinase II substrate motif;Casein kinase I substrate motif;Casein kinase II substrate motif;ERK1,2 kinase substrate motif;G protein-coupled receptor kinase 1 substrate motif;GSK-3, ERK1, ERK2, CDK5 substrate motif;MAPKAPK1 kinase substrate motif;PKA kinase substrate motif;PKC kinase substrate motif;WW domain bindin…
E9PQ01	489	E9PQ01;O94913	489;489	E9PQ01;E9PKN0;O94913	489;489;489	Pre-mRNA cleavage complex 2 protein Pcf11	PCF11;PCF11;PCF11	S			0.162081	0.113834	-0.1794	0.0731347				1	3.35e-11	163.8	0.991928	163.8	20.8949	641.291	0.56788	SSTRKRSRSRSPKSRSPIIHSPKRRDRRSPK	_SRS(ph)PIIHS(ph)PK_	MAPK3_MAPK1_MAPK7_NLK_group	MAPK3	0.1684	0.1787	1.4164					ERK1,2 kinase substrate motif;Growth associated histone HI kinase substrate motif;GSK-3, ERK1, ERK2, CDK5 substrate motif;PKA kinase substrate motif;PKC kinase substrate motif;WW domain binding motif
E9PQ01	494	E9PQ01;O94913	494;494	E9PQ01;E9PKN0;O94913	494;494;494	Pre-mRNA cleavage complex 2 protein Pcf11	PCF11;PCF11;PCF11	S			-0.00434902	0.203765	-0.107539	0.203765				1	3.35e-11	163.8	1	88.385	79.7862	427.863	-0.54716	RSRSRSPKSRSPIIHSPKRRDRRSPKRRQRS	_SRS(ph)PIIHS(ph)PK_	PKC_group	PRKCA;PRKCB	0.2232	0.1545	1.69385					Cdc2 kinase substrate motif;CDK kinase substrate motif;CDK1,2,4,6 kinase substrate motif;ERK1,2 kinase substrate motif;Growth associated histone HI kinase substrate motif;GSK-3, ERK1, ERK2, CDK5 substrate motif;PKA kinase substrate motif;PKC kinase substrate motif;WW domain binding motif
E9PQ01	487	E9PQ01;O94913	487;487	E9PQ01;E9PKN0;O94913	487;487;487	Pre-mRNA cleavage complex 2 protein Pcf11	PCF11;PCF11;PCF11	S			0.116498	-0.367918		0.063779				1	1.4e-09	156.57	0.728746	116.06	4.292	427.863	-0.12255	GRSSTRKRSRSRSPKSRSPIIHSPKRRDRRS	_S(ph)RSPIIHS(ph)PK_	PAK_group;PKC_group	PAK1;PRKCA;PRKCB	0.1799	0.1667	1.3617					Casein kinase II substrate motif
E9PRY8	549	E9PRY8;E9PPR1	549;133	E9PRY8;P29692;E9PK01;E9PI39;E9PQ49;E9PL71;E9PQZ1;E9PL12;E9PK06;E9PPR1	549;133;133;133;133;109;90;133;114;133	Elongation factor 1-delta	EEF1D;EEF1D;EEF1D;EEF1D;EEF1D;EEF1D;EEF1D;EEF1D;EEF1D;EEF1D	S			0.0291349	-0.0202088	0.0082	0.00345832	-0.172474	-0.0529398		0.799681	1.81e-70	251.81	1	251.81	69.7219	752.342	-0.27591	SSPGHRATAPQTQHVSPMRQVEPPAKKPATP	_ATAPQTQHVS(ph)PMR_	CDK2_CDK3_CDK1_CDK5_group;RSK_group	CDK1;RPS6KA1	0.17055	0.6765	9.66035					Cdc2 kinase substrate motif;CDK kinase substrate motif;CDK1,2,4,6 kinase substrate motif;ERK1,2 kinase substrate motif;GSK-3, ERK1, ERK2, CDK5 substrate motif;WW domain binding motif
E9PRY8	502	E9PRY8;E9PPR1	502;86	E9PRY8;P29692;E9PK01;E9PI39;E9PQ49;E9PL71;E9PL12;H0YCK7;E9PMW7;E9PIZ1;E9PN91;E9PPR1	502;86;86;86;86;62;86;166;86;102;62;86	Elongation factor 1-delta	EEF1D;EEF1D;EEF1D;EEF1D;EEF1D;EEF1D;EEF1D;EEF1D;EEF1D;EEF1D;EEF1D;EEF1D	S			0.246834			0.246834	-0.0529398	-0.0529398		0.799681	0.00630516	57.788	0.999977	57.788	46.4124	719.851	0.32713	SGTSGDHGELVVRIASLEVENQSLRGVVQEL	_IAS(ph)LEVENQSLR_	CaMKII_group;PKC_group;RSK_group	CAMK2A;PRKCA;RPS6KA1	0.0728	0.619	1.9017					14-3-3 domain binding motif;Calmodulin-dependent protein kinase II alpha substrate motif;Calmodulin-dependent protein kinase II substrate motif;Calmodulin-dependent protein kinase IV substrate motif;Casein kinase II substrate motif;Chk1 kinase substrate motif;Phosphorylase kinase substrate motif;PKA kinase substrate motif;PKC kinase substrate motif
E9PRY8	578	E9PRY8	578	E9PRY8;P29692;E9PK01;E9PI39;E9PQ49;E9PL71;E9PQZ1;H0YE72	578;162;162;162;162;138;119;37	Elongation factor 1-delta	EEF1D;EEF1D;EEF1D;EEF1D;EEF1D;EEF1D;EEF1D;EEF1D	S			-0.230262	-0.136347	-0.140046	-0.165968		-0.0529398		0.599362	3.28e-125	235.93	1	157.42	137.328	986.659	0.69957	TPAEDDEDDDIDLFGSDNEEEDKEAAQLREE	_PATPAEDDEDDDIDLFGS(ph)DNEEEDKEAAQLREER_	CK2_group;RSK_group	CSNK2A1;RPS6KA1	0.26395	0.619	10.2143					Casein kinase II substrate motif
E9PRY8	534	E9PRY8;E9PPR1	534;118	E9PRY8;P29692;E9PK01;E9PI39;E9PQ49;E9PL71;E9PQZ1;E9PL12;H0YCK7;E9PMW7;E9PK06;E9PN91;E9PPR1	534;118;118;118;118;94;75;118;198;118;99;94;118	Elongation factor 1-delta	EEF1D;EEF1D;EEF1D;EEF1D;EEF1D;EEF1D;EEF1D;EEF1D;EEF1D;EEF1D;EEF1D;EEF1D;EEF1D	S				0.935761	0.211386	0.211386		-0.0529398		0.799681	1.88e-11	147.12	0.880719	123.72	8.68264	708.853	-0.28193	QAISKLEARLNVLEKSSPGHRATAPQTQHVS	_LNVLEKS(ph)SPGHR_	CK2_group;PKC_group;RSK_group	CSNK2A1;PRKCA;RPS6KA1	0.0766	0.619	1.7241
E9PRY8	535	E9PRY8;E9PPR1	535;119	E9PRY8;P29692;E9PK01;E9PI39;E9PQ49;E9PL71;E9PQZ1;E9PL12;H0YCK7;E9PMW7;E9PK06;E9PN91;E9PPR1	535;119;119;119;119;95;76;119;199;119;100;95;119	Elongation factor 1-delta	EEF1D;EEF1D;EEF1D;EEF1D;EEF1D;EEF1D;EEF1D;EEF1D;EEF1D;EEF1D;EEF1D;EEF1D;EEF1D	S			0.293017	0.41186	1.20345	0.748204		-0.0529398		0.799681	1.06e-20	147.12	0.853784	146.96	7.66352	472.905	0.78435	AISKLEARLNVLEKSSPGHRATAPQTQHVSP	_LNVLEKSS(ph)PGHR_	CDK2_CDK3_CDK1_CDK5_group;RSK_group	CDK1;RPS6KA1	0.1835	0.6765	9.72725					Casein kinase I substrate motif;ERK1,2 kinase substrate motif;GSK-3, ERK1, ERK2, CDK5 substrate motif;MDC1 BRCT domain binding motif;PKA kinase substrate motif;PKC kinase substrate motif;Plk1 PBD domain binding motif;WW domain binding motif
E9PRY8	563	E9PRY8	563	E9PRY8;P29692;E9PK01;E9PI39;E9PQ49;E9PL71;E9PQZ1;H0YE72	563;147;147;147;147;123;104;22	Elongation factor 1-delta	EEF1D;EEF1D;EEF1D;EEF1D;EEF1D;EEF1D;EEF1D;EEF1D	T			-0.0133197	-0.0953271	0.0173518	-0.0133197		-0.0529398		0.599362	2.81e-41	178.48	1	178.48	178.481	935.128	-0.9134	VSPMRQVEPPAKKPATPAEDDEDDDIDLFGS	_KPAT(ph)PAEDDEDDDIDLFGS(ph)DNEEEDKEAAQLR_	CDK2_CDK3_CDK1_CDK5_group;RSK_group	CDK1;RPS6KA1	0.1158	0.6765	5.3885					Casein kinase II substrate motif;ERK1,2 kinase substrate motif;GSK3, Erk1, Erk2 and CDK5 kinase motif;GSK-3, ERK1, ERK2, CDK5 substrate motif;PKA kinase substrate motif;PKC kinase substrate motif;WW domain binding motif
E9PRZ1	6	E9PRZ1	6	E9PRZ1;Q96ER3;J3KND1;E9PMD2;E9PL53	6;6;6;6;6	Protein SAAL1	SAAL1;SAAL1;SAAL1;SAAL1	S			0.012068	-0.0291022	0.0946415	0.012068				1	1.52e-10	138.39	1	68.919	68.9194	722.308	1.7957	__________MDRNPSPPPPGRDKEEEEEVA	_(ac)MDRN(de)PS(ph)PPPPGR_	MAPK3_MAPK1_MAPK7_NLK_group	MAPK1;MAPK3	0.2654	0.10045	1.7065					14-3-3 domain binding motif;Calmodulin-dependent protein kinase II substrate motif;Calmodulin-dependent protein kinase IV substrate motif;Chk1 kinase substrate motif;DNA dependent Protein kinase substrate motif;ERK1,2 kinase substrate motif;G protein-coupled receptor kinase 1 substrate motif;GSK-3, ERK1, ERK2, CDK5 substrate motif;PKA kinase substrate motif;PKC kinase substrate motif;WW domain bi…
E9PRZ1	237	E9PRZ1	237	E9PRZ1;Q96ER3;J3KND1;E9PMD2;H0YEK5;H0YCN7	237;237;237;237;126;74	Protein SAAL1	SAAL1;SAAL1;SAAL1;SAAL1;SAAL1	S			0.0206267	-0.000115405	-0.279004	-0.0407343				1	2.56e-05	91.114	1	55.469	55.469	1225.53	-1.1151	VRNGAAQPLDQPQEESEEQPVFRLVPCILEA	_N(de)GAAQPLDQPQEES(ph)EEQPVFR_										b-Adrenergic Receptor kinase substrate motif;Casein kinase II substrate motif;G protein-coupled receptor kinase 1 substrate motif
E9PRZ1	54	E9PRZ1	54	E9PRZ1;Q96ER3;J3KND1;E9PMD2;E9PL53;H0YDM3	54;54;54;54;54;47	Protein SAAL1	SAAL1;SAAL1;SAAL1;SAAL1;SAAL1	S										1	0.000819862	63.869	0.333213	63.869	0	1378.01	1.3663	VLSGLIQIVSPENTKSSSDDEEQLTELDEEM	_S(ph)SSDDEEQLTELDEEM(ox)EN(de)EICR_	PAK_group	PAK1	0.1392	0.0816	1.2928					Casein kinase II substrate motif;Pyruvate dehydrogenase kinase substrate motif
E9PRZ1	55	E9PRZ1	55	E9PRZ1;Q96ER3;J3KND1;E9PMD2;E9PL53;H0YDM3	55;55;55;55;55;48	Protein SAAL1	SAAL1;SAAL1;SAAL1;SAAL1;SAAL1	S										1	0.000819862	63.869	0.333213	63.869	0	1378.01	1.3663	LSGLIQIVSPENTKSSSDDEEQLTELDEEME	_S(ph)SSDDEEQLTELDEEM(ox)EN(de)EICR_										Casein kinase II substrate motif;MDC1 BRCT domain binding motif;PKA kinase substrate motif;PKC kinase substrate motif;Plk1 PBD domain binding motif;Pyruvate dehydrogenase kinase substrate motif
E9PRZ1	56	E9PRZ1	56	E9PRZ1;Q96ER3;J3KND1;E9PMD2;E9PL53;H0YDM3	56;56;56;56;56;49	Protein SAAL1	SAAL1;SAAL1;SAAL1;SAAL1;SAAL1	S										1	0.000819862	63.869	0.333213	63.869	0	1378.01	1.3663	SGLIQIVSPENTKSSSDDEEQLTELDEEMEN	_S(ph)SSDDEEQLTELDEEM(ox)EN(de)EICR_										BARD1 BRCT domain binding motif;Casein kinase II substrate motif;MDC1 BRCT domain binding motif;PKA kinase substrate motif;PKC kinase substrate motif;Plk1 PBD domain binding motif
E9PSH4	75	E9PSH4	75	E9PSH4;Q9H063;E9PR76	75;75;75	Repressor of RNA polymerase III transcription MAF1 homolog	MAF1;MAF1;MAF1	S		+	-0.865043	-1.12737	-0.85285	-0.950146				1	1.68e-53	215.65	1	75.143	68.7247	706.782	-0.61744	SPPQTSGLSPSRLSKSQGGEEEGPLSDKCSR	_S(ph)QGGEEEGPLSDK_	PAK_group	PAK1	0.1148	0.1446	1.2042					ATM kinase substrate motif;DNA dependent Protein kinase substrate motif
E9PSH4	65	E9PSH4	65	E9PSH4;Q9H063;E9PR76	65;65;65	Repressor of RNA polymerase III transcription MAF1 homolog	MAF1;MAF1;MAF1	S										1	0.0139274	40.837	0.320371	40.837	0	977.783	4.064	EGQPHVLEALSPPQTSGLSPSRLSKSQGGEE	_QFCQ(de)EGQPHVLEALSPPQT(ph)SGLSPSR_	CaMKII_group;PAK_group	CAMK2A;PAK1	0.0863	0.164	1.15515					Casein kinase I substrate motif;Casein kinase II substrate motif;G protein-coupled receptor kinase 1 substrate motif
E9PSH4	64	E9PSH4	64	E9PSH4;Q9H063;E9PR76	64;64;64	Repressor of RNA polymerase III transcription MAF1 homolog	MAF1;MAF1;MAF1	T										1	0.0139274	40.837	0.320371	40.837	0	977.783	4.064	QEGQPHVLEALSPPQTSGLSPSRLSKSQGGE	_QFCQ(de)EGQPHVLEALSPPQT(ph)SGLSPSR_										G protein-coupled receptor kinase 1 substrate motif;MAPKAPK2 kinase substrate motif
F2Z2X4	521	F2Z2X4	521	F2Z2X4;Q9C0E2	521;521	Exportin-4	XPO4;XPO4	S			0.0237522	0.00504059	-0.0709059	0.00504062				1	2.4e-82	254.71	0.999855	127.47	38.4986	630.63	0.3333	RLHGQLQRHQQQLLASPGSSTVDNKMLDDLY	_HQQQLLAS(ph)PGSSTVDNK_										Casein kinase I substrate motif;Casein kinase II substrate motif;ERK1,2 kinase substrate motif;G protein-coupled receptor kinase 1 substrate motif;GSK3 kinase substrate motif;GSK-3, ERK1, ERK2, CDK5 substrate motif;WW domain binding motif
F5GX05	462	F5GX05	462	F5GX05;J3KT37	462;119		EPB41L3	S			0.0911243		0.0589399	0.0911243		-0.126517		0.600065	4.95e-16	157.79	0.895986	157.79	9.35211	906.872	0.95158	ASVNENHEIYMKDSMSAAEVGTGQYATTKGI	_DSM(ox)S(ph)AAEVGTGQYATTK_										AMP-activated protein kinase substrate motif;Casein kinase I substrate motif;Casein kinase II substrate motif;PKA kinase substrate motif
F5GX05	478	F5GX05;Q9Y2J2	478;460	F5GX05;J3KT37;Q9Y2J2	478;135;460	Band 4.1-like protein 3	EPB41L3;EPB41L3	S			0.0593554	0.026021	0.122607	0.0551957		-0.126517		0.800032	3.39e-106	283.12	0.999995	276.03	52.9727	841.424	-0.24276	AAEVGTGQYATTKGISQTNLITTVTPEKKAE;DGEVGTGQYATTKGISQTNLITTVTPEKKAE	_GIS(ph)QTNLITTVTPEK_	PKC_group	PRKCB	0.1185	0.2233	1.1033					ATM kinase substrate motif;ATM kinase substrate motif;Casein kinase II substrate motif;Casein kinase II substrate motif;DNA dependent Protein kinase substrate motif;DNA dependent Protein kinase substrate motif;PKA kinase substrate motif;PKA kinase substrate motif;PKC kinase substrate motif;PKC kinase substrate motif
F5GX05	99	F5GX05;Q9Y2J2	99;99	F5GX05;J3QS55;J3QR33;J3QKK4;J3KRD1;J3QKY2;Q9Y2J2	99;99;99;99;99;99;99	Band 4.1-like protein 3	EPB41L3;EPB41L3	S			-0.330483	0.409581	0.560421	0.468531		-0.126517		0.800032	0.0120192	64.73	1	46.819	46.8189	432.751	0.068848	DDKLSQKSSSSKLSRSPLKIVKKPKSMQCKV	_S(ph)PLKIVK_	CDK2_CDK3_CDK1_CDK5_group	CDK1	0.3351	0.3801	1.7832					Cdc2 kinase substrate motif;CDK kinase substrate motif;CDK1,2,4,6 kinase substrate motif;ERK1,2 kinase substrate motif;Growth associated histone HI kinase substrate motif;GSK-3, ERK1, ERK2, CDK5 substrate motif;PKA kinase substrate motif;WW domain binding motif
F5GX05	591	F5GX05;Q9Y2J2	591;760	F5GX05;Q9Y2J2;F5H7W5;E7EUF8	591;760;32;32	Band 4.1-like protein 3	EPB41L3;EPB41L3;EPB41L3;EPB41L3	S			0.106884	0.128161	-0.376658	0.106884		-0.126517		0.800032	1.37e-08	128.88	0.999948	128.88	42.6913	538.238	-0.1812	TSTDTAVTNEWEKRLSTSPVRLAARQEDAPM	_RLS(ph)T(ph)SPVR_	PAK_group;PKA_group;PKC_group	PAK1;PRKACA;PRKCB	0.1902	0.2233	1.3186					Casein kinase II substrate motif;PAK2 kinase substrate motif;PKA kinase substrate motif;PKC kinase substrate motif
F5GX05	593	F5GX05;Q9Y2J2	593;762	F5GX05;Q9Y2J2;F5H7W5;E7EUF8	593;762;34;34	Band 4.1-like protein 3	EPB41L3;EPB41L3;EPB41L3;EPB41L3	S			0.0847447	-0.866358	-0.833465	0.0847446		-0.126517		0.800032	0.0037495	124.92	0.996932	124.92	25.12	420.205	0.087766	TDTAVTNEWEKRLSTSPVRLAARQEDAPMIE	_LSTS(ph)PVR_	CDK2_CDK3_CDK1_CDK5_group	CDK1	0.2623	0.3801	1.2435					Cdc2 kinase substrate motif;CDK kinase substrate motif;CDK1,2,4,6 kinase substrate motif;ERK1,2 kinase substrate motif;Growth associated histone HI kinase substrate motif;GSK-3, ERK1, ERK2, CDK5 substrate motif;WW domain binding motif
F5GX05	420	F5GX05;Q9Y2J2	420;420	F5GX05;J3KT37;Q9Y2J2	420;77;420	Band 4.1-like protein 3	EPB41L3;EPB41L3	S			0.270828	-0.00114018		0.160017		-0.126517		0.800032	5.08e-08	128.41	1	128.41	100.47	614.64	-0.24792	KFRYSGRTQAQTRRASALIDRPAPYFERSSS	_RAS(ph)ALIDRPAPYFER_	PAK_group;PKA_group;PKC_group	PAK1;PRKACA;PRKCA;PRKCB	0.16395	0.239	1.29395					14-3-3 domain binding motif;Calmodulin-dependent protein kinase II substrate motif;PAK2 kinase substrate motif;PKA kinase substrate motif;PKC epsilon kinase substrate motif;PKC kinase substrate motif
F5GX05	443	F5GX05	443	F5GX05;J3KT37	443;100		EPB41L3	S			-0.0269839	0.206768	-0.0854508	0.032383		-0.126517		0.600065	3.94e-78	257.37	1	237.31	98.8488	944.395	0.551	PYFERSSSKRYTMSRSLDGASVNENHEIYMK	_S(ph)LDGASVN(de)ENHEIYMK_	CaMKII_group;PKC_group	CAMK2A;PRKCB	0.1044	0.2492	1.208					G protein-coupled receptor kinase 1 substrate motif
F5GX05	448	F5GX05	448	F5GX05;J3KT37	448;105		EPB41L3	S			-0.126061	-0.08982	-0.122586	-0.122586		-0.126517		0.600065	1.85e-122	295.65	1	245.1	113.125	944.395	0.71498	SSSKRYTMSRSLDGASVNENHEIYMKDSMSA	_SLDGAS(ph)VNEN(de)HEIYMK_	CK1_group	CSNK1A1	0.1407	0.2883	1.3564					Casein kinase I substrate motif;Casein kinase II substrate motif
F5GX05	793	F5GX05;Q9Y2J2	793;962	F5GX05;J3QS83;Q9Y2J2;F5H7W5;E7EUF8	793;16;962;267;259	Band 4.1-like protein 3	EPB41L3;EPB41L3;EPB41L3;EPB41L3	S			0.0799754	0.560617	0.895923	0.559834		-0.126517		0.800032	4.6e-08	111.66	0.994149	104.03	22.3034	773.363	0.55829	ESSTVKTETISFGSVSPGGVKLEISTKEVPV	_TETISFGSVS(ph)PGGVK_	CK1_group;MAPK3_MAPK1_MAPK7_NLK_group	CSNK1A1;MAPK1;MAPK3	0.2358	0.1946	1.0556					ERK1,2 kinase substrate motif;GSK-3, ERK1, ERK2, CDK5 substrate motif;WW domain binding motif
F5GX05	5	F5GX05;Q9Y2J2	5;5	F5GX05;J3QS55;J3QR33;J3QKK4;J3KRD1;J3QKY2;J3QLU5;J3KS70;J3QRQ6;Q9Y2J2	5;5;5;5;5;5;27;5;5;5	Band 4.1-like protein 3	EPB41L3;EPB41L3	S			-0.0321231	-0.0410609	-0.0694973	-0.0410608		-0.126517		0.800032	0.000112796	70.178	0.557574	70.178	0.423775	974.715	0.45572	___________MTTESGSDSESKPDQEAEPQ	_T(ph)TES(ph)GSDSESKPDQEAEPQEAAGAQGR_	CK1_group	CSNK1A1	0.115	0.2883	1.3273					b-Adrenergic Receptor kinase substrate motif;Casein kinase II substrate motif;G protein-coupled receptor kinase 1 substrate motif;GSK3 kinase substrate motif;Pyruvate dehydrogenase kinase substrate motif
F5GX05	7	F5GX05;Q9Y2J2	7;7	F5GX05;J3QS55;J3QR33;J3QKK4;J3KRD1;J3QKY2;J3QLU5;J3KS70;J3QRQ6;Q9Y2J2	7;7;7;7;7;7;29;7;7;7	Band 4.1-like protein 3	EPB41L3;EPB41L3	S			0.00805652	0.306962	-0.133765	0.157432		-0.126517		0.800032	8.53e-28	140.52	0.922464	131.9	13.0327	948.06	-0.92126	_________MTTESGSDSESKPDQEAEPQEA	_TTESGS(ph)DSESKPDQEAEPQEAAGAQGR_	CK1_group	CSNK1A1	0.1386	0.2883	1.3564					Casein kinase I substrate motif;Casein kinase II substrate motif;G protein-coupled receptor kinase 1 substrate motif;GSK3 kinase substrate motif
F5GX05	9	F5GX05;Q9Y2J2	9;9	F5GX05;J3QS55;J3QR33;J3QKK4;J3KRD1;J3QKY2;J3QLU5;J3KS70;J3QRQ6;Q9Y2J2	9;9;9;9;9;9;31;9;9;9	Band 4.1-like protein 3	EPB41L3;EPB41L3	S								-0.126517		0.800032	0.000274909	58.137	0.333333	54.658	0	988.719	0.32103	_______MTTESGSDSESKPDQEAEPQEAAG	_(ac)T(ph)T(ph)ESGSDSESKPDQEAEPQEAAGAQGR_	CK1_group	CSNK1A1	0.1038	0.2883	1.0556					b-Adrenergic Receptor kinase substrate motif;Casein kinase II substrate motif;G protein-coupled receptor kinase 1 substrate motif;MAPKAPK2 kinase substrate motif
F5GX05	11	F5GX05;Q9Y2J2	11;11	F5GX05;J3QS55;J3QR33;J3QKK4;J3KRD1;J3QKY2;J3QLU5;J3KS70;J3QRQ6;Q9Y2J2	11;11;11;11;11;11;33;11;11;11	Band 4.1-like protein 3	EPB41L3;EPB41L3	S								-0.126517		0.800032	0.000274909	58.137	0.333333	54.658	0	988.719	0.32103	_____MTTESGSDSESKPDQEAEPQEAAGAQ	_(ac)T(ph)T(ph)ESGSDSESKPDQEAEPQEAAGAQGR_	CK1_group	CSNK1A1	0.1352	0.2883	1.3564					b-Adrenergic Receptor kinase substrate motif;Casein kinase I substrate motif;Casein kinase II substrate motif;MAPKAPK2 kinase substrate motif;Pyruvate dehydrogenase kinase substrate motif
F5GX05	63	F5GX05;Q9Y2J2	63;63	F5GX05;J3QS55;J3QR33;J3QKK4;J3KRD1;J3QKY2;J3QLU5;J3KS70;J3QRQ6;Q9Y2J2	63;63;63;63;63;63;85;63;63;63	Band 4.1-like protein 3	EPB41L3;EPB41L3	T			-1.02503	-0.311667		-0.668341		-0.126517		0.800032	5.26e-07	126.63	1	126.63	126.633	751.83	-0.6661	FAAAAAHSTPVRREVTDKEQEFAARAAKQLE	_EVT(ph)DKEQEFAAR_										Calmodulin-dependent protein kinase II substrate motif;Calmodulin-dependent protein kinase IV substrate motif;Casein kinase II substrate motif;Chk1 kinase substrate motif;PKA kinase substrate motif;PKC kinase substrate motif
F5GX05	510	F5GX05;Q9Y2J2	510;492	F5GX05;Q9Y2J2	510;492	Band 4.1-like protein 3	EPB41L3;EPB41L3	T			0.253868	0.205142	0.253868	0.248413		-0.126517		0.800032	3.21e-10	141.57	0.99984	141.57	37.9629	690.35	-0.43792	ERDEEEDKRRKGEEVTPISAIRHEGKSPGLG;ERDEEEDKRRKGEEVTPISAIRHEGKTDSER	_KGEEVT(ph)PISAIR_	MAPK3_MAPK1_MAPK7_NLK_group	MAPK3	0.1718	0.1866	1.4202					Casein kinase I substrate motif;Casein kinase I substrate motif;Casein kinase II substrate motif;Casein kinase II substrate motif;G protein-coupled receptor kinase 1 substrate motif;G protein-coupled receptor kinase 1 substrate motif;GSK-3, ERK1, ERK2, CDK5 substrate motif;GSK-3, ERK1, ERK2, CDK5 substrate motif;WW domain binding motif;WW domain binding motif
F5GX05	480	F5GX05;Q9Y2J2	480;462	F5GX05;J3KT37;Q9Y2J2	480;137;462	Band 4.1-like protein 3	EPB41L3;EPB41L3	T			0.0465608			0.0465609		-0.126517		0.800032	1.88e-31	192.63	0.752742	192.63	4.83743	630.639	-0.74194	EVGTGQYATTKGISQTNLITTVTPEKKAEEE	_GISQT(ph)NLITTVT(ph)PEKK_	PKC_group	PRKCB	0.122	0.2233	1.1373					G protein-coupled receptor kinase 1 substrate motif
F5GX05	487	F5GX05;Q9Y2J2	487;469	F5GX05;J3KT37;Q9Y2J2	487;144;469	Band 4.1-like protein 3	EPB41L3;EPB41L3	T			-0.0315037	-0.0193751	-0.0545871	-0.0369995		-0.126517		0.800032	1.67e-140	313.08	0.999634	240.07	34.45	603.983	-0.044539	ATTKGISQTNLITTVTPEKKAEEERDEEEDK	_GISQTNLITTVT(ph)PEKK_	CDK2_CDK3_CDK1_CDK5_group	CDK1	0.3374	0.3801	1.7832					Cdc2 kinase substrate motif;CDK1,2,4,6 kinase substrate motif;CDK5 kinase substrate motif;GSK-3, ERK1, ERK2, CDK5 substrate motif;WW domain binding motif
F5GX05	592	F5GX05;Q9Y2J2	592;761	F5GX05;Q9Y2J2;F5H7W5;E7EUF8	592;761;33;33	Band 4.1-like protein 3	EPB41L3;EPB41L3;EPB41L3;EPB41L3	T			-0.169972	-0.143692	-0.133179	-0.146324		-0.126517		0.800032	1.37e-08	128.88	0.97518	128.88	15.9427	538.238	-0.1812	STDTAVTNEWEKRLSTSPVRLAARQEDAPMI	_RLS(ph)T(ph)SPVR_										Calmodulin-dependent protein kinase II substrate motif;MDC1 BRCT domain binding motif;PKA kinase substrate motif;PKC kinase substrate motif;Plk1 PBD domain binding motif
F5GX05	2	F5GX05;Q9Y2J2	2;2	F5GX05;J3QS55;J3QR33;J3QKK4;J3KRD1;J3QKY2;J3QLU5;J3KS70;J3QRQ6;Q9Y2J2	2;2;2;2;2;2;24;2;2;2	Band 4.1-like protein 3	EPB41L3;EPB41L3	T								-0.126517		0.800032	1.99e-08	95.302	0.452483	87.749	0	962.063	2.663	______________MTTESGSDSESKPDQEA	_(ac)T(ph)TESGSDSESKPDQEAEPQEAAGAQGR_										Casein kinase I substrate motif;Casein kinase II substrate motif
F5GX05	3	F5GX05;Q9Y2J2	3;3	F5GX05;J3QS55;J3QR33;J3QKK4;J3KRD1;J3QKY2;J3QLU5;J3KS70;J3QRQ6;Q9Y2J2	3;3;3;3;3;3;25;3;3;3	Band 4.1-like protein 3	EPB41L3;EPB41L3	T								-0.126517		0.800032	1.99e-08	95.302	0.452483	87.749	0	962.063	2.663	_____________MTTESGSDSESKPDQEAE	_(ac)T(ph)TESGSDSESKPDQEAEPQEAAGAQGR_										G protein-coupled receptor kinase 1 substrate motif
F5GX68	714	F5GX68	714	F5GX68;P26358	714;714	Cytosine-specific methyltransferase;DNA (cytosine-5)-methyltransferase 1	DNMT1;DNMT1	S			0.0156403	0.0224743	0.0333701	0.0224743		0.0798389		0.664904	8.82e-115	282.77	1	171.78	171.778	1176.97	-0.15176	ADDDEEVDDNIPEMPSPKKMHQGKKKKQNKN	_EADDDEEVDDNIPEMPS(ph)PKK_	CDK2_CDK3_CDK1_CDK5_group;GSK3_group;HIPK1_HIPK2_group;MAPK3_MAPK1_MAPK7_NLK_group;RSK_group	CDK1;CDK2;GSK3A;GSK3B;HIPK2;MAPK3;RPS6KA3	0.0563	0.4337	1.703					Casein kinase I substrate motif;Cdc2 kinase substrate motif;CDK kinase substrate motif;CDK1,2,4,6 kinase substrate motif;DNA dependent Protein kinase substrate motif;ERK1,2 kinase substrate motif;Growth associated histone HI kinase substrate motif;GSK-3, ERK1, ERK2, CDK5 substrate motif;PKA kinase substrate motif;PKC kinase substrate motif;WW domain binding motif
F5GX68	954	F5GX68	954	F5GX68;P26358	954;954	Cytosine-specific methyltransferase;DNA (cytosine-5)-methyltransferase 1	DNMT1;DNMT1	S			0.123534	0.0953169	0.064469	0.0988238		0.0798389		0.664904	0.00255343	74.841	0.9958	74.841	23.7492	373.873	0.079399	VYLPPEAFTFNIKLSSPVKRPRKEPVDEDLY	_LSS(ph)PVKRPR_	CDK2_CDK3_CDK1_CDK5_group;GSK3_group;RSK_group	CDK1;CDK2;GSK3A;GSK3B;RPS6KA3	0.0306	0.581	2.6331					Cdc2 kinase substrate motif;CDK kinase substrate motif;CDK1,2,4,6 kinase substrate motif;ERK1,2 kinase substrate motif;Growth associated histone HI kinase substrate motif;GSK-3, ERK1, ERK2, CDK5 substrate motif;MDC1 BRCT domain binding motif;PKA kinase substrate motif;PKC kinase substrate motif;Plk1 PBD domain binding motif;WW domain binding motif
F5GX68	127	F5GX68	127	F5GX68;P26358;K7EJL0	127;127;182	Cytosine-specific methyltransferase;DNA (cytosine-5)-methyltransferase 1	DNMT1;DNMT1	S			-0.109592	-0.0808659	-0.0720732	-0.0812627		0.0798389		0.664904	5.62e-16	153.36	1	93.269	63.429	583.29	-0.3345	QARSEARRVGMADANSPPKPLSKPRTPRRSK	_RVGMADANS(ph)PPKPLSK_	CDK2_CDK3_CDK1_CDK5_group;CDK4_CDK6_group;CK1_group;GSK3_group;MAPK3_MAPK1_MAPK7_NLK_group;RSK_group	CDK1;CDK2;CDK4;CSNK1A1;GSK3A;GSK3B;MAPK3;RPS6KA3	0.1176	0.43355	1.63655					Casein kinase I substrate motif;Cdc2 kinase substrate motif;CDK kinase substrate motif;CDK1,2,4,6 kinase substrate motif;ERK1,2 kinase substrate motif;G protein-coupled receptor kinase 1 substrate motif;GSK-3, ERK1, ERK2, CDK5 substrate motif;WW domain binding motif
F5GX68	1105	F5GX68	1105	F5GX68;P26358	1105;1105	Cytosine-specific methyltransferase;DNA (cytosine-5)-methyltransferase 1	DNMT1;DNMT1	S					0.685985	0.685985		0.0798389		0.664904	0.00665709	50.053	0.999859	46.159	38.5045	578.253	0.058257	NAKSKSFEDPPNHARSPGNKGKGKGKGKGKP	_SFEDPPNHARS(ph)PGNK_	CDK2_CDK3_CDK1_CDK5_group;CDK4_CDK6_group;GSK3_group;RSK_group	CDK1;CDK2;CDK4;GSK3A;GSK3B;RPS6KA3	0.0744	0.50735	2.09685					ERK1,2 kinase substrate motif;Growth associated histone HI kinase substrate motif;GSK-3, ERK1, ERK2, CDK5 substrate motif;WW domain binding motif
F5GX68	143	F5GX68	143	F5GX68;P26358;K7EJL0;K7ENQ6;K7ERQ1	143;143;198;22;22	Cytosine-specific methyltransferase;DNA (cytosine-5)-methyltransferase 1	DNMT1;DNMT1	S			0.465295		0.739502	0.602457		0.0798389		0.664904	2.17e-06	114.99	0.99453	114.99	22.5962	583.6	-1.285	PPKPLSKPRTPRRSKSDGEAKPEPSPSPRIT	_SKS(ph)DGEAKPEPSPSPR_	CaMKII_group;CK2_group;PAK_group;RSK_group	CAMK2A;CSNK2A1;PAK1;RPS6KA3	0.16145	0.35435	2.14535					14-3-3 domain binding motif;Calmodulin-dependent protein kinase II substrate motif;Casein kinase II substrate motif;G protein-coupled receptor kinase 1 substrate motif;PKA kinase substrate motif;PKC kinase substrate motif;ZIP kinase substrate motif
F5GX74	453	F5GX74	453	F5GX74;Q6VMQ6;G3V1U0;A8MV73	453;445;445;445	Activating transcription factor 7-interacting protein 1	ATF7IP;ATF7IP;ATF7IP;ATF7IP	S			0.51005	0.375401	-0.0316364	0.375401				1	0.0079295	58.09	0.999777	56.959	36.8677	788.834	-0.22529	METDEIIPILEKLAPSEDELTCFSKTSLLPI	_LAPS(ph)EDELTCFSK_	CaMKII_group	CAMK2A	0.122	0.1721	1.5489					BARD1 BRCT domain binding motif;Casein kinase II substrate motif;DNA dependent Protein kinase substrate motif;G protein-coupled receptor kinase 1 substrate motif;PKA kinase substrate motif
F5GX74	121	F5GX74	121	F5GX74;Q6VMQ6;G3V1U0;A8MV73;F5H1K9;F5H502;F5GZ10;F5H2H9;F5H2W9;F5H8I0;F8WE35	121;113;113;113;113;113;113;113;113;113;113	Activating transcription factor 7-interacting protein 1	ATF7IP;ATF7IP;ATF7IP;ATF7IP;ATF7IP;ATF7IP;ATF7IP;ATF7IP;ATF7IP;ATF7IP;ATF7IP	S			-0.254169	-0.000317429	0.186627	-0.0527752				1	4.59e-10	119.42	0.999899	119.42	40.0176	943.092	-0.68568	NVKNKQDDDLNCEPLSPHNITPEPVSKLPAE	_NKQDDDLNCEPLS(ph)PHNITPEPVSK_	MAPK3_MAPK1_MAPK7_NLK_group	MAPK1;MAPK3	0.2954	0.30295	1.8269					Casein kinase I substrate motif;ERK1,2 kinase substrate motif;GSK-3, ERK1, ERK2, CDK5 substrate motif;WW domain binding motif
F5GX82	479	F5GX82	479	F5GX82;O94915;F2Z2S2;D6RJI4	479;479;479;185	Protein furry homolog-like	FRYL;FRYL;FRYL;FRYL	S			-0.387902		-0.273448	-0.330683				1	5.58e-06	111.4	0.596604	62.677	1.73365	1074.51	-0.31026	KDGEPPMPTTGVILPSGNTLRVKKIFLNKTL	_DGEPPM(ox)PTTGVILPS(ph)GNTLR_										Casein kinase I substrate motif;Casein kinase II substrate motif;DNA dependent Protein kinase substrate motif
F5GX82	1971	F5GX82	1971	F5GX82;O94915;H0Y9X0	1971;1971;841	Protein furry homolog-like	FRYL;FRYL;FRYL	S					-0.0355201	-0.03552				1	0.0109797	75.739	0.599305	75.739	2.27278	533.24	0.1321	RSNTLDIMDGRINHSSSLARTRSLSSLREKG	_IN(de)HSS(ph)SLAR_	PAK_group	PAK1	0.1779	0.0874	1.3191					MDC1 BRCT domain binding motif;Plk1 PBD domain binding motif
F5GX82	1972	F5GX82	1972	F5GX82;O94915;H0Y9X0	1972;1972;842	Protein furry homolog-like	FRYL;FRYL;FRYL	S			-0.0996954	-0.288769	-0.556224	-0.288769				1	0.00402956	87.719	0.624073	87.719	4.53719	533.24	-0.045424	SNTLDIMDGRINHSSSLARTRSLSSLREKGM	_IN(de)HSSS(ph)LAR_	PKC_group	PRKCA;PRKCB;PRKCZ	0.2897	0.1425	1.3626					G protein-coupled receptor kinase 1 substrate motif;MDC1 BRCT domain binding motif;Plk1 PBD domain binding motif
F5GX82	1957	F5GX82	1957	F5GX82;O94915;H0Y9X0	1957;1957;827	Protein furry homolog-like	FRYL;FRYL;FRYL	S			0.177854			0.177854				1	0.000998121	82.925	0.789184	82.925	5.73274	601.25	0.52083	LRLSLIGDRRGDRRRSNTLDIMDGRINHSSS	_S(ph)NTLDIMDGR_	PAK_group;PKA_group	PAK1;PRKACA	0.2404	0.10625	1.34015					14-3-3 domain binding motif;Calmodulin-dependent protein kinase II substrate motif;Casein kinase II substrate motif;PAK2 kinase substrate motif;PKA kinase substrate motif;PKA, PKG kinase substrate motif;PKC epsilon kinase substrate motif;PKC kinase substrate motif;PKG kinase substrate motif
F5GX82	1978	F5GX82	1978	F5GX82;O94915;H0Y9X0;Q70YC5;C9J1G1	1978;1978;848;39;39	Protein furry homolog-like;Protein ZNF365	FRYL;FRYL;FRYL;ZNF365;ZNF365	S			0.0756011	-0.17093	0.123401	0.0926134				1	0.00462533	77.282	0.995295	77.282	23.5282	371.678	-0.53538	MDGRINHSSSLARTRSLSSLREKGMYDVQST	_S(ph)LSSLR_	CaMKII_group;PAK_group	CAMK2A;PAK1	0.17305	0.1027	1.6317					14-3-3 domain binding motif;Calmodulin-dependent protein kinase I substrate motif;Calmodulin-dependent protein kinase II alpha substrate motif;Calmodulin-dependent protein kinase II substrate motif;Calmodulin-dependent protein kinase IV substrate motif;Casein kinase I substrate motif;Casein kinase II substrate motif;Chk1 kinase substrate motif;Phosphorylase kinase substrate motif;PKA kinase subst…
F5GX82	2272	F5GX82	2272	F5GX82;O94915;H0Y9X0	2272;2272;1142	Protein furry homolog-like	FRYL;FRYL;FRYL	S			0.445621			0.445621				1	0.000227974	91.589	0.92758	64.249	12.4298	820.348	0.22381	VVPSDIPKTYGGDTGSPEISFTKIFNNVSKE	_TYGGDTGS(ph)PEISFTK_	CK1_group	CSNK1A1	0.1408	0.0824	1.3564					Casein kinase I substrate motif;Casein kinase II substrate motif;ERK1,2 kinase substrate motif;G protein-coupled receptor kinase 1 substrate motif;GSK3 kinase substrate motif;GSK-3, ERK1, ERK2, CDK5 substrate motif;WW domain binding motif
F5GX82	1959	F5GX82	1959	F5GX82;O94915;H0Y9X0	1959;1959;829	Protein furry homolog-like	FRYL;FRYL;FRYL	T			-0.0829732	-0.00306179	-0.0536434	-0.0675759				1	1.03e-29	208.66	0.999972	122.66	45.4576	609.247	0.38374	LSLIGDRRGDRRRSNTLDIMDGRINHSSSLA	_SNT(ph)LDIM(ox)DGR_	CaMKII_group;PAK_group	CAMK2A;PAK1	0.1754	0.1027	1.6317					Akt kinase substrate motif;Calmodulin-dependent protein kinase II substrate motif;p70 Ribosomal S6 kinase substrate motif;PKC kinase substrate motif
F5GXD7	4	F5GXD7	4	F5GXD7;M0R0E8	4;4		ZNF791	S			0.482642			0.482642				1	0.0148321	45.137	0.504609	45.137	0.114499	477.742	0.78857	____________MRLSSLTRHMRSHTGYELF	_(ac)RLS(ph)SLTR_										Casein kinase I substrate motif;Casein kinase II substrate motif;PKA kinase substrate motif;PKC kinase substrate motif
F5GXD7	5	F5GXD7	5	F5GXD7;M0R0E8	5;5		ZNF791	S				0.291014	0.227371	0.259182				1	0.00595193	61.78	0.952585	61.78	13.3561	477.742	-0.28214	___________MRLSSLTRHMRSHTGYELFE	_(ac)RLSS(ph)LTR_										14-3-3 domain binding motif;Calmodulin-dependent protein kinase II substrate motif;Casein kinase II substrate motif;CLK1 kinase substrate motif;MDC1 BRCT domain binding motif;Phosphorylase kinase substrate motif;PKA kinase substrate motif;PKC kinase substrate motif;Plk1 PBD domain binding motif
F5GXR3	2	F5GXR3	2	F5GXR3;P20962;F5H7R9	2;2;2	Parathymosin	PTMS;PTMS;PTMS	S			-0.370303		-0.465201	-0.417752				1	1.39e-30	195.46	0.99999	147.17	50.0737	771.358	0.85444	______________MSEKSVEAAAELSAKDL	_(ac)S(ph)EKSVEAAAELSAK_										Casein kinase I substrate motif;Casein kinase II substrate motif;G protein-coupled receptor kinase 1 substrate motif;PKA kinase substrate motif;PKC kinase substrate motif
F5GY88	881	F5GY88	881	F5GY88;O75448;H0YEG1	881;862;38	Mediator of RNA polymerase II transcription subunit 24	MED24;MED24;MED24	S			0.523963	0.399007	0.43776	0.414785				1	8.99e-82	246.39	0.969478	246.39	15.0192	1013.95	-0.21145	FPLDDVQPSKLMRLLSSNEDDANILSSPTDR	_LLS(ph)SNEDDANILSSPTDR_	CaMKII_group;PAK_group	CAMK2A;PAK1	0.1268	0.30365	1.61515					14-3-3 domain binding motif;Calmodulin-dependent protein kinase II substrate motif;Calmodulin-dependent protein kinase IV substrate motif;Casein kinase II substrate motif;Chk1 kinase substrate motif;PKA kinase substrate motif;PKC kinase substrate motif
F5GY88	882	F5GY88	882	F5GY88;O75448;H0YEG1	882;863;39	Mediator of RNA polymerase II transcription subunit 24	MED24;MED24;MED24	S			0.0976109	0.037312		0.067501				1	0.000143281	87.319	0.5	87.319	0	676.304	-1.3223	PLDDVQPSKLMRLLSSNEDDANILSSPTDRS	_LLS(ph)SNEDDANILSSPTDR_										Casein kinase II substrate motif;MDC1 BRCT domain binding motif;Plk1 PBD domain binding motif;Pyruvate dehydrogenase kinase substrate motif
F5GY88	892	F5GY88	892	F5GY88;O75448;H0YEG1	892;873;49	Mediator of RNA polymerase II transcription subunit 24	MED24;MED24;MED24	S			-0.510889	0.167358	-0.333262	-0.171742				1	3.37e-134	298.23	0.958583	298.23	15.3665	1013.95	-0.15466	MRLLSSNEDDANILSSPTDRSMSSSLSASQL	_LLSSNEDDANILSS(ph)PTDR_	CDK2_CDK3_CDK1_CDK5_group	CDK2	0.256	0.4139	1.2492					Casein kinase II substrate motif;ERK1,2 kinase substrate motif;GSK-3, ERK1, ERK2, CDK5 substrate motif;MDC1 BRCT domain binding motif;Plk1 PBD domain binding motif;Pyruvate dehydrogenase kinase substrate motif;WW domain binding motif
F5GYR8	951	F5GYR8	951	F5GYR8;O60763;F5H4X1;H0Y7C0	951;942;927;618	General vesicular transport factor p115	USO1;USO1;USO1;USO1	S			-0.258391	-0.102791	-0.211782	-0.18917	0.173767	-0.0377545		0.884407	8.69e-16	103.95	0.999964	103.95	44.4717	1040.18	-1.1036	LKDLGHPVEEEDELESGDQEDEDDESEDPGK	_LKDLGHPVEEEDELES(ph)GDQEDEDDESEDPGKDLDHI_	CK1_group;CK2_group;MAPK3_MAPK1_MAPK7_NLK_group	CSNK1A1;CSNK2A1;MAPK3	0.1182	0.3572	1.5324					b-Adrenergic Receptor kinase substrate motif;Casein kinase I substrate motif
F5GYR8	961	F5GYR8	961	F5GYR8;O60763;F5H4X1;H0Y7C0	961;952;937;628	General vesicular transport factor p115	USO1;USO1;USO1;USO1	S					-0.0212333	-0.0212333	0.173767	-0.0377545		0.884407	0.00146942	47.159	0.5	47.159	0	1306.18	-0.99452	EDELESGDQEDEDDESEDPGKDLDHI_____	_DLGHPVEEEDELES(ph)GDQEDEDDESEDPGKDLDHI_	CK1_group;CK2_group	CSNK1A1;CSNK2A1	0.2509	0.3546	1.7986					b-Adrenergic Receptor kinase substrate motif;Casein kinase I substrate motif;G protein-coupled receptor kinase 1 substrate motif
F5H012	266	F5H012	266	F5H012;P19474	266;266	E3 ubiquitin-protein ligase TRIM21	TRIM21;TRIM21	S			0.0469799	-0.197881	-0.175273	-0.104387				1	0.00166406	79.466	0.799236	79.466	5.99989	619.787	0.098083	GPRSESWNLKDLDITSPELRSVCHVPGLKKM	_DLDITS(ph)PELR_	CDK2_CDK3_CDK1_CDK5_group	CDK2	0.2143	0.4442	1.1713					Casein kinase I substrate motif;Casein kinase II substrate motif;ERK1,2 kinase substrate motif;GSK-3, ERK1, ERK2, CDK5 substrate motif;WW domain binding motif
F5H039	349	F5H039	349	F5H039;Q9NQX3;F8W7D6;G3V582;H0YJ30	349;303;272;318;255	Gephyrin;Molybdopterin adenylyltransferase;Molybdopterin molybdenumtransferase	GPHN;GPHN;GPHN;GPHN;GPHN	S					0.234379	0.234379				1	1.33e-05	112.82	0.705415	112.82	3.79234	554.755	-0.2271	EVQSRCSSKENILRASHSAVDITKVARRHRM	_AS(ph)HSAVDITK_	PAK_group;PKGcGK_group	PAK1;PRKG1	0.0928	0.40315	1.367					Casein kinase II substrate motif;PKA kinase substrate motif;PKC kinase substrate motif
F5H039	201	F5H039	201	F5H039;Q9NQX3;F8W7D6;G3V582;H0YJ30	201;188;157;170;121	Gephyrin;Molybdopterin adenylyltransferase;Molybdopterin molybdenumtransferase	GPHN;GPHN;GPHN;GPHN;GPHN	S			-0.0891138	-0.195451	-0.190141	-0.104186				1	0.00296632	45.407	0.996617	45.407	28.9303	800.879	0.25624	IVKVKEVHDELEDLPSPPPPLSPPPTTSPHK	_VKEVHDELEDLPS(ph)PPPPLS(ph)PPPTTSPHK_	CK1_group;MAPK3_MAPK1_MAPK7_NLK_group	CSNK1A1;MAPK1;MAPK3	0.3129	0.3111	1.764					Casein kinase I substrate motif;DNA dependent Protein kinase substrate motif;ERK1,2 kinase substrate motif;G protein-coupled receptor kinase 1 substrate motif;GSK-3, ERK1, ERK2, CDK5 substrate motif;WW domain binding motif
F5H039	207	F5H039	207	F5H039;Q9NQX3;F8W7D6;G3V582;H0YJ30	207;194;163;176;127	Gephyrin;Molybdopterin adenylyltransferase;Molybdopterin molybdenumtransferase	GPHN;GPHN;GPHN;GPHN;GPHN	S			-0.0891138	-0.195451	-0.190141	-0.104186				1	0.00296632	45.407	0.942941	45.407	16.0222	800.879	0.25624	VHDELEDLPSPPPPLSPPPTTSPHKQTEDKG	_VKEVHDELEDLPS(ph)PPPPLS(ph)PPPTTSPHK_	MAPK3_MAPK1_MAPK7_NLK_group	MAPK1;MAPK3	0.3287	0.31195	1.82995					Casein kinase I substrate motif;ERK1,2 kinase substrate motif;G protein-coupled receptor kinase 1 substrate motif;GSK-3, ERK1, ERK2, CDK5 substrate motif;WW domain binding motif
F5H0B0	176	F5H0B0	176	F5H0B0;P55327;E5RK35	176;176;12	Tumor protein D52	TPD52;TPD52;TPD52	S			-0.40255	0.519542	-0.567725	-0.136299				1	1.19e-28	173.98	1	120.84	120.838	652.295	1.4794	ITKKLEDVKNSPTFKSFEEKVENLKGSPKNV	_S(ph)FEEKVEN(de)LK_	PKC_group	PRKCB	0.1146	0.1429	1.0658					Casein kinase II substrate motif
F5H0X3	487	F5H0X3	487	F5H0X3;J3KPU3;Q9ULU4;Q2HXV3;H7C0U2;H7C4X9;Q2HXV1;B7ZM62	487;460;460;455;397;387;455;455	Protein kinase C-binding protein 1	ZMYND8;ZMYND8;ZMYND8;ZMYND8;ZMYND8;ZMYND8;ZMYND8	S										1	0.000553701	36.096	0.48661	36.096	3.61466	690.278	-0.63081	DVEQDAEKKATSSHFSASEESMDFLDKSTAS	_ATSSHFS(ph)ASEESMDFLDK_	CK1_group;GRK_group	CSNK1A1;GRK4	0.08075	0.39025	1.996					Casein kinase II substrate motif;MAPKAPK2 kinase substrate motif
F5H0X3	695	F5H0X3	695	F5H0X3;J3KPU3;Q9ULU4;Q2HXV3;H7C0U2;H7C4X9;Q2HXV1;B7ZM62	695;668;668;663;605;595;616;663	Protein kinase C-binding protein 1	ZMYND8;ZMYND8;ZMYND8;ZMYND8;ZMYND8;ZMYND8;ZMYND8	S			-0.0348696	-0.0850988	0.0709388	-0.0146599				1	9.67e-85	267.39	1	262.37	93.9545	843.867	-0.77277	PASEKADPGAVKDKASPEPEKDFSEKAKPSP	_DKAS(ph)PEPEKDFSEK_	DNAPK;GRK_group	GRK4;HYRC	0.0372	0.59	2.02395					Casein kinase I substrate motif;Casein kinase II substrate motif;ERK1,2 kinase substrate motif;GSK-3, ERK1, ERK2, CDK5 substrate motif;PKA kinase substrate motif;PKC kinase substrate motif;WW domain binding motif
F5H0X3	574	F5H0X3	574	F5H0X3;J3KPU3;Q9ULU4;Q2HXV3;H7C0U2;H7C4X9;Q2HXV1;B7ZM62	574;547;547;542;484;474;495;542	Protein kinase C-binding protein 1	ZMYND8;ZMYND8;ZMYND8;ZMYND8;ZMYND8;ZMYND8;ZMYND8	S	+		0.674099	0.550014	0.638862	0.672471				1	5.01e-16	157.83	0.999998	95.138	57.7654	1074.04	0.38125	LSESVQQQSTPVPLISPKRQIRSRFQLNLDK	_ELSESVQQQSTPVPLIS(ph)PK_	DNAPK;MAPK3_MAPK1_MAPK7_NLK_group;PKC_group	HYRC;MAPK3;PRKCB	0.1183	0.537	1.588					Cdc2 kinase substrate motif;CDK kinase substrate motif;CDK1,2,4,6 kinase substrate motif;ERK1,2 kinase substrate motif;Growth associated histone HI kinase substrate motif;GSK-3, ERK1, ERK2, CDK5 substrate motif;PKA kinase substrate motif;PKC kinase substrate motif;WW domain binding motif
F5H0X3	433	F5H0X3	433	F5H0X3;J3KPU3;Q9ULU4;Q2HXV3;H7C0U2;H7C4X9;Q2HXV1;B7ZM62	433;406;406;401;343;333;401;401	Protein kinase C-binding protein 1	ZMYND8;ZMYND8;ZMYND8;ZMYND8;ZMYND8;ZMYND8;ZMYND8	S			0.429428	0.489543	0.368601	0.424277				1	2.05e-13	151.11	0.99886	96.135	29.4275	610.257	0.16847	IDKQEKVKLNFDMTASPKILMSKPVLSGGTG	_LNFDM(ox)TAS(ph)PK_	DNAPK;GRK_group	GRK4;HYRC	0.0763	0.59	2.89125					ERK1,2 kinase substrate motif;Growth associated histone HI kinase substrate motif;GSK-3, ERK1, ERK2, CDK5 substrate motif;PKA kinase substrate motif;PKC kinase substrate motif;WW domain binding motif
F5H0X3	452	F5H0X3	452	F5H0X3;J3KPU3;Q9ULU4;Q2HXV3;H7C0U2;H7C4X9;Q2HXV1;B7ZM62	452;425;425;420;362;352;420;420	Protein kinase C-binding protein 1	ZMYND8;ZMYND8;ZMYND8;ZMYND8;ZMYND8;ZMYND8;ZMYND8	S			0.211012		-0.00630393	0.191815				1	1.43e-08	124.21	0.99968	124.21	34.9406	577.773	-0.54114	LMSKPVLSGGTGRRISLSDMPRSPMSTNSSV	_RIS(ph)LSDMPR_	CaMKII_group;DNAPK;GRK_group;PAK_group;PKA_group	CAMK2A;GRK4;HYRC;PAK1;PRKACA	0.1495	0.2244	1.6111					14-3-3 domain binding motif;Aurora-A kinase substrate motif;Calmodulin-dependent protein kinase II substrate motif;Casein kinase II substrate motif;PAK2 kinase substrate motif;Phosphorylase kinase substrate motif;PKA kinase substrate motif;PKC epsilon kinase substrate motif;PKC kinase substrate motif;Pyruvate dehydrogenase kinase substrate motif
F5H0X3	679	F5H0X3	679	F5H0X3;J3KPU3;Q9ULU4;Q2HXV3;H7C0U2;H7C4X9;Q2HXV1;B7ZM62	679;652;652;647;589;579;600;647	Protein kinase C-binding protein 1	ZMYND8;ZMYND8;ZMYND8;ZMYND8;ZMYND8;ZMYND8;ZMYND8	S			-0.114223			-0.114223				1	0.00143293	64.87	0.914072	64.87	13.346	802.834	0.63292	KPTNPVEIKEELKSTSPASEKADPGAVKDKA	_STS(ph)PAS(ph)EKADPGAVK_										Casein kinase I substrate motif;Casein kinase II substrate motif;ERK1,2 kinase substrate motif;GSK-3, ERK1, ERK2, CDK5 substrate motif;PKA kinase substrate motif;PKC kinase substrate motif;WW domain binding motif
F5H0X3	682	F5H0X3	682	F5H0X3;J3KPU3;Q9ULU4;Q2HXV3;H7C0U2;H7C4X9;Q2HXV1;B7ZM62	682;655;655;650;592;582;603;650	Protein kinase C-binding protein 1	ZMYND8;ZMYND8;ZMYND8;ZMYND8;ZMYND8;ZMYND8;ZMYND8	S			-0.114223			-0.114223				1	0.00143293	64.87	0.993861	64.87	26.1344	802.834	0.63292	NPVEIKEELKSTSPASEKADPGAVKDKASPE	_STS(ph)PAS(ph)EKADPGAVK_	CK1_group;DNAPK;GRK_group;PKC_group	CSNK1A1;GRK4;HYRC;PRKCA;PRKCB	0.1196	0.537	1.5908					G protein-coupled receptor kinase 1 substrate motif;PKA kinase substrate motif;PKC kinase substrate motif
F5H0X3	513	F5H0X3	513	F5H0X3;J3KPU3;Q9ULU4;Q2HXV3;H7C0U2;H7C4X9;B7ZM62	513;486;486;481;423;413;481	Protein kinase C-binding protein 1	ZMYND8;ZMYND8;ZMYND8;ZMYND8;ZMYND8;ZMYND8	S			0.110363	-0.0515636	-0.0211747	-0.0318134				1	0.000202049	64.53	0.960292	64.53	13.2879	873.082	1.3936	KSTASPASTKTGQAGSLSGSPKPFSPQLSAP	_TGQAGS(ph)LS(ph)GSPKPFSPQLSAPITTK_	CK1_group;DNAPK;GRK_group;PKC_group	CSNK1A1;GRK4;HYRC;PRKCB	0.1209	0.578	1.3271					Casein kinase II substrate motif;G protein-coupled receptor kinase 1 substrate motif;GSK3 kinase substrate motif
F5H0X3	515	F5H0X3	515	F5H0X3;J3KPU3;Q9ULU4;Q2HXV3;H7C0U2;H7C4X9;B7ZM62	515;488;488;483;425;415;483	Protein kinase C-binding protein 1	ZMYND8;ZMYND8;ZMYND8;ZMYND8;ZMYND8;ZMYND8	S			-0.0424568	0.0543624		0.00590296				1	0.000202049	64.53	0.617436	64.53	1.92483	873.082	1.3936	TASPASTKTGQAGSLSGSPKPFSPQLSAPIT	_TGQAGS(ph)LS(ph)GSPKPFSPQLSAPITTK_	GRK_group;MAPK3_MAPK1_MAPK7_NLK_group	GRK4;MAPK1;MAPK3	0.3032	0.2295	1.8959					Casein kinase II substrate motif
F5H0X3	517	F5H0X3	517	F5H0X3;J3KPU3;Q9ULU4;Q2HXV3;H7C0U2;H7C4X9;B7ZM62	517;490;490;485;427;417;485	Protein kinase C-binding protein 1	ZMYND8;ZMYND8;ZMYND8;ZMYND8;ZMYND8;ZMYND8	S			0.167101	0.0374524	-0.0217311	0.0374525				1	1.3e-06	96.242	0.845204	96.242	8.52356	846.426	0.15121	SPASTKTGQAGSLSGSPKPFSPQLSAPITTK	_TGQAGSLSGS(ph)PKPFSPQLSAPITTK_	MAPK3_MAPK1_MAPK7_NLK_group	MAPK1;MAPK3	0.2852	0.22895	1.8269					ERK1,2 kinase substrate motif;Growth associated histone HI kinase substrate motif;GSK-3, ERK1, ERK2, CDK5 substrate motif;MAPKAPK2 kinase substrate motif;PKA kinase substrate motif;PKC kinase substrate motif;WW domain binding motif
F5H0X3	783	F5H0X3	783	F5H0X3;J3KPU3;Q9ULU4;Q2HXV3;H7C0U2;H7C4X9;Q2HXV1	783;756;756;751;693;683;704	Protein kinase C-binding protein 1	ZMYND8;ZMYND8;ZMYND8;ZMYND8;ZMYND8;ZMYND8	S			0.122076	0.0870554	0.115566	0.115566				1	2.21e-42	207.55	0.995881	207.55	24.1321	714.347	-0.036484	DVVGKTPPSTTVGSHSPPETPVLTRSSAQTS	_TPPSTTVGSHS(ph)PPETPVLTR_	MAPK3_MAPK1_MAPK7_NLK_group	MAPK1;MAPK3	0.2938	0.22895	1.8269					Casein kinase I substrate motif;Casein kinase II substrate motif;ERK1,2 kinase substrate motif;G protein-coupled receptor kinase 1 substrate motif;GSK-3, ERK1, ERK2, CDK5 substrate motif;WW domain binding motif
F5H0X3	431	F5H0X3	431	F5H0X3;J3KPU3;Q9ULU4;Q2HXV3;H7C0U2;H7C4X9;Q2HXV1;B7ZM62	431;404;404;399;341;331;399;399	Protein kinase C-binding protein 1	ZMYND8;ZMYND8;ZMYND8;ZMYND8;ZMYND8;ZMYND8;ZMYND8	T				0.151079		0.151079				1	0.00303862	71.685	0.63456	71.685	2.39657	723.839	-2.6789	AKIDKQEKVKLNFDMTASPKILMSKPVLSGG	_VKLNFDM(ox)T(ph)ASPK_	GRK_group	GRK4	0.1161	0.643	4.8232
F5H1J5	448	F5H1J5	448	F5H1J5;Q14141;B1AMS2;B4E049	448;418;418;360	Septin-6	SEPT6;SEPT6;SEPT6;SEPT6	T		+	-0.696704	-1.44132	-1.24694	-1.1592		0.739848	+	0.000115541	1.15e-42	209.16	0.954778	175.83	13.2455	780.395	-0.34774	AELLQSQGSQAGGSQTLKRDKEKKK______	_KTAAELLQSQGSQAGGSQT(ph)LKR_	PKC_group	PRKCA;PRKCB;PRKCZ	0.4611	0.1843	2.4948					PKA kinase substrate motif;PKC kinase substrate motif
F5H1U2	94	F5H1U2	94	F5H1U2;P78317;D6RA71	94;94;94	E3 ubiquitin-protein ligase RNF4	RNF4;RNF4;RNF4	S			-0.0570164	-0.020516	-0.119416	-0.0570164				1	8.48e-17	156.27	0.999997	156.27	57.4616	859.01	-0.55083	NARRLPQDHADSCVVSSDDEELSRDRDVYVT	_RLPQDHADSCVVS(ph)S(ph)DDEELSR_										Casein kinase II substrate motif;MAPKAPK2 kinase substrate motif;Pyruvate dehydrogenase kinase substrate motif
F5H1U2	95	F5H1U2	95	F5H1U2;P78317;D6RA71	95;95;95	E3 ubiquitin-protein ligase RNF4	RNF4;RNF4;RNF4	S			-0.0570164	-0.020516	-0.119416	-0.0570164				1	8.48e-17	156.27	0.999996	156.27	54.3414	859.01	-0.55083	ARRLPQDHADSCVVSSDDEELSRDRDVYVTT	_RLPQDHADSCVVS(ph)S(ph)DDEELSR_										BARD1 BRCT domain binding motif;Casein kinase II substrate motif;MDC1 BRCT domain binding motif;Plk1 PBD domain binding motif
F5H269	924	F5H269	924	F5H269;Q9Y485	924;924	DmX-like protein 1	DMXL1;DMXL1	S										1	0.0139003	51.092	0.997319	51.092	25.7061	500.249	-0.44223	WQPEEHYSSSPEKILSPFSQKYQACRANLQS	_ILS(ph)PFSQK_	MAPK3_MAPK1_MAPK7_NLK_group	MAPK1;MAPK3	0.2597	0.16585	1.67545					Casein kinase I substrate motif;Casein kinase II substrate motif;ERK1,2 kinase substrate motif;GSK-3, ERK1, ERK2, CDK5 substrate motif;PKA kinase substrate motif;PKC kinase substrate motif;WW domain binding motif
F5H269	1258	F5H269	1258	F5H269;Q9Y485	1258;1258	DmX-like protein 1	DMXL1;DMXL1	S			-0.00543473			-0.00543476				1	2.64e-05	95.123	0.823386	95.123	8.02051	1152.06	-1.6646	PSSKQEPVITDSYSGSTPSITSLIKQSNSSS	_QEPVITDSYSGS(ph)TPSITSLIK_	CK1_group	CSNK1A1	0.1336	0.1501	1.3564					Casein kinase I substrate motif;Casein kinase II substrate motif;MAPKAPK2 kinase substrate motif
F5H2M7	2525	F5H2M7	2525	F5H2M7;Q9H4A3;F5GWT4	2525;2027;1779	Serine/threonine-protein kinase WNK1	WNK1;WNK1;WNK1	S			0.52677	0.341303	0.45249	0.45249				1	0.000110206	89.365	0.659163	40.381	0.734088	1005.39	-0.21033	SDPEAAFLSRDVDDGSGSPHSPHQLSSKSLP	_DVDDGS(ph)GS(ph)PHSPHQLSSK_	CK1_group	CSNK1A1	0.132	0.1961	1.3564					Casein kinase I substrate motif;Casein kinase II substrate motif
F5H2M7	2527	F5H2M7	2527	F5H2M7;Q9H4A3;F5GWT4	2527;2029;1781	Serine/threonine-protein kinase WNK1	WNK1;WNK1;WNK1	S			0.429643	0.511974	0.683652	0.511974				1	1.63e-10	138.93	0.978212	138.93	16.5219	670.593	-0.062022	PEAAFLSRDVDDGSGSPHSPHQLSSKSLPSQ	_DVDDGSGS(ph)PHS(ph)PHQLSSK_	MAPK3_MAPK1_MAPK7_NLK_group	MAPK3	0.2119	0.2116	1.5552					Casein kinase I substrate motif;Casein kinase II substrate motif;ERK1,2 kinase substrate motif;G protein-coupled receptor kinase 1 substrate motif;GSK-3, ERK1, ERK2, CDK5 substrate motif;WW domain binding motif
F5H2M7	2530	F5H2M7	2530	F5H2M7;Q9H4A3;F5GWT4	2530;2032;1784	Serine/threonine-protein kinase WNK1	WNK1;WNK1;WNK1	S			0.429643	1.32193	0.683652	1.32193				1	1.63e-10	138.93	0.999806	138.93	38.6368	670.593	-0.062022	AFLSRDVDDGSGSPHSPHQLSSKSLPSQNLS	_DVDDGSGS(ph)PHS(ph)PHQLSSK_										ERK1,2 kinase substrate motif;GSK-3, ERK1, ERK2, CDK5 substrate motif;WW domain binding motif
F5H2M7	2347	F5H2M7	2347	F5H2M7;Q9H4A3;F5GWT4	2347;1849;1601	Serine/threonine-protein kinase WNK1	WNK1;WNK1;WNK1	S			-0.520459			-0.520459				1	0.000900553	75.55	0.738263	75.55	6.98242	750.361	1.6682	QKGVSQVKEGPVLATSSGAGVFKMGRFQVSV	_EGPVLATS(ph)SGAGVFK_
F5H2M7	2509	F5H2M7	2509	F5H2M7;Q9H4A3;F5GWT4	2509;2011;1763	Serine/threonine-protein kinase WNK1	WNK1;WNK1;WNK1	S				0.0281448		0.0281448				1	3.77e-06	85.19	0.550838	64.176	0.899747	925.427	1.3018	KEKPELSEPSHLNGPSSDPEAAFLSRDVDDG	_EKPELSEPSHLNGPS(ph)SDPEAAFLSR_	CaMKII_group	CAMK2A	0.1551	0.1819	1.9017					DNA dependent Protein kinase substrate motif
F5H2M7	2510	F5H2M7	2510	F5H2M7;Q9H4A3;F5GWT4	2510;2012;1764	Serine/threonine-protein kinase WNK1	WNK1;WNK1;WNK1	S			0.104605	-0.0784418		0.0130692				1	3.76e-37	189.11	0.912855	189.11	10.2042	925.427	1.147	EKPELSEPSHLNGPSSDPEAAFLSRDVDDGS	_EKPELSEPSHLNGPSS(ph)DPEAAFLSR_										Casein kinase II substrate motif;G protein-coupled receptor kinase 1 substrate motif;MDC1 BRCT domain binding motif;Plk1 PBD domain binding motif
F5H2M7	2870	F5H2M7	2870	F5H2M7;Q9H4A3;F5GWT4	2870;2372;2124	Serine/threonine-protein kinase WNK1	WNK1;WNK1;WNK1	S					0.372506	0.372506				1	1.24e-15	107.65	0.999992	107.65	51.0764	611.285	-0.0056072	ASLQNFNISNLQKSISNPPGSNLRTT_____	_SIS(ph)NPPGSNLR_										Calmodulin-dependent protein kinase II substrate motif;Chk1 kinase substrate motif;PKA kinase substrate motif;PKC kinase substrate motif
F5H2R7	392	F5H2R7	392	F5H2R7;Q9NQC7;J3KRR7	392;392;389	Ubiquitin carboxyl-terminal hydrolase CYLD	CYLD;CYLD	S										1	0.000171587	60.181	0.273023	60.181	0	1093.52	1.518	IDEVAEDPAKSLTEISTDFDRSSPPLQPPPV	_SLTEIS(ph)TDFDRSSPPLQPPPVNSLTTENR_	CaMKII_group;CK1_group;IKKalpha_IKKbeta_group	CAMK2A;CAMK2D;CHUK;CSNK1A1;CSNK1D;IKBKB	0.0824	0.47235	1.785
F5H2R7	398	F5H2R7	398	F5H2R7;Q9NQC7;J3KRR7	398;398;395	Ubiquitin carboxyl-terminal hydrolase CYLD	CYLD;CYLD	S										1	0.000109515	63.323	0.325451	63.323	0	1093.52	-0.20842	DPAKSLTEISTDFDRSSPPLQPPPVNSLTTE	_SLTEISTDFDRS(ph)SPPLQPPPVNSLTTENR_	CK1_group;IKKalpha_IKKbeta_group	CHUK;CSNK1D;IKBKB	0.0219	0.54	1.3683
F5H2R7	399	F5H2R7	399	F5H2R7;Q9NQC7;J3KRR7	399;399;396	Ubiquitin carboxyl-terminal hydrolase CYLD	CYLD;CYLD	S										1	0.000109515	63.323	0.325451	63.323	0	1093.52	-0.20842	PAKSLTEISTDFDRSSPPLQPPPVNSLTTEN	_SLTEISTDFDRS(ph)SPPLQPPPVNSLTTENR_	CDK2_CDK3_CDK1_CDK5_group;CK1_group;IKKalpha_IKKbeta_group;MAPK3_MAPK1_MAPK7_NLK_group	CDK1;CSNK1A1;CSNK1D;IKBKB;MAPK3	0.123	0.4047	1.757					Casein kinase I substrate motif;ERK1,2 kinase substrate motif;GSK-3, ERK1, ERK2, CDK5 substrate motif;MDC1 BRCT domain binding motif;PKA kinase substrate motif;PKC kinase substrate motif;Plk1 PBD domain binding motif;WW domain binding motif
F5H2R7	393	F5H2R7	393	F5H2R7;Q9NQC7;J3KRR7	393;393;390	Ubiquitin carboxyl-terminal hydrolase CYLD	CYLD;CYLD	T										1	0.000171587	60.181	0.273023	60.181	0	1093.52	1.518	DEVAEDPAKSLTEISTDFDRSSPPLQPPPVN	_SLTEIS(ph)TDFDRSSPPLQPPPVNSLTTENR_	CK1_group;TTK	CSNK1D;TTK	0.06	0.3635	1.6363					Casein kinase I substrate motif;Casein kinase II substrate motif;MDC1 BRCT domain binding motif;Plk1 PBD domain binding motif
F5H2X7	864	F5H2X7	864	F5H2X7;Q9ULV3;Q5SYW2;H0Y5D5	864;838;810;760	Cip1-interacting zinc finger protein	CIZ1;CIZ1;CIZ1;CIZ1	S			0.0651587	0.054779	-0.0341603	0.0250288				1	0.000310653	86.288	0.999829	86.288	37.7555	646.311	0.87709	GHFENLQKYKAAKNPSPTTRPVSRRCAINAR	_NPS(ph)PTTRPVSR_	CDK2_CDK3_CDK1_CDK5_group;MAPK3_MAPK1_MAPK7_NLK_group	CDK2;MAPK3	0.23605	0.52	7.7819					Casein kinase I substrate motif;Casein kinase II substrate motif;DNA dependent Protein kinase substrate motif;ERK1,2 kinase substrate motif;GSK-3, ERK1, ERK2, CDK5 substrate motif;PKA kinase substrate motif;PKC kinase substrate motif;WW domain binding motif
F5H4G7	3	F5H4G7;O15131	3;3	F5H4G7;Q5TD90;O15131	3;3;3	Importin subunit alpha;Importin subunit alpha-6	KPNA6;KPNA5;KPNA5	S			0.776104	0.471448		0.514097				1	3.55e-06	140.09	1	140.09	129.564	565.237	0.27726	_____________MASPGKDNYRMKSYKNKA;_____________MASPGKDNYRMKSYKNNA	_(ac)AS(ph)PGKDNYR_										Cdc2 kinase substrate motif;Cdc2 kinase substrate motif;CDK kinase substrate motif;CDK kinase substrate motif;CDK1,2,4,6 kinase substrate motif;CDK1,2,4,6 kinase substrate motif;ERK1,2 kinase substrate motif;ERK1,2 kinase substrate motif;GSK-3, ERK1, ERK2, CDK5 substrate motif;GSK-3, ERK1, ERK2, CDK5 substrate motif;WW domain binding motif;WW domain binding motif
F5H4R0	102	F5H4R0	102	F5H4R0;O60447	102;102	Ecotropic viral integration site 5 protein homolog	EVI5;EVI5	S			-0.900961			-0.900961				1	0.00616993	66.708	0.590993	66.708	2.74187	621.31	2.2029	AKLEEQNRLLETDSKSLRSVNGSRRNSGSSL	_LLETDSKS(ph)LR_	CK1_group;PKC_group	CSNK1A1;PRKCA;PRKCB;PRKCZ	0.389	0.18925	1.89085					Casein kinase I substrate motif;Casein kinase II substrate motif;PKA kinase substrate motif;PKC kinase substrate motif
F5H4T9	364	F5H4T9	364	F5H4T9;Q9NQQ7;Q5JW02	364;335;202	Solute carrier family 35 member C2	SLC35C2;SLC35C2;SLC35C2	S			0.0848807	0.0652966	-0.0023102	0.00748258		-0.524002		0.0263415	1.09e-38	212.39	0.989997	121.31	19.955	725.371	0.65445	HSRGDGGPKALKGLGSSPDLELLLRSSQREE	_GLGS(ph)SPDLELLLR_										AMP-activated protein kinase substrate motif;Casein kinase II substrate motif;PKA kinase substrate motif;Pyruvate dehydrogenase kinase substrate motif
F5H4T9	365	F5H4T9	365	F5H4T9;Q9NQQ7;Q5JW02	365;336;203	Solute carrier family 35 member C2	SLC35C2;SLC35C2;SLC35C2	S			-0.229551	0.0652966		-0.0821024		-0.524002		0.0263415	0.00415136	62.14	0.5	62.14	0	725.371	-0.32075	SRGDGGPKALKGLGSSPDLELLLRSSQREEG	_GLGS(ph)SPDLELLLR_										ERK1,2 kinase substrate motif;GSK-3, ERK1, ERK2, CDK5 substrate motif;MDC1 BRCT domain binding motif;Plk1 PBD domain binding motif;WW domain binding motif
F5H527	514	F5H527	514	F5H527;Q76I76	514;487	Protein phosphatase Slingshot homolog 2	SSH2;SSH2	S			0.0731348	0.0392789	0.419647	0.0392788				1	3.9e-22	147.12	0.925779	107.5	11.0068	735.84	0.022853	ICKPGLELNKKDITTSADQIAEVKTMESHPP	_DITTS(ph)ADQIAEVK_
F5H527	1243	F5H527	1243	F5H527;Q76I76;K7EKN7	1243;1216;7	Protein phosphatase Slingshot homolog 2	SSH2;SSH2	S										1	0.000495449	84.365	0.330112	84.365	0	639.79	1.2474	EKMDPLPVACRLPHSSSSENIKSLSHSPGVV	_LPHSS(ph)SSENIK_	PAK_group	PAK1	0.1491	0.4487	1.7784					Casein kinase II substrate motif;MDC1 BRCT domain binding motif;Plk1 PBD domain binding motif
F5H527	1244	F5H527	1244	F5H527;Q76I76;K7EKN7	1244;1217;8	Protein phosphatase Slingshot homolog 2	SSH2;SSH2	S			0.0507454	0.207143		0.128953				1	6.84e-08	142.38	0.74616	142.38	7.69887	639.79	-0.16971	KMDPLPVACRLPHSSSSENIKSLSHSPGVVK	_LPHSSS(ph)SENIK_										Casein kinase II substrate motif;MDC1 BRCT domain binding motif;Plk1 PBD domain binding motif
F5H527	1245	F5H527	1245	F5H527;Q76I76;K7EKN7	1245;1218;9	Protein phosphatase Slingshot homolog 2	SSH2;SSH2	S										1	1.05e-07	139.48	0.423882	139.48	0	639.79	-0.79747	MDPLPVACRLPHSSSSENIKSLSHSPGVVKE	_LPHSSS(ph)SENIK_	CK1_group;PKC_group	CSNK1A1;PRKCA;PRKCB	0.1709	0.2045	1.0398					G protein-coupled receptor kinase 1 substrate motif;MDC1 BRCT domain binding motif;Plk1 PBD domain binding motif
F5H5J4	83	F5H5J4	83	F5H5J4	83		LDHA	S			-0.0152138	-0.0304719	0.00633396	-0.0075796				1	0.0129653	63.565	1	37.646	37.6456	464.705	-0.056288	GSLFLRTPKIVSGKDSAPRFRD_________	_DS(ph)APRFR_	MAPK3_MAPK1_MAPK7_NLK_group;PKC_group;PKGcGK_group	MAPK3;PRKCB;PRKG1	0.1276	0.3999	1.2704					b-Adrenergic Receptor kinase substrate motif;MAPKAPK2 kinase substrate motif;PKA kinase substrate motif;PKC kinase substrate motif
F5H5P2	371	F5H5P2	371	F5H5P2;B4DP47;P12694;F5GXU9	371;340;337;308	2-oxoisovalerate dehydrogenase subunit alpha, mitochondrial	BCKDHA;BCKDHA;BCKDHA	S			-0.0873501	0.124857	0.465818	0.180021				1	6.65e-17	152.37	0.988153	125.89	19.7061	806.823	-0.12994	QPFLIEAMTYRIGHHSTSDDSSAYRSVDEVN	_IGHHS(ph)TSDDSSAYR_	PAK_group;PDHK_group	BCKDK;PAK1	0.1399	0.5746	5.0204					Branched chain alpha-ketoacid dehydrogenase kinase substrate motif;Casein kinase II substrate motif;Pyruvate dehydrogenase kinase substrate motif
F5H604	1223	F5H604	1223	F5H604;O75122;J3KR49;E3W994;E9PBA6;E7EW49;E7ERI8;F5H3X0;H7C4X8	1223;1012;1011;991;713;1232;1231;1001;34	CLIP-associating protein 2	CLASP2;CLASP2;CLASP2;CLASP2;CLASP2;CLASP2;CLASP2;CLASP2	S			-0.302475			-0.302475				1	1.16e-16	136.36	0.894625	136.36	9.93905	534.248	-3.1569	ALDNKASLLHSMPTHSSPRSRDYNPYNYSDS	_ASLLHSMPTHS(ph)SPR_	GSK3_group;NEK1_NEK5_NEK3_NEK4_NEK11_NEK2_group;PAK_group;PKC_group;TTK	GSK3A;GSK3B;NEK1;PAK1;PRKCB;TTK	0.0981	0.51175	2.49675					G protein-coupled receptor kinase 1 substrate motif;GSK3 kinase substrate motif
F5H604	1224	F5H604	1224	F5H604;O75122;J3KR49;E3W994;E9PBA6;E7EW49;E7ERI8;F5H3X0;H7C4X8	1224;1013;1012;992;714;1233;1232;1002;35	CLIP-associating protein 2	CLASP2;CLASP2;CLASP2;CLASP2;CLASP2;CLASP2;CLASP2;CLASP2	S			-0.232684			-0.232684				1	5.13e-17	155.03	0.929082	121.51	11.1745	534.248	-1.5305	LDNKASLLHSMPTHSSPRSRDYNPYNYSDSI	_ASLLHSMPTHSS(ph)PR_	CDK2_CDK3_CDK1_CDK5_group;CK1_group;GSK3_group;NEK1_NEK5_NEK3_NEK4_NEK11_NEK2_group	CDK1;CDK2;CDK5;CSNK1D;GSK3A;GSK3B;NEK1	0.0498	0.4476	2.6257					Casein kinase I substrate motif;Casein kinase II substrate motif;ERK1,2 kinase substrate motif;Growth associated histone HI kinase substrate motif;GSK-3, ERK1, ERK2, CDK5 substrate motif;MDC1 BRCT domain binding motif;PKA kinase substrate motif;PKC kinase substrate motif;Plk1 PBD domain binding motif;WW domain binding motif
F5H604	241	F5H604	241	F5H604;O75122;J3KR49;E3W994;E7EW49;E7ERI8	241;8;8;8;241;241	CLIP-associating protein 2	CLASP2;CLASP2;CLASP2;CLASP2;CLASP2	S			0.299245	0.881743		0.590434				1	5.61e-08	112.9	0.999997	112.9	55.9906	847.026	0.10876	VQSSGGMILSVCKDKSFDDEESVDGNRPSSA	_DKS(ph)FDDEESVDGNRPSSAASAFK_	CaMKII_group;NEK1_NEK5_NEK3_NEK4_NEK11_NEK2_group;PKC_group;TTK	CAMK2A;NEK1;PRKCA;PRKCB;TTK	0.111	0.3251	1.4054					Calmodulin-dependent protein kinase II substrate motif;Casein kinase II substrate motif;Chk1 kinase substrate motif;PKA kinase substrate motif;PKC kinase substrate motif;Pyruvate dehydrogenase kinase substrate motif
F5H604	1163	F5H604	1163	F5H604;O75122;J3KR49;E3W994;E9PBA6;E7EW49;E7ERI8;F5H3X0	1163;952;951;931;653;1172;1171;941	CLIP-associating protein 2	CLASP2;CLASP2;CLASP2;CLASP2;CLASP2;CLASP2;CLASP2	S			1.86033		0.135404	0.997834				1	0.00307585	59.634	0.999937	59.634	42.0055	724.832	0.19011	IYSSLRGVTEAIQNFSFRSQEDMNEPLKRDS	_GVTEAIQNFS(ph)FR_	NEK1_NEK5_NEK3_NEK4_NEK11_NEK2_group;PKC_group	NEK1;PRKCA;PRKCB;PRKCZ	0.4252	0.32485	2.59125					Casein kinase I substrate motif;Casein kinase II substrate motif;PKA kinase substrate motif;PKC kinase substrate motif
F5H604	796	F5H604	796	F5H604;O75122;J3KR49;E3W994;E9PBA6;E7EW49;E7ERI8;F5H3X0;H7C4M5	796;584;584;563;285;797;796;566;87	CLIP-associating protein 2	CLASP2;CLASP2;CLASP2;CLASP2;CLASP2;CLASP2;CLASP2;CLASP2	S			0.397036	-0.243472	0.0280033	0.0280033				1	0.00360439	75.819	0.690991	75.819	3.52897	517.223	-0.023657	PLGPGYGISQSSRLSSSVSAMRVLNTGSDVE	_LSS(ph)SVSAM(ox)R_	CaMKII_group;NEK1_NEK5_NEK3_NEK4_NEK11_NEK2_group;PAK_group	CAMK2A;NEK1;PAK1	0.1241	0.3915	1.5853					14-3-3 domain binding motif;Calmodulin-dependent protein kinase II substrate motif;Casein kinase I substrate motif;Casein kinase II substrate motif;G protein-coupled receptor kinase 1 substrate motif;MAPKAPK2 kinase substrate motif;MDC1 BRCT domain binding motif;PKA kinase substrate motif;PKC kinase substrate motif;Plk1 PBD domain binding motif
F5H604	797	F5H604	797	F5H604;O75122;J3KR49;E3W994;E9PBA6;E7EW49;E7ERI8;F5H3X0;H7C4M5	797;585;585;564;286;798;797;567;88	CLIP-associating protein 2	CLASP2;CLASP2;CLASP2;CLASP2;CLASP2;CLASP2;CLASP2;CLASP2	S				-0.170979		-0.170979				1	0.0114263	60.301	0.655113	60.301	3.75061	517.223	-0.055041	LGPGYGISQSSRLSSSVSAMRVLNTGSDVEE	_LSSS(ph)VSAM(ox)R_	CK1_group;GSK3_group;NEK1_NEK5_NEK3_NEK4_NEK11_NEK2_group;PAK_group;PKC_group;TTK	CSNK1D;GSK3A;GSK3B;NEK1;PAK1;PRKCB;TTK	0.0545	0.4331	1.6931					Casein kinase II substrate motif;MDC1 BRCT domain binding motif;Plk1 PBD domain binding motif
F5H604	1166	F5H604	1166	F5H604;O75122;J3KR49;E3W994;E9PBA6;E7EW49;E7ERI8;F5H3X0	1166;955;954;934;656;1175;1174;944	CLIP-associating protein 2	CLASP2;CLASP2;CLASP2;CLASP2;CLASP2;CLASP2;CLASP2	S										1	0.00253529	60.196	1	60.196	60.1963	721.803	-0.88301	SLRGVTEAIQNFSFRSQEDMNEPLKRDSKKD	_S(ph)QEDM(ox)NEPLKR_	ATM_ATR_group;CK1_group;NEK1_NEK5_NEK3_NEK4_NEK11_NEK2_group	ATM;CSNK1D;NEK1	0.0998	0.4331	2.7766					ATM kinase substrate motif;Casein kinase II substrate motif;DNA dependent Protein kinase substrate motif;Pyruvate dehydrogenase kinase substrate motif
F5H604	601	F5H604	601	F5H604;O75122;J3KR49;E3W994;E9PBA6;E7EW49;E7ERI8;F5H3X0;E7ENG2;B3KR06	601;368;368;368;90;602;601;353;378;374	CLIP-associating protein 2	CLASP2;CLASP2;CLASP2;CLASP2;CLASP2;CLASP2;CLASP2;CLASP2;CLASP2	S			-0.242584	-0.24081		-0.24081				1	3.14e-17	156.22	0.521137	81.735	0.367407	728.327	-0.49366	AGSSKASSLPGSLQRSRSDIDVNAAAGAKAH	_S(ph)RSDIDVN(de)AAAGAK_	ATM_ATR_group;GSK3_group;NEK1_NEK5_NEK3_NEK4_NEK11_NEK2_group;PAK_group	ATM;GSK3A;GSK3B;NEK1;PAK1	0.0673	0.621	2.728					Casein kinase II substrate motif;MAPKAPK2 kinase substrate motif;Pyruvate dehydrogenase kinase substrate motif
F5H604	603	F5H604	603	F5H604;O75122;J3KR49;E3W994;E9PBA6;E7EW49;E7ERI8;F5H3X0;E7ENG2;B3KR06	603;370;370;370;92;604;603;355;380;376	CLIP-associating protein 2	CLASP2;CLASP2;CLASP2;CLASP2;CLASP2;CLASP2;CLASP2;CLASP2;CLASP2	S			-0.127809	-0.25546	-0.604981	-0.262711				1	9.65e-47	217.42	0.997018	217.42	25.2426	727.835	1.2641	SSKASSLPGSLQRSRSDIDVNAAAGAKAHHA	_SRS(ph)DIDVNAAAGAK_	CaMKII_group;NEK1_NEK5_NEK3_NEK4_NEK11_NEK2_group;PAK_group	CAMK2A;NEK1;PAK1	0.1166	0.3915	1.5375					14-3-3 domain binding motif;Calmodulin-dependent protein kinase I substrate motif;Calmodulin-dependent protein kinase II substrate motif;Calmodulin-dependent protein kinase IV substrate motif;Casein kinase II substrate motif;Chk1 kinase substrate motif;PKA kinase substrate motif;PKC kinase substrate motif;Pyruvate dehydrogenase kinase substrate motif
F5H604	560	F5H604	560	F5H604;O75122;J3KR49;E3W994;E9PBA6;E7EW49;E7ERI8;F5H3X0;E7ENG2;B3KR06	560;327;327;327;49;561;560;312;337;333	CLIP-associating protein 2	CLASP2;CLASP2;CLASP2;CLASP2;CLASP2;CLASP2;CLASP2;CLASP2;CLASP2	S			0.128161	0.445303	-0.0640726	0.128161				1	1.47e-13	141.86	0.982431	94.387	20.4693	603.267	-0.2938	GSVASLPQSDRSSSSSQESLNRPFSSKWSTA	_SSSSS(ph)QESLNRPFSSK_	ATM_ATR_group;CK1_group;GSK3_group;NEK1_NEK5_NEK3_NEK4_NEK11_NEK2_group;PAK_group;TTK	ATM;CSNK1A1;CSNK1D;GSK3A;GSK3B;NEK1;PAK1;TTK	0.0834	0.4211	2.62885					ATM kinase substrate motif;Casein kinase I substrate motif;Casein kinase II substrate motif;DNA dependent Protein kinase substrate motif;MAPKAPK2 kinase substrate motif;MDC1 BRCT domain binding motif;Plk1 PBD domain binding motif
F5H604	808	F5H604	808	F5H604;O75122;J3KR49;E3W994;E9PBA6	808;596;596;575;297	CLIP-associating protein 2	CLASP2;CLASP2;CLASP2;CLASP2	S			0.305562	0.157044	0.269632	0.298072				1	4.12e-68	237.14	0.999989	237.14	49.7078	905.927	-0.13982	RLSSSVSAMRVLNTGSDVEEAVADALKKPAR	_VLNTGS(ph)DVEEAVADALK_	NEK1_NEK5_NEK3_NEK4_NEK11_NEK2_group	NEK1	0.0298	0.621	2.6244					Casein kinase II substrate motif
F5H604	806	F5H604	806	F5H604;O75122;J3KR49;E3W994;E9PBA6	806;594;594;573;295	CLIP-associating protein 2	CLASP2;CLASP2;CLASP2;CLASP2	T			0.358284	0.399445		0.358284				1	0.000270426	74.953	0.559179	64.723	1.03288	604.287	0.13097	SSRLSSSVSAMRVLNTGSDVEEAVADALKKP	_VLNT(ph)GSDVEEAVADALK_	GSK3_group;NEK1_NEK5_NEK3_NEK4_NEK11_NEK2_group;TTK	GSK3A;GSK3B;NEK1;TTK	0.0459	0.7135	3.47555					AMP-activated protein kinase substrate motif;Casein kinase II substrate motif
F5H658	460	F5H658	460	F5H658;Q14562	460;460	ATP-dependent RNA helicase DHX8	DHX8;DHX8	S			-0.0605778	0.00345838	0.0687396	-0.0180013				1	0.000368318	106.79	1	106.79	72.0355	566.724	-0.66768	EPPFLRGHTKQSMDMSPIKIVKNPDGSLSQA	_QSMDM(ox)S(ph)PIK_	MAPK3_MAPK1_MAPK7_NLK_group	MAPK1;MAPK3	0.2357	0.2037	1.3614					Cdc2 kinase substrate motif;CDK kinase substrate motif;CDK1,2,4,6 kinase substrate motif;ERK1,2 kinase substrate motif;GSK-3, ERK1, ERK2, CDK5 substrate motif;MAPKAPK2 kinase substrate motif;WW domain binding motif
F5H7W8	180	F5H7W8	180	F5H7W8;Q96C57;G5EA44;E7ENF1;F6TFQ5;H0YGK4;F5H3K2;F5H8B7	180;179;169;149;138;133;134;117	Uncharacterized protein C12orf43	C12orf43;C12orf43;C12orf43;C12orf43;C12orf43;C12orf43;C12orf43;C12orf43	S			0.234624	0.0368901	0.143132	0.143132				1	2.78e-135	302.05	0.996442	167.48	25.7622	1210.07	0.96673	AAVSASDILQESAIHSPGTVEKEAKKKRKLK	_EAAVSASDILQESAIHS(ph)PGTVEK_	MAPK3_MAPK1_MAPK7_NLK_group	MAPK3	0.2178	0.1481	1.5839					Casein kinase I substrate motif;Casein kinase II substrate motif;ERK1,2 kinase substrate motif;GSK-3, ERK1, ERK2, CDK5 substrate motif;MAPKAPK2 kinase substrate motif;WW domain binding motif
F5H7W8	246	F5H7W8	246	F5H7W8;Q96C57;G5EA44;E7ENF1;F6TFQ5;H0YGK4	246;245;235;215;204;199	Uncharacterized protein C12orf43	C12orf43;C12orf43;C12orf43;C12orf43;C12orf43;C12orf43	S										1	0.0116627	49.988	0.333333	45.14	0	670.318	-3.0081	QVSLGTKKKKKAKKASETSPFPPAKSATAIP	_KAS(ph)ETSPFPPAK_	PKC_group	PRKCB	0.1082	0.2808	1.0034					Casein kinase I substrate motif;Casein kinase II substrate motif;G protein-coupled receptor kinase 1 substrate motif;PKA kinase substrate motif;PKC kinase substrate motif
F5H7W8	249	F5H7W8	249	F5H7W8;Q96C57;G5EA44;E7ENF1;F6TFQ5;H0YGK4	249;248;238;218;207;202	Uncharacterized protein C12orf43	C12orf43;C12orf43;C12orf43;C12orf43;C12orf43;C12orf43	S										1	0.00165855	56.339	0.674606	56.339	3.96758	670.318	0.91179	LGTKKKKKAKKASETSPFPPAKSATAIPAN_	_KASETS(ph)PFPPAK_	MAPK3_MAPK1_MAPK7_NLK_group	MAPK3	0.1895	0.1481	1.4452					ERK1,2 kinase substrate motif;G protein-coupled receptor kinase 1 substrate motif;GSK-3, ERK1, ERK2, CDK5 substrate motif;WW domain binding motif
F5H7W8	248	F5H7W8	248	F5H7W8;Q96C57;G5EA44;E7ENF1;F6TFQ5;H0YGK4	248;247;237;217;206;201	Uncharacterized protein C12orf43	C12orf43;C12orf43;C12orf43;C12orf43;C12orf43;C12orf43	T										1	0.0116627	49.988	0.333333	45.14	0	670.318	-3.0081	SLGTKKKKKAKKASETSPFPPAKSATAIPAN	_KAS(ph)ETSPFPPAK_										b-Adrenergic Receptor kinase substrate motif;G protein-coupled receptor kinase 1 substrate motif;PKA kinase substrate motif
F5HFY4	5	F5HFY4	5	F5HFY4;Q99733;C9JZI7;C9J6D1;E9PKT8;E9PNJ7;E9PS34;E9PJJ2;E9PNW0;E9PP22;E9PKI2;C9J1B1	5;5;5;5;5;5;5;5;5;5;5;5	Nucleosome assembly protein 1-like 4	NAP1L4b;NAP1L4;NAP1L4;NAP1L4;NAP1L4;NAP1L4;NAP1L4;NAP1L4;NAP1L4;NAP1L4;NAP1L4;NAP1L4	S	+		0.660746	0.928276	0.873813	0.849359	0.0182069	0.0366088		0.59501	1.45e-54	220.62	0.999234	220.62	31.1575	970.899	-0.65644	___________MADHSFSDGVPSDSVEAAKN	_(ac)ADHS(ph)FSDGVPSDSVEAAK_	CK2_group;PKC_group	CSNK2A1;CSNK2A2;PRKCA;PRKCB	0.1723	0.4047	3.13895					Casein kinase II substrate motif;Pyruvate dehydrogenase kinase substrate motif
F5HFY4	7	F5HFY4	7	F5HFY4;Q99733;C9JZI7;C9J6D1;E9PKT8;E9PNJ7;E9PS34;E9PJJ2;E9PNW0;E9PP22;E9PKI2;C9J1B1	7;7;7;7;7;7;7;7;7;7;7;7	Nucleosome assembly protein 1-like 4	NAP1L4b;NAP1L4;NAP1L4;NAP1L4;NAP1L4;NAP1L4;NAP1L4;NAP1L4;NAP1L4;NAP1L4;NAP1L4;NAP1L4	S			0.0501883			0.0501882	0.0182069	0.0366088		0.59501	0.00993383	45.011	0.844985	45.011	7.45156	647.602	0.086911	_________MADHSFSDGVPSDSVEAAKNAS	_(ac)ADHSFS(ph)DGVPSDSVEAAK_	CK2_group	CSNK2A1;CSNK2A2	0.075	0.673	2.43715					G protein-coupled receptor kinase 1 substrate motif
F5HFY4	12	F5HFY4	12	F5HFY4;Q99733;C9JZI7;C9J6D1;E9PKT8;E9PNJ7;E9PS34;E9PJJ2;E9PNW0;E9PP22;E9PKI2;C9J1B1	12;12;12;12;12;12;12;12;12;12;12;12	Nucleosome assembly protein 1-like 4	NAP1L4b;NAP1L4;NAP1L4;NAP1L4;NAP1L4;NAP1L4;NAP1L4;NAP1L4;NAP1L4;NAP1L4;NAP1L4;NAP1L4	S			-0.151442	-0.108861	0.0809305	-0.118367	0.0182069	0.0366088		0.59501	5.07e-82	247.52	0.997959	247.52	26.8932	970.899	0.48334	____MADHSFSDGVPSDSVEAAKNASNTEKL	_(ac)ADHSFSDGVPS(ph)DSVEAAK_	CK2_group	CSNK2A1;CSNK2A2	0.2342	0.673	9.15655					Casein kinase II substrate motif;DNA dependent Protein kinase substrate motif
F5HFY4	125	F5HFY4	125	F5HFY4;Q99733;C9JZI7;C9J6D1;A8MXH2;E9PKT8;E9PNJ7;E9PS34	125;125;137;125;94;137;125;125	Nucleosome assembly protein 1-like 4	NAP1L4b;NAP1L4;NAP1L4;NAP1L4;NAP1L4;NAP1L4;NAP1L4;NAP1L4	S			-0.0875954	-0.0941716	-0.120812	-0.0941716		0.0366088		0.59501	2.27e-72	228.34	0.99998	228.34	46.9647	1211.17	0.2642	ITGDVEPTDAESEWHSENEEEEKLAGDMKSK	_EFITGDVEPTDAESEWHS(ph)ENEEEEKLAGDMK_	CK2_group	CSNK2A1;CSNK2A2	0.5041	0.673	19.5289					Casein kinase I substrate motif;Casein kinase II substrate motif;G protein-coupled receptor kinase 1 substrate motif;MAPKAPK2 kinase substrate motif
F5HFY4	53	F5HFY4	53	F5HFY4;Q99733;C9J6D1;A8MXH2;E9PNJ7;E9PS34;E9PJJ2;E9PNW0;E9PP22;E9PKI2	53;53;53;22;53;53;53;53;53;53	Nucleosome assembly protein 1-like 4	NAP1L4b;NAP1L4;NAP1L4;NAP1L4;NAP1L4;NAP1L4;NAP1L4;NAP1L4;NAP1L4;NAP1L4	S								0.0366088		0.59501	1.1e-06	116.21	0.49077	72.086	0	995.98	-0.89466	LAALQERLDNVPHTPSSYIETLPKAVKRRIN	_LDNVPHTPS(ph)SYIETLPK_	CK2_group;PAK_group	CSNK2A2;PAK1	0.07905	0.40325	1.6979					DNA dependent Protein kinase substrate motif
F5HFY4	54	F5HFY4	54	F5HFY4;Q99733;C9J6D1;A8MXH2;E9PNJ7;E9PS34;E9PJJ2;E9PNW0;E9PP22;E9PKI2	54;54;54;23;54;54;54;54;54;54	Nucleosome assembly protein 1-like 4	NAP1L4b;NAP1L4;NAP1L4;NAP1L4;NAP1L4;NAP1L4;NAP1L4;NAP1L4;NAP1L4;NAP1L4	S			-0.045759	-0.183376		-0.0805608	0.170181	0.0366088		0.59501	1.1e-06	116.21	0.831469	85.231	7.14333	664.322	-0.18738	AALQERLDNVPHTPSSYIETLPKAVKRRINA	_LDNVPHTPSS(ph)YIETLPK_	CK1_group;CK2_group;PAK_group	CSNK1A1;CSNK2A1;CSNK2A2;PAK1	0.14635	0.40325	2.98095					Casein kinase I substrate motif;Casein kinase II substrate motif;G protein-coupled receptor kinase 1 substrate motif;MDC1 BRCT domain binding motif;Plk1 PBD domain binding motif
F5HFY4	51	F5HFY4	51	F5HFY4;Q99733;C9J6D1;A8MXH2;E9PNJ7;E9PS34;E9PJJ2;E9PNW0;E9PP22;E9PKI2	51;51;51;20;51;51;51;51;51;51	Nucleosome assembly protein 1-like 4	NAP1L4b;NAP1L4;NAP1L4;NAP1L4;NAP1L4;NAP1L4;NAP1L4;NAP1L4;NAP1L4;NAP1L4	T			0.373175	0.212009		0.338909	0.170181	0.0366088		0.59501	0.000375411	95.996	0.991376	95.996	23.68	995.98	2.3377	RVLAALQERLDNVPHTPSSYIETLPKAVKRR	_LDNVPHT(ph)PSSYIETLPK_	CDK2_CDK3_CDK1_CDK5_group;MAPK3_MAPK1_MAPK7_NLK_group	CDK2;MAPK1;MAPK3	0.285	0.2265	1.7579					Casein kinase I substrate motif;Casein kinase II substrate motif;ERK1,2 kinase substrate motif;GSK3, Erk1, Erk2 and CDK5 kinase motif;GSK-3, ERK1, ERK2, CDK5 substrate motif;WW domain binding motif
F5HFY4	58	F5HFY4	58	F5HFY4;Q99733;C9J6D1;A8MXH2;E9PNJ7;E9PS34;E9PJJ2;E9PNW0;E9PP22;E9PKI2	58;58;58;27;58;58;58;58;58;58	Nucleosome assembly protein 1-like 4	NAP1L4b;NAP1L4;NAP1L4;NAP1L4;NAP1L4;NAP1L4;NAP1L4;NAP1L4;NAP1L4;NAP1L4	T			-0.494942			-0.494942	0.170181	0.0366088		0.59501	0.000755527	84.689	0.998718	84.689	31.3476	664.322	0.3544	ERLDNVPHTPSSYIETLPKAVKRRINALKQL	_LDNVPHTPSSYIET(ph)LPK_	CK2_group;TTK	CSNK2A2;TTK	0.03725	0.40705	1.7284					b-Adrenergic Receptor kinase substrate motif;G protein-coupled receptor kinase 1 substrate motif;MAPKAPK2 kinase substrate motif
F6MFW1	984	F6MFW1	984	F6MFW1;Q9UPS6	984;984	Histone-lysine N-methyltransferase SETD1B	SETD1B;SETD1B	S										1	2.79e-05	100.19	0.413516	95.957	1.49368	748.32	-1.0436	PPDTTSSGDQKRLRPSTSVDEEDEESERERD	_LRPS(ph)TSVDEEDEESERER_	PAK_group;PKC_group	PAK1;PRKCB	0.15855	0.15295	1.2815					Casein kinase II substrate motif;DNA dependent Protein kinase substrate motif;PKA kinase substrate motif;PKC kinase substrate motif
F6MFW1	986	F6MFW1	986	F6MFW1;Q9UPS6	986;986	Histone-lysine N-methyltransferase SETD1B	SETD1B;SETD1B	S										1	2.79e-05	100.19	0.333333	96.79	0	748.32	-0.93591	DTTSSGDQKRLRPSTSVDEEDEESERERDRD	_LRPS(ph)TSVDEEDEESERER_	CaMKII_group	CAMK2A	0.1316	0.1946	1.6097					Casein kinase II substrate motif
F6MFW1	985	F6MFW1	985	F6MFW1;Q9UPS6	985;985	Histone-lysine N-methyltransferase SETD1B	SETD1B;SETD1B	T										1	2.79e-05	100.19	0.333333	96.79	0	748.32	-0.93591	PDTTSSGDQKRLRPSTSVDEEDEESERERDR	_LRPS(ph)TSVDEEDEESERER_	CaMKII_group;PAK_group	CAMK2A;PAK1	0.14085	0.16995	1.4131					Akt kinase substrate motif;Calmodulin-dependent protein kinase II substrate motif;Casein kinase II substrate motif;MDC1 BRCT domain binding motif;PKC kinase substrate motif;Plk1 PBD domain binding motif
F6QR24	645	F6QR24	645	F6QR24;P49790	645;614	Nuclear pore complex protein Nup153	NUP153;NUP153	S			0.833983	0.182819	0.607011	0.607011				1	2.71e-42	202.22	0.999996	202.22	54.0186	912.961	0.12235	PAEILKEGSVLDILKSPGFASPKIDSVAAQP	_EGSVLDILKS(ph)PGFASPK_	MAPK3_MAPK1_MAPK7_NLK_group	MAPK1;MAPK3	0.2127	0.423	1.58555					ERK1,2 kinase substrate motif;G protein-coupled receptor kinase 1 substrate motif;Growth associated histone HI kinase substrate motif;GSK-3, ERK1, ERK2, CDK5 substrate motif;WW domain binding motif
F6QR24	560	F6QR24	560	F6QR24;P49790	560;529	Nuclear pore complex protein Nup153	NUP153;NUP153	S	+		0.88323	0.972399	0.924708	0.899485				1	0.0121485	77.732	0.999856	77.732	38.4275	429.212	-0.53172	MTSPSSTGSPMFKFSSPIVKSTEANVLPPSS	_FSS(ph)PIVK_	CDK2_CDK3_CDK1_CDK5_group	CDK1	0.256	0.3805	1.251					Calmodulin-dependent protein kinase II substrate motif;Chk1 kinase substrate motif;ERK1,2 kinase substrate motif;GSK-3, ERK1, ERK2, CDK5 substrate motif;MDC1 BRCT domain binding motif;PKA kinase substrate motif;PKC kinase substrate motif;Plk1 PBD domain binding motif;WW domain binding motif
F6QR24	330	F6QR24	330	F6QR24;P49790	330;330	Nuclear pore complex protein Nup153	NUP153;NUP153	S										1	0.00865679	51.819	0.382662	51.819	0.93668	916.469	1.0419	LEKMSSPLADAKRIPSIVSSPLNSPLDRSGI	_RIPS(ph)IVSSPLN(de)SPLDR_	CaMKII_group;PAK_group;PKB_group	AKT1;AKT2;CAMK2A;PAK1	0.2586	0.39715	1.21525					14-3-3 domain binding motif;Calmodulin-dependent protein kinase II substrate motif;Casein kinase I substrate motif;Casein kinase II substrate motif;DNA dependent Protein kinase substrate motif;G protein-coupled receptor kinase 1 substrate motif;GSK3 kinase substrate motif;Phosphorylase kinase substrate motif;PKA kinase substrate motif;PKC kinase substrate motif
F6QR24	333	F6QR24	333	F6QR24;P49790	333;333	Nuclear pore complex protein Nup153	NUP153;NUP153	S					0.235237	0.235237				1	0.000100703	100.92	0.571705	100.92	1.41057	916.469	1.8593	MSSPLADAKRIPSIVSSPLNSPLDRSGIDIT	_RIPSIVS(ph)SPLN(de)SPLDR_
F6QR24	334	F6QR24	334	F6QR24;P49790	334;334	Nuclear pore complex protein Nup153	NUP153;NUP153	S			0.163885	0.148999	0.137504	0.15782				1	6.89e-36	171.68	0.97372	91.725	15.6982	610.987	0.024975	SSPLADAKRIPSIVSSPLNSPLDRSGIDITD	_RIPSIVSS(ph)PLNSPLDR_	MAPK3_MAPK1_MAPK7_NLK_group	MAPK3	0.1896	0.4127	2.0113					Casein kinase I substrate motif;ERK1,2 kinase substrate motif;G protein-coupled receptor kinase 1 substrate motif;GSK3 kinase substrate motif;GSK-3, ERK1, ERK2, CDK5 substrate motif;MAPKAPK2 kinase substrate motif;MDC1 BRCT domain binding motif;Plk1 PBD domain binding motif;WW domain binding motif
F6QR24	338	F6QR24	338	F6QR24;P49790	338;338	Nuclear pore complex protein Nup153	NUP153;NUP153	S				0.280481	0.243425	0.261952				1	1.57e-07	125.51	0.998051	125.51	27.2876	837.927	-0.19151	ADAKRIPSIVSSPLNSPLDRSGIDITDFQAK	_IPSIVSSPLNS(ph)PLDR_	CDK2_CDK3_CDK1_CDK5_group;MAPK3_MAPK1_MAPK7_NLK_group	CDK1;MAPK3	0.22245	0.3966	1.6353					Casein kinase II substrate motif;ERK1,2 kinase substrate motif;GSK-3, ERK1, ERK2, CDK5 substrate motif;MAPKAPK2 kinase substrate motif;Pyruvate dehydrogenase kinase substrate motif;WW domain binding motif
F6QR24	320	F6QR24	320	F6QR24;P49790	320;320	Nuclear pore complex protein Nup153	NUP153;NUP153	S			0.471344	0.396488	0.466027	0.445091				1	0.00185287	82.505	0.999237	81.525	31.171	508.212	0.19446	SSTARRILQSLEKMSSPLADAKRIPSIVSSP	_M(ox)SS(ph)PLADAK_										Calmodulin-dependent protein kinase II substrate motif;Chk1 kinase substrate motif;ERK1,2 kinase substrate motif;GSK-3, ERK1, ERK2, CDK5 substrate motif;MDC1 BRCT domain binding motif;PKA kinase substrate motif;PKC kinase substrate motif;Plk1 PBD domain binding motif;WW domain binding motif
F6QR24	203	F6QR24	203	F6QR24;P49790	203;203	Nuclear pore complex protein Nup153	NUP153;NUP153	S			-0.0142373			-0.0142373				1	0.000267934	87.16	0.979649	87.16	16.8249	838.888	1.1394	SSRASDKDITVSKNTSLPPLWSPEAERSHSL	_NTS(ph)LPPLWSPEAER_										Calmodulin-dependent protein kinase II substrate motif;Chk1 kinase substrate motif;MAPKAPK2 kinase substrate motif;Phosphorylase kinase substrate motif;PKA kinase substrate motif;PKC kinase substrate motif
F6QR24	209	F6QR24	209	F6QR24;P49790	209;209	Nuclear pore complex protein Nup153	NUP153;NUP153	S			0.418352	0.424707		0.421587				1	1.34e-05	104.88	0.999921	104.88	41.0545	838.888	-0.92398	KDITVSKNTSLPPLWSPEAERSHSLSQHTAT	_NTSLPPLWS(ph)PEAER_	MAPK3_MAPK1_MAPK7_NLK_group	MAPK3	0.1571	0.4127	1.953					Casein kinase II substrate motif;ERK1,2 kinase substrate motif;GSK-3, ERK1, ERK2, CDK5 substrate motif;WW domain binding motif
F6QR24	547	F6QR24	547	F6QR24;P49790	547;516	Nuclear pore complex protein Nup153	NUP153;NUP153	S				0.521754		0.521754				1	0.00022667	90.654	0.866751	90.654	10.4168	832.857	-0.9871	PINSSQALTNKVQMTSPSSTGSPMFKFSSPI	_VQMTS(ph)PSSTGSPMFK_	MAPK3_MAPK1_MAPK7_NLK_group	MAPK3	0.1549	0.4127	1.9496					Casein kinase I substrate motif;Casein kinase II substrate motif;ERK1,2 kinase substrate motif;G protein-coupled receptor kinase 1 substrate motif;GSK-3, ERK1, ERK2, CDK5 substrate motif;WW domain binding motif
F6QR24	549	F6QR24	549	F6QR24;P49790	549;518	Nuclear pore complex protein Nup153	NUP153;NUP153	S			0.402613			0.402613				1	3.29e-11	141.6	0.552136	141.6	2.62449	832.857	-1.0264	NSSQALTNKVQMTSPSSTGSPMFKFSSPIVK	_VQMTSPS(ph)STGSPMFK_										Casein kinase II substrate motif;DNA dependent Protein kinase substrate motif;G protein-coupled receptor kinase 1 substrate motif;GSK3 kinase substrate motif
F6QR24	553	F6QR24	553	F6QR24;P49790	553;522	Nuclear pore complex protein Nup153	NUP153;NUP153	S			0.39846		0.905505	0.65205				1	0.00179287	64.83	0.818504	64.83	6.75737	848.852	-0.6137	ALTNKVQMTSPSSTGSPMFKFSSPIVKSTEA	_VQM(ox)TSPSSTGS(ph)PM(ox)FK_	CDK2_CDK3_CDK1_CDK5_group;CK1_group;MAPK3_MAPK1_MAPK7_NLK_group	CDK1;CDK2;CSNK1A1;MAPK3	0.2669	0.38	1.58475					ERK1,2 kinase substrate motif;GSK-3, ERK1, ERK2, CDK5 substrate motif;MAPKAPK2 kinase substrate motif;WW domain binding motif
F6QR24	369	F6QR24	369	F6QR24;P49790	369;369	Nuclear pore complex protein Nup153	NUP153;NUP153	T			0.281431		0.0994973	0.253505				1	0.00241325	74.141	0.999986	74.141	48.7757	754.389	0.43812	REKVDSQYPPVQRLMTPKPVSIATNRSVYFK	_LMT(ph)PKPVSIATNR_	MAPK3_MAPK1_MAPK7_NLK_group	MAPK3	0.1971	0.4127	2.0626					Calmodulin-dependent protein kinase I substrate motif;Calmodulin-dependent protein kinase II substrate motif;Calmodulin-dependent protein kinase IV substrate motif;Chk1 kinase substrate motif;Growth associated histone HI kinase substrate motif;GSK-3, ERK1, ERK2, CDK5 substrate motif;PKA kinase substrate motif;PKC kinase substrate motif;WW domain binding motif
F6QR24	202	F6QR24	202	F6QR24;P49790	202;202	Nuclear pore complex protein Nup153	NUP153;NUP153	T										1	0.014954	72.446	0.499822	72.446	0	839.38	1.0574	FSSRASDKDITVSKNTSLPPLWSPEAERSHS	_N(de)T(ph)SLPPLWSPEAER_	CK1_group	CSNK1A1	0.1023	0.2763	1.0384					G protein-coupled receptor kinase 1 substrate motif;PKA kinase substrate motif;PKC kinase substrate motif
F6QR24	546	F6QR24	546	F6QR24;P49790	546;515	Nuclear pore complex protein Nup153	NUP153;NUP153	T										1	0.0102369	45.873	0.46177	45.873	0	849.344	0.86707	SPINSSQALTNKVQMTSPSSTGSPMFKFSSP	_VQ(de)M(ox)T(ph)SPSSTGSPM(ox)FK_										Casein kinase I substrate motif;Casein kinase II substrate motif;G protein-coupled receptor kinase 1 substrate motif;PKA kinase substrate motif
F6WH68	847	F6WH68	847	F6WH68;Q9NZ71	847;847	Regulator of telomere elongation helicase 1	RTEL1;RTEL1	S			-0.416885	-0.219068	-0.102171	-0.219068				1	0.0010574	55.994	0.999759	55.994	38.1249	756.667	0.003684	RGLLAALEHSEQRAGSPGEEQAHSCSTLSLL	_AGS(ph)PGEEQAHSCSTLSLLSEK_										14-3-3 domain binding motif;Calmodulin-dependent protein kinase II substrate motif;Casein kinase II substrate motif;ERK1,2 kinase substrate motif;GSK-3, ERK1, ERK2, CDK5 substrate motif;PKA kinase substrate motif;PKC kinase substrate motif;WW domain binding motif
F8VQY2	678	F8VQY2	678	F8VQY2;Q96RL1	678;677	BRCA1-A complex subunit RAP80	UIMC1;UIMC1	S			0.00906043	0.0462816	-0.00241132	0.0149265				1	0.000113476	118.88	1	118.88	118.882	569.269	0.30277	SREMQSSFTRRDLNESPVKSFVSISEATDCL	_RDLNES(ph)PVK_	CDK2_CDK3_CDK1_CDK5_group	CDK1;CDK2	0.2232	0.55455	5.2528					b-Adrenergic Receptor kinase substrate motif;Casein kinase I substrate motif;Cdc2 kinase substrate motif;CDK kinase substrate motif;CDK1,2,4,6 kinase substrate motif;ERK1,2 kinase substrate motif;G protein-coupled receptor kinase 1 substrate motif;GSK3 kinase substrate motif;GSK-3, ERK1, ERK2, CDK5 substrate motif;WW domain binding motif
F8VQY2	101	F8VQY2	101	F8VQY2;Q96RL1;D6RCF3;D6RCQ3;D6RC40	101;101;101;101;101	BRCA1-A complex subunit RAP80	UIMC1;UIMC1;UIMC1;UIMC1;UIMC1	S			0.184217	0.204642	0.218471	0.20201				1	3.82e-140	319.55	1	168.68	168.679	970.928	0.44965	ALALKMSEQEAREVNSQEEEEEELLRKAIAE	_EVNS(ph)QEEEEEELLRK_	ATM_ATR_group;CK2_group	ATM;ATR;CSNK2A1;CSNK2A2	0.4428	0.40915	2.479					ATM kinase substrate motif;Casein kinase I substrate motif;Casein kinase II substrate motif;DNA dependent Protein kinase substrate motif
F8VQY2	463	F8VQY2	463	F8VQY2;Q96RL1;D6RCF3	463;463;182	BRCA1-A complex subunit RAP80	UIMC1;UIMC1;UIMC1	S			-0.207211		-0.0957895	-0.119244				1	5.61e-06	109.24	0.999844	99.344	38.0793	527.254	0.67089	TQLSSSETFDLEREVSPGSRDILDGVRIIMA	_EVS(ph)PGSRDILDGVR_	CaMKII_group;CDK2_CDK3_CDK1_CDK5_group	CAMK2A;CDK1;CDK2	0.2548	0.4341	1.5855					14-3-3 domain binding motif;Calmodulin-dependent protein kinase II substrate motif;Calmodulin-dependent protein kinase IV substrate motif;Casein kinase I substrate motif;Casein kinase II substrate motif;Chk1 kinase substrate motif;ERK1,2 kinase substrate motif;GSK-3, ERK1, ERK2, CDK5 substrate motif;PKA kinase substrate motif;PKC epsilon kinase substrate motif;PKC kinase substrate motif;WW domain…
F8VQY2	466	F8VQY2	466	F8VQY2;Q96RL1;D6RCF3	466;466;185	BRCA1-A complex subunit RAP80	UIMC1;UIMC1;UIMC1	S			0.241108	0.397474		0.372952				1	2.06e-12	144.97	0.997291	83.751	25.6607	527.254	0.4337	SSSETFDLEREVSPGSRDILDGVRIIMADKE	_EVSPGS(ph)RDILDGVR_	CK1_group;DNAPK;PKC_group	CSNK1A1;HYRC;PRKCB	0.1286	0.1911	1.3241
F8VQY2	44	F8VQY2	44	F8VQY2;Q96RL1;D6RCF3;D6RCQ3;D6RC40;D6RDZ5	44;44;44;44;44;44	BRCA1-A complex subunit RAP80	UIMC1;UIMC1;UIMC1;UIMC1;UIMC1;UIMC1	S										1	0.00249653	48.115	1	48.115	48.115	993.768	1.319	SVKRKRRLEDAFIVISDSDGEEPKEENGLQK	_RLEDAFIVIS(ph)DS(ph)DGEEPKEEN(de)GLQK_	CK2_group	CSNK2A1;CSNK2A2	0.4229	0.4035	2.26135					Casein kinase II substrate motif;Pyruvate dehydrogenase kinase substrate motif
F8VQY2	46	F8VQY2	46	F8VQY2;Q96RL1;D6RCF3;D6RCQ3;D6RC40;D6RDZ5	46;46;46;46;46;46	BRCA1-A complex subunit RAP80	UIMC1;UIMC1;UIMC1;UIMC1;UIMC1;UIMC1	S										1	0.00249653	48.115	1	48.115	48.115	993.768	1.319	KRKRRLEDAFIVISDSDGEEPKEENGLQKTK	_RLEDAFIVIS(ph)DS(ph)DGEEPKEEN(de)GLQK_	CK2_group	CSNK2A1;CSNK2A2	0.5086	0.4035	2.4228					b-Adrenergic Receptor kinase substrate motif;Casein kinase II substrate motif
F8VQY2	140	F8VQY2	140	F8VQY2;Q96RL1;D6RCQ3;D6RC40	140;140;140;140	BRCA1-A complex subunit RAP80	UIMC1;UIMC1;UIMC1;UIMC1	S		+	-0.846376	-0.892446	-0.802915	-0.846376				1	2.33e-07	125.73	0.955597	122.44	14.7858	597.279	1.6164	DASATRSRPLATGPSSQSHQEKTTDSGLTEG	_SRPLATGPSS(ph)QSHQEK_	ATM_ATR_group;CDK2_CDK3_CDK1_CDK5_group	ATM;ATR;CDK1	0.3553	0.4502	1.7412					ATM kinase substrate motif;Casein kinase II substrate motif;DNA dependent Protein kinase substrate motif;MDC1 BRCT domain binding motif;Plk1 PBD domain binding motif
F8VQY2	654	F8VQY2	654	F8VQY2;Q96RL1	654;653	BRCA1-A complex subunit RAP80	UIMC1;UIMC1	S			-0.277307	-0.262936	-0.193602	-0.254083				1	2.24e-05	80.488	0.999999	77.191	60.3985	736.781	0.29466	DADIKSSETGAFRVPSPGMEEAGCSREMQSS	_VPS(ph)PGM(ox)EEAGCSR_	CaMKII_group;CDK2_CDK3_CDK1_CDK5_group	CAMK2A;CDK1	0.13225	0.44295	3.7253					14-3-3 domain binding motif;Calmodulin-dependent protein kinase II substrate motif;DNA dependent Protein kinase substrate motif;ERK1,2 kinase substrate motif;GSK-3, ERK1, ERK2, CDK5 substrate motif;PKA kinase substrate motif;PKC kinase substrate motif;WW domain binding motif
F8VRK6	153	F8VRK6	153	F8VRK6	153		ATXN2	S			0.450274	-0.107601	0.0450235	0.0676387				1	3.28e-05	109.48	1	52.265	52.2654	667.818	-0.058811	SGSDQRVVNGGPPRMSPKAQRHPRNHRVSAG	_VVNGGPPRM(ox)S(ph)PK_										ERK1,2 kinase substrate motif;Growth associated histone HI kinase substrate motif;GSK-3, ERK1, ERK2, CDK5 substrate motif;PKA kinase substrate motif;PKC kinase substrate motif;WW domain binding motif
F8VUX9	349	F8VUX9	349	F8VUX9;Q96KV7	349;349	WD repeat-containing protein 90	WDR90;WDR90	S			-0.204383			-0.204383				1	0.013702	49.493	0.722276	49.493	4.15089	814.363	1.0515	VLTHESAEVPVARTGSCEGFLPDPVLRLKGV	_TGS(ph)CEGFLPDPVLR_										14-3-3 domain binding motif;Calmodulin-dependent protein kinase I substrate motif;Calmodulin-dependent protein kinase II substrate motif;Calmodulin-dependent protein kinase IV substrate motif;Casein kinase II substrate motif;Chk1 kinase substrate motif;PKA kinase substrate motif;PKC kinase substrate motif
F8VVT9	638	F8VVT9	638	F8VVT9;Q99490;J3KNM6	638;638;502	Arf-GAP with GTPase, ANK repeat and PH domain-containing protein 2	AGAP2;AGAP2	S		+	-0.752948	-0.848869	-1.05508	-0.848869				1	4.77e-42	199.73	0.96825	199.73	14.8556	844.412	0.031461	LRAEAAAVAGLSTPGSLHRAAKRRTSLFANR	_AEAAAVAGLSTPGS(ph)LHR_	CK1_group;GRK_group;PKC_group	ADRBK1;CSNK1A1;PRKCA;PRKCB	0.1351	0.34115	1.0818					G protein-coupled receptor kinase 1 substrate motif;MAPKAPK2 kinase substrate motif
F8VVT9	808	F8VVT9	808	F8VVT9;Q99490;J3KNM6	808;808;672	Arf-GAP with GTPase, ANK repeat and PH domain-containing protein 2	AGAP2;AGAP2	S			0.181039	0.157432	0.0404014	0.157432				1	2.87e-31	148.2	0.995074	142.43	23.0537	928.908	1.0897	SKHLLKPDRNLARALSTDCTPSGDLSPLSRE	_ALS(ph)TDCTPSGDLSPLSR_	CaMKII_group;CDK4_CDK6_group;PAK_group;PKB_group	AKT1;CAMK2A;CDK4;PAK1	0.1423	0.4465	3.13755					14-3-3 domain binding motif;Calmodulin-dependent protein kinase II substrate motif;Calmodulin-dependent protein kinase IV substrate motif;Chk1 kinase substrate motif;G protein-coupled receptor kinase 1 substrate motif;PKA kinase substrate motif;PKC kinase substrate motif
F8VVT9	827	F8VVT9	827	F8VVT9;Q99490;J3KNM6	827;827;691	Arf-GAP with GTPase, ANK repeat and PH domain-containing protein 2	AGAP2;AGAP2	S			-0.242311	0.0533895	-0.397657	-0.242311				1	0.0147707	56.225	1	56.225	56.2251	539.238	0.12027	TPSGDLSPLSREPPPSPMVKKQRRKKLTTPS	_EPPPS(ph)PM(ox)VK_	CDK2_CDK3_CDK1_CDK5_group;MAPK3_MAPK1_MAPK7_NLK_group;PKB_group	AKT1;CDK1;CDK2;MAPK3	0.26815	0.3841	1.575					DNA dependent Protein kinase substrate motif;ERK1,2 kinase substrate motif;GSK-3, ERK1, ERK2, CDK5 substrate motif;WW domain binding motif
F8VVT9	648	F8VVT9	648	F8VVT9;Q99490;J3KNM6;H0YHB1	648;648;512;4	Arf-GAP with GTPase, ANK repeat and PH domain-containing protein 2	AGAP2;AGAP2;AGAP2	S			0.0650208	-0.200349	0.230941	0.0650208				1	0.00313531	74.611	0.972044	60.49	15.4122	522.753	-0.034808	LSTPGSLHRAAKRRTSLFANRRGSDSEKRSL	_RTS(ph)LFANR_	CaMKII_group;CDK4_CDK6_group;PAK_group;PKA_group;PKB_group;PKC_group	AKT1;CAMK2A;CDK4;PAK1;PRKACA;PRKCA;PRKCB	0.1908	0.3576	1.4634					14-3-3 domain binding motif;Aurora-A kinase substrate motif;Calmodulin-dependent protein kinase II substrate motif;PAK2 kinase substrate motif;Phosphorylase kinase substrate motif;Pim1 kinase substrate sequence;PKA kinase substrate motif;PKC epsilon kinase substrate motif;PKC kinase substrate motif
F8VWT9	1381	F8VWT9	1381	F8VWT9;J3KPF0;Q9Y4D8	1381;1355;1105	Probable E3 ubiquitin-protein ligase C12orf51	C12orf51;C12orf51	S										1	0.00371509	52.79	0.494509	52.79	0	1161.49	0.96189	TKVISHAVRQPVFLRSMSAPSDLEMIGNEDL	_S(ph)MSAPSDLEMIGNEDLEFTR_										Casein kinase II substrate motif;G protein-coupled receptor kinase 1 substrate motif
F8VWT9	1383	F8VWT9	1383	F8VWT9;J3KPF0;Q9Y4D8	1383;1357;1107	Probable E3 ubiquitin-protein ligase C12orf51	C12orf51;C12orf51	S										1	0.00371509	52.79	0.494509	52.79	0	1161.49	0.96189	VISHAVRQPVFLRSMSAPSDLEMIGNEDLEF	_S(ph)MSAPSDLEMIGNEDLEFTR_										14-3-3 domain binding motif;Calmodulin-dependent protein kinase II substrate motif;Calmodulin-dependent protein kinase IV substrate motif;Casein kinase I substrate motif;Casein kinase II substrate motif;PKA kinase substrate motif;PKC kinase substrate motif
F8VX04	49	F8VX04	49	F8VX04;Q9H2H9;F8VX12	49;49;49	Sodium-coupled neutral amino acid transporter 1	SLC38A1;SLC38A1;SLC38A1	S			-0.0166871	0.00891703	0.00144204	0.00144197				1	0.000295378	100.69	1	99.539	64.8435	623.29	-0.6389	VENGQINSKFISDRESRRSLTNSHLEKKKCD	_FISDRES(ph)RR_	PAK_group;PKA_group;PKC_group	PAK1;PRKACA;PRKCA;PRKCB;PRKCZ	0.3723	0.2045	1.292					AMP-activated protein kinase substrate motif;b-Adrenergic Receptor kinase substrate motif;Casein kinase I substrate motif;Casein kinase II substrate motif;MAPKAPK2 kinase substrate motif;PKA kinase substrate motif;PKC kinase substrate motif
F8VX04	52	F8VX04	52	F8VX04;Q9H2H9;F8VX12	52;52;52	Sodium-coupled neutral amino acid transporter 1	SLC38A1;SLC38A1;SLC38A1	S			-0.0566262	0.0114957	0.016211	-0.0139605				1	1.01e-26	210.93	0.998527	137.93	28.3351	633.298	-0.032791	GQINSKFISDRESRRSLTNSHLEKKKCDEYI	_RS(ph)LTN(de)SHLEK_	CK1_group;PAK_group;PKC_group	CSNK1A1;PAK1;PRKCA;PRKCB	0.1945	0.1857	1.35905					Casein kinase II substrate motif;G protein-coupled receptor kinase 1 substrate motif;GSK3 kinase substrate motif;PKA kinase substrate motif;PKC kinase substrate motif
F8VX04	56	F8VX04	56	F8VX04;Q9H2H9;F8VX12	56;56;56	Sodium-coupled neutral amino acid transporter 1	SLC38A1;SLC38A1;SLC38A1	S			0.00633396	-0.0879174	0.0489336	-0.00536235				1	9.32e-16	188.96	1	168.83	68.8067	594.739	0.0061034	SKFISDRESRRSLTNSHLEKKKCDEYIPGTT	_SLT(ph)NS(ph)HLEK_	PAK_group	PAK1	0.162	0.1288	1.2993					Casein kinase II substrate motif;MAPKAPK2 kinase substrate motif
F8VX04	54	F8VX04	54	F8VX04;Q9H2H9;F8VX12	54;54;54	Sodium-coupled neutral amino acid transporter 1	SLC38A1;SLC38A1;SLC38A1	T			-0.0513095	0.0543624	0.0792927	0.0543623				1	1.38e-54	246.63	0.877771	246.63	8.56208	618.803	0.23229	INSKFISDRESRRSLTNSHLEKKKCDEYIPG	_SLT(ph)NSHLEKK_	CaMKII_group;PAK_group	CAMK2A;PAK1	0.12265	0.13785	1.1806					Calmodulin-dependent protein kinase II substrate motif;PKC kinase substrate motif
F8VXC8	347	F8VXC8	347	F8VXC8;Q8TAQ2	347;347	SWI/SNF complex subunit SMARCC2	SMARCC2;SMARCC2	S			-0.0612851	0.032524	-0.0615411	-0.0470105		-0.197054		0.0413006	0.000218951	78.324	1	78.324	64.6422	1038.47	-0.73604	REEEQEDLTKDMDEPSPVPNVEEVTLPKTVN	_DMDEPS(ph)PVPNVEEVTLPK_	CK1_group;MAPK3_MAPK1_MAPK7_NLK_group	CSNK1A1;MAPK3	0.1424	0.19085	1.24155					Casein kinase I substrate motif;DNA dependent Protein kinase substrate motif;ERK1,2 kinase substrate motif;GSK-3, ERK1, ERK2, CDK5 substrate motif;WW domain binding motif
F8VXC8	302	F8VXC8	302	F8VXC8;Q8TAQ2	302;302	SWI/SNF complex subunit SMARCC2	SMARCC2;SMARCC2	S			-0.288963	-0.207078	-0.0456697	-0.183671		-0.197054		0.0413006	2.38e-42	152.01	0.999986	75.239	49.0016	514.564	1.2119	DRRDKKGGNYKKRKRSPSPSPTPEAKKKNAK	_KRS(ph)PS(ph)PSPTPEAK_	CDK2_CDK3_CDK1_CDK5_group;MAPK3_MAPK1_MAPK7_NLK_group;PAK_group;PKB_group	AKT1;CDK2;MAPK1;MAPK3;PAK1	0.2538	0.2762	1.4797					14-3-3 domain binding motif;Calmodulin-dependent protein kinase II substrate motif;Casein kinase I substrate motif;Casein kinase II substrate motif;ERK1,2 kinase substrate motif;G protein-coupled receptor kinase 1 substrate motif;Growth associated histone HI kinase substrate motif;GSK3 kinase substrate motif;GSK-3, ERK1, ERK2, CDK5 substrate motif;MAPKAPK1 kinase substrate motif;Pim1 kinase subst…
F8VXC8	304	F8VXC8	304	F8VXC8;Q8TAQ2	304;304	SWI/SNF complex subunit SMARCC2	SMARCC2;SMARCC2	S			-0.288963	-0.207078	-0.0456697	-0.183671		-0.197054		0.0413006	2.38e-42	152.01	0.999855	75.239	38.5598	514.564	1.2119	RDKKGGNYKKRKRSPSPSPTPEAKKKNAKKG	_KRS(ph)PS(ph)PSPTPEAK_	CDK2_CDK3_CDK1_CDK5_group;MAPK3_MAPK1_MAPK7_NLK_group;PAK_group;PKB_group	AKT1;CDK2;MAPK1;MAPK3;PAK1	0.2882	0.2762	1.7579					14-3-3 domain binding motif;Akt kinase substrate motif;Calmodulin-dependent protein kinase II substrate motif;Casein kinase I substrate motif;Casein kinase II substrate motif;DNA dependent Protein kinase substrate motif;ERK1,2 kinase substrate motif;G protein-coupled receptor kinase 1 substrate motif;GSK-3, ERK1, ERK2, CDK5 substrate motif;MAPKAPK1 kinase substrate motif;PKA kinase substrate moti…
F8VXC8	283	F8VXC8	283	F8VXC8;Q8TAQ2	283;283	SWI/SNF complex subunit SMARCC2	SMARCC2;SMARCC2	S			0.042084	0.0963968	0.0769695	0.0769695		-0.197054		0.0413006	1.65e-99	278.27	1	276.38	69.5699	842.862	-0.53886	RRKKISAKTLTDEVNSPDSDRRDKKGGNYKK	_TLTDEVNS(ph)PDSDRR_										Casein kinase I substrate motif;Casein kinase II substrate motif;ERK1,2 kinase substrate motif;GSK-3, ERK1, ERK2, CDK5 substrate motif;WW domain binding motif
F8VXC8	286	F8VXC8	286	F8VXC8;Q8TAQ2	286;286	SWI/SNF complex subunit SMARCC2	SMARCC2;SMARCC2	S				-0.844199		-0.844199		-0.197054		0.0413006	0.00110366	64.705	0.57933	64.705	1.40267	643.285	2.1271	KISAKTLTDEVNSPDSDRRDKKGGNYKKRKR	_TLTDEVNSPDS(ph)DRRDK_	PKC_group	PRKCA;PRKCB;PRKCZ	0.439	0.2442	2.4948					b-Adrenergic Receptor kinase substrate motif;PKA kinase substrate motif;PKC kinase substrate motif
F8VY86	1623	F8VY86	1623	F8VY86;Q12888;A6NNK5;H7BZY0	1623;1618;1573;86	Tumor suppressor p53-binding protein 1	TP53BP1;TP53BP1;TP53BP1;TP53BP1	S	+		1.52947	1.54577	1.3111	1.52947				1	1.09e-16	154.82	1	97.579	97.5791	712.837	-1.6007	GPYEAVTPLTKAADISLDNLVEGKRKRRSNV	_AADIS(ph)LDNLVEGK_	CaMKII_group;DNAPK;HIPK1_HIPK2_group;NEK1_NEK5_NEK3_NEK4_NEK11_NEK2_group;PKC_group;TTK	CAMK2A;HIPK2;HYRC;NEK1;PRKCB;TTK	0.084	0.35255	1.69715
F8VY86	1431	F8VY86	1431	F8VY86;Q12888;A6NNK5	1431;1426;1381	Tumor suppressor p53-binding protein 1	TP53BP1;TP53BP1;TP53BP1	S		+	-0.667538	-0.332934	-0.549092	-0.549092				1	6.4e-05	83.788	0.994098	66.886	22.2904	782.037	0.60535	TRETAVPGPLGIEDISPNLSPDDKSFSRVVP	_ETAVPGPLGIEDIS(ph)PNLSPDDK_	CDK2_CDK3_CDK1_CDK5_group;DNAPK;HIPK1_HIPK2_group;MAPK3_MAPK1_MAPK7_NLK_group;NEK1_NEK5_NEK3_NEK4_NEK11_NEK2_group	CDK1;HIPK2;HYRC;MAPK3;NEK1	0.0655	0.563	1.8433					Casein kinase I substrate motif;ERK1,2 kinase substrate motif;G protein-coupled receptor kinase 1 substrate motif;GSK3 kinase substrate motif;GSK-3, ERK1, ERK2, CDK5 substrate motif;WW domain binding motif
F8VY86	1435	F8VY86	1435	F8VY86;Q12888;A6NNK5	1435;1430;1385	Tumor suppressor p53-binding protein 1	TP53BP1;TP53BP1;TP53BP1	S			0.411969	0.40621	0.335483	0.368154				1	1.02e-37	193.18	0.999844	193.18	39.6961	941.115	0.50905	AVPGPLGIEDISPNLSPDDKSFSRVVPRVPD	_ETAVPGPLGIEDISPNLS(ph)PDDKSFSR_	CDK2_CDK3_CDK1_CDK5_group;DNAPK;MAPK3_MAPK1_MAPK7_NLK_group;NEK1_NEK5_NEK3_NEK4_NEK11_NEK2_group	CDK1;CDK2;HYRC;MAPK1;MAPK3;NEK1	0.2419	0.48935	1.6266					Casein kinase II substrate motif;ERK1,2 kinase substrate motif;GSK-3, ERK1, ERK2, CDK5 substrate motif;MAPKAPK2 kinase substrate motif;Pyruvate dehydrogenase kinase substrate motif;WW domain binding motif
F8VY86	1367	F8VY86	1367	F8VY86;Q12888	1367;1362	Tumor suppressor p53-binding protein 1	TP53BP1;TP53BP1	S			-0.00878387	-0.0189365	-0.0106139	-0.0106139				1	0.000143828	120.87	1	66.498	66.4975	474.737	0.33423	ADFALPSSRGGPGKLSPRKGVSQTGTPVCEE	_GGPGKLS(ph)PR_	CDK2_CDK3_CDK1_CDK5_group;DNAPK;MAPK3_MAPK1_MAPK7_NLK_group;NEK1_NEK5_NEK3_NEK4_NEK11_NEK2_group	CDK1;CDK2;HYRC;MAPK1;MAPK3;NEK1	0.2485	0.48935	1.6631					Cdc2 kinase substrate motif;CDK kinase substrate motif;CDK1,2,4,6 kinase substrate motif;ERK1,2 kinase substrate motif;Growth associated histone HI kinase substrate motif;GSK-3, ERK1, ERK2, CDK5 substrate motif;PKA kinase substrate motif;PKC kinase substrate motif;WW domain binding motif
F8VY86	1073	F8VY86	1073	F8VY86;Q12888;A6NNK5	1073;1068;1073	Tumor suppressor p53-binding protein 1	TP53BP1;TP53BP1;TP53BP1	S			0.0129261	0.0836559		0.0836559				1	1.58e-29	178.91	0.982863	136.04	17.5857	670.305	-0.18186	PPTTPIRGNLLHFPSSQGEEEKEKLEGDHTI	_GNLLHFPSS(ph)QGEEEKEK_	ATM_ATR_group;CK2_group;DNAPK;NEK1_NEK5_NEK3_NEK4_NEK11_NEK2_group	ATM;ATR;CSNK2A1;HYRC;NEK1	0.3697	0.563	2.4851					ATM kinase substrate motif;Casein kinase II substrate motif;DNA dependent Protein kinase substrate motif;MDC1 BRCT domain binding motif;Plk1 PBD domain binding motif
F8VY86	557	F8VY86	557	F8VY86;Q12888;A6NNK5;C9JXV0	557;552;557;557	Tumor suppressor p53-binding protein 1	TP53BP1;TP53BP1;TP53BP1;TP53BP1	S			-0.143596	-0.222751	0.268674	0.068602				1	0.000361868	64.315	0.988808	64.315	20.3784	1329.06	2.5612	DEDGENTQIEDTEPMSPVLNSKFVPAENDSI	_IDEDGENTQIEDTEPM(ox)S(ph)PVLNSK_	CDK2_CDK3_CDK1_CDK5_group;DNAPK;MAPK3_MAPK1_MAPK7_NLK_group;NEK1_NEK5_NEK3_NEK4_NEK11_NEK2_group	CDK1;HYRC;MAPK1;MAPK3;NEK1	0.2074	0.563	1.9611					Casein kinase I substrate motif;ERK1,2 kinase substrate motif;GSK-3, ERK1, ERK2, CDK5 substrate motif;WW domain binding motif
F8VY86	1033	F8VY86	1033	F8VY86;Q12888;A6NNK5;C9JXV0	1033;1028;1033;993	Tumor suppressor p53-binding protein 1	TP53BP1;TP53BP1;TP53BP1;TP53BP1	S			0.102053	0.13947	0.0430645	0.0966667				1	2.82e-91	269.44	1	269.44	78.8131	827.888	0.87872	GERKNGSTAVAESVASPQKTMSVLSCICEAR	_KN(de)GSTAVAESVAS(ph)PQK_	CDK2_CDK3_CDK1_CDK5_group;DNAPK;JNK_group;NEK1_NEK5_NEK3_NEK4_NEK11_NEK2_group	CDK1;CDK2;HYRC;MAPK8;NEK1	0.1276	0.563	1.5917					Casein kinase I substrate motif;Cdc2 kinase substrate motif;CDK kinase substrate motif;CDK1,2,4,6 kinase substrate motif;ERK1,2 kinase substrate motif;G protein-coupled receptor kinase 1 substrate motif;GSK-3, ERK1, ERK2, CDK5 substrate motif;WW domain binding motif
F8VY86	814	F8VY86	814	F8VY86;Q12888;A6NNK5;C9JXV0;H7C3N7	814;809;814;814;56	Tumor suppressor p53-binding protein 1	TP53BP1;TP53BP1;TP53BP1;TP53BP1;TP53BP1	S			0.131985	-0.0996954	0.0734089	0.073409				1	8.13e-06	113.08	0.999587	113.08	33.8346	654.97	-0.20155	IEPCAENRLDTKEEKSVEYEGDLKSGTAETE	_LDTKEEKS(ph)VEYEGDLK_	CK1_group;DNAPK;NEK1_NEK5_NEK3_NEK4_NEK11_NEK2_group;TTK	CSNK1A1;HYRC;NEK1;TTK	0.03665	0.46455	1.62445					Casein kinase I substrate motif;Casein kinase II substrate motif;PKA kinase substrate motif
F8VY86	1683	F8VY86	1683	F8VY86;Q12888;A6NNK5;H7BZY0	1683;1678;1633;146	Tumor suppressor p53-binding protein 1	TP53BP1;TP53BP1;TP53BP1;TP53BP1	S			0.546956	0.442333	0.532965	0.53456				1	1.57e-66	255.16	1	223.29	80.3774	798.393	-0.97755	VLSGKRKLITSEEERSPAKRGRKSATVKPVG	_LITSEEERS(ph)PAKR_	CDK2_CDK3_CDK1_CDK5_group;DNAPK;HIPK1_HIPK2_group;NEK1_NEK5_NEK3_NEK4_NEK11_NEK2_group	CDK1;CDK2;HIPK2;HYRC;NEK1	0.0635	0.563	1.8433					Casein kinase I substrate motif;Cdc2 kinase substrate motif;CDK kinase substrate motif;CDK1,2,4,6 kinase substrate motif;ERK1,2 kinase substrate motif;Growth associated histone HI kinase substrate motif;GSK-3, ERK1, ERK2, CDK5 substrate motif;WW domain binding motif
F8VY86	528	F8VY86	528	F8VY86;Q12888;A6NNK5;C9JXV0	528;523;528;528	Tumor suppressor p53-binding protein 1	TP53BP1;TP53BP1;TP53BP1;TP53BP1	S			0.579759			0.579759				1	2.6e-08	121.27	0.938467	121.27	11.8459	775.844	-0.7775	LTGDSCKLMLSTSEYSQSPKMESLSSHRIDE	_LMLSTSEYS(ph)QSPK_	ATM_ATR_group;CK1_group;DNAPK;NEK1_NEK5_NEK3_NEK4_NEK11_NEK2_group	ATM;ATR;CSNK1A1;HYRC;NEK1	0.1285	0.563	2.2718					ATM kinase substrate motif;Casein kinase II substrate motif;DNA dependent Protein kinase substrate motif
F8VY86	1004	F8VY86	1004	F8VY86;Q12888;A6NNK5;C9JXV0	1004;999;1004;964	Tumor suppressor p53-binding protein 1	TP53BP1;TP53BP1;TP53BP1;TP53BP1	S			-0.386167	-0.387487		-0.387487				1	1.66e-28	168.96	0.997371	168.96	25.8358	947.778	-0.171	KLCLRMKLVSPETEASEESLQFNLEKPATGE	_LVSPETEAS(ph)EESLQFNLEKPATGER_	CK1_group;DNAPK;HIPK1_HIPK2_group;NEK1_NEK5_NEK3_NEK4_NEK11_NEK2_group	CSNK1A1;HIPK2;HYRC;NEK1	0.05755	0.47525	1.7094					Casein kinase I substrate motif;Casein kinase II substrate motif;G protein-coupled receptor kinase 1 substrate motif
F8VY86	1007	F8VY86	1007	F8VY86;Q12888;A6NNK5;C9JXV0	1007;1002;1007;967	Tumor suppressor p53-binding protein 1	TP53BP1;TP53BP1;TP53BP1;TP53BP1	S			0.342441		-0.641289	0.342441				1	7.03e-29	175.39	0.999899	175.39	39.9864	947.778	-0.3187	LRMKLVSPETEASEESLQFNLEKPATGERKN	_LVSPETEASEES(ph)LQFNLEKPATGER_	CK1_group;DNAPK;NEK1_NEK5_NEK3_NEK4_NEK11_NEK2_group;PKC_group	CSNK1A1;HYRC;NEK1;PRKCB	0.0745	0.46455	1.56345					b-Adrenergic Receptor kinase substrate motif
F8VY86	1118	F8VY86	1118	F8VY86;Q12888;A6NNK5	1118;1113;1118	Tumor suppressor p53-binding protein 1	TP53BP1;TP53BP1;TP53BP1	S			0.43328			0.43328				1	6.46e-31	144.92	0.609295	144.92	1.92978	847.053	-0.00090553	DPVSPASQKMVIQGPSSPQGEAMVTDVLEDQ	_MVIQGPS(ph)SPQGEAMVTDVLEDQK_	DNAPK;NEK1_NEK5_NEK3_NEK4_NEK11_NEK2_group	HYRC;NEK1	0.02995	0.6915	2.6808					DNA dependent Protein kinase substrate motif
F8VY86	1119	F8VY86	1119	F8VY86;Q12888;A6NNK5	1119;1114;1119	Tumor suppressor p53-binding protein 1	TP53BP1;TP53BP1;TP53BP1	S			-0.0894361	-0.131266	-0.0854967	-0.102806				1	2.45e-102	274.3	0.999864	274.3	38.6651	961.108	-0.91814	PVSPASQKMVIQGPSSPQGEAMVTDVLEDQK	_MVIQGPSS(ph)PQGEAMVTDVLEDQKEGR_	CDK2_CDK3_CDK1_CDK5_group;DNAPK;MAPK3_MAPK1_MAPK7_NLK_group;NEK1_NEK5_NEK3_NEK4_NEK11_NEK2_group	CDK1;CDK2;HYRC;MAPK1;MAPK3;NEK1	0.2196	0.48935	1.62975					ERK1,2 kinase substrate motif;GSK-3, ERK1, ERK2, CDK5 substrate motif;MDC1 BRCT domain binding motif;Plk1 PBD domain binding motif;WW domain binding motif
F8VY86	505	F8VY86	505	F8VY86;Q12888;A6NNK5;C9JXV0	505;500;505;505	Tumor suppressor p53-binding protein 1	TP53BP1;TP53BP1;TP53BP1;TP53BP1	S			0.00216244	0.0784732	-0.0217604	0.0144981				1	1.55e-10	135.21	1	135.21	100.421	886.874	1.002	LTVECSKTSEIEPKNSPEDLGLSLTGDSCKL	_NS(ph)PEDLGLSLTGDSCK_	CDK2_CDK3_CDK1_CDK5_group;DNAPK;NEK1_NEK5_NEK3_NEK4_NEK11_NEK2_group	CDK1;HYRC;NEK1	0.0297	0.82	3.8106					AMP-activated protein kinase substrate motif;Casein kinase II substrate motif;ERK1,2 kinase substrate motif;GSK-3, ERK1, ERK2, CDK5 substrate motif;PKA kinase substrate motif;PKC kinase substrate motif;Pyruvate dehydrogenase kinase substrate motif;WW domain binding motif
F8VY86	1465	F8VY86	1465	F8VY86;Q12888;A6NNK5	1465;1460;1415	Tumor suppressor p53-binding protein 1	TP53BP1;TP53BP1;TP53BP1	S			-0.0138294	-0.302564		-0.213906				1	2.53e-07	84.582	0.544028	84.582	0.766837	1094.84	-0.27242	DSTRRTDVGAGALRRSDSPEIPFQAAAGPSD	_RS(ph)DSPEIPFQAAAGPSDGLDASSPGNSFVGLR_	DNAPK;NEK1_NEK5_NEK3_NEK4_NEK11_NEK2_group;PAK_group	HYRC;NEK1;PAK1	0.0717	0.563	2.0934					Casein kinase II substrate motif;PKA kinase substrate motif;PKC kinase substrate motif
F8VY86	1467	F8VY86	1467	F8VY86;Q12888;A6NNK5	1467;1462;1417	Tumor suppressor p53-binding protein 1	TP53BP1;TP53BP1;TP53BP1	S			-0.511094			-0.511094				1	2.61e-39	145.23	0.822512	145.23	6.65974	1094.84	1.8399	TRRTDVGAGALRRSDSPEIPFQAAAGPSDGL	_RSDS(ph)PEIPFQAAAGPSDGLDASSPGNSFVGLR_	CDK2_CDK3_CDK1_CDK5_group;DNAPK;NEK1_NEK5_NEK3_NEK4_NEK11_NEK2_group	CDK1;HYRC;NEK1	0.0325	0.82	3.8106					14-3-3 domain binding motif;b-Adrenergic Receptor kinase substrate motif;Calmodulin-dependent protein kinase II substrate motif;Calmodulin-dependent protein kinase IV substrate motif;Casein kinase II substrate motif;Chk1 kinase substrate motif;ERK1,2 kinase substrate motif;G protein-coupled receptor kinase 1 substrate motif;GSK-3, ERK1, ERK2, CDK5 substrate motif;PKA kinase substrate motif;PKC ki…
F8VY86	270	F8VY86	270	F8VY86;Q12888;A6NNK5;C9JXV0	270;265;270;270	Tumor suppressor p53-binding protein 1	TP53BP1;TP53BP1;TP53BP1;TP53BP1	S			-0.052087	-0.00604312	0.135666	0.0441843				1	6.29e-06	141.44	1	117.86	90.0879	559.217	-0.21867	KEQNPPPARSEDMPFSPKASVAAMEAKEQLS	_SEDMPFS(ph)PK_	CDK2_CDK3_CDK1_CDK5_group;DNAPK;HIPK1_HIPK2_group;NEK1_NEK5_NEK3_NEK4_NEK11_NEK2_group	CDK1;CDK2;HIPK2;HYRC;NEK1	0.0529	0.563	1.605					Casein kinase I substrate motif;ERK1,2 kinase substrate motif;G protein-coupled receptor kinase 1 substrate motif;Growth associated histone HI kinase substrate motif;GSK3 kinase substrate motif;GSK-3, ERK1, ERK2, CDK5 substrate motif;PKA kinase substrate motif;PKC kinase substrate motif;WW domain binding motif
F8VY86	835	F8VY86	835	F8VY86;Q12888;A6NNK5;C9JXV0;H7C3N7	835;830;835;835;77	Tumor suppressor p53-binding protein 1	TP53BP1;TP53BP1;TP53BP1;TP53BP1;TP53BP1	S										1	4.37e-17	157.83	0.49985	157.83	0	803.039	0.33797	DLKSGTAETEPVEQDSSQPSLPLVRADDPLR	_SGTAETEPVEQDS(ph)SQPSLPLVR_	DNAPK;NEK1_NEK5_NEK3_NEK4_NEK11_NEK2_group	HYRC;NEK1	0.03	0.6915	2.68095					b-Adrenergic Receptor kinase substrate motif;Casein kinase I substrate motif;G protein-coupled receptor kinase 1 substrate motif;GSK3 kinase substrate motif
F8VY86	836	F8VY86	836	F8VY86;Q12888;A6NNK5;C9JXV0;H7C3N7	836;831;836;836;78	Tumor suppressor p53-binding protein 1	TP53BP1;TP53BP1;TP53BP1;TP53BP1;TP53BP1	S			0.0699771	0.0854246	0.166715	0.11836				1	3.35e-43	207.55	0.80095	100.62	6.23201	803.039	-0.96449	LKSGTAETEPVEQDSSQPSLPLVRADDPLRL	_SGTAETEPVEQDSS(ph)QPSLPLVR_	ATM_ATR_group;DNAPK;NEK1_NEK5_NEK3_NEK4_NEK11_NEK2_group	ATM;ATR;HYRC;NEK1	0.21945	0.6915	4.6001					ATM kinase substrate motif;Casein kinase I substrate motif;Casein kinase II substrate motif;DNA dependent Protein kinase substrate motif;MDC1 BRCT domain binding motif;Plk1 PBD domain binding motif
F8VY86	839	F8VY86	839	F8VY86;Q12888;A6NNK5;C9JXV0;H7C3N7	839;834;839;839;81	Tumor suppressor p53-binding protein 1	TP53BP1;TP53BP1;TP53BP1;TP53BP1;TP53BP1	S			-0.236911	-0.144409	0.0124972	-0.144409				1	0.000139538	76.162	0.998719	76.162	26.2742	1244.04	-1.3219	GTAETEPVEQDSSQPSLPLVRADDPLRLDQE	_SGTAETEPVEQDS(ph)SQPS(ph)LPLVR_	CK1_group;DNAPK;NEK1_NEK5_NEK3_NEK4_NEK11_NEK2_group	CSNK1A1;HYRC;NEK1	0.0363	0.563	1.5755					DNA dependent Protein kinase substrate motif;MAPKAPK2 kinase substrate motif
F8VY86	1762	F8VY86	1762	F8VY86;Q12888;A6NNK5	1762;1759;1714	Tumor suppressor p53-binding protein 1	TP53BP1;TP53BP1;TP53BP1	S			-0.245164		-0.260117	-0.252638				1	1.91e-28	167.26	0.618605	167.26	2.35153	952.767	-0.97266	KLASRSKLPDGPTGSSEEEEEFLEIPPFNKQ	_SKLPDGPTGSS(ph)EEEEEFLEIPPFNK_	CK1_group;CK2_group;DNAPK;NEK1_NEK5_NEK3_NEK4_NEK11_NEK2_group	CSNK1A1;CSNK2A1;HYRC;NEK1	0.0829	0.4733	2.3364					BARD1 BRCT domain binding motif;Casein kinase II substrate motif;G protein-coupled receptor kinase 1 substrate motif;MDC1 BRCT domain binding motif;Plk1 PBD domain binding motif
F8VY86	364	F8VY86	364	F8VY86;Q12888;A6NNK5;C9JXV0	364;359;364;364	Tumor suppressor p53-binding protein 1	TP53BP1;TP53BP1;TP53BP1;TP53BP1	S										1	7.28e-06	82.36	0.403102	82.36	0	1243.58	-0.093649	LSGQRSLVQDSLSTNSSDLVAPSPDAFRSTP	_SLVQDSLSTNS(ph)SDLVAPSPDAFR_	CK1_group;DNAPK;NEK1_NEK5_NEK3_NEK4_NEK11_NEK2_group;PAK_group;TTK	CSNK1A1;HYRC;NEK1;PAK1;TTK	0.0704	0.4233	1.5755
F8VY86	365	F8VY86	365	F8VY86;Q12888;A6NNK5;C9JXV0	365;360;365;365	Tumor suppressor p53-binding protein 1	TP53BP1;TP53BP1;TP53BP1;TP53BP1	S										1	7.28e-06	82.36	0.403102	82.36	0	1243.58	-0.093649	SGQRSLVQDSLSTNSSDLVAPSPDAFRSTPF	_SLVQDSLSTNS(ph)SDLVAPSPDAFR_	DNAPK;NEK1_NEK5_NEK3_NEK4_NEK11_NEK2_group	HYRC;NEK1	0.03405	0.6915	2.82295					G protein-coupled receptor kinase 1 substrate motif;MAPKAPK2 kinase substrate motif;MDC1 BRCT domain binding motif;Plk1 PBD domain binding motif
F8VY86	371	F8VY86	371	F8VY86;Q12888;A6NNK5;C9JXV0	371;366;371;371	Tumor suppressor p53-binding protein 1	TP53BP1;TP53BP1;TP53BP1;TP53BP1	S			0.0963968	-0.0506668		0.0963968				1	1.06e-43	198.28	0.982607	69.356	18.4988	1244.56	2.0828	VQDSLSTNSSDLVAPSPDAFRSTPFIVPSSP	_SLVQ(de)DSLSTN(de)SSDLVAPS(ph)PDAFR_	CDK2_CDK3_CDK1_CDK5_group;DNAPK;HIPK1_HIPK2_group;MAPK3_MAPK1_MAPK7_NLK_group;NEK1_NEK5_NEK3_NEK4_NEK11_NEK2_group	CDK1;HIPK2;HYRC;MAPK3;NEK1	0.0753	0.563	1.8433					DNA dependent Protein kinase substrate motif;ERK1,2 kinase substrate motif;GSK-3, ERK1, ERK2, CDK5 substrate motif;WW domain binding motif
F8VY86	385	F8VY86	385	F8VY86;Q12888;A6NNK5;C9JXV0	385;380;385;385	Tumor suppressor p53-binding protein 1	TP53BP1;TP53BP1;TP53BP1;TP53BP1	S			-0.0484569	-0.108721	0.152768	-0.0535985				1	1.79e-42	202.07	0.970835	85.146	17.7158	604.612	-1.06	PSPDAFRSTPFIVPSSPTEQEGRQDKPMDTS	_STPFIVPSS(ph)PTEQEGR_	CDK2_CDK3_CDK1_CDK5_group;MAPK3_MAPK1_MAPK7_NLK_group;NEK1_NEK5_NEK3_NEK4_NEK11_NEK2_group	CDK1;MAPK3;NEK1	0.1541	0.563	1.551					Casein kinase II substrate motif;ERK1,2 kinase substrate motif;GSK-3, ERK1, ERK2, CDK5 substrate motif;MDC1 BRCT domain binding motif;Plk1 PBD domain binding motif;WW domain binding motif
F8VY86	1322	F8VY86	1322	F8VY86;Q12888;A6NNK5;M0R142	1322;1317;1322;80	Tumor suppressor p53-binding protein 1	TP53BP1;TP53BP1;TP53BP1	S			-0.0784265	-0.221892		-0.150161				1	2.14e-10	138.3	0.998271	138.3	29.3814	583.577	0.9429	ISSFSSKASSLHRTSSGTSLSAMHSSGSSGK	_TSS(ph)GTSLSAMHSSGSSGK_	CaMKII_group;DNAPK;HIPK1_HIPK2_group;NEK1_NEK5_NEK3_NEK4_NEK11_NEK2_group;PAK_group	CAMK2A;HIPK2;HYRC;NEK1;PAK1	0.0692	0.4233	1.7702					14-3-3 domain binding motif;AMP-activated protein kinase substrate motif;Calmodulin-dependent protein kinase I substrate motif;Calmodulin-dependent protein kinase II substrate motif;Calmodulin-dependent protein kinase IV substrate motif;Casein kinase I substrate motif;Casein kinase II substrate motif;Chk1 kinase substrate motif;MDC1 BRCT domain binding motif;PKA kinase substrate motif;PKC kinase …
F8VY86	1325	F8VY86	1325	F8VY86;Q12888;A6NNK5;M0R142	1325;1320;1325;83	Tumor suppressor p53-binding protein 1	TP53BP1;TP53BP1;TP53BP1	S			-0.789462	-0.756818		-0.773146				1	0.000797604	77.045	0.859175	55.063	9.45462	914.845	-1.9118	FSSKASSLHRTSSGTSLSAMHSSGSSGKGAG	_TSS(ph)GTS(ph)LSAMHSSGSSGK_	CK1_group;DNAPK;NEK1_NEK5_NEK3_NEK4_NEK11_NEK2_group;PKC_group	CSNK1A1;HYRC;NEK1;PRKCB	0.09075	0.46455	1.84785					Casein kinase II substrate motif;MAPKAPK2 kinase substrate motif
F8VY86	123	F8VY86	123	F8VY86;Q12888;A6NNK5;C9JXV0	123;118;123;123	Tumor suppressor p53-binding protein 1	TP53BP1;TP53BP1;TP53BP1;TP53BP1	S										1	0.000116146	79.021	0.333321	79.021	0	948.435	0.42428	SISQVIEQLPQPNRTSSVLGMSVESAPAVEE	_T(ph)SSVLGMSVESAPAVEEEKGEELEQK_	DNAPK;NEK1_NEK5_NEK3_NEK4_NEK11_NEK2_group;PAK_group	HYRC;NEK1;PAK1	0.056	0.563	1.6952					PKA kinase substrate motif;PKC kinase substrate motif
F8VY86	124	F8VY86	124	F8VY86;Q12888;A6NNK5;C9JXV0	124;119;124;124	Tumor suppressor p53-binding protein 1	TP53BP1;TP53BP1;TP53BP1;TP53BP1	S										1	0.000116146	79.021	0.333321	79.021	0	948.435	0.42428	ISQVIEQLPQPNRTSSVLGMSVESAPAVEEE	_T(ph)SSVLGMSVESAPAVEEEKGEELEQK_	DNAPK;NEK1_NEK5_NEK3_NEK4_NEK11_NEK2_group;PAK_group;PKC_group;TTK	HYRC;NEK1;PAK1;PRKCB;TTK	0.0629	0.4233	1.6734					14-3-3 domain binding motif;Calmodulin-dependent protein kinase II substrate motif;MDC1 BRCT domain binding motif;Phosphorylase kinase substrate motif;PKA kinase substrate motif;PKC kinase substrate motif;Plk1 PBD domain binding motif
F8VY86	108	F8VY86	108	F8VY86;Q12888;A6NNK5;C9JXV0	108;103;108;108	Tumor suppressor p53-binding protein 1	TP53BP1;TP53BP1;TP53BP1;TP53BP1	S										1	0.000154525	49.618	0.311169	49.618	0	1040.81	4.5971	KVADPVDSSNLDTCGSISQVIEQLPQPNRTS	_VADPVDSSNLDT(ph)CGSISQ(de)VIEQLPQPNR_	CK1_group;DNAPK;NEK1_NEK5_NEK3_NEK4_NEK11_NEK2_group	CSNK1A1;HYRC;NEK1	0.0435	0.563	1.5755					Casein kinase II substrate motif
F8VY86	110	F8VY86	110	F8VY86;Q12888;A6NNK5;C9JXV0	110;105;110;110	Tumor suppressor p53-binding protein 1	TP53BP1;TP53BP1;TP53BP1;TP53BP1	S										1	0.000154525	49.618	0.311169	49.618	0	1040.81	4.5971	ADPVDSSNLDTCGSISQVIEQLPQPNRTSSV	_VADPVDSSNLDT(ph)CGSISQ(de)VIEQLPQPNR_	ATM_ATR_group;DNAPK;HIPK1_HIPK2_group;NEK1_NEK5_NEK3_NEK4_NEK11_NEK2_group	ATM;ATR;HIPK2;HYRC;NEK1	0.1075	0.563	2.2718					ATM kinase substrate motif;DNA dependent Protein kinase substrate motif
F8VY86	776	F8VY86	776	F8VY86;Q12888;A6NNK5;C9JXV0;H7C3N7	776;771;776;776;18	Tumor suppressor p53-binding protein 1	TP53BP1;TP53BP1;TP53BP1;TP53BP1;TP53BP1	S	+		1.15898	1.12829	1.40343	1.15898				1	1.55e-11	134.44	1	134.44	134.443	770.834	-0.97066	VVIVDVKEPSPRVDVSCEPLEGVEKCSDSQS	_VDVS(ph)CEPLEGVEK_	DNAPK;NEK1_NEK5_NEK3_NEK4_NEK11_NEK2_group	HYRC;NEK1	0.037	0.6915	4.0574					Casein kinase II substrate motif
F8VY86	927	F8VY86	927	F8VY86;Q12888;A6NNK5;H7C3N7	927;922;927;169	Tumor suppressor p53-binding protein 1	TP53BP1;TP53BP1;TP53BP1;TP53BP1	T			-0.221977			-0.221977				1	0.000526839	72.227	0.984372	72.227	17.9924	707.045	-0.30808	TLPKEGDIIPPLTGATPPLIGHLKLEPKRHS	_EGDIIPPLTGAT(ph)PPLIGHLK_	CDK2_CDK3_CDK1_CDK5_group;CK1_group;DNAPK;NEK1_NEK5_NEK3_NEK4_NEK11_NEK2_group;TTK	CDK1;CSNK1A1;HYRC;NEK1;TTK	0.0353	0.563	2.4755					GSK-3, ERK1, ERK2, CDK5 substrate motif;WW domain binding motif
F8VY86	1061	F8VY86	1061	F8VY86;Q12888;A6NNK5;C9JXV0;H7C151	1061;1056;1061;1021;26	Tumor suppressor p53-binding protein 1	TP53BP1;TP53BP1;TP53BP1;TP53BP1;TP53BP1	T			0.321466	0.235727	0.110096	0.266637				1	0.0018916	89.43	0.819809	89.43	6.5798	596.766	0.22349	EARQENEARSEDPPTTPIRGNLLHFPSSQGE	_SEDPPTT(ph)PIR_	CDK2_CDK3_CDK1_CDK5_group;MAPK3_MAPK1_MAPK7_NLK_group;NEK1_NEK5_NEK3_NEK4_NEK11_NEK2_group;TTK	CDK1;CDK2;MAPK1;MAPK3;NEK1;TTK	0.2369	0.3969	1.57135					Cdc2 kinase substrate motif;CDK1,2,4,6 kinase substrate motif;ERK1,2 kinase substrate motif;Growth associated histone HI kinase substrate motif;GSK3, Erk1, Erk2 and CDK5 kinase motif;GSK-3, ERK1, ERK2, CDK5 substrate motif;WW domain binding motif
F8VY86	1759	F8VY86	1759	F8VY86;Q12888;A6NNK5	1759;1756;1711	Tumor suppressor p53-binding protein 1	TP53BP1;TP53BP1;TP53BP1	T										1	0.000828628	62.683	0.369861	62.683	0.792957	952.767	-0.63042	TSDKLASRSKLPDGPTGSSEEEEEFLEIPPF	_SKLPDGPT(ph)GSSEEEEEFLEIPPFNK_	CK1_group;CK2_group;DNAPK;NEK1_NEK5_NEK3_NEK4_NEK11_NEK2_group;TTK	CSNK1A1;CSNK2A1;HYRC;NEK1;TTK	0.0297	0.3836	1.3044					Casein kinase I substrate motif;Casein kinase II substrate motif;DNA dependent Protein kinase substrate motif
F8VY86	307	F8VY86	307	F8VY86;Q12888;A6NNK5;C9JXV0	307;302;307;307	Tumor suppressor p53-binding protein 1	TP53BP1;TP53BP1;TP53BP1;TP53BP1	T			0.0479571	0.00719549		0.0275787				1	0.000168761	98.684	0.905453	98.684	9.81228	1121.99	-0.91965	SGLQIQKSPEPEVLSTQEDLFDQSNKTVSSD	_SPEPEVLST(ph)QEDLFDQSNK_	ATM_ATR_group;DNAPK;NEK1_NEK5_NEK3_NEK4_NEK11_NEK2_group;TTK	ATM;ATR;HYRC;NEK1;TTK	0.0454	0.563	2.8084					Casein kinase II substrate motif;MDC1 BRCT domain binding motif;Plk1 PBD domain binding motif
F8VY86	122	F8VY86	122	F8VY86;Q12888;A6NNK5;C9JXV0	122;117;122;122	Tumor suppressor p53-binding protein 1	TP53BP1;TP53BP1;TP53BP1;TP53BP1	T										1	0.000116146	79.021	0.333321	79.021	0	948.435	0.42428	GSISQVIEQLPQPNRTSSVLGMSVESAPAVE	_T(ph)SSVLGMSVESAPAVEEEKGEELEQK_	LKB1;NEK1_NEK5_NEK3_NEK4_NEK11_NEK2_group;TTK	NEK1;STK11;TTK	0.0579	0.377	2.6036
F8VY86	105	F8VY86	105	F8VY86;Q12888;A6NNK5;C9JXV0	105;100;105;105	Tumor suppressor p53-binding protein 1	TP53BP1;TP53BP1;TP53BP1;TP53BP1	T										1	0.000154525	49.618	0.311169	49.618	0	1040.81	4.5971	KENKVADPVDSSNLDTCGSISQVIEQLPQPN	_VADPVDSSNLDT(ph)CGSISQ(de)VIEQLPQPNR_	DNAPK;NEK1_NEK5_NEK3_NEK4_NEK11_NEK2_group;TTK	HYRC;NEK1;TTK	0.0324	0.563	1.552					b-Adrenergic Receptor kinase substrate motif;Casein kinase I substrate motif;Casein kinase II substrate motif;MAPKAPK2 kinase substrate motif
F8VYA6	276	F8VYA6	276	F8VYA6;Q9NRL3;F5GYK2;R4GN16;B4DQH7	276;276;157;126;157	Striatin-4	STRN4;STRN4;STRN4;STRN4	S			-0.160024			-0.160024				1	4.52e-07	78.228	0.999779	78.228	39.1062	1223.52	1.6433	VLGQIPFLQNCEDEDSDEDDELDSVQHKKQR	_LGGSVLGQIPFLQNCEDEDS(ph)DEDDELDSVQHK_	CK1_group;CK2_group;GRK_group	ADRBK1;CSNK1A1;CSNK1D;CSNK2A1	0.1212	0.3619	1.6447					b-Adrenergic Receptor kinase substrate motif;Casein kinase I substrate motif;Casein kinase II substrate motif;Pyruvate dehydrogenase kinase substrate motif
F8VYA6	206	F8VYA6	206	F8VYA6;Q9NRL3;F5GYK2;R4GN16;B4DQH7;M0R0P4;M0QYS2;M0R2A7	206;206;87;56;87;87;87;87	Striatin-4	STRN4;STRN4;STRN4;STRN4	S			-0.125148		-0.301053	-0.213103				1	1.24e-05	104.84	1	104.84	93.5879	853.885	-2.4177	ILDMRSKRVRSLLGRSLELNGAVEPSEGAPR	_S(ph)LELN(de)GAVEPSEGAPR_	CaMKII_group	CAMK2A	0.0991	0.351	1.4408					Casein kinase II substrate motif
F8W130	334	F8W130	334	F8W130;Q12815;F8W1U0	334;334;42	Tastin	TROAP;TROAP;TROAP	S			-0.185294			-0.185294				1	0.0019922	68.257	0.99999	68.257	51.1087	875.942	1.5785	VVPCPSPFGRAQRVPSPGPPTLTSYSVLRRL	_VPS(ph)PGPPTLTSYSVLR_	MAPK3_MAPK1_MAPK7_NLK_group	MAPK3	0.2285	0.2453	1.6367					14-3-3 domain binding motif;Calmodulin-dependent protein kinase II substrate motif;DNA dependent Protein kinase substrate motif;ERK1,2 kinase substrate motif;G protein-coupled receptor kinase 1 substrate motif;GSK-3, ERK1, ERK2, CDK5 substrate motif;PKA kinase substrate motif;PKC kinase substrate motif;WW domain binding motif
F8W6G1	2	F8W6G1	2	F8W6G1;Q9UHY1;C9JHZ6;C9JDW7	2;2;2;2	Nuclear receptor-binding protein	NRBP1;NRBP1;NRBP1;NRBP1	S			0.673014	0.0233263	-0.125038	0.0343566				1	2.79e-16	155.49	1	155.49	64.7702	865.362	-0.4796	______________MSEGESQTVLSSGSDPK	_(ac)S(ph)EGESQTVLSSGSDPK_										Casein kinase II substrate motif;G protein-coupled receptor kinase 1 substrate motif;GSK3 kinase substrate motif
F8W6G1	441	F8W6G1	441	F8W6G1;Q9UHY1	441;433	Nuclear receptor-binding protein	NRBP1;NRBP1	T			-0.352897	-0.0700272	-0.112116	-0.104248				1	1.73e-31	196.97	0.999825	196.97	37.5617	703.814	-0.37068	EEVTSPVVPPSVKTPTPEPAEVETRKVVLMQ	_TPT(ph)PEPAEVETR_	MAPK3_MAPK1_MAPK7_NLK_group	MAPK1;MAPK3	0.2351	0.384	1.50355					DNA dependent Protein kinase substrate motif;G protein-coupled receptor kinase 1 substrate motif;GSK-3, ERK1, ERK2, CDK5 substrate motif;PKA kinase substrate motif;PKC kinase substrate motif;WW domain binding motif
F8W6H6	1676	F8W6H6	1676	F8W6H6;Q9Y4I1;G3V394;F8WE88;E7ERV5	1676;1651;1649;1648;381	Unconventional myosin-Va	MYO5A;MYO5A;MYO5A;MYO5A;MYO5A	S										1	2.52e-06	119.31	0.352869	119.31	0	961.443	-1.1619	QGVSGVKPTGLRKRTSSIADEGTYTLDSILR	_T(ph)SSIADEGTYTLDSILR_	PAK_group;PKA_group;PKC_group	PAK1;PRKACA;PRKCB	0.1907	0.236	1.3186					Calmodulin-dependent protein kinase II substrate motif;Chk1 kinase substrate motif;PAK2 kinase substrate motif;Pim1 kinase substrate sequence;PKA kinase substrate motif;PKC kinase substrate motif
F8W6H6	1677	F8W6H6	1677	F8W6H6;Q9Y4I1;G3V394;F8WE88;E7ERV5	1677;1652;1650;1649;382	Unconventional myosin-Va	MYO5A;MYO5A;MYO5A;MYO5A;MYO5A	S				-0.260446		-0.260446				1	0.000307221	81.967	0.789704	81.967	8.7567	961.443	0.37673	GVSGVKPTGLRKRTSSIADEGTYTLDSILRQ	_TSS(ph)IADEGTYTLDSILR_	CaMKII_group;PAK_group	CAMK2A;CAMK2G;PAK1	0.129	0.3959	1.6339					14-3-3 domain binding motif;Akt kinase substrate motif;Calmodulin-dependent protein kinase II substrate motif;Casein kinase II substrate motif;MAPKAPK1 kinase substrate motif;MDC1 BRCT domain binding motif;p70 Ribosomal S6 kinase substrate motif;Phosphorylase kinase substrate motif;PKA kinase substrate motif;PKC kinase substrate motif;Plk1 PBD domain binding motif;Pyruvate dehydrogenase kinase su…
F8W6H6	1675	F8W6H6	1675	F8W6H6;Q9Y4I1;G3V394;F8WE88;E7ERV5	1675;1650;1648;1647;380	Unconventional myosin-Va	MYO5A;MYO5A;MYO5A;MYO5A;MYO5A	T										1	2.52e-06	119.31	0.352869	119.31	0	961.443	-1.1619	IQGVSGVKPTGLRKRTSSIADEGTYTLDSIL	_T(ph)SSIADEGTYTLDSILR_	CaMKII_group;PAK_group	CAMK2A;CAMK2G;PAK1	0.1358	0.3959	1.7275					Calmodulin-dependent protein kinase II substrate motif;G protein-coupled receptor kinase 1 substrate motif;PKA kinase substrate motif;PKC kinase substrate motif
F8W8D3	23	F8W8D3	23	F8W8D3;Q14493;E7EUV9	23;23;23	Histone RNA hairpin-binding protein	SLBP;SLBP;SLBP	S					-0.111399	-0.111399				1	0.0115073	59.862	0.993488	59.862	21.8342	655.248	0.36618	PPRHQSRCDGDASPPSPARWSLGRKRRADGR	_CDGDASPPS(ph)PAR_	CDK2_CDK3_CDK1_CDK5_group;MAPK3_MAPK1_MAPK7_NLK_group	CDK1;MAPK3	0.239	0.29475	1.48615					Cdc2 kinase substrate motif;CDK kinase substrate motif;CDK1,2,4,6 kinase substrate motif;DNA dependent Protein kinase substrate motif;ERK1,2 kinase substrate motif;GSK-3, ERK1, ERK2, CDK5 substrate motif;WW domain binding motif
F8W8D3	62	F8W8D3	62	F8W8D3;Q14493;H7C4H8	62;62;70	Histone RNA hairpin-binding protein	SLBP;SLBP;SLBP	T	+		1.30999	0.826762	1.33434	1.30999				1	0.00127441	79.013	0.973707	79.013	15.868	560.27	0.47586	EAEHRGAERRPESFTTPEGPKPRSRCSDWAS	_RPESFTT(ph)PEGPKPR_										G protein-coupled receptor kinase 1 substrate motif;GSK-3, ERK1, ERK2, CDK5 substrate motif;WW domain binding motif
F8W8G5	532	F8W8G5	532	F8W8G5;P10242;E9PLN0	532;532;532	Transcriptional activator Myb	MYB;MYB;MYB	S			-0.0892213	-0.135459	-0.169453	-0.169453				1	1.44e-49	201.3	0.998371	146	27.8745	677.319	0.013092	ENGPPLLKKIKQEVESPTDKSGNFFCSHHWE	_IKQEVES(ph)PTDK_	CDK2_CDK3_CDK1_CDK5_group;CDK4_CDK6_group;CK2_group;HIPK1_HIPK2_group;MAPK3_MAPK1_MAPK7_NLK_group;p38_group	CDK1;CDK2;CDK4;CDK6;CSNK2A1;HIPK1;HIPK2;MAPK1;MAPK11;MAPK3;NLK	0.1105	0.744	2.8364					b-Adrenergic Receptor kinase substrate motif;Casein kinase I substrate motif;Casein kinase II substrate motif;ERK1,2 kinase substrate motif;GSK-3, ERK1, ERK2, CDK5 substrate motif;Pyruvate dehydrogenase kinase substrate motif;WW domain binding motif
F8WA39	661	F8WA39	661	F8WA39;Q13613;B7Z3D5	661;653;559	Myotubularin-related protein 1	MTMR1;MTMR1;MTMR1	S										1	5.75e-18	136.81	0.969535	113.01	16.2413	760.822	0.53274	EVATRAVSSSSERGSSPSHSATSVHTSV___	_GSS(ph)PSHSATSVHTSV_	p38_group	MAPK12	0.1482	0.591	4.4103					14-3-3 domain binding motif;Calmodulin-dependent protein kinase II substrate motif;Casein kinase I substrate motif;Casein kinase II substrate motif;ERK1,2 kinase substrate motif;G protein-coupled receptor kinase 1 substrate motif;GSK3 kinase substrate motif;GSK-3, ERK1, ERK2, CDK5 substrate motif;MDC1 BRCT domain binding motif;PKA kinase substrate motif;PKC kinase substrate motif;Plk1 PBD domain …
F8WAA1	158	F8WAA1	158	F8WAA1;Q9NSI8	158;90	SAM domain-containing protein SAMSN-1	SAMSN1;SAMSN1	S			-0.253223	0.469678	-0.295942	-0.0747297				1	1.14e-134	304.04	1	91.337	82.2403	723.63	-5.812	WTMKKKVGKKYIKALSEEKDEEDGENAHPYR	_ALS(ph)EEKDEEDGENAHPYR_	PKC_group	PRKCB	0.1149	0.1197	1.0684					Casein kinase II substrate motif;G protein-coupled receptor kinase 1 substrate motif;PKA kinase substrate motif;PKC kinase substrate motif
F8WAA1	89	F8WAA1	89	F8WAA1;Q9NSI8	89;21	SAM domain-containing protein SAMSN-1	SAMSN1;SAMSN1	S										1	0.011844	43.594	0.371464	43.594	0	418.175	1.5937	LKSSCSDMDLLHSWRSSSFGNFDRFRNNSLS	_RS(ph)SSFGNFDR_	PAK_group	PAK1	0.1289	0.243	1.2855					Casein kinase II substrate motif
F8WAA1	90	F8WAA1	90	F8WAA1;Q9NSI8	90;22	SAM domain-containing protein SAMSN-1	SAMSN1;SAMSN1	S					-0.821024	-0.821024				1	7.23e-05	84.365	0.723161	84.365	7.18037	418.175	1.2377	KSSCSDMDLLHSWRSSSFGNFDRFRNNSLSK	_RSS(ph)SFGNFDR_	PAK_group;PKA_group	PAK1;PRKACA	0.1976	0.26535	1.2425					MAPKAPK2 kinase substrate motif;MDC1 BRCT domain binding motif;PKA kinase substrate motif;PKC kinase substrate motif;Plk1 PBD domain binding motif
F8WAA1	91	F8WAA1	91	F8WAA1;Q9NSI8	91;23	SAM domain-containing protein SAMSN-1	SAMSN1;SAMSN1	S			-0.0670922	-0.248965	-0.026352	-0.0557262				1	2.56e-15	179.5	0.999991	158.94	50.5392	549.2	-0.1133	SSCSDMDLLHSWRSSSFGNFDRFRNNSLSKP	_SSS(ph)FGN(de)FDR_	CaMKII_group;PAK_group;PKC_group	CAMK2A;PAK1;PRKCA;PRKCB	0.20105	0.1691	1.60245					14-3-3 domain binding motif;Calmodulin-dependent protein kinase II substrate motif;MDC1 BRCT domain binding motif;PKA kinase substrate motif;PKC kinase substrate motif;Plk1 PBD domain binding motif
F8WAC3	16	F8WAC3	16	F8WAC3;Q9NWZ5	16;16	Uridine kinase;Uridine-cytidine kinase-like 1	UCKL1;UCKL1	S			-0.0986291	-0.102372	-0.0104977	-0.0545571				1	0.000291405	86.005	0.858543	86.005	10.8616	731.814	2.1318	MAAPPARADADPSPTSPPTARDTPGRQAEKS	_ADADPSPTS(ph)PPTAR_	MAPK3_MAPK1_MAPK7_NLK_group	MAPK1;MAPK3	0.2929	0.1738	1.8269					Casein kinase I substrate motif;Casein kinase II substrate motif;ERK1,2 kinase substrate motif;G protein-coupled receptor kinase 1 substrate motif;GSK-3, ERK1, ERK2, CDK5 substrate motif;WW domain binding motif
F8WAC3	56	F8WAC3	56	F8WAC3;Q9NWZ5;Q9H3Z3	56;56;41	Uridine kinase;Uridine-cytidine kinase-like 1	UCKL1;UCKL1;UCKL1	S			0.247198	0.241596	0.184471	0.221692				1	0.000144347	90.561	0.990071	84.508	19.9877	665.356	-0.076701	AESLDRLLPPVGTGRSPRKRTTSQCKSEPPL	_LLPPVGTGRS(ph)PR_	PKC_group	PRKCA;PRKCB	0.2135	0.23285	1.58575					Cdc2 kinase substrate motif;CDK kinase substrate motif;CDK1,2,4,6 kinase substrate motif;ERK1,2 kinase substrate motif;Growth associated histone HI kinase substrate motif;GSK-3, ERK1, ERK2, CDK5 substrate motif;PKA kinase substrate motif;PKC kinase substrate motif;WW domain binding motif
F8WAC3	53	F8WAC3	53	F8WAC3;Q9NWZ5;Q9H3Z3	53;53;38	Uridine kinase;Uridine-cytidine kinase-like 1	UCKL1;UCKL1;UCKL1	T					0.225768	0.225768				1	0.00177313	78.505	0.621186	78.505	2.14795	443.906	-0.84573	RSNAESLDRLLPPVGTGRSPRKRTTSQCKSE	_LLPPVGT(ph)GRSPR_	PKC_group;TTK	PRKCA;PRKCB;TTK	0.2087	0.2805	1.8443					Casein kinase I substrate motif;Casein kinase II substrate motif;G protein-coupled receptor kinase 1 substrate motif;PKA kinase substrate motif;PKC kinase substrate motif
F8WAR4	143	F8WAR4	143	F8WAR4;C9JRZ6;Q9NX63;G3V1K1	143;113;113;113	Coiled-coil-helix-coiled-coil-helix domain-containing protein 3, mitochondrial	CHCHD3;CHCHD3;CHCHD3;CHCHD3	S			0.205518	-0.0767367	-0.135095	-0.0767367		-0.0225955		0.935703	8.94e-16	188.15	1	166.62	166.624	644.255	0.51359	ANEQLTRAILRERICSEEERAKAKHLARQLE	_ERICS(ph)EEER_	CaMKII_group;PDHK_group	CAMK2A;PDK1	0.1166	0.33395	2.71245					14-3-3 domain binding motif;Akt kinase substrate motif;AMP-activated protein kinase 2 substrate motif;BARD1 BRCT domain binding motif;Calmodulin-dependent protein kinase II substrate motif;Casein kinase II substrate motif;G protein-coupled receptor kinase 1 substrate motif;MAPKAPK1 kinase substrate motif;PKA kinase substrate motif;PKC kinase substrate motif
F8WAR4	29	F8WAR4	29	F8WAR4;C9JRZ6;Q9NX63;G3V1K1;F8WD73	29;29;29;29;29	Coiled-coil-helix-coiled-coil-helix domain-containing protein 3, mitochondrial	CHCHD3;CHCHD3;CHCHD3;CHCHD3;CHCHD3	S			0.0157831	0.102053	-0.230939	0.015783		-0.0225955		0.935703	0.00126633	73.722	1	51.073	51.0726	676.34	0.43492	ADENENITVVKGIRLSENVIDRMKESSPSGS	_GIRLS(ph)ENVIDR_	PAK_group;PKC_group	PAK1;PRKCB	0.11815	0.1601	1.17575					G protein-coupled receptor kinase 1 substrate motif;PKA kinase substrate motif;PKC kinase substrate motif
F8WAR4	50	F8WAR4	50	F8WAR4;C9JRZ6;Q9NX63;G3V1K1	50;50;50;50	Coiled-coil-helix-coiled-coil-helix domain-containing protein 3, mitochondrial	CHCHD3;CHCHD3;CHCHD3;CHCHD3	S			1.2893	1.21959		1.25447	0.103128	-0.0225955		0.935703	2.05e-24	146.67	0.999999	146.67	62.6222	828.345	0.60303	RMKESSPSGSKSQRYSGAYGASVSDEELKRR	_YS(ph)GAYGASVSDEELK_	PAK_group	PAK1	0.1891	0.1839	1.3617					Casein kinase II substrate motif;MAPKAPK2 kinase substrate motif;PKA kinase substrate motif;PKC kinase substrate motif
F8WBV6	32	F8WBV6	32	F8WBV6;B8ZZY7;C9JQZ0;P84101;B9A031;F8WBN3	32;32;18;32;18;32	Small EDRK-rich factor 2	SERF2;SERF2;SERF2;SERF2;SERF2;SERF2	S				0.127369		0.127369				1	0.00612608	63.727	1	63.727	63.7269	478.198	1.1354	KQSDSVKGKRRDDGLSAAARKQSAITSSRNF	_DDGLS(ph)AAAR_										Casein kinase I substrate motif
[truncated: 9,073 more rows]
